# Supplementary material for: Isotopic biomonitoring of anthropic carbon emissions in a megalopolis
Source: PeerJ. 2020 May 29;8:e9283. doi: 10.7717/peerj.9283 (PMC7263291; doi:10.7717/peerj.9283)
Supplement: Supplemental Information 1 — Geographic coordinates of (A) Mexico City’s Air Quality Network Monitoring Stations, (B) Carbon monoxide concentrations during 2014, and (C) Tissue carbon content (% dry mass) and δ13C of Tillandsia usneoides sampled during 2014 in the Mexico Valley. [file peerj-08-9283-s001.xlsx]

## Sheet: Location of monitoring stations
x	y		acron	station
-98.912	19.6355	ACO	ACO	Acolman
-99.2541	19.577	ATI	ATI	Atizapan
-99.1698	19.4684	CAM	CAM	Camarones
-99.1761	19.3261	CCA	CCA	Centro de Ciencias de la Atmósfera
-99.2917	19.3653	CUA	CUA	Cuajimalpa
-99.2435	19.4825	FAC	FAC	FES Acatlán
-99.1522	19.4116	HGM	HGM	Hospital General de México
-99.1176	19.3844	IZT	IZT	Iztacalco
-99.1196	19.4246	MER	MER	Merced
-99.0282	19.3937	NEZ	NEZ	Nezahualcóyotl
-99.2041	19.3251	PED	PED	Pedregal
-99.2629	19.3574	SFE	SFE	Santa fe
-99.0861	19.4526	SJA	SJA	San Juan Aragón
-99.15	19.3145	SUR	SUR	Santa Ursula
-99.0106	19.2465	TAH	TAH	Tlahuac
-99.2046	19.5291	TLA	TLA	Tlalnepantla
-99.1772	19.6025	TLI	TLI	Tultitlán
-99.1036	19.3044	UAX	UAX	UAM Xochimilco
-99.0739	19.3608	UIZ	UIZ	UAM Iztapalapa
-99.0966	19.6582	VIF	VIF	Villa de las Flores
-99.0824	19.526	XAL	XAL	Xalostoc

## Sheet: CO Concentrations 2014
FECHA	HORA	ACO	ATI	CAM	CHO	CCA	CUA	FAC	HGM	IZT	LLA	LPR	MER	MON	NEZ	PED	SAG	SFE	SJA	SUR	TAH	TLA	TLI	UAX	UIZ	VIF	XAL
2014-01-01	1	0.3	0.5	0.5	-99	-99	1.3	0.7	-99	0.6	-99	-99	0.8	-99	1	-99	-99	1.2	0.7	0.9	1.3	0.4	0.7	1.2	-99	0.9	1.2
2014-01-01	2	0.2	0.6	0.4	-99	-99	1.2	0.9	-99	-99	-99	-99	0.7	-99	1	-99	-99	-99	0.8	1.4	0.9	0.5	0.7	1	-99	0.9	1.1
2014-01-01	3	0.2	0.8	0.6	-99	-99	1.3	1.6	-99	1	-99	-99	1	-99	1.2	-99	-99	1.2	0.7	1.3	1.3	0.7	0.8	1	0.7	0.9	1.2
2014-01-01	4	0.2	1	0.9	-99	-99	1.2	2	-99	1	-99	-99	0.8	-99	1.4	-99	-99	1.1	0.7	1.4	1.5	1	0.8	1.3	1	0.7	1.2
2014-01-01	5	0.3	0.8	1	-99	-99	1.4	1.9	-99	1	-99	-99	1	-99	1.2	-99	-99	1	0.7	1.5	1.3	1	1	1.4	1.1	0.7	1.1
2014-01-01	6	0.4	0.9	0.8	-99	-99	1.5	1.4	0.9	1	-99	-99	1.3	-99	1	0.8	-99	0.9	0.9	1.6	1.5	1.1	0.9	1.4	0.9	0.7	1.3
2014-01-01	7	0.3	0.9	0.9	-99	-99	1.5	1.1	1.1	0.9	-99	-99	1.1	-99	1.1	0.9	-99	0.8	0.7	1.4	1.4	1.2	0.9	1.2	0.7	0.6	1.2
2014-01-01	8	0.4	0.9	0.8	-99	-99	1.2	1.1	0.7	0.7	-99	-99	1	-99	1.2	1	-99	0.9	0.5	1.4	1.3	1	0.8	1	0.9	0.5	0.7
2014-01-01	9	0.3	0.8	0.7	-99	-99	1	1.1	0.7	0.7	-99	-99	0.9	-99	1.1	0.8	-99	1	0.5	1.2	1.7	0.9	0.6	1.2	1.1	0.6	0.6
2014-01-01	10	0.3	0.9	0.6	-99	-99	1	1.2	0.7	0.7	-99	-99	0.8	-99	0.9	0.7	-99	1.1	0.5	1.2	1.6	0.8	0.8	1.2	0.8	0.7	0.8
2014-01-01	11	-99	1	0.6	-99	-99	1.1	1	0.7	0.6	-99	-99	0.8	-99	1.1	0.7	-99	1	0.4	1.2	1.1	0.7	0.7	1	0.7	0.7	0.6
2014-01-01	12	-99	0.8	0.6	-99	-99	1	1	0.8	0.6	-99	-99	0.9	-99	1	0.7	-99	1	0.4	1.2	1	0.7	0.7	1	0.8	0.6	0.5
2014-01-01	13	0.1	0.8	0.5	-99	-99	0.8	0.8	0.7	0.6	-99	-99	0.9	-99	1	0.6	-99	0.9	0.4	1	0.8	0.6	0.5	1	0.7	0.5	0.4
2014-01-01	14	0.1	0.6	0.5	-99	-99	0.8	0.7	0.6	0.5	-99	-99	0.7	-99	0.8	0.6	-99	0.9	0.4	0.9	0.5	0.4	0.3	0.7	0.6	0.4	0.4
2014-01-01	15	0.1	0.5	0.5	-99	-99	0.8	0.7	0.5	0.4	-99	-99	0.6	-99	0.5	0.5	-99	0.7	0.3	0.6	0.3	0.5	0.3	0.4	0.3	0.5	0.4
2014-01-01	16	0.1	0.6	0.4	-99	-99	0.7	0.7	0.4	0.4	-99	-99	0.5	-99	0.5	0.2	-99	0.7	0.2	0.4	0.2	0.5	0.3	0.4	0.2	0.4	0.3
2014-01-01	17	0.1	0.6	0.4	-99	-99	0.5	0.7	0.4	0.4	-99	-99	0.5	-99	0.6	0.2	-99	0.6	0.2	0.4	0.2	0.6	0.3	0.4	0.4	0.4	0.3
2014-01-01	18	0.1	0.7	0.5	-99	-99	0.5	0.6	0.5	0.6	-99	-99	0.7	-99	0.7	0.2	-99	0.4	0.4	0.5	0.2	0.8	0.4	0.5	0.4	0.6	0.3
2014-01-01	19	0.1	0.6	0.6	-99	-99	0.6	0.5	0.6	0.6	-99	-99	0.8	-99	0.9	0.3	-99	0.5	0.5	0.7	0.3	0.9	0.5	0.5	0.5	0.7	0.5
2014-01-01	20	0.2	0.5	0.6	-99	-99	0.5	0.6	0.4	0.7	-99	-99	0.9	-99	1	0.3	-99	0.5	0.7	0.9	0.6	0.6	0.8	0.6	0.4	0.7	0.6
2014-01-01	21	0.3	0.9	1	-99	-99	0.5	0.7	0.9	0.8	-99	-99	1.2	-99	1	0.3	-99	0.5	0.8	1	0.8	0.9	0.8	0.8	0.7	0.7	0.7
2014-01-01	22	0.3	0.7	1	-99	-99	0.5	0.6	1.3	1.5	-99	-99	1.6	-99	1	0.4	-99	0.5	0.9	1.2	1.2	0.9	0.7	0.9	0.9	0.7	0.7
2014-01-01	23	0.5	0.7	0.8	-99	-99	0.6	0.6	0.8	1.1	-99	-99	2	-99	1	0.4	-99	0.7	1.2	1.3	1.2	0.9	0.7	0.8	0.9	1	1
2014-01-01	24	-99	0.6	0.7	-99	-99	0.6	0.6	0.7	0.6	-99	-99	1.1	-99	0.9	0.4	-99	0.6	1	1.3	0.9	0.8	0.8	0.9	0.9	1	-99
2014-01-02	1	-99	0.4	0.8	-99	-99	0.6	0.6	0.5	0.4	-99	-99	1	-99	1	0.3	-99	0.5	0.7	0.9	0.9	0.8	0.6	0.8	0.9	0.8	-99
2014-01-02	2	-99	0.3	0.8	-99	-99	0.5	0.6	0.6	0.9	-99	-99	1	-99	1.3	0.3	-99	0.5	0.7	0.9	0.6	0.8	0.6	0.8	0.8	0.9	-99
2014-01-02	3	-99	0.2	0.4	-99	-99	0.4	0.4	0.6	0.6	-99	-99	0.9	-99	1	0.2	-99	0.5	0.7	1	0.8	0.5	0.5	0.6	0.6	0.8	-99
2014-01-02	4	-99	0.2	0.3	-99	-99	0.5	0.4	0.9	0.5	-99	-99	1.1	-99	0.7	0.2	-99	0.4	0.5	0.9	0.6	0.4	0.4	0.7	0.5	0.6	-99
2014-01-02	5	-99	0.3	0.5	-99	-99	0.5	0.5	0.7	0.5	-99	-99	0.7	-99	0.8	0.2	-99	0.4	0.5	0.7	0.6	0.4	0.4	0.6	0.6	0.7	0.8
2014-01-02	6	-99	0.5	0.6	-99	-99	0.6	0.7	0.6	0.6	-99	-99	1.3	-99	0.9	0.2	-99	0.5	1.2	0.8	0.7	0.7	0.5	0.6	0.7	0.8	1
2014-01-02	7	-99	1	0.8	-99	-99	1.1	1.4	1	1.2	-99	-99	2.4	-99	1.6	0.3	-99	0.7	1.6	1.4	0.6	1	0.6	0.9	0.9	1	1.5
2014-01-02	8	-99	1.9	1.6	-99	-99	1.4	1.6	1.7	2.2	-99	-99	2.9	-99	1.8	0.6	-99	0.8	1.3	1.5	1.1	1.8	1	1.1	1.6	1.9	1.4
2014-01-02	9	-99	2.2	1.8	-99	-99	1.3	1.8	2.1	2.3	-99	-99	2.5	-99	3.3	1.1	-99	0.8	1.3	1.4	2.2	1.7	1.6	1.1	2.3	1.6	2.2
2014-01-02	10	-99	1.1	1.6	-99	-99	0.8	1.5	2.3	2	-99	-99	2	-99	2.1	1.1	-99	0.9	1.1	1.5	1.3	1.4	1.4	1.3	2.3	1.2	2.2
2014-01-02	11	-99	0.7	1.2	-99	-99	0.7	1.2	1.4	1.2	-99	-99	1.9	-99	1	0.8	-99	0.6	1.1	1.4	0.6	1.5	0.6	1.3	1.6	0.6	1.9
2014-01-02	12	-99	0.8	0.6	-99	-99	0.8	1	1	1	-99	-99	1.4	-99	0.9	0.5	-99	0.7	0.9	1.4	0.9	0.9	0.4	1.3	1.1	0.5	0.9
2014-01-02	13	-99	0.5	0.8	-99	-99	0.9	0.7	0.9	0.9	-99	-99	1.1	-99	0.8	0.7	-99	0.9	0.3	1.1	0.7	0.6	0.2	1.2	0.9	0.4	0.5
2014-01-02	14	-99	0.4	0.4	-99	-99	0.8	0.6	0.5	0.4	-99	-99	0.6	-99	0.5	0.6	-99	0.8	0.2	1.1	0.6	0.5	0.2	0.9	0.5	0.3	0.4
2014-01-02	15	-99	0.4	0.5	-99	-99	0.8	0.7	0.5	0.4	-99	-99	0.7	-99	0.6	0.3	-99	0.8	0.2	0.7	0.5	0.6	0.2	0.6	0.4	0.3	0.5
2014-01-02	16	-99	0.5	0.5	-99	-99	0.7	0.7	0.7	0.5	-99	-99	1.2	-99	0.7	0.4	-99	0.7	0.3	0.8	0.5	0.7	0.2	0.6	0.5	0.3	0.3
2014-01-02	17	-99	0.4	0.5	-99	-99	0.6	0.6	0.6	0.4	-99	-99	1.1	-99	1	0.3	-99	0.6	0.3	0.8	-99	0.6	0.3	0.7	0.7	0.4	0.3
2014-01-02	18	-99	0.4	0.5	-99	-99	0.5	0.6	0.6	0.5	-99	-99	0.8	-99	0.9	0.3	-99	0.5	0.3	0.7	-99	0.6	0.3	0.7	0.7	0.4	0.3
2014-01-02	19	-99	0.5	0.5	-99	-99	0.6	0.7	0.6	0.5	-99	-99	1	-99	1.1	0.3	-99	0.6	0.3	0.8	0.8	0.6	0.3	0.7	0.7	0.4	0.3
2014-01-02	20	-99	0.4	0.4	-99	-99	0.5	0.5	0.6	0.4	-99	-99	0.9	-99	0.9	0.3	-99	0.5	0.3	0.8	0.9	0.5	0.3	0.7	0.6	0.3	0.3
2014-01-02	21	-99	0.5	0.3	-99	-99	0.5	0.5	0.5	0.3	-99	-99	0.8	-99	0.8	0.2	-99	0.4	0.2	0.7	0.8	0.4	0.3	0.6	0.5	0.4	0.2
2014-01-02	22	-99	0.4	0.3	-99	-99	0.5	0.4	0.5	0.3	-99	-99	0.6	-99	0.8	0.2	-99	0.5	0.2	0.6	0.7	0.4	0.3	0.6	0.4	0.3	0.2
2014-01-02	23	-99	0.3	0.4	-99	-99	0.5	0.4	0.5	0.3	-99	-99	0.5	-99	0.7	0.2	-99	0.4	0.2	0.6	0.6	0.4	0.3	0.6	0.3	0.3	0.2
2014-01-02	24	-99	0.3	0.3	-99	-99	0.4	0.3	0.5	0.2	-99	-99	0.5	-99	0.6	0.2	-99	0.4	0.2	0.5	-99	0.3	0.2	-99	0.2	0.3	0.2
2014-01-03	1	-99	0.2	0.2	-99	-99	0.4	0.3	0.4	0.2	-99	-99	0.5	-99	0.5	0.1	-99	0.4	0.2	0.4	0.6	0.2	0.1	-99	0.2	0.2	0.2
2014-01-03	2	-99	0.2	0.2	-99	-99	0.4	0.3	0.3	0.1	-99	-99	0.4	-99	0.4	0.1	-99	0.4	0.1	0.3	0.6	0.2	0.1	-99	0.1	0.2	0.2
2014-01-03	3	-99	0.2	0.2	-99	-99	0.4	0.3	0.4	0.1	-99	-99	0.4	-99	0.4	0.1	-99	0.4	0.1	0.3	0.5	0.2	0	-99	0.1	0.2	0.2
2014-01-03	4	-99	0.2	0.1	-99	-99	0.4	0.3	0.4	0.1	-99	-99	0.4	-99	0.4	0.1	-99	0.4	0.1	0.3	0.5	0.2	0	-99	0.1	0.1	0.2
2014-01-03	5	-99	0.2	0.1	-99	-99	0.4	0.3	0.3	0.1	-99	-99	0.4	-99	0.4	0.1	-99	0.4	0.1	0.3	0.5	0.2	0	-99	0.2	0.1	0.3
2014-01-03	6	-99	0.3	0.2	-99	-99	0.4	0.3	0.3	0.1	-99	-99	0.6	-99	0.4	0.1	-99	0.4	0.2	0.3	0.5	0.2	0.1	0.2	0.2	0.2	0.6
2014-01-03	7	-99	0.4	0.4	-99	-99	0.5	0.4	0.4	0.3	-99	-99	0.9	-99	0.6	0.2	-99	0.4	0.3	0.5	0.6	0.3	0.1	0.2	0.4	0.2	0.7
2014-01-03	8	-99	0.6	0.5	-99	-99	0.6	0.7	0.6	0.4	-99	-99	1.2	-99	0.7	0.2	-99	0.5	0.4	0.6	0.7	0.4	0.2	0.3	0.6	0.3	0.9
2014-01-03	9	-99	0.6	0.6	-99	-99	0.8	0.7	0.8	0.6	-99	-99	1.4	-99	0.8	0.3	-99	0.7	0.5	0.9	0.8	0.7	0.3	0.6	0.6	0.4	0.8
2014-01-03	10	-99	0.7	0.7	-99	-99	0.9	0.6	0.7	0.7	-99	-99	1.2	-99	0.7	0.4	-99	0.7	0.7	0.9	0.9	0.8	0.2	0.6	0.8	0.3	1
2014-01-03	11	-99	0.7	0.6	-99	-99	1	0.6	0.9	0.7	-99	-99	1.4	-99	0.7	0.3	-99	0.7	0.8	0.7	0.9	0.8	0.4	0.6	1	0.3	1
2014-01-03	12	-99	0.6	0.6	-99	-99	1.1	0.7	1	0.9	-99	-99	1.4	-99	0.7	0.4	-99	0.7	0.5	0.9	0.6	0.8	0.5	0.6	0.8	0.3	1
2014-01-03	13	-99	0.6	0.8	-99	-99	0.9	0.9	1.2	1	-99	-99	1.4	-99	0.9	0.4	-99	0.7	0.5	0.9	0.6	0.9	0.7	0.7	0.8	0.5	1
2014-01-03	14	-99	0.8	1	-99	-99	0.9	1	1.3	0.8	-99	-99	1.3	-99	1	0.5	-99	0.8	0.4	1	0.7	1.1	0.7	0.8	0.9	0.6	0.8
2014-01-03	15	-99	0.9	1	-99	-99	1	1.1	1.2	0.8	-99	-99	1.5	-99	1.1	0.5	-99	1	0.5	1.2	0.6	1.2	0.7	0.8	0.9	0.6	0.8
2014-01-03	16	-99	0.8	0.5	-99	-99	0.9	1	0.8	0.6	-99	-99	1.5	-99	1.2	0.6	-99	0.8	0.5	1.2	0.7	0.6	0.6	0.9	1	0.7	0.7
2014-01-03	17	-99	0.5	0.5	-99	-99	0.8	0.9	0.6	0.4	-99	-99	1.3	-99	1.2	0.6	-99	0.6	0.4	1.2	1.3	0.5	0.2	0.9	0.9	0.9	0.6
2014-01-03	18	-99	0.5	0.9	-99	-99	1.2	1.3	0.9	0.7	-99	-99	1.6	-99	0.8	0.8	-99	1.1	0.6	1.3	1.3	0.9	0.4	1	0.7	0.5	0.9
2014-01-03	19	-99	1	1.5	-99	-99	1.5	1.4	1.3	1	-99	-99	2.1	-99	1.4	1.2	-99	1.7	0.8	2	1.1	1.8	1	1.3	1.6	0.9	1.6
2014-01-03	20	-99	0.9	2.1	-99	-99	1.5	2.8	1.7	1.3	-99	-99	2.3	-99	1.7	1.6	-99	1.4	1.2	1.8	1.1	2.5	1.2	1.6	1.9	1	2.1
2014-01-03	21	-99	0.9	1.8	-99	-99	1.7	2.8	2	1.3	-99	-99	2.4	-99	1.9	1.2	-99	0.9	1.8	2.3	1.6	1.9	1.1	1.4	1.7	1.1	1.7
2014-01-03	22	-99	0.8	1.7	-99	-99	1.6	2.5	2	1.3	-99	-99	2.1	-99	2	0.6	-99	0.9	2	3.1	1.2	2	1.1	1.3	1.8	1.4	1
2014-01-03	23	-99	0.7	1.8	-99	-99	1.1	1.5	1.4	1.3	-99	-99	1.7	-99	2.1	0.5	-99	0.8	1.9	3.5	1.3	2.2	1	1.1	2.1	1.2	1.6
2014-01-03	24	-99	0.5	1.3	-99	-99	1.2	1.3	1	1.2	-99	-99	1.5	-99	1.9	0.5	-99	0.7	1.8	2.3	1.1	1.8	0.9	1.1	1.8	1.8	1.3
2014-01-04	1	-99	0.5	0.8	-99	-99	0.8	1.3	1.6	1.3	-99	-99	1.7	-99	2.7	0.5	-99	0.7	1.6	2.3	1.5	1.3	0.7	1.2	1.7	1.3	1.9
2014-01-04	2	-99	0.4	0.6	-99	-99	0.7	0.9	1.6	1.4	-99	-99	2.2	-99	2	0.4	-99	0.6	0.9	2.1	0.9	1	0.7	1.1	1.4	1.1	1.9
2014-01-04	3	-99	0.4	0.5	-99	-99	0.6	0.8	1.4	1.3	-99	-99	2.1	-99	1.7	0.4	-99	0.6	0.9	1.3	1.1	0.8	0.6	1	1	1.1	1.6
2014-01-04	4	-99	0.4	0.6	-99	-99	0.5	0.7	1.4	1	-99	-99	2	-99	1.5	0.3	-99	0.4	1.4	0.9	0.8	0.7	0.7	0.6	0.9	1.1	1.2
2014-01-04	5	-99	0.5	0.7	-99	-99	0.6	0.7	1	0.9	-99	-99	1.9	-99	1.6	0.2	-99	0.4	1.4	0.9	0.9	0.8	0.9	0.5	0.7	1.4	1.9
2014-01-04	6	-99	0.7	0.9	-99	-99	0.5	0.8	0.9	0.8	-99	-99	1.7	-99	1.9	0.2	-99	0.5	1.3	1.2	0.7	0.8	1.3	0.5	0.9	1.2	2.8
2014-01-04	7	-99	1.2	1.7	-99	-99	0.7	1.2	1.1	1.1	-99	-99	2.4	-99	2.4	0.3	-99	0.5	2.8	2	1	1.2	1.4	0.6	1.4	1.4	3.1
2014-01-04	8	-99	1.8	2.7	-99	-99	0.8	2.1	1.9	1.4	-99	-99	3.1	-99	2.7	0.4	-99	0.7	2.3	2.6	1.2	1.4	2.2	1	1.6	1.6	2.7
2014-01-04	9	-99	2.1	2.3	-99	-99	1.1	1.9	2.2	1.3	-99	-99	2.9	-99	3.8	0.5	-99	0.7	1.8	1.7	1.6	2.1	2.5	1	1.6	1.7	2.7
2014-01-04	10	-99	1.2	2.2	-99	-99	1	2.4	1.8	1.3	-99	-99	2.6	-99	3.9	1	-99	0.8	1.7	1.5	1.2	1.6	1.9	0.6	1.8	1.6	2.1
2014-01-04	11	-99	1.2	1.9	-99	-99	0.7	2.1	1.7	2	-99	-99	2.2	-99	2.9	0.8	-99	1.2	1.3	1.2	0.9	1.5	1.3	0.7	1.6	1.1	1.8
2014-01-04	12	-99	0.9	1.2	-99	-99	0.4	1.4	1.6	1.3	-99	-99	1.3	-99	1.6	0.6	-99	1	0.6	0.9	0.6	1	1	0.9	1.7	0.9	1
2014-01-04	13	-99	0.9	0.8	-99	-99	0.4	1	1.2	0.9	-99	-99	0.9	-99	0.8	0.5	-99	0.6	0.3	0.9	0.4	0.7	0.4	0.5	0.9	0.3	0.7
2014-01-04	14	-99	0.6	0.7	-99	-99	0.4	0.9	1	0.8	-99	-99	1	-99	0.9	0.5	-99	0.3	0.4	0.8	0.4	0.9	0.4	0.4	0.8	0.4	0.7
2014-01-04	15	-99	0.5	0.7	-99	-99	0.4	0.8	0.8	0.8	-99	-99	0.8	-99	0.9	0.4	-99	0.4	0.4	0.7	0.4	0.8	0.3	0.4	0.7	0.4	0.8
2014-01-04	16	-99	0.5	0.6	-99	-99	0.4	0.8	0.7	0.7	-99	-99	1.2	-99	0.8	0.4	-99	0.4	0.4	0.7	0.5	0.7	0.3	0.4	0.6	0.4	0.8
2014-01-04	17	-99	0.3	0.6	-99	-99	0.5	0.7	0.7	0.7	-99	-99	0.9	-99	0.9	0.4	-99	0.4	0.5	0.8	0.6	0.6	0.2	0.4	0.7	0.4	0.8
2014-01-04	18	-99	0.4	0.6	-99	-99	0.5	0.5	0.7	0.7	-99	-99	1.1	-99	1	0.3	-99	0.5	0.7	0.9	0.7	0.6	0.4	0.5	0.7	0.5	0.8
2014-01-04	19	-99	0.5	0.9	-99	-99	0.6	0.7	0.6	1	-99	-99	1.1	-99	1.3	0.3	-99	0.6	0.8	0.7	0.7	0.7	0.8	0.6	0.9	1.1	1
2014-01-04	20	-99	0.8	1	-99	-99	0.7	1.6	0.8	1	-99	-99	1.1	-99	1	0.3	-99	0.9	0.9	1.2	1.2	1	0.7	0.7	0.9	1	0.7
2014-01-04	21	-99	0.6	1.4	-99	-99	1	1.7	1.3	1.6	-99	-99	1.7	-99	0.9	0.6	-99	0.6	1	1.7	1.8	1.8	1.1	0.7	1.5	1.4	1.3
2014-01-04	22	-99	1.6	1.8	-99	-99	1	1.9	1.6	1.4	-99	-99	2.1	-99	1.4	0.6	-99	0.7	1.3	1.3	1.3	1.5	1.5	0.9	1.6	1.6	1.6
2014-01-04	23	-99	1.5	1.5	-99	-99	0.6	1.5	1.7	1.8	-99	-99	2.8	-99	1.9	0.8	-99	0.7	1.9	1.6	1.7	1.3	1.5	1.1	1.2	2.6	1.4
2014-01-04	24	-99	1.1	1.2	-99	-99	0.6	1.9	2	2.4	-99	-99	2.1	-99	2.1	0.5	-99	-99	2.7	2.6	1.2	1.5	2	1.3	1.7	2.6	2.9
2014-01-05	1	-99	1.1	1	-99	-99	0.7	1.2	1.7	1.6	-99	-99	2.4	-99	2.5	0.4	-99	-99	2.8	2.1	1.1	0.8	2.1	1.1	1.7	2.4	2.6
2014-01-05	2	-99	1.1	0.8	-99	-99	0.8	0.9	2	1.3	-99	-99	2.4	-99	2.3	0.4	-99	-99	2.8	2	1.1	0.8	1.7	1.2	1.4	1.8	1.6
2014-01-05	3	-99	0.8	0.5	-99	-99	0.6	1.2	1.5	1	-99	-99	2	-99	2.2	0.3	-99	-99	2.1	2	1	1.2	1.6	1.1	1.2	1.6	1.5
2014-01-05	4	-99	0.7	0.4	-99	-99	0.5	0.8	1.2	0.9	-99	-99	1.9	-99	2.2	0.3	-99	-99	1.6	1.5	0.7	1.1	1.2	1	1	1.2	1.8
2014-01-05	5	-99	0.6	0.4	-99	-99	0.5	0.7	1.2	1	-99	-99	2.5	-99	2.4	0.3	-99	-99	1.8	1.1	0.8	0.6	1.2	0.8	0.9	1.4	1.1
2014-01-05	6	-99	0.8	0.7	-99	-99	0.6	0.9	1	1	-99	-99	2.3	-99	1.9	0.3	-99	0.3	1.9	1.1	0.7	0.7	1.2	0.6	0.9	1.3	1.6
2014-01-05	7	-99	0.9	1.1	-99	-99	0.5	1	1	1.1	-99	-99	2.2	-99	1.8	0.6	-99	0.4	2.3	1.2	1	0.7	1.3	0.8	0.9	1.2	2.4
2014-01-05	8	-99	1.5	1.8	-99	-99	1.1	1.5	1.7	2.2	-99	-99	3.5	-99	1.7	0.4	-99	0.4	3.6	2.2	1	1.1	1.5	1.1	3	1.4	2.8
2014-01-05	9	-99	1.7	1.4	-99	-99	0.9	1.6	1.6	3.1	-99	-99	2.5	-99	1.8	0.7	-99	0.5	1.9	2.2	1.9	2	1.4	0.9	3.2	1.5	2.7
2014-01-05	10	-99	1.4	1.2	-99	-99	0.7	1.3	2.2	1.6	-99	-99	2.3	-99	1.3	1	-99	0.4	1	1.5	1.1	2	1.1	1.2	1.9	1.3	2.3
2014-01-05	11	-99	1.1	1.6	-99	-99	0.9	1.2	1.5	1.1	-99	-99	1.3	-99	1.3	0.7	-99	0.9	1.1	1.4	0.9	1.4	1	1.2	1.4	-99	1.2
2014-01-05	12	-99	1.1	0.9	-99	-99	1.1	1.4	1	0.8	-99	-99	1	-99	1.3	0.8	-99	0.8	0.5	1.4	0.7	1.2	0.8	0.9	1.2	0.8	0.8
2014-01-05	13	-99	0.9	0.6	-99	-99	1	1.3	0.8	0.8	-99	-99	0.9	-99	1.1	0.8	-99	0.7	0.4	1.1	0.5	0.9	0.7	0.7	1	0.9	0.5
2014-01-05	14	-99	1.1	0.6	-99	-99	0.5	1.1	0.8	0.8	-99	-99	0.9	-99	0.6	0.6	-99	0.7	0.5	0.8	0.4	0.9	0.7	0.6	0.6	0.8	0.5
2014-01-05	15	-99	0.9	0.6	-99	-99	0.5	1	0.8	0.6	-99	-99	0.9	-99	0.5	0.5	-99	0.6	0.6	0.8	0.4	1.1	0.5	0.4	0.5	0.8	0.6
2014-01-05	16	-99	0.5	0.6	-99	-99	0.6	1	0.7	0.6	-99	-99	1.1	-99	0.6	0.5	-99	0.2	0.6	0.8	0.4	0.9	0.4	0.3	0.5	0.6	0.8
2014-01-05	17	-99	0.4	0.7	-99	-99	0.7	0.8	0.8	0.6	-99	-99	1	-99	0.6	0.4	-99	0.6	0.6	-99	0.4	0.7	0.3	0.3	0.3	0.3	0.8
2014-01-05	18	-99	0.6	0.7	-99	-99	0.7	0.8	0.8	0.7	-99	-99	0.9	-99	0.7	0.3	-99	0.6	0.7	0.8	0.5	0.5	0.3	0.4	0.4	0.5	0.6
2014-01-05	19	-99	0.6	0.7	-99	-99	0.6	0.9	0.9	0.9	-99	-99	0.9	-99	0.8	0.5	-99	0.4	0.6	1.1	0.5	0.6	0.6	0.5	0.5	0.7	1
2014-01-05	20	-99	-99	1.1	-99	-99	0.6	0.9	0.9	1.1	-99	-99	1.2	-99	0.9	0.5	-99	0.4	0.7	1.3	-99	1.6	0.7	0.5	0.8	0.8	0.8
2014-01-05	21	-99	0.8	1.3	-99	-99	0.7	1.1	1.3	1.2	-99	-99	1.6	-99	1.2	0.7	-99	0.5	0.9	1.4	1.8	1.1	0.5	0.8	1.1	1	0.9
2014-01-05	22	-99	0.8	1.1	-99	-99	0.9	1.3	1.4	1.6	-99	-99	1.4	-99	1.3	1	-99	0.8	1	1.6	1.4	1.2	1	0.9	-99	1.2	1.7
2014-01-05	23	-99	0.6	1.6	-99	-99	0.9	1.4	1.3	1.4	-99	-99	1.8	-99	1.3	1.1	-99	0.8	1	1.5	1.6	1	0.8	1	-99	0.8	1.5
2014-01-05	24	-99	0.5	1.6	-99	-99	0.9	0.8	1.6	1.3	-99	-99	1.3	-99	1.2	1.2	-99	0.8	1.1	1.9	1.5	-99	0.7	1.2	-99	0.6	1
2014-01-06	1	-99	0.4	0.6	-99	-99	0.7	0.5	0.8	1.3	-99	-99	1.7	-99	1.5	1.2	-99	0.6	1.3	2.4	1.5	-99	0.4	1.2	-99	0.4	0.8
2014-01-06	2	-99	0.3	0.3	-99	-99	0.5	0.4	0.4	0.4	-99	-99	0.6	-99	0.8	0.3	-99	0.3	0.8	0.9	1.6	-99	0.4	1	-99	0.3	0.3
2014-01-06	3	-99	0.4	0.3	-99	-99	0.4	0.4	0.3	0.2	-99	-99	0.5	-99	0.8	0.1	-99	0.2	0.4	0.5	0.7	-99	0.3	0.3	-99	0.3	0.4
2014-01-06	4	-99	0.4	0.3	-99	-99	0.6	0.4	0.3	0.2	-99	-99	0.5	-99	0.8	0.2	-99	0.3	0.3	0.7	0.5	-99	0.3	0.3	0.4	0.3	0.6
2014-01-06	5	-99	0.4	0.4	-99	-99	0.8	0.5	0.3	0.2	-99	-99	0.6	-99	0.6	0.3	-99	0.3	0.3	0.8	0.5	-99	0.3	0.5	0.5	0.3	0.6
2014-01-06	6	-99	0.7	0.5	-99	-99	0.7	0.5	0.5	0.3	-99	-99	0.9	-99	0.8	0.4	-99	0.4	0.6	0.9	0.7	0.5	0.4	0.7	0.7	0.5	0.9
2014-01-06	7	-99	1.2	0.8	-99	-99	0.8	0.9	0.6	1	-99	-99	1.2	-99	0.8	0.6	-99	0.7	0.9	1.4	1.5	0.9	0.7	1	1.2	1	1.5
2014-01-06	8	-99	1.2	1.4	-99	-99	1.1	1.8	0.9	1.3	-99	-99	1.6	-99	0.8	0.8	-99	0.9	1.3	2.3	1.4	1.3	1.2	1.9	1.4	1.3	2.8
2014-01-06	9	-99	1	1.5	-99	-99	1.1	1.7	1.3	1.3	-99	-99	2	-99	1.1	0.8	-99	0.6	1.7	1.6	1.7	1.4	1.1	1.8	1.2	1.3	3
2014-01-06	10	-99	0.5	0.8	-99	-99	0.8	0.8	1.1	1.3	-99	-99	1.8	-99	1.1	0.5	-99	0.5	1.4	1.4	1.2	1	0.6	1.3	1.2	0.9	1.7
2014-01-06	11	-99	0.6	0.7	-99	-99	0.9	0.7	1.1	1.2	-99	-99	1.6	-99	1	0.6	-99	0.6	1.5	1.3	1.2	1	0.5	1.1	1.4	0.6	1.3
2014-01-06	12	-99	0.7	0.9	-99	-99	-99	0.9	1.4	1.3	-99	-99	1.7	-99	0.9	0.7	-99	0.7	0.8	1.6	0.9	1.1	0.5	1	0.8	0.6	1.1
2014-01-06	13	-99	0.8	1.1	-99	-99	1	1.1	1	0.6	-99	-99	0.9	-99	0.7	0.9	-99	0.9	0.3	1.1	0.5	1.2	0.5	0.6	0.5	0.6	0.6
2014-01-06	14	-99	0.9	0.7	-99	-99	1.1	1.3	0.7	0.4	-99	-99	0.8	-99	0.5	0.3	-99	0.8	0.4	0.5	0.3	0.9	0.5	0.3	0.3	0.6	0.6
2014-01-06	15	-99	0.8	0.5	-99	-99	0.7	0.9	0.5	0.4	-99	-99	0.7	-99	0.5	0.1	-99	0.4	0.3	0.4	0.3	0.6	0.5	0.2	-99	0.6	0.6
2014-01-06	16	-99	0.8	0.4	-99	-99	0.6	0.8	0.5	0.4	-99	-99	0.6	-99	0.5	0.1	-99	0.4	0.3	0.5	0.3	0.5	0.5	0.2	-99	0.6	0.5
2014-01-06	17	-99	0.6	0.6	-99	-99	0.5	0.9	0.5	0.4	-99	-99	0.7	-99	0.5	0.1	-99	0.3	0.3	0.5	0.3	0.5	0.4	0.2	0.3	0.5	0.5
2014-01-06	18	-99	0.7	0.5	-99	-99	-99	1.1	0.5	0.4	-99	-99	0.6	-99	0.6	0.2	-99	0.3	0.4	0.5	0.3	0.7	0.4	0.2	0.5	0.4	0.6
2014-01-06	19	-99	0.8	0.6	-99	-99	0.7	0.8	0.7	0.5	-99	-99	0.9	-99	0.7	0.3	-99	0.5	0.5	0.7	0.4	0.8	0.4	0.3	0.6	0.4	0.8
2014-01-06	20	-99	0.9	0.6	-99	-99	0.8	0.9	0.7	0.7	-99	-99	1.1	-99	0.9	0.5	-99	0.5	0.7	1	0.5	0.7	0.5	0.5	0.9	0.4	0.5
2014-01-06	21	-99	0.7	0.5	-99	-99	0.8	0.7	0.7	0.5	-99	-99	0.9	-99	1	0.5	-99	0.5	0.5	0.9	0.8	-99	0.5	0.6	0.9	0.5	0.4
2014-01-06	22	-99	0.6	0.5	-99	-99	0.7	0.5	0.6	0.5	-99	-99	0.7	-99	0.8	0.4	-99	0.5	0.6	0.9	0.9	0.6	0.5	0.6	0.7	0.5	0.7
2014-01-06	23	-99	0.6	0.5	-99	-99	0.7	0.5	0.6	0.4	-99	-99	0.7	-99	0.8	0.3	-99	0.4	0.5	0.8	0.9	0.5	0.5	0.6	0.6	0.4	0.9
2014-01-06	24	-99	0.5	0.4	-99	-99	-99	0.5	0.5	0.4	-99	-99	-99	-99	0.8	0.3	-99	0.4	0.5	0.7	0.9	0.4	0.4	0.5	0.7	0.4	0.8
2014-01-07	1	-99	0.4	0.4	-99	-99	-99	0.5	0.5	0.3	-99	-99	-99	-99	0.5	0.2	-99	0.3	0.5	0.6	0.8	0.3	0.3	0.5	0.6	0.3	0.6
2014-01-07	2	-99	0.4	0.3	-99	-99	-99	0.5	0.4	0.2	-99	-99	-99	-99	0.4	0.2	-99	0.3	0.5	0.5	0.7	0.3	0.3	0.4	0.4	0.6	0.5
2014-01-07	3	-99	0.4	0.3	-99	-99	-99	0.5	0.5	0.2	-99	-99	-99	-99	0.4	0.2	-99	0.3	0.4	0.4	0.5	0.3	0.3	0.3	0.3	0.4	0.4
2014-01-07	4	-99	0.4	0.3	-99	-99	-99	0.5	0.4	0.3	-99	-99	-99	-99	0.4	0.2	-99	0.3	0.3	0.4	0.4	0.3	0.1	0.3	0.3	0.3	0.4
2014-01-07	5	-99	0.3	0.4	-99	-99	-99	0.5	0.5	0.3	-99	-99	-99	-99	0.4	0.2	-99	0.3	0.4	0.5	0.5	0.3	0.1	0.3	0.4	0.2	0.4
2014-01-07	6	-99	0.4	0.4	-99	-99	-99	0.5	0.5	0.3	-99	-99	0.5	-99	0.5	0.2	-99	0.3	0.5	0.6	0.6	0.4	0.2	0.4	0.4	0.5	0.6
2014-01-07	7	-99	0.6	0.7	-99	-99	-99	0.7	0.7	0.8	-99	-99	0.7	-99	0.6	0.4	-99	0.4	1	0.8	0.6	0.7	0.3	0.7	0.7	0.5	1
2014-01-07	8	-99	0.7	1	-99	-99	-99	1	1.2	1.2	-99	-99	1.2	-99	1	0.7	-99	0.6	1.3	1.2	0.8	1.1	0.5	0.9	1.1	0.5	1.4
2014-01-07	9	-99	0.9	1.4	-99	-99	1	1.3	1.6	1.4	-99	-99	1.4	-99	1.2	0.8	-99	0.8	0.8	1.3	1.4	1.6	0.7	0.8	1.4	0.8	1.7
2014-01-07	10	-99	0.9	1.2	-99	-99	1.2	1.6	1.7	1.6	-99	-99	1.5	-99	1.4	0.8	-99	0.9	0.8	1.4	0.9	1.4	0.5	0.7	1.4	-99	1.9
2014-01-07	11	-99	0.8	1.2	-99	-99	1.2	1.5	1.6	1.2	-99	-99	1.2	-99	1	0.8	-99	1.1	0.9	1.4	1	1.2	0.5	1.2	1.2	-99	1.1
2014-01-07	12	-99	0.8	1.3	-99	-99	1.5	1.4	1.4	0.9	-99	-99	1.2	-99	1.1	1.1	-99	1.3	0.7	1.7	1	1.3	0.6	1.4	0.9	-99	0.9
2014-01-07	13	-99	0.9	1.4	-99	-99	1.6	1.5	1.4	1	-99	-99	1.2	-99	1.2	1.2	-99	1.5	0.6	1.8	1.5	1.4	0.7	1.3	1	0.8	0.9
2014-01-07	14	-99	0.8	1.4	-99	-99	1.6	1.3	1.4	1	-99	-99	1.4	-99	1.5	1.2	-99	1.6	0.7	1.6	1.3	1.4	0.8	1	1.1	1	0.9
2014-01-07	15	-99	0.8	1.2	-99	-99	1.5	1.3	1.1	0.9	-99	-99	1.3	-99	1.5	1.1	-99	1.5	0.7	1.4	1.2	1.3	0.8	0.8	1	0.6	0.8
2014-01-07	16	-99	0.7	1.2	-99	-99	1.5	1.3	1.1	0.9	-99	-99	1.1	-99	1.1	1	-99	1.4	0.8	1.3	0.7	1.1	0.6	0.7	0.5	0.6	0.9
2014-01-07	17	-99	0.7	1.2	-99	-99	1.4	1.1	1.3	0.8	-99	-99	1.1	-99	0.9	0.9	-99	1.3	0.8	1.3	0.6	1.1	0.5	0.7	0.5	0.5	1.2
2014-01-07	18	-99	0.6	1	-99	-99	1.1	0.9	1.3	1.1	-99	-99	1.7	-99	0.9	1	-99	1.1	0.9	1.4	0.6	1	0.6	0.6	0.8	0.5	1.1
2014-01-07	19	-99	1	1	-99	-99	1.2	1	1.1	1.1	-99	-99	1.5	-99	0.8	1	-99	1	0.9	1.9	0.7	1.2	0.8	0.8	1	0.8	1.1
2014-01-07	20	-99	1.2	1	-99	-99	0.7	1.4	1	1.2	-99	-99	1.3	-99	1	0.8	-99	0.8	0.9	1.6	1.1	1.4	0.9	0.5	0.7	0.9	1.5
2014-01-07	21	-99	1.1	1.3	-99	-99	-99	1.3	1.1	1.3	-99	-99	1.3	-99	1	1	-99	0.9	1.1	1.5	1.3	1.6	1	0.7	0.9	1	1.7
2014-01-07	22	-99	0.7	1.6	-99	-99	1.3	1.3	1.2	1.5	-99	-99	1.4	-99	1.4	0.8	-99	1.2	1.3	1.8	1.2	1.3	0.9	1	1.1	0.9	1.9
2014-01-07	23	-99	0.6	1.3	-99	-99	1.5	1.5	1.7	1.8	-99	-99	1.8	-99	1.3	0.9	-99	1.3	1.4	1.3	1	1	0.9	1.1	1.3	1.2	2.4
2014-01-07	24	-99	0.8	1	-99	-99	1.3	1.6	-99	2	-99	-99	1.6	-99	1.2	-99	-99	1.1	1.6	1.5	0.9	1	0.6	1.5	1.5	1	2.5
2014-01-08	1	0.4	0.9	0.9	-99	-99	1.1	1.4	-99	2	-99	-99	1.4	-99	1.2	-99	-99	0.9	1.4	2.5	1.2	0.7	0.7	1.8	1.6	1.1	1.8
2014-01-08	2	0.3	0.8	1.2	-99	-99	0.9	1.2	-99	1.2	-99	-99	1.4	-99	0.9	-99	-99	0.7	1.5	2.1	1	0.9	0.6	1.8	1.3	1	1.9
2014-01-08	3	0.3	0.7	1.1	-99	-99	0.5	1.1	-99	0.9	-99	-99	1.1	-99	0.8	-99	-99	0.5	1.4	2.3	1	1	0.5	1.1	0.8	1	1.8
2014-01-08	4	0.3	0.8	1	-99	-99	0.4	1	-99	0.7	-99	-99	1	-99	0.8	-99	-99	0.5	0.9	1.4	1	0.8	0.4	0.9	0.7	1	1.6
2014-01-08	5	0.3	0.7	0.8	-99	-99	0.3	1	-99	0.8	-99	-99	1.1	-99	0.8	-99	-99	0.4	0.9	1.4	1.1	0.7	0.4	1.1	0.8	1	1.5
2014-01-08	6	0.5	0.8	1	-99	-99	0.6	1.3	1.1	1.3	-99	-99	1.4	-99	1	0.7	-99	0.4	1.3	1.5	1.1	1	0.6	1.3	1	1.7	1.3
2014-01-08	7	0.6	1.8	2.1	-99	-99	1.2	2.6	1.6	1.7	-99	-99	2.6	-99	2.7	0.8	-99	0.6	3.1	2.2	1.2	1.9	1.2	1.5	1.8	2	2.3
2014-01-08	8	1.1	3.5	3.7	-99	-99	2.4	3.7	2.3	3.1	-99	-99	2.7	-99	3.8	2	-99	1.1	4.1	3	2.5	3.8	2	1.8	3	3	3.6
2014-01-08	9	1	4.1	3.2	-99	-99	1.4	3.5	2.6	3.2	-99	-99	2.7	-99	4.3	2.1	-99	0.8	2.2	1.9	1.9	3.4	2	1.8	2.6	3.5	3.6
2014-01-08	10	0.6	2.1	2.8	-99	-99	1.4	2.2	2.4	2.7	-99	-99	2	-99	2.7	2	-99	1.1	1.4	1.8	1.7	3	1.8	1.4	2.4	3.4	3.5
2014-01-08	11	0.5	1.7	2.3	-99	-99	1.1	2.2	2.1	2.4	-99	-99	1.9	-99	1.6	1.2	-99	1.1	1.2	1.4	-99	2.1	1.2	1.1	2.6	2.3	-99
2014-01-08	12	0.4	1.1	1.3	-99	-99	0.9	1.4	1.3	1.5	-99	-99	1.3	-99	1.2	0.7	-99	1.1	1	1.2	-99	1.1	1	1	2	1.3	-99
2014-01-08	13	0.3	1	1	-99	-99	1	1.2	1.1	0.9	-99	-99	0.8	-99	0.8	0.7	-99	1	0.5	1.1	-99	1	1	0.7	0.7	0.5	-99
2014-01-08	14	0.2	1.1	0.8	-99	-99	0.9	1.1	0.8	0.7	-99	-99	0.8	-99	0.9	0.6	-99	0.8	0.4	1	0.4	1	0.7	0.7	0.7	0.7	0.5
2014-01-08	15	0.2	1	0.8	-99	-99	0.8	1.3	0.9	0.8	-99	-99	1	-99	0.9	0.5	-99	0.8	0.5	0.8	0.5	1	0.6	0.6	0.8	0.7	0.8
2014-01-08	16	0.3	0.9	0.9	-99	-99	0.8	1.2	0.8	0.7	-99	-99	1.1	-99	0.7	0.5	-99	0.8	0.6	0.8	0.4	1	0.5	0.5	0.7	0.7	-99
2014-01-08	17	0.3	0.9	0.8	-99	-99	0.5	1.1	0.8	0.6	-99	-99	1	-99	0.6	0.6	-99	0.5	0.7	0.7	0.2	1	0.5	0.4	0.6	0.6	0.9
2014-01-08	18	0.5	0.9	0.6	-99	-99	0.5	1.3	0.9	0.8	-99	-99	1.3	-99	1	0.6	-99	0.4	0.7	1.4	0.2	0.9	0.6	0.4	1	0.8	1
2014-01-08	19	0.2	1	1	-99	-99	0.8	1.9	1.2	1.3	-99	-99	1.2	-99	1.3	0.6	-99	0.9	0.9	1.5	0.2	1.1	0.7	0.4	1.4	1	1.4
2014-01-08	20	0.4	0.9	2	-99	-99	0.9	1.4	2.3	2.1	-99	-99	2.7	-99	1.4	0.8	-99	0.6	1.3	1.5	0.5	1.7	1.1	0.6	1.1	1.1	1.8
2014-01-08	21	0.4	1.2	1.8	-99	-99	0.9	1.8	3.2	1.8	-99	-99	3	-99	1.6	0.4	-99	0.4	1.6	2.1	0.7	-99	1.4	0.6	0.8	1.2	2.1
2014-01-08	22	0.2	0.7	1.4	-99	-99	0.5	2.1	1.6	1.9	-99	-99	2.3	-99	1.5	0.8	-99	0.4	2.1	3.4	0.9	1.7	0.8	0.8	1.3	1.2	3
2014-01-08	23	0.3	0.7	1	-99	-99	0.7	0.6	0.8	0.9	-99	-99	1.3	-99	1.8	1.1	-99	0.6	1.3	2.6	1.5	0.9	0.4	1.3	2	0.5	2.3
2014-01-08	24	-99	0.5	0.8	-99	-99	0.6	0.8	0.6	0.6	-99	-99	1	-99	1.4	0.5	-99	0.5	0.8	2.5	0.7	0.7	0.5	1.4	1.1	0.5	-99
2014-01-09	1	-99	0.7	0.8	-99	-99	0.8	1	0.7	0.6	-99	-99	0.9	-99	1.3	0.3	-99	0.4	1	1.9	0.7	0.9	0.5	1	1.3	0.5	-99
2014-01-09	2	-99	0.6	0.7	-99	-99	0.3	0.6	0.8	0.9	-99	-99	1.2	-99	1.7	0.3	-99	0.3	1.2	1.4	0.9	0.5	0.4	0.7	1.3	1	-99
2014-01-09	3	-99	0.6	0.6	-99	-99	0.3	0.5	1.1	0.7	-99	-99	1.5	-99	1.6	0.2	-99	0.2	0.7	1.1	0.6	0.4	0.3	0.8	0.6	0.8	-99
2014-01-09	4	-99	0.5	0.6	-99	-99	0.3	0.5	1	0.7	-99	-99	1.3	-99	1.2	0.3	-99	0.2	0.9	0.9	0.3	0.6	0.7	0.6	0.7	0.6	-99
2014-01-09	5	-99	0.4	0.7	-99	-99	0.4	0.5	0.8	0.6	-99	-99	1.7	-99	1.4	0.2	-99	0.2	0.8	0.9	0.4	0.5	0.7	0.6	0.7	0.6	-99
2014-01-09	6	0.2	0.7	1.1	-99	-99	0.4	0.8	1.2	0.9	-99	-99	1.7	-99	1.3	0.2	-99	0.3	1.5	1.1	0.5	0.7	0.7	0.8	0.8	0.9	2.2
2014-01-09	7	0.5	1.8	1.4	-99	-99	1.1	1.5	2.1	3.3	-99	-99	2.4	-99	2.1	0.4	-99	0.4	3.1	2.4	0.3	1.6	1.1	1.4	1.8	1.6	3.3
2014-01-09	8	0.7	3.3	2.5	-99	-99	1.4	3.1	3.2	4.2	-99	-99	2.6	-99	4	1	-99	0.7	3.3	3.3	1.3	3	2.3	1.7	2.9	2.8	4.5
2014-01-09	9	0.8	3.1	3.1	-99	-99	0.9	3.2	3.2	3.4	-99	-99	2.8	-99	4.9	1.1	-99	0.7	2.5	2	1.1	3.3	2.5	1.8	3.3	2.7	5.4
2014-01-09	10	0.7	1.9	2.6	-99	-99	0.5	2.6	3.3	3	-99	-99	2.2	-99	3.4	1.3	-99	0.9	1.4	1.8	1.3	1.9	2.7	1.1	2.4	1.9	3.5
2014-01-09	11	0.5	1.5	2.1	-99	-99	0.6	3.2	2.3	2.2	-99	-99	2.1	-99	1.9	1.3	-99	0.8	-99	1.6	0.6	1.6	2.1	-99	2.1	2.4	2.2
2014-01-09	12	0.3	1.1	1.1	-99	-99	0.8	1.8	1.4	1.2	-99	-99	1	-99	1	0.7	-99	0.7	0.5	1.6	0.5	1.3	1.2	-99	-99	1.6	1.2
2014-01-09	13	0.1	1.2	0.8	-99	-99	0.8	1.3	0.6	0.5	-99	-99	0.6	-99	0.5	0.8	-99	1	0.3	1.3	0.4	1	0.8	-99	0.6	0.9	0.6
2014-01-09	14	0	1	0.7	-99	-99	1.1	1.3	0.5	0.4	-99	-99	0.5	-99	0.7	0.7	-99	1	0.2	1	0.3	1	0.6	-99	0.6	0.8	0.4
2014-01-09	15	0.1	0.8	0.7	-99	-99	0.7	1	0.6	0.5	-99	-99	0.6	-99	0.8	0.5	-99	0.6	0.3	0.9	0.3	0.8	0.5	0.5	0.6	0.7	0.6
2014-01-09	16	0.1	0.6	0.5	-99	-99	0.4	0.7	0.6	0.5	-99	-99	0.9	-99	0.6	0.4	-99	0.2	0.4	0.7	0.2	0.5	0.3	0.5	0.6	0.6	0.4
2014-01-09	17	0.2	0.4	0.5	-99	-99	0.4	0.6	0.5	0.6	-99	-99	0.9	-99	0.7	0.4	-99	0.3	0.5	0.6	0.1	0.5	0.2	0.4	0.6	0.5	0.6
2014-01-09	18	0.3	0.7	0.4	-99	-99	0.4	0.8	0.7	0.6	-99	-99	1	-99	0.9	0.3	-99	0.3	0.4	0.7	0.2	0.6	0.3	0.4	0.8	0.8	0.6
2014-01-09	19	0.2	0.5	0.7	-99	-99	0.7	1.5	0.8	0.8	-99	-99	1.2	-99	1.1	0.4	-99	0.6	0.7	0.8	0.2	1	0.5	0.5	1.1	2	1
2014-01-09	20	0.2	0.4	0.8	-99	-99	0.7	1.1	1.2	1.2	-99	-99	1.4	-99	1.3	0.3	-99	0.4	1	1.1	0.5	0.9	0.6	0.6	1	2.2	1.1
2014-01-09	21	0.2	0.7	0.9	-99	-99	0.5	0.8	1.8	1.6	-99	-99	1.6	-99	1.6	0.2	-99	0.3	1	1.8	0.7	0.9	-99	0.6	1.1	2.1	1.4
2014-01-09	22	0.3	1.2	2.1	-99	-99	0.5	1.2	1.6	1.6	-99	-99	1.6	-99	1.5	0.8	-99	0.3	1.7	2.1	0.9	1.1	-99	0.6	1.6	2.1	2.2
2014-01-09	23	0.3	1.7	3.1	-99	-99	0.8	1.4	1.7	1.7	-99	-99	2.7	-99	1.2	1.4	-99	0.5	2	2	0.8	1.7	-99	0.8	1.1	2.3	2.1
2014-01-09	24	0.4	1.6	3.6	-99	-99	0.6	1.3	1.7	1.9	-99	-99	4	-99	1.1	1.5	-99	0.4	3	4.1	1.3	1.5	0.8	-99	1	2.3	1.9
2014-01-10	1	0.2	1	4.7	-99	-99	0.3	1.2	2.4	1.2	-99	-99	2	-99	1.1	1.2	-99	0.3	2.7	4.1	1	1.5	0.7	-99	0.8	2.2	2.2
2014-01-10	2	0.1	1	3.3	-99	-99	0.2	0.8	2.2	1.1	-99	-99	1.9	-99	1.6	1.3	-99	0.2	2.7	2.2	0.6	1	1.1	-99	0.7	2	1.5
2014-01-10	3	0.1	0.8	3.2	-99	-99	0.4	1	2.3	1.2	-99	-99	2	-99	0.9	1.3	-99	0.6	1.8	1.1	0.4	1	1.1	-99	0.9	1.5	0.9
2014-01-10	4	0.1	0.9	3	-99	-99	0.5	1.4	2.3	1.2	-99	-99	1.9	-99	0.7	1.1	-99	0.7	0.8	1.1	0.3	0.9	1	-99	1.4	1	0.9
2014-01-10	5	0	0.9	2.8	-99	-99	0.2	1.5	2.1	1.4	-99	-99	1.9	-99	0.6	1.1	-99	0.5	1.2	1.7	0.3	0.8	0.9	-99	1.4	0.7	1.6
2014-01-10	6	0.2	1	2.6	-99	-99	0.3	1.4	3	2.4	-99	-99	3	-99	1.2	0.9	-99	0.5	2.3	2.1	0.4	1.4	0.9	0.9	1.8	0.9	2.9
2014-01-10	7	0.4	1.3	2.9	-99	-99	1.1	2.1	3	4	-99	-99	5.4	-99	1.9	0.9	-99	0.7	2.8	3.3	0.4	2	1.1	1.3	2.6	1.6	5
2014-01-10	8	0.8	2	3.8	-99	-99	1.7	4	4.8	7.4	-99	-99	7.5	-99	2.3	1.7	-99	0.9	4.8	5.6	1	3.3	1.5	4.1	4	2.7	5.9
2014-01-10	9	0.6	2.6	3.2	-99	-99	1.2	3.6	5	5.9	-99	-99	5.5	-99	2.6	1.5	-99	0.9	2.4	4.2	1.8	3.7	2	3	3	3.2	5.7
2014-01-10	10	0.3	2.5	2.2	-99	-99	1.3	3.7	4.1	2.7	-99	-99	3.4	-99	2.6	1.2	-99	1.1	2.6	2.2	0.8	2.4	1.9	1.9	2.1	2.6	2.8
2014-01-10	11	0.2	1.6	1.9	-99	-99	0.8	2.7	-99	1.3	-99	-99	1.7	-99	1.7	1	-99	1	1	1.6	0.4	2	1	1.2	1.2	2.1	1.3
2014-01-10	12	0.1	1.2	1.2	-99	-99	0.5	1.7	-99	0.4	-99	-99	0.6	-99	0.5	0.3	-99	0.7	0.4	0.5	0.3	1.4	0.7	0.4	0.4	1.2	0.7
2014-01-10	13	0.1	1	0.5	-99	-99	0.3	1	-99	0.4	-99	-99	0.5	-99	0.4	0.2	-99	0.4	0.3	0.3	0.1	0.6	0.5	0.3	0.4	0.6	0.5
2014-01-10	14	0	0.7	0.4	-99	-99	0.3	0.6	0.4	0.3	-99	-99	0.4	-99	0.4	0.1	-99	0.2	0.3	0.4	0.1	0.5	0.3	0.3	0.4	0.6	0.5
2014-01-10	15	0	1	0.5	-99	-99	0.4	0.5	0.5	0.3	-99	-99	0.6	-99	0.4	0.1	-99	0.3	0.3	0.4	0.1	0.5	0.5	0.3	0.3	0.7	0.5
2014-01-10	16	0	0.3	0.7	-99	-99	0.4	0.5	0.6	0.3	-99	-99	0.8	-99	0.4	0.1	-99	0.3	0.4	0.4	0.1	0.4	0.3	0.3	0.3	1	0.6
2014-01-10	17	0.2	0.4	0.5	-99	-99	0.4	0.5	0.6	0.3	-99	-99	0.6	-99	0.5	0.2	-99	0.3	0.3	0.5	0.1	0.5	0.2	0.4	0.3	0.5	0.7
2014-01-10	18	0.4	0.5	0.5	-99	-99	0.6	0.6	0.6	0.4	-99	-99	0.9	-99	0.7	0.2	-99	0.4	0.5	0.6	0.1	0.6	0.3	0.4	0.7	0.6	0.8
2014-01-10	19	0.4	0.4	0.7	-99	-99	0.5	0.6	0.7	0.6	-99	-99	1.3	-99	1	0.3	-99	0.5	0.7	0.8	0.2	0.7	0.4	0.5	1.1	1.1	0.9
2014-01-10	20	0.2	0.6	0.7	-99	-99	0.7	1.2	0.8	0.6	-99	-99	1.3	-99	1.1	0.4	-99	0.6	0.8	0.8	0.4	0.9	0.6	0.5	1.1	1.3	1.1
2014-01-10	21	0.3	1.2	0.8	-99	-99	0.8	1.5	1.3	1.3	-99	-99	1.5	-99	1.2	0.6	-99	0.7	1.3	1	0.5	1.3	0.7	0.7	1.1	3	1.3
2014-01-10	22	0.6	1.4	2.6	-99	-99	0.8	1.8	1.5	1.7	-99	-99	1.9	-99	1.2	1.3	-99	0.9	2.2	1.6	0.8	2.3	1.7	1	1.8	2.7	2.1
2014-01-10	23	0.5	1.9	2.3	-99	-99	1.2	1.3	1.6	1.8	-99	-99	3.6	-99	1.2	1.4	-99	0.8	2.7	2.7	1.1	2.3	1.4	1.2	1.7	3	1.8
2014-01-10	24	0.7	1.9	2.5	-99	-99	0.5	1.4	2.3	2	-99	-99	4.2	-99	2.6	0.8	-99	0.5	2.3	3.5	2	1.9	1.4	1.6	1.6	3.2	2.4
2014-01-11	1	0.4	1.7	2.2	-99	-99	0.4	1.2	2.7	2.2	-99	-99	3.5	-99	2.8	0.3	-99	0.4	2.1	2.8	0.8	1.2	1.2	1.3	1.9	2.7	3.1
2014-01-11	2	0.4	0.9	2	-99	-99	0.3	1	2.4	1.7	-99	-99	3.4	-99	3	0.2	-99	0.3	2.1	1.8	0.8	1.8	1.9	1	1.3	1.7	2.6
2014-01-11	3	0.2	0.5	1.5	-99	-99	0.4	0.9	2.1	1.4	-99	-99	3.1	-99	2.9	0.3	-99	0.3	1.4	1.8	0.9	1.6	1.3	1.1	1.5	1.7	1.3
2014-01-11	4	0.3	0.8	1.1	-99	-99	0.5	0.7	2.3	1.3	-99	-99	2.8	-99	2.1	0.3	-99	0.3	1.4	1.9	0.7	1.3	1.2	0.9	0.8	1.5	2.3
2014-01-11	5	0.2	0.7	0.8	-99	-99	0.5	0.8	2.2	1.3	-99	-99	2.9	-99	1.6	0.3	-99	0.4	1.8	1.5	0.6	1	1.4	0.8	0.8	1.6	2
2014-01-11	6	0.3	0.7	1	-99	-99	0.7	1	2	1.3	-99	-99	3.3	-99	2.1	0.3	-99	0.6	1.2	1.9	0.7	0.8	1	0.7	1.2	1.3	1.9
2014-01-11	7	0.4	1.3	1.3	-99	-99	1.2	1.4	2.2	2.1	-99	-99	3.7	-99	1.6	0.3	-99	0.7	1.9	1.8	0.9	1.4	1.3	1	1.6	1.7	3.4
2014-01-11	8	0.6	1.6	1.7	-99	-99	1	2.8	3.1	3.5	-99	-99	4	-99	1.7	0.7	-99	1.2	2.4	2.2	0.8	1.4	2.5	1.9	3	2.3	3.3
2014-01-11	9	0.6	2.4	2.2	-99	-99	1.2	3	2.2	2	-99	-99	3.1	-99	2.8	1	-99	1.1	2.1	3	4	1.9	1.1	2.1	2.1	2.4	3.4
2014-01-11	10	0.6	1.6	2.5	-99	-99	0.6	2.6	2	1.6	-99	-99	2.6	-99	3.1	1.3	-99	0.6	1.8	2.5	2.4	2.2	1.1	1.6	2	2	2.7
2014-01-11	11	0.1	0.6	1.1	-99	-99	0.6	1.2	1.3	1	-99	-99	1.4	-99	1.8	0.7	-99	0.5	0.9	1.1	0.8	1.5	0.6	0.9	1.8	0.8	1.8
2014-01-11	12	0.1	0.5	0.7	-99	-99	0.6	0.8	0.9	0.7	-99	-99	1.3	-99	0.9	0.5	-99	0.6	0.8	0.9	0.8	0.8	0.3	0.7	1.3	0.3	0.7
2014-01-11	13	0	0.4	0.6	-99	-99	0.6	0.7	0.9	0.5	-99	-99	1	-99	0.5	0.5	-99	0.6	0.2	0.9	0.5	0.7	0.1	0.6	1.1	0.3	0.4
2014-01-11	14	0	0.4	0.4	-99	-99	0.6	0.6	0.4	0.3	-99	-99	0.5	-99	0.4	0.6	-99	0.6	0.3	0.8	0.4	0.6	0.1	0.4	1	0.2	0.4
2014-01-11	15	0	0.4	0.5	-99	-99	0.8	0.7	0.4	0.3	-99	-99	0.6	-99	0.5	0.5	-99	0.6	0.3	0.6	0.3	0.7	0	0.4	0.9	0.2	0.3
2014-01-11	16	0.1	0.4	0.5	-99	-99	0.6	0.7	0.4	0.3	-99	-99	0.9	-99	0.5	0.4	-99	0.4	0.3	0.7	0.3	0.5	0	0.5	0.6	0.3	0.3
2014-01-11	17	0	0.5	0.4	-99	-99	0.8	0.9	0.4	0.5	-99	-99	0.5	-99	0.6	0.4	-99	0.7	0.3	0.8	0.4	0.8	0.1	0.5	0.5	0.3	0.4
2014-01-11	18	0	0.5	0.6	-99	-99	0.7	0.6	0.4	0.5	-99	-99	0.6	-99	0.6	0.4	-99	0.5	0.3	0.8	0.4	0.6	0.1	0.5	-99	0.4	0.4
2014-01-11	19	0	0.6	0.6	-99	-99	0.5	0.5	0.5	0.5	-99	-99	0.6	-99	0.5	0.3	-99	0.4	0.3	0.7	0.4	0.7	0.1	0.4	-99	0.3	0.5
2014-01-11	20	0	0.5	0.7	-99	-99	0.5	0.5	0.5	0.4	-99	-99	0.8	-99	0.8	0.3	-99	0.4	0.3	0.9	0.5	0.7	0.2	0.6	0.4	0.3	0.4
2014-01-11	21	0	0.6	0.6	-99	-99	0.5	0.5	0.6	0.6	-99	-99	0.9	-99	0.8	0.2	-99	0.4	0.3	0.7	0.6	0.5	0.3	0.6	0.4	0.4	0.2
2014-01-11	22	0	0.7	0.5	-99	-99	0.4	0.5	0.5	0.5	-99	-99	0.8	-99	0.9	0.2	-99	0.3	0.4	0.7	0.6	0.6	0.2	0.6	0.6	0.3	0.3
2014-01-11	23	0	0.6	0.6	-99	-99	0.4	0.4	0.4	0.4	-99	-99	0.7	-99	1.1	0.2	-99	0.3	0.5	0.6	0.5	0.6	0.2	0.5	0.5	0.3	0.3
2014-01-11	24	0	0.5	0.5	-99	-99	0.4	0.4	0.4	0.3	-99	-99	0.6	-99	0.9	0.2	-99	-99	0.5	0.5	0.5	0.4	0.2	0.4	0.4	0.4	0.8
2014-01-12	1	0	0.4	0.4	-99	-99	0.7	0.4	0.3	0.2	-99	-99	0.5	-99	0.8	0.2	-99	-99	0.4	0.5	0.4	0.4	0.1	0.4	-99	0.4	0.9
2014-01-12	2	0	0.4	0.4	-99	-99	0.5	0.6	0.3	0.2	-99	-99	0.4	-99	0.7	0.3	-99	-99	0.4	0.6	0.2	0.4	0.2	0.6	-99	0.5	0.8
2014-01-12	3	0	0.3	0.6	-99	-99	0.4	0.6	0.4	0.3	-99	-99	0.5	-99	0.8	0.3	-99	-99	0.4	0.7	0.2	0.6	0.2	0.7	-99	0.5	0.9
2014-01-12	4	0.1	0.3	0.8	-99	-99	0.4	0.6	0.5	0.4	-99	-99	0.5	-99	0.8	0.3	-99	-99	0.5	0.8	0.5	0.7	0.2	0.7	0.4	0.6	1
2014-01-12	5	0.2	0.4	0.9	-99	-99	0.5	0.6	0.5	0.4	-99	-99	0.6	-99	0.8	0.2	-99	-99	0.9	0.8	0.2	0.5	0.2	0.7	0.6	0.8	0.8
2014-01-12	6	0.1	0.5	0.8	-99	-99	0.5	0.6	0.6	0.6	-99	-99	1	-99	1.1	0.3	-99	0.3	0.8	0.9	0.5	0.6	0.3	0.6	0.5	0.8	0.8
2014-01-12	7	0.2	0.9	1.1	-99	-99	0.7	1.1	1.1	1.3	-99	-99	1.6	-99	1.3	0.4	-99	0.3	1.3	0.9	0.8	0.7	0.4	0.8	1	0.9	1.3
2014-01-12	8	0.6	1.1	1.4	-99	-99	1.1	1.4	1.5	1.7	-99	-99	1.8	-99	2	0.6	-99	0.4	2.2	1.2	0.8	1.2	1.1	0.8	1.6	1.2	1.8
2014-01-12	9	0.6	0.9	1.3	-99	-99	1.2	1.5	1.3	1.7	-99	-99	2	-99	2.8	0.9	-99	0.4	1.1	1	1	1.3	1.2	0.8	1.4	1.5	2.2
2014-01-12	10	0.4	1	1.7	-99	-99	0.9	1.8	1.4	1.8	-99	-99	1.3	-99	1.8	0.5	-99	0.4	0.9	0.9	0.5	0.9	0.9	0.7	1	1.1	1.3
2014-01-12	11	0.3	0.8	1.2	-99	-99	0.7	1.7	1.6	1.2	-99	-99	1.2	-99	1.3	0.6	-99	0.6	0.5	0.8	0.4	1	0.7	0.7	1.5	1	1.1
2014-01-12	12	0.2	0.9	1.1	-99	-99	0.7	1.6	1.4	0.9	-99	-99	1.4	-99	1	0.6	-99	0.7	0.7	0.8	0.4	1.2	0.6	0.6	1.4	1	0.9
2014-01-12	13	0.1	1	1	-99	-99	0.7	1.4	1	0.7	-99	-99	1	-99	0.6	0.5	-99	0.6	0.5	0.6	0.2	1.1	0.6	0.4	1.1	0.8	0.7
2014-01-12	14	0.1	-99	0.6	-99	-99	0.6	1.1	0.5	0.3	-99	-99	0.4	-99	0.4	0.2	-99	0.3	0.3	0.4	0.1	0.7	0.2	0.3	0.8	0.6	0.5
2014-01-12	15	0.1	0.5	0.4	-99	-99	0.4	0.6	0.3	0.3	-99	-99	0.4	-99	0.4	0.1	-99	0.2	0.3	0.3	0.1	0.5	0	0.3	0.8	0.4	0.3
2014-01-12	16	0	0.3	0.3	-99	-99	0.3	0.6	0.3	0.2	-99	-99	0.3	-99	0.4	0.1	-99	0.2	0.3	0.3	0.2	0.3	0	0.3	0.9	0.3	0.3
2014-01-12	17	0	0.3	0.4	-99	-99	0.4	0.5	0.3	0.2	-99	-99	0.3	-99	0.4	0.1	-99	0.2	0.3	0.3	0.2	0.3	0	0.2	0.9	0.3	0.4
2014-01-12	18	0.1	0.4	0.4	-99	-99	0.4	0.5	0.4	0.3	-99	-99	0.4	-99	0.5	0.1	-99	0.3	0.3	0.4	0.2	0.4	0	0.3	0.9	0.4	0.4
2014-01-12	19	0.1	0.5	0.6	-99	-99	0.6	0.8	0.5	0.8	-99	-99	0.5	-99	0.6	0.3	-99	0.3	0.4	0.5	0.2	0.6	0	0.4	0.8	0.5	0.7
2014-01-12	20	0.2	0.8	1.2	-99	-99	0.6	0.9	0.7	1	-99	-99	0.7	-99	0.9	0.9	-99	0.3	0.8	0.7	0.3	0.7	0.1	0.4	0.9	0.6	1.1
2014-01-12	21	0.2	1.3	0.9	-99	-99	0.5	0.8	1	1.3	-99	-99	1.1	-99	0.9	1.1	-99	0.3	1.2	1.9	0.9	0.8	0.4	0.5	0.8	1	1.5
2014-01-12	22	0.3	1.2	0.5	-99	-99	0.4	1.1	1.4	1.7	-99	-99	1.8	-99	1.1	1	-99	0.3	1.1	3	0.7	2.1	0.5	0.8	0.8	1.7	1.4
2014-01-12	23	0.6	0.9	0.9	-99	-99	0.4	1.6	1.7	1.8	-99	-99	1.7	-99	1	0.5	-99	0.3	1.2	2.5	0.5	1.7	0.7	0.7	0.8	2	1.4
2014-01-12	24	0.6	0.8	1.7	-99	-99	0.4	1.4	2	2	-99	-99	1.8	-99	1.1	0.4	-99	0.3	1.6	2.4	0.2	-99	0.8	0.7	1	2.6	1.3
2014-01-13	1	0.4	0.3	1.2	-99	-99	0.3	0.8	1.7	1.3	-99	-99	2.2	-99	1.4	0.6	-99	0.3	1.5	2.4	0.6	-99	1	0.7	0.8	1.5	1.4
2014-01-13	2	0.3	0.3	0.8	-99	-99	0.3	0.7	2.1	0.8	-99	-99	1.6	-99	1.3	0.3	-99	0.2	1.8	-99	0.4	-99	0.5	0.7	0.7	1.3	1.3
2014-01-13	3	0.2	0.3	0.8	-99	-99	0.3	0.7	1.1	0.5	-99	-99	1.3	-99	1.2	0.2	-99	0.2	1.5	-99	0.3	-99	0.3	0.6	0.4	1	0.8
2014-01-13	4	0.1	0.3	0.9	-99	-99	0.3	0.6	0.9	0.7	-99	-99	1.1	-99	0.7	0.1	-99	0.2	1	1.6	0.3	-99	0.2	0.6	0.5	0.9	1.2
2014-01-13	5	0.1	0.4	0.7	-99	-99	0.3	0.6	0.9	1	-99	-99	1.8	-99	0.6	0.1	-99	0.2	1.3	1.5	0.3	-99	0.4	0.5	1.1	0.8	1.4
2014-01-13	6	0.2	0.5	0.8	-99	-99	0.4	0.8	1.6	1.1	-99	-99	1.2	-99	0.9	0.2	-99	0.4	1	1	0.4	0.9	0.4	0.6	0.8	0.8	1.6
2014-01-13	7	0.5	1.3	1	-99	-99	1	2.5	1.8	2.7	-99	-99	2.1	-99	2	0.5	-99	0.7	2.7	1.9	0.5	1.6	0.7	1.4	1.9	1.6	2.2
2014-01-13	8	0.9	2.6	2.8	-99	-99	1.4	3.2	3	3.3	-99	-99	3.2	-99	5.1	1.1	-99	0.9	3.5	4.3	1.4	3.3	2.1	1.8	2.9	2.8	3
2014-01-13	9	0.9	2.4	2.8	-99	-99	0.9	3.9	3	2.4	-99	-99	3.3	-99	5.4	1.2	-99	0.8	2.2	3.8	1.3	3.2	1.4	2	3	3.8	4.2
2014-01-13	10	0.5	2	1.9	-99	-99	0.7	3.7	2.5	2.7	-99	-99	2.9	-99	3.4	1.6	-99	0.7	1.8	1.5	1.2	2.4	1.1	1.3	1.6	3.1	2.9
2014-01-13	11	0.2	1	1.3	-99	-99	1	1.7	2.1	1.5	-99	-99	1.4	-99	1	0.6	-99	0.9	0.9	1.2	0.7	1.5	0.6	0.9	1.2	0.5	1.5
2014-01-13	12	0.1	0.9	1.6	-99	-99	-99	1.7	1.6	0.8	-99	-99	1.1	-99	0.6	0.6	-99	0.8	0.7	1.3	0.8	1	0.3	1	0.5	0.4	1.2
2014-01-13	13	0.1	0.9	1.1	-99	-99	-99	1.7	0.9	0.5	-99	-99	0.9	-99	0.5	0.6	-99	0.7	0.6	1.3	0.6	0.9	0.3	0.6	0.6	0.7	1
2014-01-13	14	0.1	0.9	0.9	-99	-99	-99	1.4	0.7	0.5	-99	-99	0.7	-99	0.6	0.6	-99	0.7	0.5	1	0.6	1	-99	0.5	0.9	0.7	0.6
2014-01-13	15	0.2	0.7	0.8	-99	-99	-99	1.1	0.7	0.6	-99	-99	0.8	-99	0.6	0.5	-99	0.8	0.5	0.9	0.6	1	-99	0.6	0.8	0.6	0.7
2014-01-13	16	0.2	0.5	0.9	-99	-99	-99	1.2	0.9	0.6	-99	-99	1	-99	0.7	0.5	-99	0.7	0.6	1	0.5	0.9	-99	0.6	0.8	0.4	0.8
2014-01-13	17	0.2	0.5	0.9	-99	-99	1	1	0.9	0.7	-99	-99	1.3	-99	0.8	0.5	-99	0.7	0.8	1	0.4	0.9	-99	0.7	0.8	0.2	0.8
2014-01-13	18	0.2	0.5	0.8	-99	-99	1	0.8	0.8	0.9	-99	-99	1	-99	1	0.5	-99	0.8	0.6	1.2	0.4	0.7	-99	0.9	0.9	0.3	0.5
2014-01-13	19	0.2	0.6	0.8	-99	-99	0.7	0.9	0.6	0.5	-99	-99	1.3	-99	1.2	0.6	-99	0.6	0.5	1.5	0.3	1	-99	1.2	1.3	0.5	0.3
2014-01-13	20	0.1	1	1	-99	-99	0.8	0.9	0.8	0.6	-99	-99	1	-99	1	0.6	-99	0.6	0.4	1.4	1.1	0.8	-99	0.9	1.4	0.5	0.5
2014-01-13	21	0.1	0.6	0.6	-99	-99	0.7	0.7	0.5	0.6	-99	-99	0.6	-99	0.9	0.5	-99	0.4	0.4	1	1.1	0.5	-99	0.6	0.7	0.3	0.5
2014-01-13	22	0	0.5	0.5	-99	-99	0.5	0.5	0.5	0.4	-99	-99	0.6	-99	0.6	0.3	-99	0.4	0.3	1	0.8	0.5	-99	0.6	0.5	0.3	0.4
2014-01-13	23	0	0.5	0.4	-99	-99	0.5	0.5	0.4	0.4	-99	-99	0.5	-99	0.5	0.2	-99	0.3	0.2	0.8	0.4	0.3	-99	0.5	0.3	0.2	0.2
2014-01-13	24	0	0.3	0.3	-99	-99	-99	0.4	0.3	0.1	-99	-99	-99	-99	0.5	0.1	-99	0.3	0.1	0.5	0.3	0.3	-99	0.4	0.1	0.1	0.1
2014-01-14	1	0	0.4	0.3	-99	-99	-99	0.3	0.2	0.1	-99	-99	-99	-99	0.3	0.1	-99	0.2	0.1	0.5	0.2	0.3	-99	0.3	0	0.1	0.2
2014-01-14	2	0	0.3	0.2	-99	-99	-99	0.4	0.2	0.1	-99	-99	-99	-99	0.3	0.1	-99	0.2	0.1	0.4	0.2	0.2	-99	0.3	0.1	0.1	0.1
2014-01-14	3	0	0.3	0.2	-99	-99	-99	0.4	0.2	0.1	-99	-99	-99	-99	0.3	0.1	-99	0.2	0.1	0.4	0.2	0.2	-99	0.3	0.1	0	0.1
2014-01-14	4	0	0.2	0.2	-99	-99	-99	0.4	0.2	0.1	-99	-99	-99	-99	0.2	0.1	-99	0.2	0.1	0.4	0.2	0.2	-99	0.3	0.1	0.1	0.2
2014-01-14	5	0	0.3	0.2	-99	-99	-99	0.4	0.2	0.1	-99	-99	-99	-99	0.3	0.1	-99	0.2	0.2	0.4	0.2	0.2	-99	0.4	0.2	0.1	0.4
2014-01-14	6	0	0.4	0.3	-99	-99	0.3	0.5	0.2	0.3	-99	-99	0.5	-99	0.4	0.2	-99	0.3	0.3	0.5	0.4	0.3	-99	0.5	0.3	0.2	1.1
2014-01-14	7	0	0.5	0.5	-99	-99	0.4	0.6	0.4	0.8	-99	-99	0.8	-99	0.6	0.3	-99	0.3	0.6	0.9	0.4	0.8	-99	0.7	0.5	0.3	1.1
2014-01-14	8	0.1	1.1	1.1	-99	-99	0.6	1.1	0.7	1.2	-99	-99	1.4	-99	1	0.5	-99	0.4	1.5	1.2	0.5	1.2	-99	0.8	0.9	0.7	2
2014-01-14	9	0.1	1.5	1.1	-99	-99	0.7	1.1	1	1.2	-99	-99	1.5	-99	1	0.6	-99	0.6	1.9	1.3	1	1.4	-99	1.2	1.4	0.9	1.8
2014-01-14	10	0.1	0.7	1.1	-99	-99	0.8	0.9	1	1.1	-99	-99	1.5	-99	0.9	0.6	-99	0.8	1.4	1.3	0.7	1.2	-99	1	0.9	0.6	1.7
2014-01-14	11	0	0.7	0.9	-99	-99	1	1.1	1.4	1.2	-99	-99	1.6	-99	0.7	-99	-99	0.8	1	1.6	0.7	1.3	-99	1	0.9	0.3	1.4
2014-01-14	12	0	0.9	1	-99	-99	0.9	1.3	1.4	1	-99	-99	1.5	-99	0.7	-99	-99	0.9	-99	1.5	0.5	1.4	-99	1	0.8	0.4	1.3
2014-01-14	13	0.1	1	1.2	-99	-99	1	1.3	1.2	0.7	-99	-99	0.8	-99	0.8	-99	-99	1	-99	1.3	0.3	1.2	-99	0.9	0.9	0.5	0.8
2014-01-14	14	0.1	1.1	1	-99	-99	1.1	1.5	0.9	0.7	-99	-99	1	-99	0.7	0.6	-99	0.9	-99	-99	0.2	1.2	-99	0.6	0.9	0.7	0.5
2014-01-14	15	0.2	1.1	0.9	-99	-99	1.1	1.4	0.8	0.6	-99	-99	0.9	-99	0.5	0.4	-99	0.8	-99	-99	0.3	1	-99	0.5	0.7	0.6	0.6
2014-01-14	16	0.2	0.9	1	-99	-99	1	1.4	0.9	0.4	-99	-99	0.8	-99	0.5	0.3	-99	0.8	0.4	-99	0.2	1.1	-99	0.4	0.6	0.6	0.8
2014-01-14	17	0.1	0.6	0.8	-99	-99	0.4	0.9	0.8	0.6	-99	-99	0.9	-99	0.7	0.5	-99	0.4	0.5	0.7	0.2	1	-99	0.5	0.7	0.4	0.7
2014-01-14	18	0.2	0.6	0.8	-99	-99	0.5	0.8	0.8	0.7	-99	-99	0.9	-99	0.8	0.3	-99	0.4	0.5	0.9	0.2	0.8	-99	0.5	0.9	0.5	0.5
2014-01-14	19	0.3	0.6	0.8	-99	-99	0.6	0.7	0.8	0.8	-99	-99	1	-99	1.1	0.5	-99	0.5	0.5	1.2	0.2	0.7	-99	0.9	1.4	0.5	0.7
2014-01-14	20	0.3	0.6	0.6	-99	-99	0.7	0.7	0.7	0.6	-99	-99	1	-99	1.1	0.4	-99	0.5	-99	1.1	0.7	0.8	-99	0.9	1.2	0.6	0.6
2014-01-14	21	0.2	0.7	0.8	-99	-99	0.9	0.8	0.7	0.9	-99	-99	0.9	-99	0.9	0.4	-99	0.7	0.5	1.2	0.6	0.8	-99	0.8	0.8	0.7	0.7
2014-01-14	22	0.2	0.6	0.9	-99	-99	1.3	1.4	0.6	0.9	-99	-99	1.1	-99	1.1	0.8	-99	0.7	0.7	1.2	0.6	0.9	-99	0.7	0.6	1.1	0.7
2014-01-14	23	0.2	0.6	0.8	-99	-99	0.6	0.9	0.6	1	-99	-99	0.9	-99	1.1	0.9	-99	0.9	0.5	1.3	0.6	0.8	-99	0.9	0.7	0.8	0.7
2014-01-14	24	-99	0.6	0.7	-99	-99	0.6	0.6	-99	0.5	-99	-99	0.7	-99	1.1	-99	-99	0.6	0.6	1.5	0.7	0.5	-99	1.1	0.8	0.3	0.2
2014-01-15	1	0.2	0.6	0.6	-99	-99	0.5	0.5	-99	0.4	-99	-99	0.6	-99	0.7	-99	-99	0.4	0.4	0.8	0.9	0.4	-99	1.1	0.4	0.3	0.2
2014-01-15	2	0.1	0.4	0.5	-99	-99	0.3	0.4	-99	0.3	-99	-99	0.5	-99	0.4	-99	-99	0.3	0.1	0.5	0.8	0.4	-99	0.8	0.3	0.3	0.2
2014-01-15	3	0	0.3	0.4	-99	-99	0.3	0.4	-99	0.2	-99	-99	0.3	-99	0.3	-99	-99	0.2	0.1	0.4	0.4	0.3	-99	0.5	0.2	0.2	0.1
2014-01-15	4	0	0.3	0.3	-99	-99	0.2	0.4	-99	0.1	-99	-99	0.3	-99	0.2	-99	-99	0.2	0.1	0.3	0.3	0.3	-99	0.4	0.1	0.1	0.2
2014-01-15	5	0	0.2	0.3	-99	-99	0.2	0.3	-99	0.1	-99	-99	0.3	-99	0.3	-99	-99	0.2	0.1	0.3	0.2	0.2	-99	0.3	0.1	0.1	0.1
2014-01-15	6	0	0.3	0.3	-99	-99	0.2	0.3	0.2	0.2	-99	-99	0.5	-99	0.5	0.1	-99	0.2	0.2	0.3	0.3	0.3	-99	0.3	0.2	0.2	0.2
2014-01-15	7	0.1	0.4	0.4	-99	-99	0.3	0.4	0.3	0.3	-99	-99	0.7	-99	0.8	0.1	-99	0.2	0.3	0.6	0.4	0.5	-99	0.5	0.4	0.3	0.2
2014-01-15	8	0	0.5	0.6	-99	-99	0.4	0.6	0.5	0.5	-99	-99	0.9	-99	1.1	0.2	-99	0.3	0.4	0.9	0.8	0.6	-99	0.6	0.7	0.4	0.6
2014-01-15	9	0.1	0.6	0.8	-99	-99	0.5	0.8	0.6	0.5	-99	-99	1	-99	1	0.3	-99	0.3	0.4	1	0.7	0.7	-99	0.7	0.6	0.5	0.4
2014-01-15	10	0.1	0.5	0.5	-99	-99	0.5	0.8	0.5	0.5	-99	-99	0.6	-99	0.7	0.4	-99	0.4	0.4	0.8	0.5	0.7	-99	0.7	0.4	0.3	0.4
2014-01-15	11	0	0.4	0.4	-99	-99	0.5	-99	0.5	0.4	-99	-99	0.6	-99	0.4	0.3	-99	0.4	0.2	0.7	0.3	0.5	-99	0.6	0.3	0.2	0.4
2014-01-15	12	0	0.4	0.5	-99	-99	0.4	-99	0.4	0.4	-99	-99	0.5	-99	0.5	0.2	-99	0.3	0.2	0.6	0.2	0.4	-99	0.5	0.3	0.2	0.3
2014-01-15	13	0	0.4	0.5	-99	-99	0.4	-99	0.4	-99	-99	-99	0.4	-99	0.5	0.2	-99	0.3	0.2	0.7	-99	0.6	-99	0.5	0.5	0.2	0.4
2014-01-15	14	0	0.4	0.5	-99	-99	0.4	0.5	0.3	0.4	-99	-99	0.4	-99	0.5	0.2	-99	0.3	0.2	0.7	-99	0.5	-99	0.5	0.6	0.2	0.4
2014-01-15	15	0	0.4	0.5	-99	-99	0.4	0.5	0.4	0.4	-99	-99	0.5	-99	0.6	0.2	-99	0.3	0.2	0.7	-99	0.7	-99	0.5	0.6	0.2	0.3
2014-01-15	16	0	0.4	0.4	-99	-99	0.4	0.5	0.4	0.4	-99	-99	0.5	-99	0.5	0.3	-99	0.3	0.2	0.7	0.5	0.6	-99	0.5	0.7	0.2	0.3
2014-01-15	17	0	0.4	0.5	-99	-99	0.5	0.6	0.4	0.3	-99	-99	0.5	-99	0.6	0.3	-99	0.4	0.2	0.7	0.5	0.6	-99	0.5	0.7	0.2	0.3
2014-01-15	18	0.1	0.5	0.6	-99	-99	0.5	0.6	0.4	0.5	-99	-99	0.5	-99	0.6	0.3	-99	0.4	0.3	0.8	0.6	0.8	-99	0.6	0.8	0.3	0.4
2014-01-15	19	0.1	0.7	0.9	-99	-99	0.6	0.9	0.5	0.7	-99	-99	0.9	-99	0.8	0.5	-99	0.4	0.4	1	1	0.9	-99	0.7	0.7	0.4	0.6
2014-01-15	20	0.1	0.7	0.8	-99	-99	0.6	0.9	0.7	0.9	-99	-99	0.9	-99	1.1	0.5	-99	0.5	0.6	1.1	0.9	1	-99	0.7	0.6	0.4	0.7
2014-01-15	21	0.2	0.6	0.8	-99	-99	0.6	0.5	0.7	1	-99	-99	1	-99	1	0.6	-99	0.5	0.7	1.2	0.9	0.8	-99	0.8	0.7	0.3	0.7
2014-01-15	22	0.1	0.9	0.8	-99	-99	0.6	0.6	0.5	0.6	-99	-99	0.8	-99	1.3	0.4	-99	0.7	0.5	1.1	0.9	0.7	-99	0.9	1.1	0.4	1
2014-01-15	23	0.1	0.8	0.8	-99	-99	0.7	0.9	0.7	0.6	-99	-99	0.8	-99	1	0.6	-99	0.7	0.6	1	1	0.7	-99	0.8	0.8	0.4	1.2
2014-01-15	24	-99	1.3	0.8	-99	-99	0.8	0.9	0.8	0.7	-99	-99	0.8	-99	0.7	0.5	-99	0.5	0.7	1.4	0.8	0.7	-99	1.3	0.8	0.4	-99
2014-01-16	1	-99	1.5	0.7	-99	-99	0.6	0.8	0.7	0.8	-99	-99	0.9	-99	0.6	0.6	-99	0.4	0.8	1.1	1	0.8	-99	1.2	0.7	0.4	-99
2014-01-16	2	-99	0.9	0.9	-99	-99	0.5	0.8	0.9	0.7	-99	-99	0.8	-99	0.5	0.7	-99	0.4	0.6	1.1	0.7	0.8	-99	1.2	0.5	0.3	-99
2014-01-16	3	-99	0.6	1	-99	-99	0.4	0.7	0.7	0.4	-99	-99	0.5	-99	0.4	0.7	-99	0.3	0.4	1.1	0.8	0.6	-99	1.1	0.5	0.4	-99
2014-01-16	4	-99	0.6	1	-99	-99	0.6	0.6	0.5	0.4	-99	-99	0.6	-99	0.4	0.5	-99	0.4	0.6	1	0.7	0.6	-99	0.9	0.4	0.4	-99
2014-01-16	5	-99	0.6	1.1	-99	-99	0.5	0.6	0.6	0.4	-99	-99	0.9	-99	0.7	0.5	-99	0.3	0.4	0.9	0.8	0.5	-99	0.9	0.4	0.4	0.6
2014-01-16	6	0.1	0.9	1.2	-99	-99	0.4	0.8	0.9	0.9	-99	-99	1.1	-99	0.7	0.8	-99	0.4	2	1	0.8	0.8	-99	0.9	0.9	0.7	1.5
2014-01-16	7	0.3	1.6	1.5	-99	-99	0.9	1.6	1.4	1.5	-99	-99	1.4	-99	1.7	0.8	-99	0.9	1.7	1.4	0.9	1.7	-99	1.2	1.6	-99	2.3
2014-01-16	8	0.6	2.5	2.8	-99	-99	2.7	2.9	2.1	2.3	-99	-99	2.7	-99	2.1	1	-99	1.4	2	2	1.2	2.3	-99	1.8	2.5	-99	2.7
2014-01-16	9	0.5	2.9	2.9	-99	-99	1.1	3.3	2.5	2	-99	-99	2.5	-99	1.9	1.1	-99	1.5	1.9	1.9	1.3	2.3	-99	1.6	2.9	-99	3.2
2014-01-16	10	0.3	2	2.8	-99	-99	1.4	2.9	2.4	2.2	-99	-99	1.5	-99	1.8	1.2	-99	2	1.5	1.8	1.4	2.7	-99	1.6	3	-99	2.8
2014-01-16	11	0.2	1.8	2.4	-99	-99	1.8	3	1.9	1.7	-99	-99	1.4	-99	1.6	1.7	-99	1.6	1.1	1.9	0.8	2.2	-99	1.3	-99	-99	2.4
2014-01-16	12	0.2	-99	1.6	-99	-99	1.6	2.2	1.6	1.4	-99	-99	1.2	-99	0.9	1.2	-99	1.5	0.7	1.7	0.4	2.5	-99	1.2	-99	0.9	1.7
2014-01-16	13	0.1	-99	0.9	-99	-99	1.8	1.4	1	0.7	-99	-99	0.9	-99	0.5	1	-99	1.4	0.6	2.3	0.6	1.4	-99	1.5	-99	0.7	0.7
2014-01-16	14	0.1	-99	0.8	-99	-99	1.6	1.2	0.8	0.6	-99	-99	1	-99	0.6	0.8	-99	1.3	0.6	1.6	1	-99	-99	1	-99	0.5	0.9
2014-01-16	15	0.1	1.1	0.9	-99	-99	1.4	1.3	1.1	0.8	-99	-99	1.1	-99	0.7	0.8	-99	1.2	-99	1.4	0.8	-99	-99	1.2	0.8	0.3	1
2014-01-16	16	0.1	1	1.2	-99	-99	1	1	1.1	0.7	-99	-99	1.2	-99	0.9	0.8	-99	1	-99	1.4	0.8	-99	-99	1.2	1	0.8	0.9
2014-01-16	17	0.2	0.9	1.1	-99	-99	0.9	1.3	1.1	0.7	-99	-99	1.1	-99	0.9	0.6	-99	0.7	-99	1.3	0.8	-99	-99	1.1	1	0.8	1
2014-01-16	18	0.3	0.9	1.2	-99	-99	1.2	1	1	0.8	-99	-99	1.3	-99	1	0.9	-99	0.9	-99	1.3	0.8	1.2	-99	1	1.1	0.6	1.1
2014-01-16	19	0.5	0.7	1.2	-99	-99	1.5	1.4	1.1	1.1	-99	-99	1.8	-99	1.2	1.2	-99	1.3	-99	1.9	1.1	1.2	-99	1.5	2	0.9	0.9
2014-01-16	20	0.5	0.8	1.4	-99	-99	0.9	1.6	1	1.1	-99	-99	1.7	-99	1.2	1.3	-99	1.2	-99	2.6	0.7	1.3	-99	1.3	1.4	0.8	0.6
2014-01-16	21	0.4	0.8	1.2	-99	-99	0.7	1.7	1	1.6	-99	-99	1.1	-99	1.2	0.7	-99	0.8	-99	2.2	0.8	1.2	-99	1.3	1.3	0.9	0.5
2014-01-16	22	0.5	0.9	0.8	-99	-99	0.7	1.8	0.6	1	-99	-99	0.7	-99	1.2	0.6	-99	0.9	-99	1.3	0.8	1.1	-99	1	1.1	0.7	0.3
2014-01-16	23	0.5	1.2	0.8	-99	-99	0.6	1.8	0.7	0.4	-99	-99	0.6	-99	0.9	0.8	-99	0.8	-99	1.5	0.7	1.1	-99	1.2	0.9	0.6	0.3
2014-01-16	24	0.4	0.9	1	-99	-99	0.6	1.6	0.8	0.9	-99	-99	0.9	-99	0.7	0.9	-99	0.6	-99	2.1	0.6	0.9	-99	-99	1	0.6	0.6
2014-01-17	1	0.3	0.6	1	-99	-99	0.4	1.2	0.9	1.2	-99	-99	0.9	-99	-99	0.6	-99	0.6	0.8	1.6	0.5	0.7	-99	-99	0.7	0.5	0.8
2014-01-17	2	0.2	0.8	1	-99	-99	0.4	1	0.9	1.6	-99	-99	0.9	-99	-99	0.5	-99	0.4	0.9	1	0.4	0.5	-99	-99	0.7	0.4	0.9
2014-01-17	3	0.3	0.5	0.9	-99	-99	0.4	0.8	0.9	1.7	-99	-99	0.8	-99	-99	0.4	-99	0.3	1.1	1.3	0.3	0.6	-99	-99	1	0.4	0.9
2014-01-17	4	0.2	0.4	0.8	-99	-99	0.3	0.6	0.9	1.6	-99	-99	0.8	-99	-99	0.2	-99	0.2	1.5	1.3	0.3	0.5	-99	-99	0.8	0.5	1
2014-01-17	5	0.3	0.3	0.9	-99	-99	0.3	0.5	1	1.5	-99	-99	1.1	-99	-99	0.2	-99	0.2	1.2	1.1	0.5	0.6	-99	-99	1	0.6	1
2014-01-17	6	0.4	0.5	1.1	-99	-99	0.4	0.8	1.2	2.1	-99	-99	2	-99	-99	0.2	-99	0.4	1.8	1.1	1	0.7	-99	0.6	1.1	1.1	1.8
2014-01-17	7	0.7	1.2	1.4	-99	-99	0.9	1.4	2.7	3.3	-99	-99	2.6	-99	-99	0.6	-99	0.7	3.6	1.7	0.9	1.5	-99	1.6	1.9	1.7	2.3
2014-01-17	8	1	1.8	2.2	-99	-99	2.3	2.7	3.3	5.2	-99	-99	3.8	-99	-99	1.1	-99	1.2	4	3.4	1.9	3	-99	1.5	2.9	1.9	3.6
2014-01-17	9	0.9	1.8	3.4	-99	-99	1.5	3.1	3.8	2.8	-99	-99	3.4	-99	-99	1	-99	0.8	4.2	4.3	3.3	3.6	-99	2.2	3	1.5	4.6
2014-01-17	10	0.3	0.7	2	-99	-99	0.7	1.9	3.1	2.3	-99	-99	1.8	-99	-99	1.2	-99	0.6	2.5	2.8	2	2.2	-99	1.6	1.7	1.6	2.8
2014-01-17	11	0.3	0.6	0.9	-99	-99	0.6	1	1.1	1.4	-99	-99	1.5	-99	-99	1.2	-99	0.6	1.1	1.7	1.5	1.4	-99	1.4	1.1	0.5	1.3
2014-01-17	12	0.1	0.4	-99	-99	-99	0.5	0.7	0.9	1	-99	-99	1.1	-99	-99	0.4	-99	0.5	0.7	1.4	0.6	0.7	-99	0.7	0.8	0.4	0.5
2014-01-17	13	0.1	0.3	-99	-99	-99	0.5	0.6	0.5	0.5	-99	-99	0.6	-99	-99	0.3	-99	0.5	0.4	1	0.5	0.6	-99	0.8	0.6	0.4	0.5
2014-01-17	14	0.1	0.3	-99	-99	-99	0.4	0.5	0.4	0.3	-99	-99	0.6	-99	-99	0.3	-99	0.4	0.4	1.3	0.5	0.6	-99	0.4	0.5	0.3	0.5
2014-01-17	15	0.1	0.3	0.5	-99	-99	0.4	0.5	0.5	0.3	-99	-99	0.6	-99	-99	0.3	-99	0.3	0.4	0.8	0.5	0.6	-99	0.3	0.5	0.2	0.4
2014-01-17	16	0.1	0.2	0.5	-99	-99	0.4	0.6	0.5	0.3	-99	-99	0.6	-99	0.5	0.3	-99	0.3	0.4	0.6	0.5	0.6	-99	0.4	0.5	0.2	0.4
2014-01-17	17	0.1	0.3	0.5	-99	-99	0.5	0.5	0.5	0.5	-99	-99	0.4	-99	0.7	0.3	-99	0.4	0.4	0.6	0.4	0.6	-99	0.4	0.5	0.2	0.5
2014-01-17	18	-99	0.3	0.7	-99	-99	0.6	0.6	0.5	0.5	-99	-99	0.5	-99	0.7	0.4	-99	0.4	0.4	2	0.6	0.7	-99	0.3	0.6	0.3	0.5
2014-01-17	19	0.1	0.4	0.8	-99	-99	0.7	1	0.6	0.9	-99	-99	0.7	-99	0.9	0.6	-99	0.6	0.6	1.2	1	0.7	-99	0.4	0.5	0.4	0.5
2014-01-17	20	0.1	0.6	0.8	-99	-99	0.7	0.9	0.6	0.6	-99	-99	0.6	-99	0.9	0.6	-99	0.6	0.5	0.8	0.6	0.8	-99	0.4	0.4	0.4	0.6
2014-01-17	21	0.1	0.5	0.9	-99	-99	0.7	0.7	0.7	0.6	-99	-99	0.6	-99	0.9	0.4	-99	0.5	0.5	1.6	0.7	0.6	-99	0.4	0.5	0.5	0.6
2014-01-17	22	0.1	0.5	0.9	-99	-99	0.6	0.7	0.7	0.5	-99	-99	0.7	-99	1	0.8	-99	0.8	0.7	0.8	0.6	0.7	-99	0.6	0.7	0.4	0.5
2014-01-17	23	0.1	0.7	0.7	-99	-99	0.6	0.6	0.6	0.5	-99	-99	0.8	-99	1.4	0.8	-99	0.7	1	1.1	0.8	0.6	-99	0.7	0.8	0.6	0.7
2014-01-17	24	0.1	0.9	0.7	-99	-99	0.5	0.6	0.7	0.5	-99	-99	0.7	-99	1.2	0.7	-99	0.5	0.9	0.8	0.7	0.6	-99	0.6	0.8	0.7	1.1
2014-01-18	1	0.1	1.1	0.8	-99	-99	0.7	1	0.7	0.5	-99	-99	0.7	-99	0.8	0.5	-99	0.4	0.9	0.7	0.8	0.7	-99	0.7	0.7	0.4	0.5
2014-01-18	2	0.2	0.8	0.7	-99	-99	1.1	0.8	0.7	0.6	-99	-99	0.8	-99	0.7	0.4	-99	0.3	0.7	0.7	0.7	0.6	-99	0.9	0.8	0.3	0.7
2014-01-18	3	0.1	0.4	0.6	-99	-99	0.7	0.7	0.6	0.5	-99	-99	0.7	-99	0.5	0.4	-99	0.4	1.1	0.7	0.7	0.6	-99	0.9	0.6	0.2	0.7
2014-01-18	4	0.1	0.4	0.6	-99	-99	0.7	0.6	0.6	0.5	-99	-99	0.7	-99	0.4	0.3	-99	0.3	0.8	0.5	0.5	0.5	-99	0.7	0.4	0.3	0.5
2014-01-18	5	0.1	0.5	0.6	-99	-99	0.7	0.6	0.6	0.5	-99	-99	0.6	-99	0.4	0.3	-99	0.3	0.8	0.7	0.7	0.6	-99	0.5	0.4	0.4	0.9
2014-01-18	6	0.1	0.6	0.7	-99	-99	0.7	0.7	0.7	1.2	-99	-99	1.2	-99	0.5	0.5	-99	0.4	1.1	0.8	0.9	0.7	-99	0.7	0.4	0.5	0.9
2014-01-18	7	0.3	0.9	1.3	-99	-99	1.2	1.1	1.6	1.4	-99	-99	1.2	-99	0.7	0.5	-99	0.6	1.1	1.1	0.8	1.4	-99	1.2	0.9	0.7	1.7
2014-01-18	8	0.4	2.1	2.1	-99	-99	1.7	1.6	1.7	1.6	-99	-99	2.2	-99	1.2	0.8	-99	0.8	1.4	1.3	2.1	1.8	-99	1.2	1.7	1	2
2014-01-18	9	0.6	2	1.6	-99	-99	-99	1.9	2.2	1.5	-99	-99	2.3	-99	1.5	0.8	-99	1.3	1.3	1.6	2	2.2	-99	1.5	1.2	2	2.1
2014-01-18	10	0.5	1.5	2.1	-99	-99	1.8	1.6	2	1.4	-99	-99	1.6	-99	-99	0.8	-99	1.3	1.1	1.6	1	1.5	-99	1.7	1.1	1.8	1.7
2014-01-18	11	0.2	1.1	2.2	-99	-99	0.9	1.9	1.7	1.5	-99	-99	1.6	-99	1.4	0.8	-99	0.6	1.2	1.4	1	1.7	-99	1.3	1.4	1	1.8
2014-01-18	12	0.2	0.8	1.7	-99	-99	0.9	1.4	1.4	1	-99	-99	1.3	-99	1.3	0.6	-99	0.7	1.1	0.9	0.6	1.3	-99	0.7	1.2	0.7	1.5
2014-01-18	13	0.1	1.2	1.1	-99	-99	0.9	1.3	1.2	1	-99	-99	1.1	-99	1.2	0.6	-99	0.9	0.8	2	0.5	1.5	-99	0.8	1	0.5	1
2014-01-18	14	0.1	0.9	0.8	-99	-99	1	1.1	0.9	0.7	-99	-99	0.8	-99	0.8	0.5	-99	0.9	0.5	1.1	0.5	1.2	-99	0.8	1	0.4	0.6
2014-01-18	15	0.2	0.6	0.8	-99	-99	1	-99	0.8	0.6	-99	-99	0.8	-99	0.5	0.6	-99	0.8	0.5	0.9	0.4	1.2	-99	0.9	0.8	0.4	0.6
2014-01-18	16	0.2	0.6	0.9	-99	-99	0.9	1.2	0.8	0.7	-99	-99	0.9	-99	0.6	0.6	-99	0.8	-99	0.8	0.4	1.2	-99	0.7	0.8	0.5	0.7
2014-01-18	17	0.3	0.7	0.9	-99	-99	0.9	1.2	0.9	0.7	-99	-99	1.1	-99	0.8	0.6	-99	0.8	0.6	0.8	0.4	1	-99	0.6	0.9	0.5	0.7
2014-01-18	18	0.3	0.7	1.1	-99	-99	0.8	1.9	0.9	0.8	-99	-99	1.1	-99	0.7	0.6	-99	0.8	0.7	0.8	0.4	1.3	-99	0.5	0.7	0.4	0.9
2014-01-18	19	0.3	0.9	1.4	-99	-99	0.8	2	1.1	1	-99	-99	0.9	-99	0.8	0.9	-99	0.8	0.8	1	0.5	1.1	-99	0.6	0.7	1.1	0.8
2014-01-18	20	0.2	0.9	1.4	-99	-99	0.8	1.8	1.1	1.3	-99	-99	1.1	-99	0.9	1	-99	0.8	0.9	1.1	1.2	1.5	-99	0.6	1	0.8	0.8
2014-01-18	21	0.1	0.8	1.2	-99	-99	0.9	0.7	1.4	1.8	-99	-99	1.8	-99	1.1	1.2	-99	0.6	1.1	1.2	1.8	1	-99	0.9	1.5	0.8	1
2014-01-18	22	0.1	0.7	1	-99	-99	0.8	0.8	1	2.1	-99	-99	1.5	-99	1.4	0.8	-99	0.6	1	1.7	1.6	1	-99	1.1	1.3	0.7	1.7
2014-01-18	23	0.1	1	1.1	-99	-99	0.7	0.6	1	1.5	-99	-99	2	-99	1.6	0.9	-99	0.5	0.8	1.8	1.3	0.9	-99	1	1.6	0.8	1.6
2014-01-18	24	0	0.8	0.7	-99	-99	0.7	0.6	0.8	0.8	-99	-99	1.1	-99	1	0.8	-99	-99	1.1	1.4	1.3	0.6	-99	1.1	2	0.6	1.9
2014-01-19	1	0.1	0.4	0.7	-99	-99	0.9	0.5	0.6	0.5	-99	-99	0.8	-99	0.9	0.8	-99	-99	0.9	1.1	1.3	0.6	-99	0.9	1.1	0.5	1.7
2014-01-19	2	0.2	0.6	0.6	-99	-99	0.8	0.7	0.6	0.5	-99	-99	0.8	-99	1.1	0.6	-99	-99	1.3	0.9	1.1	0.6	-99	1.7	1.2	0.4	1.6
2014-01-19	3	0.3	0.4	0.7	-99	-99	0.7	0.7	0.7	0.7	-99	-99	1.2	-99	0.7	0.4	-99	-99	1.1	0.7	0.6	0.7	-99	1	1	0.5	1.6
2014-01-19	4	0.2	0.3	0.9	-99	-99	0.7	0.7	0.7	1.2	-99	-99	1.1	-99	0.5	0.3	-99	-99	1	0.9	1	0.7	-99	0.9	1.2	0.9	1.2
2014-01-19	5	0.1	0.3	0.7	-99	-99	0.6	0.6	1	1.6	-99	-99	1.4	-99	0.7	0.3	-99	-99	0.7	0.8	0.9	0.5	-99	0.8	1.2	0.9	1.2
2014-01-19	6	0.2	0.4	0.9	-99	-99	0.4	0.7	1.4	1.3	-99	-99	0.9	-99	0.7	0.3	-99	0.3	1.1	1	1	0.7	-99	0.8	1.1	0.9	1.5
2014-01-19	7	0.3	0.8	1	-99	-99	0.6	1.1	1.4	1.3	-99	-99	1.5	-99	1.2	0.4	-99	0.5	1.8	1.3	1.1	0.7	-99	1.2	1.4	0.8	1.3
2014-01-19	8	0.4	0.9	1.5	-99	-99	1.3	1.6	2.3	1.5	-99	-99	2.2	-99	2.6	0.7	-99	0.5	1.4	1.7	1.2	0.9	-99	1.3	2	1.3	2.5
2014-01-19	9	0.5	1	1.5	-99	-99	1.1	1.4	2.1	1.4	-99	-99	2.5	-99	2.7	0.9	-99	0.7	1.7	1.6	2.1	1.1	-99	1	2.3	1.3	2.2
2014-01-19	10	0.3	1.3	1.5	-99	-99	0.4	1.7	1.9	1.4	-99	-99	2.1	-99	1.5	0.7	-99	0.4	1.3	1.3	1.7	1.1	-99	1	1.3	1.1	1.8
2014-01-19	11	0.2	1	1.1	-99	-99	0.5	0.9	1.6	1.1	-99	-99	1.8	-99	1.2	0.7	-99	0.4	1.1	1.1	0.7	1.1	-99	0.8	1.4	0.7	1.7
2014-01-19	12	0.2	0.6	0.8	-99	-99	0.5	0.9	1.1	1.1	-99	-99	1.3	-99	1.1	0.4	-99	0.5	1	0.9	0.6	0.9	-99	0.7	1	0.5	1
2014-01-19	13	0.2	0.4	0.8	-99	-99	0.5	0.6	0.7	0.7	-99	-99	0.8	-99	0.9	0.4	-99	-99	0.5	0.7	0.8	0.9	-99	0.7	0.7	0.3	0.5
2014-01-19	14	0.1	0.4	0.9	-99	-99	0.5	0.6	0.8	0.5	-99	-99	0.7	-99	0.6	0.4	-99	-99	0.5	0.7	0.7	0.8	-99	0.6	0.4	0.3	0.5
2014-01-19	15	0.1	0.4	0.8	-99	-99	0.7	0.6	0.9	0.6	-99	-99	0.7	-99	0.5	0.4	-99	0.5	0.5	0.8	0.7	0.8	-99	0.6	0.4	0.4	0.5
2014-01-19	16	0.1	0.6	0.8	-99	-99	0.8	0.6	0.8	0.6	-99	-99	0.8	-99	0.6	0.5	-99	0.6	0.4	0.8	0.7	0.8	-99	0.6	0.4	0.4	0.5
2014-01-19	17	0.1	0.4	0.8	-99	-99	0.8	0.6	0.8	0.6	-99	-99	0.9	-99	0.7	0.5	-99	0.6	0.5	0.8	0.7	0.7	-99	0.6	0.6	0.3	0.5
2014-01-19	18	0.1	0.4	0.8	-99	-99	0.8	0.6	0.8	0.6	-99	-99	1	-99	0.9	0.7	-99	0.6	0.6	1.1	0.9	0.7	-99	0.7	0.7	0.3	0.5
2014-01-19	19	0.2	0.4	0.6	-99	-99	0.8	0.6	0.6	0.6	-99	-99	0.7	-99	1	0.6	-99	0.6	0.5	1.2	1.1	0.6	-99	0.9	0.7	0.4	0.6
2014-01-19	20	-99	0.6	0.6	-99	-99	0.6	0.5	0.6	0.7	-99	-99	0.8	-99	1.1	0.4	-99	0.4	0.6	0.8	0.8	0.5	-99	0.6	0.8	0.5	0.3
2014-01-19	21	0.2	0.5	0.7	-99	-99	0.5	0.4	0.6	0.7	-99	-99	0.8	-99	1.2	0.4	-99	0.4	0.5	0.9	1	0.5	-99	0.6	0.7	0.5	0.6
2014-01-19	22	0.2	0.4	0.8	-99	-99	1.2	1.2	0.6	0.5	-99	-99	0.7	-99	1.1	0.5	-99	0.7	0.6	1	0.8	0.7	-99	0.7	0.6	0.7	1.3
2014-01-19	23	0.2	0.4	0.7	-99	-99	1.4	1.4	0.6	0.5	-99	-99	0.7	-99	1.1	0.5	-99	0.7	0.6	1.4	0.8	0.8	-99	1.2	0.8	0.5	1.5
2014-01-19	24	0.2	0.4	0.7	-99	-99	0.8	1.1	0.7	0.6	-99	-99	0.7	-99	1.1	0.5	-99	0.6	0.9	1.4	0.9	-99	-99	1.6	0.9	0.4	1.3
2014-01-20	1	0.3	0.4	0.7	-99	-99	1	0.8	0.7	0.5	-99	-99	0.7	-99	0.8	0.4	-99	0.4	0.9	1.3	0.7	-99	-99	1.5	0.9	0.5	1.4
2014-01-20	2	0.2	0.3	0.7	-99	-99	0.8	0.5	0.6	0.7	-99	-99	0.8	-99	0.4	0.4	-99	0.4	0.7	1.2	0.7	-99	-99	1	0.7	0.7	1
2014-01-20	3	0.2	0.3	0.8	-99	-99	0.6	0.5	0.9	0.5	-99	-99	0.8	-99	0.4	0.4	-99	0.4	0.7	1.1	0.7	-99	-99	0.7	0.4	0.4	0.9
2014-01-20	4	0.2	0.3	0.8	-99	-99	0.6	0.5	0.7	0.4	-99	-99	0.7	-99	0.5	0.4	-99	0.4	0.6	0.8	0.7	-99	-99	0.8	0.3	0.5	1
2014-01-20	5	0.2	0.4	1	-99	-99	0.6	0.6	0.7	0.5	-99	-99	0.7	-99	0.7	0.3	-99	0.4	0.5	0.9	1.1	-99	-99	0.8	0.5	0.5	0.6
2014-01-20	6	0.3	0.6	1.2	-99	-99	0.7	0.9	0.8	0.9	-99	-99	1.3	-99	1.1	0.5	-99	0.4	1.5	1.2	1	0.6	-99	1	1.1	1	0.9
2014-01-20	7	0.5	1.8	2.8	-99	-99	1.1	1.8	1.6	3.5	-99	-99	1.9	-99	2.7	0.5	-99	0.6	2.5	1.9	1.1	1.9	-99	1.1	1.8	1.2	2
2014-01-20	8	0.8	3.5	4	-99	-99	2.2	3.9	2.7	3.5	-99	-99	3	-99	3.8	1.5	-99	0.9	3.5	3.1	1.9	2.9	-99	2.3	2.7	1.9	4
2014-01-20	9	0.8	3.2	3.3	-99	-99	1.7	3.2	3.3	3.4	-99	-99	3.1	-99	1.7	1.9	-99	0.8	3	3.2	3.6	3.4	-99	1.4	3.8	1.9	3.4
2014-01-20	10	0.5	2.1	2.4	-99	-99	1.1	2.2	3.1	3.1	-99	-99	2.9	-99	1.5	1.7	-99	0.9	1.3	2.3	1.2	2.8	-99	1.6	2.8	1.1	2.4
2014-01-20	11	0.4	1.6	2.9	-99	-99	1.9	2.3	2.7	-99	-99	-99	1.7	-99	1.4	1.5	-99	1.7	1	2.4	0.8	2.5	-99	2.2	1.8	0.9	2.3
2014-01-20	12	0.3	1.3	1.5	-99	-99	2.1	1.7	1.5	-99	-99	-99	1	-99	1.5	1.7	-99	1.8	0.7	2.9	0.8	1.6	-99	1.9	1.6	1	1.7
2014-01-20	13	0.2	1.1	1.2	-99	-99	2.3	1.8	1.1	-99	-99	-99	0.9	-99	0.8	1.4	-99	1.9	0.5	1.7	0.9	1.2	-99	1.4	1	0.6	0.8
2014-01-20	14	0.2	0.7	1	-99	-99	1.5	1.1	0.8	0.6	-99	-99	0.7	-99	0.4	1.1	-99	1.4	0.5	2.3	1	0.9	-99	0.9	0.5	0.5	0.8
2014-01-20	15	0.1	0.6	0.8	-99	-99	1	0.9	1.1	0.7	-99	-99	0.9	-99	0.8	0.7	-99	0.8	0.6	1	0.7	0.7	-99	0.6	0.7	0.3	0.7
2014-01-20	16	0.1	0.5	0.8	-99	-99	0.9	0.9	0.8	0.6	-99	-99	0.8	-99	0.7	0.7	-99	0.7	0.5	1	0.7	0.9	-99	0.7	1	0.3	0.5
2014-01-20	17	0.1	0.4	0.6	-99	-99	0.8	0.8	0.7	0.6	-99	-99	0.8	-99	0.6	0.6	-99	0.5	0.3	0.9	0.8	0.8	-99	0.6	0.9	0.3	0.5
2014-01-20	18	0.2	0.5	0.7	-99	-99	0.8	0.9	0.6	0.5	-99	-99	0.7	-99	0.6	0.5	-99	0.5	0.4	0.9	0.7	0.7	-99	0.6	-99	0.3	0.5
2014-01-20	19	0.3	0.7	0.9	-99	-99	0.9	1.3	0.8	0.9	-99	-99	0.9	-99	1.1	0.6	-99	0.6	0.5	1.2	-99	0.7	-99	0.7	1	0.5	0.5
2014-01-20	20	0.5	1.1	0.9	-99	-99	1.6	1.5	1	1.4	-99	-99	1	-99	1.5	1	-99	0.9	0.8	1.6	1.3	1.2	-99	0.8	1.1	0.8	0.5
2014-01-20	21	0.6	0.6	1.3	-99	-99	1.5	2.2	1	1.5	-99	-99	0.8	-99	1.4	0.9	-99	0.8	1.1	2.6	2	1.7	-99	1.4	1.5	1.5	0.3
2014-01-20	22	0.4	0.4	2	-99	-99	0.5	2.4	2.1	2.3	-99	-99	1.2	-99	1.3	0.8	-99	0.6	1.2	3.3	1	1	-99	1.7	1.4	1.8	0.9
2014-01-20	23	0.3	0.6	2	-99	-99	0.5	2.1	2.2	2.8	-99	-99	1.6	-99	1.1	1	-99	0.7	1.5	3.4	1.2	1.2	-99	1.9	1.3	1.3	0.8
2014-01-20	24	0.3	0.5	2.5	-99	-99	-99	1.5	1.8	2.3	-99	-99	-99	-99	0.9	1.2	-99	0.5	1.7	2.7	1.1	0.9	-99	2	1.2	1.6	0.2
2014-01-21	1	0.3	0.3	1.9	-99	-99	-99	0.8	1.7	2.9	-99	-99	-99	-99	0.7	0.6	-99	0.4	2.1	2.3	0.9	1	-99	1.7	1.5	1.8	0.9
2014-01-21	2	0.1	0.3	1.4	-99	-99	-99	0.6	1.2	2.5	-99	-99	-99	-99	0.9	0.3	-99	0.3	1.7	2.2	1.7	0.7	-99	1.2	2	1.4	1
2014-01-21	3	0.1	0.2	1	-99	-99	-99	0.4	1	2.3	-99	-99	-99	-99	0.4	0.4	-99	0.2	2	2	1.4	0.6	-99	1.4	2	0.8	1.4
2014-01-21	4	0.1	0.3	0.8	-99	-99	-99	0.4	0.7	1.4	-99	-99	-99	-99	0.4	0.3	-99	0.3	1.5	1.6	1.1	0.7	-99	1.3	0.9	0.4	1.6
2014-01-21	5	0.2	0.3	0.9	-99	-99	-99	0.4	0.6	1.9	-99	-99	-99	-99	0.5	0.2	-99	0.3	1.7	1	1.1	0.5	-99	1.2	0.7	0.8	1.6
2014-01-21	6	0.2	0.5	1	-99	-99	0.4	0.5	0.9	2.3	-99	-99	1.2	-99	0.8	0.2	-99	0.5	1.5	1.4	1.4	0.8	-99	1.4	1.4	1.4	1.9
2014-01-21	7	0.4	1.2	1.8	-99	-99	0.8	1.5	2.5	3.5	-99	-99	1.4	-99	1.1	0.4	-99	0.7	2.2	2.9	1.8	2.1	-99	1.5	2.3	1.7	2.1
2014-01-21	8	0.7	1.5	3	-99	-99	0.9	3.5	2.5	3.6	-99	-99	3.6	-99	1.7	1.5	-99	1.1	4.2	4.9	1.6	2.6	-99	2.6	2.3	2.5	4.4
2014-01-21	9	0.7	1.1	3.1	-99	-99	0.7	3.5	2.3	3.2	-99	-99	2.8	-99	-99	1.8	-99	0.6	4.4	5.4	1.5	2	-99	3.3	3	2.8	4.1
2014-01-21	10	0.3	1.1	1.6	-99	-99	0.6	1.9	1.7	2	-99	-99	2.4	-99	-99	1	-99	0.3	2.4	2.8	0.9	1.2	-99	2.4	3.1	0.7	2.4
2014-01-21	11	0	0.6	0.6	-99	-99	0.6	0.9	1	1	-99	-99	0.8	-99	0.7	0.7	-99	0.6	0.4	1	1	0.7	-99	1	0.7	0.3	0.6
2014-01-21	12	0	0.3	0.4	-99	-99	0.5	0.6	0.5	0.3	-99	-99	0.4	-99	0.4	0.3	-99	0.3	0.2	0.6	0.4	0.6	-99	0.3	0.2	-99	0.4
2014-01-21	13	0	0.3	0.5	-99	-99	0.4	0.5	0.4	0.4	-99	-99	0.3	-99	0.4	0.2	-99	0.2	0.2	0.5	0.4	0.5	-99	0.2	0.2	-99	0.4
2014-01-21	14	0	0.3	0.5	-99	-99	0.4	0.5	0.4	0.4	-99	-99	0.3	-99	0.4	0.2	-99	0.2	0.2	0.4	0.4	0.5	-99	0.3	0.2	-99	0.4
2014-01-21	15	0.1	0.3	0.5	-99	-99	0.4	0.5	0.5	0.4	-99	-99	0.3	-99	0.4	0.2	-99	0.2	0.2	0.6	0.4	0.4	-99	0.3	0.2	-99	0.3
2014-01-21	16	0	0.2	0.5	-99	-99	0.4	0.5	0.5	0.5	-99	-99	0.4	-99	0.4	0.2	-99	0.3	0.2	0.5	0.4	0.6	-99	0.3	0.2	0.3	0.3
2014-01-21	17	0.1	0.3	0.5	-99	-99	0.5	0.5	0.5	0.6	-99	-99	0.3	-99	0.5	0.2	-99	0.3	0.3	0.5	0.4	0.5	-99	0.3	0.2	0.3	0.4
2014-01-21	18	0.1	0.4	0.6	-99	-99	0.5	0.7	0.6	0.6	-99	-99	0.4	-99	0.5	0.2	-99	0.3	0.2	0.5	0.5	0.5	-99	0.3	0.4	0.4	0.5
2014-01-21	19	0.1	0.5	0.8	-99	-99	0.6	0.9	0.7	0.6	-99	-99	0.5	-99	0.7	0.3	-99	0.4	0.3	0.6	0.7	0.6	-99	0.4	0.6	0.5	0.5
2014-01-21	20	0.1	0.6	0.7	-99	-99	0.7	0.6	0.7	0.6	-99	-99	0.6	-99	0.7	0.4	-99	0.4	0.4	0.7	-99	0.7	-99	0.4	0.5	0.5	0.6
2014-01-21	21	0.1	0.6	0.7	-99	-99	0.7	0.6	0.7	0.7	-99	-99	0.6	-99	0.6	0.4	-99	0.4	0.4	1	0.9	0.7	-99	0.6	0.5	0.5	0.5
2014-01-21	22	0.1	0.5	0.7	-99	-99	0.6	0.5	0.7	0.7	-99	-99	0.7	-99	0.6	0.4	-99	0.4	0.5	0.9	0.8	0.7	-99	0.7	0.6	0.4	0.6
2014-01-21	23	0.1	0.4	0.6	-99	-99	0.5	0.4	0.6	0.5	-99	-99	0.7	-99	0.6	0.3	-99	0.3	0.6	0.7	0.9	0.6	-99	0.6	0.8	0.5	0.6
2014-01-21	24	0.1	0.4	0.6	-99	-99	0.6	0.4	-99	0.4	-99	-99	0.5	-99	0.7	-99	-99	0.4	0.6	0.6	0.9	0.5	-99	0.5	0.6	0.4	0.8
2014-01-22	1	0.2	0.8	0.5	-99	-99	0.7	0.4	-99	0.3	-99	-99	0.4	-99	0.7	-99	-99	0.4	0.5	0.5	0.8	0.4	-99	0.5	0.5	0.4	0.8
2014-01-22	2	0.1	0.5	0.5	-99	-99	0.6	0.4	-99	0.3	-99	-99	0.4	-99	0.3	-99	-99	0.4	0.4	0.4	0.7	0.4	-99	0.5	0.5	0.3	0.8
2014-01-22	3	0.1	0.5	0.5	-99	-99	0.6	0.5	-99	0.3	-99	-99	0.4	-99	0.2	-99	-99	0.4	0.5	0.4	0.6	0.4	-99	0.7	0.3	0.3	0.7
2014-01-22	4	0.1	0.3	0.6	-99	-99	0.6	0.4	-99	0.3	-99	-99	0.6	-99	0.3	-99	-99	0.4	0.4	0.6	0.6	0.4	-99	0.5	0.2	0.3	0.5
2014-01-22	5	0.2	0.3	0.6	-99	-99	0.7	0.5	-99	0.4	-99	-99	0.8	-99	0.4	-99	-99	0.4	0.6	0.5	0.6	0.3	-99	0.6	0.3	0.4	0.7
2014-01-22	6	0.2	0.6	0.6	-99	-99	-99	0.6	0.8	0.7	-99	-99	0.9	-99	0.7	0.5	-99	0.5	1.6	0.6	1.1	0.5	-99	0.8	0.6	0.6	1
2014-01-22	7	0.4	1.7	0.8	-99	-99	1.9	1.4	1.3	1.3	-99	-99	1	-99	1.1	0.7	-99	0.9	1.6	1.2	1	1.2	-99	1.7	1.1	1.2	1.8
2014-01-22	8	0.9	2.6	1.6	-99	-99	3.1	3	1.9	2.1	-99	-99	3.1	-99	2.6	1.1	-99	1.4	1.7	1.9	1.6	2	-99	1.8	1.9	1.7	2.6
2014-01-22	9	0.7	2.6	1.8	-99	-99	2.6	2.6	2.5	2.3	-99	-99	2.3	-99	1.4	1.1	-99	1.6	2.2	2.3	1.9	2.3	-99	1.7	2.3	1.8	3.2
2014-01-22	10	0.3	1.6	2.2	-99	-99	2.1	3	2.4	2	-99	-99	1.5	-99	1.5	1	-99	1.4	1.3	2.2	1.2	1.4	-99	1.1	2.4	1.6	2.7
2014-01-22	11	0.2	1.5	2.4	-99	-99	1.5	2.9	2.1	1.9	-99	-99	1.4	-99	1.3	1.5	-99	1.4	1	1.8	0.9	1.4	-99	1	1.8	1.1	1.8
2014-01-22	12	0.2	1.4	1.6	-99	-99	1.1	2.7	2	1.5	-99	-99	1.4	-99	1.4	1.2	-99	1.2	0.8	1.6	0.9	2.1	-99	1.2	1.3	0.9	1.3
2014-01-22	13	0.2	1.5	1.3	-99	-99	1.3	1.7	1.3	0.9	-99	-99	0.9	-99	0.9	0.9	-99	1.4	0.6	1.2	0.7	1.7	-99	1.3	0.8	0.8	0.9
2014-01-22	14	0.2	0.9	1.2	-99	-99	1.2	1.5	1	0.7	-99	-99	0.9	-99	0.7	0.9	-99	1.2	0.7	1.1	0.8	1.3	-99	0.7	0.7	0.4	1
2014-01-22	15	0.1	0.6	0.9	-99	-99	1.1	1.3	1.2	0.8	-99	-99	1	-99	0.6	0.8	-99	0.9	0.7	1.4	0.6	0.7	-99	0.7	0.8	0.4	0.7
2014-01-22	16	0.1	0.5	0.8	-99	-99	1.1	0.9	1.1	0.8	-99	-99	1	-99	0.4	0.7	-99	0.9	0.5	1.8	0.5	0.7	-99	0.7	0.8	0.3	0.5
2014-01-22	17	0.2	0.4	0.7	-99	-99	1.2	0.8	0.9	0.7	-99	-99	0.8	-99	0.5	0.8	-99	1	0.5	2.4	0.5	0.6	-99	0.7	0.8	0.3	0.5
2014-01-22	18	0.2	0.5	0.7	-99	-99	1.3	0.8	0.9	0.8	-99	-99	0.8	-99	0.7	0.9	-99	1	0.5	1	0.5	0.8	-99	0.6	0.9	0.5	0.7
2014-01-22	19	0.6	0.8	1.2	-99	-99	1.5	1.7	1.1	1.7	-99	-99	1.2	-99	1.1	1.3	-99	1.4	0.9	1.4	0.9	0.9	-99	0.8	1.1	1	0.7
2014-01-22	20	1	0.9	1.7	-99	-99	1.9	1.4	2	1.6	-99	-99	1.9	-99	0.9	1.3	-99	1.9	1.4	1.2	1.4	1.6	-99	1	1.6	1.3	1.2
2014-01-22	21	1	0.6	2.3	-99	-99	1.8	2	1.8	1.8	-99	-99	1.5	-99	1.1	1.5	-99	1.6	1.2	1.5	1.5	2.1	-99	1.1	2.5	1.2	1.4
2014-01-22	22	1.1	1.1	2.6	-99	-99	1.5	1.9	2.1	1.5	-99	-99	2.5	-99	1.2	1.5	-99	0.9	1.8	1.3	1.5	2.6	-99	1	1.8	2.3	1.5
2014-01-22	23	1.3	1.1	2.1	-99	-99	1.3	1.9	1.5	1.4	-99	-99	2.3	-99	1	1.1	-99	0.6	2.6	1.2	1.3	1.8	-99	1	1.3	2.9	1.6
2014-01-22	24	-99	0.8	1.6	-99	-99	1.1	1.3	1.4	1.2	-99	-99	1.9	-99	0.8	0.6	-99	0.4	3.2	1.5	1.3	1	-99	0.9	1.3	3.1	-99
2014-01-23	1	-99	0.9	1.9	-99	-99	0.6	1.4	1.2	1.1	-99	-99	1.7	-99	1.1	0.5	-99	0.4	2.7	1.2	1	1.4	-99	0.8	1.1	2.8	-99
2014-01-23	2	-99	0.7	1.6	-99	-99	0.7	1	1.2	1	-99	-99	1.3	-99	-99	1.1	-99	0.5	2.7	1	0.8	0.9	-99	0.8	1	2.2	-99
2014-01-23	3	-99	0.7	1.3	-99	-99	0.5	0.8	1	0.9	-99	-99	1.4	-99	-99	0.9	-99	0.5	2.3	1.1	0.9	0.8	-99	0.6	1	1.6	-99
2014-01-23	4	-99	0.7	1.3	-99	-99	0.4	0.7	1.1	0.9	-99	-99	1.5	-99	-99	0.8	-99	0.4	2.1	1.2	0.7	0.7	-99	0.5	1.1	1.4	-99
2014-01-23	5	-99	0.6	1.3	-99	-99	0.4	0.8	1.4	0.8	-99	-99	1.7	-99	-99	0.8	-99	0.3	2.2	1.9	0.6	0.8	-99	0.5	0.9	1.5	-99
2014-01-23	6	0.3	0.8	1.6	-99	-99	0.5	1	1.2	1	-99	-99	1.6	-99	-99	0.7	-99	0.4	2.4	1.2	0.6	1	-99	0.7	1.1	1.8	2.5
2014-01-23	7	0.5	1.9	3	-99	-99	0.9	1.7	1.6	1.5	-99	-99	2.4	-99	-99	0.8	-99	0.6	2.7	2.2	0.6	2	-99	1.6	2.2	2	3.7
2014-01-23	8	-99	3.6	4.3	-99	-99	2.9	3.8	1.6	2.6	-99	-99	4.4	-99	-99	1.3	-99	1.4	6.1	4.8	1.5	3	-99	1.6	3.8	2.8	5.4
2014-01-23	9	0.8	1.7	4.1	-99	-99	2.1	3.1	2.5	3	-99	-99	4.6	-99	-99	2.4	-99	1.4	5.5	3.7	2.2	4.4	-99	1.7	4.5	2.3	4.3
2014-01-23	10	0.5	1	2.7	-99	-99	1.3	2.8	2.8	3	-99	-99	4	-99	-99	2.6	-99	1.3	1.9	2	1.6	3.7	-99	1.6	3.2	1.8	1.8
2014-01-23	11	0.3	1.3	2.5	-99	-99	-99	1.9	3.3	2.7	-99	-99	2.4	-99	-99	1.7	-99	1.6	1.2	2.3	1	2	-99	2	1.5	1.6	1.5
2014-01-23	12	0.3	1.2	2.1	-99	-99	-99	1.6	1.8	1.3	-99	-99	1.2	-99	-99	1.2	-99	1.3	0.8	1.9	0.8	2	-99	1.5	1.1	1	1.2
2014-01-23	13	0.2	1.4	1.3	-99	-99	1.3	1.5	1.2	0.8	-99	-99	0.9	-99	-99	1.1	-99	1.1	0.5	1.5	1.1	1.7	-99	0.8	0.9	0.6	1
2014-01-23	14	0.2	0.9	1.1	-99	-99	1.5	1.6	1	0.5	-99	-99	0.8	-99	-99	0.8	-99	1.2	0.5	0.9	1.2	1.3	-99	0.7	0.9	0.6	0.9
2014-01-23	15	0.1	0.6	1.1	-99	-99	1.3	1.2	0.8	0.5	-99	-99	0.7	-99	-99	0.7	-99	1.1	0.6	1	0.8	1	-99	0.6	1	0.4	0.8
2014-01-23	16	0.1	0.5	1.2	-99	-99	0.9	1	0.9	0.5	-99	-99	0.8	-99	-99	0.7	-99	0.7	0.4	1.1	0.7	0.9	-99	0.7	1.1	0.4	0.7
2014-01-23	17	0.1	0.5	1.1	-99	-99	0.6	0.8	1.1	0.7	-99	-99	1.1	-99	-99	0.5	-99	0.5	0.4	0.9	0.6	0.7	-99	0.8	1.3	0.4	0.7
2014-01-23	18	0.2	0.5	1.2	-99	-99	0.8	1	1.2	0.9	-99	-99	0.7	-99	-99	0.7	-99	0.7	0.5	0.8	0.8	0.9	-99	0.7	1.1	0.4	0.7
2014-01-23	19	0.5	0.9	2	-99	-99	1.1	2.3	2	2.3	-99	-99	1.3	-99	-99	0.8	-99	0.7	1.2	1.8	1	2.2	-99	1.1	1	1.2	0.8
2014-01-23	20	0.2	0.9	2.7	-99	-99	1.4	3.2	2.9	2.1	-99	-99	1.6	-99	-99	0.8	-99	1	1.5	2.2	1.5	3.1	-99	0.9	2.2	0.9	1.6
2014-01-23	21	0.1	0.9	2.5	-99	-99	1.2	2	2.9	2.8	-99	-99	1.8	-99	-99	1	-99	1.1	1.4	3.2	1.8	1.6	-99	1	2.8	0.7	1
2014-01-23	22	0.1	0.6	1.2	-99	-99	0.9	0.8	1.4	3.3	-99	-99	1.2	-99	-99	1.2	-99	0.6	1.1	2.6	1.3	1.1	-99	1.6	1.6	0.6	0.8
2014-01-23	23	0	0.5	1	-99	-99	0.9	0.6	0.9	1.1	-99	-99	1	-99	-99	0.9	-99	0.7	0.6	3	1.3	0.8	-99	1.9	2	0.5	0.7
2014-01-23	24	0	0.9	0.7	-99	-99	0.7	0.4	0.7	0.7	-99	-99	0.9	-99	-99	0.4	-99	0.4	0.5	1.2	1.1	0.5	-99	-99	1.3	0.5	0.3
2014-01-24	1	0	0.4	0.6	-99	-99	0.5	0.3	0.5	0.3	-99	-99	0.5	-99	-99	0.3	-99	0.4	0.5	0.7	0.8	0.4	-99	-99	0.7	0.4	0.3
2014-01-24	2	0	0.3	0.5	-99	-99	0.4	0.3	0.5	0.2	-99	-99	0.4	-99	-99	0.2	-99	0.2	0.4	0.5	0.4	0.4	-99	-99	0.4	0.3	0.4
2014-01-24	3	0	0.3	0.4	-99	-99	0.3	0.4	0.4	0.2	-99	-99	0.3	-99	-99	0.1	-99	0.2	0.5	0.4	0.3	0.3	-99	-99	0.5	0.3	0.3
2014-01-24	4	0	0.3	0.4	-99	-99	0.3	0.3	0.4	0.2	-99	-99	0.3	-99	-99	0.2	-99	0.2	0.9	0.3	0.3	0.3	-99	-99	0.5	0.3	0.5
2014-01-24	5	0	0.3	0.4	-99	-99	0.3	0.3	0.4	0.1	-99	-99	0.3	-99	-99	0.1	-99	0.2	0.2	0.3	0.4	0.3	-99	-99	0.4	0.3	0.5
2014-01-24	6	0.1	0.4	0.4	-99	-99	0.4	0.3	0.5	0.2	-99	-99	0.6	-99	-99	0.1	-99	0.3	0.2	0.4	0.4	0.4	-99	0.4	0.5	0.4	0.5
2014-01-24	7	0.2	0.6	0.8	-99	-99	0.5	0.4	0.6	0.4	-99	-99	1.1	-99	-99	0.2	-99	0.3	1	0.8	0.5	0.8	-99	0.5	0.8	0.6	0.5
2014-01-24	8	0.7	0.8	1.2	-99	-99	0.6	0.6	0.8	0.8	-99	-99	1.4	-99	-99	0.3	-99	0.3	0.9	1.2	0.7	1.1	-99	0.8	0.8	0.6	0.5
2014-01-24	9	0.8	0.8	1	-99	-99	0.6	0.8	0.9	0.8	-99	-99	1.2	-99	-99	0.4	-99	0.4	0.6	1.3	1	1.1	-99	0.8	0.7	0.6	0.6
2014-01-24	10	0.2	0.5	0.9	-99	-99	0.6	0.6	0.9	0.7	-99	-99	0.8	-99	-99	0.4	-99	0.4	0.5	1.1	0.8	1.1	-99	0.9	0.9	0.5	0.6
2014-01-24	11	0.1	0.5	0.9	-99	-99	0.5	0.7	0.9	0.7	-99	-99	1.1	-99	-99	0.3	-99	-99	0.5	0.6	-99	0.9	-99	0.7	0.9	0.8	0.6
2014-01-24	12	0.2	0.6	0.9	-99	-99	0.7	0.8	1	0.7	-99	-99	1.3	-99	-99	0.3	-99	-99	0.8	0.8	-99	0.9	-99	0.7	1	0.6	0.8
2014-01-24	13	0.2	0.7	1	-99	-99	0.8	0.9	1.1	0.7	-99	-99	1.4	-99	-99	0.4	-99	-99	0.9	1.3	-99	0.9	-99	0.7	0.9	0.7	1
2014-01-24	14	0.1	0.7	1.1	-99	-99	0.7	1.1	1.1	0.7	-99	-99	1.3	-99	-99	0.5	-99	-99	0.9	0.8	-99	0.8	-99	0.7	1.1	0.8	1
2014-01-24	15	0.2	0.6	1	-99	-99	0.6	1	1	0.6	-99	-99	1.1	-99	-99	0.5	-99	-99	0.9	0.8	-99	0.8	-99	0.6	0.9	0.7	0.8
2014-01-24	16	0.1	0.6	0.9	-99	-99	0.7	0.9	1	0.7	-99	-99	0.8	-99	-99	0.4	-99	0.6	0.4	0.8	0.4	0.8	-99	0.6	0.9	0.6	0.7
2014-01-24	17	0.2	0.6	0.9	-99	-99	0.7	1	0.9	0.8	-99	-99	0.6	-99	-99	0.4	-99	0.5	0.4	0.7	0.3	0.8	-99	0.4	0.9	0.6	0.6
2014-01-24	18	0.2	0.8	0.9	-99	-99	0.8	1.4	0.8	0.6	-99	-99	0.7	-99	-99	0.5	-99	0.6	0.4	0.7	0.5	1	-99	0.5	1	0.6	0.5
2014-01-24	19	0.5	0.8	1.6	-99	-99	1.1	2.1	1.3	1	-99	-99	1	-99	-99	0.7	-99	0.9	0.7	1.3	0.6	2	-99	0.6	0.8	0.9	0.8
2014-01-24	20	0.3	0.8	1.6	-99	-99	1.8	0.8	1.5	0.9	-99	-99	1.2	-99	-99	0.7	-99	1	0.8	1	-99	1.1	-99	0.6	1	0.9	0.9
2014-01-24	21	0.9	0.6	1.4	-99	-99	0.9	0.6	1.7	1.3	-99	-99	1.4	-99	-99	1.2	-99	1.1	1.1	1.3	0.8	1.1	-99	0.6	1	0.9	0.9
2014-01-24	22	0.7	0.5	1	-99	-99	0.9	0.5	1.2	1.4	-99	-99	1.5	-99	-99	1.2	-99	1	1.9	1.6	1.2	1.1	-99	1	1.3	0.7	1.2
2014-01-24	23	0.4	0.5	1	-99	-99	1	0.6	1.1	0.9	-99	-99	1.1	-99	-99	0.8	-99	0.7	2.2	1.1	1.1	0.8	-99	0.9	1.4	0.7	1.6
2014-01-24	24	0.3	0.4	0.7	-99	-99	0.8	0.5	0.9	0.6	-99	-99	0.9	-99	-99	1	-99	0.7	1	1.1	1.9	0.6	-99	0.8	1.4	0.5	1.6
2014-01-25	1	0.2	0.4	0.7	-99	-99	0.8	0.7	0.7	0.5	-99	-99	0.7	-99	0.5	0.7	-99	0.5	0.7	1	1.1	0.5	-99	0.8	0.9	0.6	1.2
2014-01-25	2	0.2	0.6	0.7	-99	-99	0.8	1.1	0.8	0.6	-99	-99	0.7	-99	0.3	0.5	-99	0.5	0.8	1.6	0.7	0.7	-99	1.1	0.6	0.6	1
2014-01-25	3	0.2	0.7	0.9	-99	-99	0.7	0.8	1.1	0.7	-99	-99	1	-99	0.3	0.5	-99	0.4	0.7	1.7	0.7	0.9	-99	1	0.6	0.5	1.1
2014-01-25	4	0.3	0.8	1.3	-99	-99	0.6	0.7	1.1	0.8	-99	-99	1	-99	0.4	0.4	-99	0.4	0.6	1.4	0.8	0.9	-99	1	0.6	0.7	1
2014-01-25	5	0.3	0.8	1.2	-99	-99	0.6	0.8	1	0.8	-99	-99	0.9	-99	0.7	0.3	-99	0.3	0.6	1.4	0.6	0.8	-99	0.9	0.8	0.7	0.7
2014-01-25	6	0.3	1.1	0.8	-99	-99	0.8	0.8	1	0.9	-99	-99	1	-99	1.1	0.4	-99	0.4	0.7	1	0.6	0.9	-99	0.9	1.2	0.9	1.4
2014-01-25	7	0.5	1.2	1.2	-99	-99	0.9	1.3	1.1	1.2	-99	-99	1.1	-99	1.1	0.6	-99	0.6	1.4	1.2	1.2	1.2	-99	0.9	2.1	1.2	1.8
2014-01-25	8	0.7	1.7	2.7	-99	-99	1.6	1.8	1.6	2.2	-99	-99	2.2	-99	1.2	0.7	-99	0.8	3.6	2.1	1.9	1.9	-99	1.4	2.6	1.3	2.5
2014-01-25	9	0.7	2.1	2	-99	-99	1.3	1.9	2.2	2.6	-99	-99	2.6	-99	1.4	1.3	-99	0.9	2.2	2.5	1.7	2.8	-99	1.5	2.5	1.6	3
2014-01-25	10	0.5	1.5	1.6	-99	-99	1.4	2.1	2.2	1.5	-99	-99	1.6	-99	1.4	1.2	-99	1.1	1.7	1.9	1.4	2.3	-99	2.2	1.7	1	2.5
2014-01-25	11	0.4	1.3	1.6	-99	-99	0.8	1.8	2.1	1.3	-99	-99	1.6	-99	1	0.9	-99	0.9	1.2	1.7	0.9	1.7	-99	1.8	1.4	1	2.7
2014-01-25	12	0.2	1	1.2	-99	-99	0.7	1.2	1.8	1.1	-99	-99	1.6	-99	0.9	0.6	-99	0.6	1.1	1.4	0.6	1.3	-99	1.3	1.3	0.8	1.9
2014-01-25	13	0.2	0.5	1.1	-99	-99	0.6	0.7	1	0.7	-99	-99	1	-99	0.5	0.5	-99	0.4	0.7	0.8	0.7	0.6	-99	0.7	0.6	0.5	0.7
2014-01-25	14	0.1	0.4	0.9	-99	-99	0.6	0.5	1.1	0.7	-99	-99	0.7	-99	0.3	0.3	-99	0.4	0.3	0.7	0.4	0.6	-99	0.6	0.7	0.4	0.5
2014-01-25	15	0.1	0.2	0.7	-99	-99	0.6	0.5	1	0.6	-99	-99	0.9	-99	0.2	0.5	-99	0.5	0.3	0.9	0.4	0.6	-99	0.6	0.7	0.4	0.4
2014-01-25	16	0.1	0.2	0.6	-99	-99	0.6	0.6	0.8	0.6	-99	-99	0.8	-99	0.2	0.5	-99	0.4	0.3	0.9	0.4	0.7	-99	0.5	0.8	0.4	0.3
2014-01-25	17	0.1	0.3	0.6	-99	-99	0.6	0.5	0.6	0.5	-99	-99	0.7	-99	0.3	0.4	-99	0.4	0.3	0.8	0.4	0.6	-99	0.7	1	0.3	0.4
2014-01-25	18	0.1	0.4	0.8	-99	-99	0.7	0.7	0.6	0.6	-99	-99	0.9	-99	0.5	0.4	-99	0.4	0.3	0.9	0.5	0.5	-99	0.6	0.9	0.4	0.4
2014-01-25	19	0.3	0.5	0.9	-99	-99	0.7	0.6	0.8	0.8	-99	-99	1.5	-99	1.2	0.6	-99	0.5	0.6	1.5	1	0.8	-99	0.9	1.4	0.7	0.3
2014-01-25	20	0.2	0.6	1	-99	-99	0.7	0.6	1.1	1.1	-99	-99	1.4	-99	1	0.7	-99	1	0.6	1.7	1.1	0.9	-99	1.1	1.4	0.7	0.4
2014-01-25	21	0.1	0.6	0.7	-99	-99	0.8	0.5	0.7	0.7	-99	-99	0.6	-99	0.8	0.6	-99	1.1	0.4	1.6	0.9	0.7	-99	1	0.8	0.9	0.9
2014-01-25	22	0.1	0.8	0.9	-99	-99	0.7	0.9	0.7	0.6	-99	-99	0.7	-99	0.7	0.6	-99	0.5	0.5	0.8	0.9	1	-99	0.7	0.8	1	0.9
2014-01-25	23	0.2	0.5	1.4	-99	-99	0.8	0.6	0.9	0.7	-99	-99	1.1	-99	1.1	0.8	-99	0.6	0.8	1.2	0.8	1	-99	0.9	1.1	1.1	0.5
2014-01-25	24	0.3	0.4	1.4	-99	-99	1.4	0.8	0.9	0.8	-99	-99	1.3	-99	1.4	0.5	-99	-99	1.1	1	0.8	0.9	-99	1.5	1.3	1.5	1.4
2014-01-26	1	0.5	0.3	0.9	-99	-99	1.4	0.8	1	1	-99	-99	1.4	-99	1.2	0.4	-99	-99	0.9	1.1	1	0.6	-99	1.7	1.2	1.6	1
2014-01-26	2	0.4	0.3	1.1	-99	-99	1.1	0.7	0.8	0.8	-99	-99	0.9	-99	1	0.4	-99	-99	0.8	2	1.3	0.6	-99	1.5	1.2	1.6	1.5
2014-01-26	3	0.4	0.4	0.9	-99	-99	0.8	0.5	0.9	0.8	-99	-99	1.1	-99	0.6	0.2	-99	-99	0.9	1.2	0.6	0.7	-99	1.1	1.4	1.5	1.4
2014-01-26	4	0.3	0.5	0.9	-99	-99	0.4	0.6	1.4	1.4	-99	-99	1.8	-99	1	0.2	-99	-99	0.9	0.9	0.6	0.6	-99	1	1.7	1.4	1.3
2014-01-26	5	0.3	0.5	1	-99	-99	0.5	0.6	1.4	1.2	-99	-99	1.6	-99	1.4	0.2	-99	-99	0.8	1.2	0.9	0.5	-99	0.8	1.2	1.2	1.4
2014-01-26	6	0.3	0.5	1.1	-99	-99	0.6	0.6	1.6	1.1	-99	-99	1.7	-99	1	0.3	-99	0.3	1.2	1.2	0.5	0.5	-99	0.8	1.2	0.9	1.8
2014-01-26	7	0.4	0.9	1.5	-99	-99	0.6	0.8	1.3	1.2	-99	-99	2.9	-99	1.1	0.4	-99	0.4	1.9	1.1	1	0.7	-99	0.9	1.4	1	1
2014-01-26	8	0.6	1.1	1.6	-99	-99	0.9	1.2	1.6	2.7	-99	-99	2.9	-99	1.9	0.7	-99	0.5	2	1.3	0.6	1.2	-99	1	1.8	1.7	1.4
2014-01-26	9	0.7	1.1	1.7	-99	-99	0.8	1.6	2.6	3	-99	-99	2.2	-99	2.9	0.8	-99	0.5	1.5	1.6	1.8	1.9	-99	1.2	1.7	1.8	2.5
2014-01-26	10	0.5	1.2	2	-99	-99	1	2.3	2.4	2.4	-99	-99	1.7	-99	2.9	0.7	-99	0.8	1.1	1.6	1.1	1.4	-99	0.8	1.2	1.2	2.3
2014-01-26	11	0.4	1	1.6	-99	-99	0.7	1.8	1.7	1.3	-99	-99	1.6	-99	2.2	0.5	-99	0.9	1.2	1	0.7	1	-99	0.6	0.9	1.1	1.4
2014-01-26	12	0.3	0.8	1.2	-99	-99	0.6	1.2	1.3	1.1	-99	-99	1.2	-99	1	0.4	-99	0.7	0.7	0.7	0.3	1	-99	0.7	0.9	0.9	1
2014-01-26	13	0.3	0.5	0.8	-99	-99	0.6	0.7	0.7	0.5	-99	-99	0.6	-99	0.3	0.3	-99	0.7	0.4	0.7	0.6	0.7	-99	0.7	0.7	0.4	0.8
2014-01-26	14	0.1	0.4	0.7	-99	-99	0.7	0.7	0.7	0.4	-99	-99	0.7	-99	0.1	0.4	-99	0.6	0.4	0.7	0.5	0.5	-99	0.6	0.8	0.3	0.5
2014-01-26	15	0.1	0.4	0.7	-99	-99	0.7	0.6	0.8	0.5	-99	-99	0.7	-99	0.3	0.4	-99	0.5	0.5	0.6	0.5	0.6	-99	0.5	0.9	0.4	0.5
2014-01-26	16	0.1	0.4	0.6	-99	-99	0.7	0.7	0.7	0.6	-99	-99	0.7	-99	0.5	0.4	-99	0.5	0.4	0.7	0.4	0.4	-99	0.6	1.1	0.4	0.5
2014-01-26	17	0.1	0.3	0.6	-99	-99	0.7	0.8	0.6	0.4	-99	-99	0.6	-99	0.4	0.3	-99	0.5	0.3	0.6	0.4	0.5	-99	0.5	1.2	0.3	0.5
2014-01-26	18	0.2	0.4	0.6	-99	-99	0.6	1.2	0.7	0.5	-99	-99	0.7	-99	0.5	0.3	-99	0.5	0.4	0.7	0.3	0.5	-99	0.6	1	0.4	0.7
2014-01-26	19	0.3	0.6	0.9	-99	-99	0.7	1.1	0.8	1	-99	-99	0.8	-99	0.6	0.4	-99	0.5	0.6	0.9	0.3	0.8	-99	0.6	0.8	0.7	0.8
2014-01-26	20	0.3	0.4	0.9	-99	-99	0.7	1.3	0.7	0.8	-99	-99	0.9	-99	0.8	0.3	-99	0.6	0.8	0.9	0.7	0.7	-99	0.8	0.8	1.1	1.1
2014-01-26	21	0.3	0.7	1.2	-99	-99	0.7	1.9	0.8	0.6	-99	-99	1.2	-99	0.7	0.3	-99	0.5	1	1.1	0.9	0.7	-99	0.9	1.3	1	0.9
2014-01-26	22	0.6	0.6	1.6	-99	-99	0.7	2.4	0.9	1.2	-99	-99	1.1	-99	0.8	0.6	-99	0.6	1.5	1.1	0.7	1.5	-99	0.9	1.5	1.5	1
2014-01-26	23	0.7	1	2.2	-99	-99	0.6	2.1	1.2	1.4	-99	-99	1.7	-99	0.6	0.6	-99	0.5	1.6	0.9	0.7	1.5	-99	0.8	1.3	1.8	1.5
2014-01-26	24	0.7	0.7	1.9	-99	-99	0.5	1.5	1.1	1.2	-99	-99	1.7	-99	0.5	0.3	-99	0.4	1.7	1	0.8	-99	-99	0.9	0.9	1.7	1.9
2014-01-27	1	0.6	0.7	1	-99	-99	0.5	0.8	1	0.7	-99	-99	1.4	-99	0.9	0.3	-99	0.3	2.2	1.6	0.6	-99	-99	0.9	0.6	1.6	1.5
2014-01-27	2	0.5	0.6	0.8	-99	-99	0.4	0.7	1.2	0.6	-99	-99	1	-99	0.7	0.2	-99	0.3	1.8	2	0.7	-99	-99	0.9	0.6	1.3	1.6
2014-01-27	3	0.4	0.5	0.7	-99	-99	0.4	0.6	1.3	0.6	-99	-99	1	-99	0.7	0.2	-99	0.3	1.9	1.3	0.5	-99	-99	0.8	0.5	1.1	1.7
2014-01-27	4	0.3	0.5	0.7	-99	-99	0.4	0.5	1.3	0.6	-99	-99	1.2	-99	0.7	0.2	-99	0.3	1.8	0.9	0.5	-99	-99	0.7	0.5	1	1
2014-01-27	5	0.3	0.5	0.8	-99	-99	0.4	0.7	1.1	0.6	-99	-99	1.5	-99	0.9	0.2	-99	0.3	1	0.7	0.5	-99	-99	0.7	0.6	1	1
2014-01-27	6	0.4	0.8	1.3	-99	-99	0.5	1	1	1	-99	-99	1.7	-99	1.5	0.2	-99	0.3	1.6	0.7	0.6	-99	-99	0.7	0.8	1.6	2.3
2014-01-27	7	0.6	1.9	2.6	-99	-99	1.2	2.3	1.2	1.7	-99	-99	2.3	-99	2.1	0.8	-99	0.7	1.6	1.2	2	-99	-99	1.2	3.1	1.7	3.7
2014-01-27	8	0.9	2.8	3.8	-99	-99	1	4.4	2.1	2.9	-99	-99	3.2	-99	3.3	0.8	-99	0.9	5.7	2.9	1.6	-99	-99	2.2	3	3	5
2014-01-27	9	0.9	3.5	4	-99	-99	1	3.4	2.4	2.9	-99	-99	3.8	-99	2.6	1.1	-99	0.8	4.2	3.5	2.3	-99	-99	2.5	3.1	2.6	4.5
2014-01-27	10	0.6	1.7	2.7	-99	-99	1	1.8	2.6	3.7	-99	-99	3.1	-99	1.8	1.4	-99	0.8	2.2	2.7	0.9	-99	-99	1.7	4	2.5	3.7
2014-01-27	11	0.4	1.2	2.1	-99	-99	1	1.6	2.3	2.4	-99	-99	1.9	-99	1.2	1.2	-99	1.1	1.2	1.6	0.9	-99	-99	1.7	2.2	1.5	2.3
2014-01-27	12	0.2	1.2	1.6	-99	-99	1.1	1.1	1	0.7	-99	-99	0.7	-99	0.5	0.8	-99	1	0.5	1	0.5	-99	-99	1.4	0.7	0.6	1.1
2014-01-27	13	0.2	0.9	1.1	-99	-99	1	1.4	0.9	0.5	-99	-99	0.7	-99	0.2	0.7	-99	1	0.4	1.2	0.6	-99	-99	0.8	0.6	0.7	0.8
2014-01-27	14	0.2	0.8	1	-99	-99	1.1	1.4	0.9	0.5	-99	-99	0.7	-99	0.1	0.7	-99	0.9	0.4	0.8	0.6	-99	-99	0.7	0.7	0.7	0.8
2014-01-27	15	0.2	0.8	1	-99	-99	1	1.3	1	0.6	-99	-99	0.8	-99	0.3	0.6	-99	0.9	0.4	0.7	0.4	-99	-99	0.6	0.8	0.6	0.9
2014-01-27	16	0.2	0.8	1	-99	-99	0.9	1.3	0.9	0.5	-99	-99	0.8	-99	0.5	0.4	-99	0.7	0.5	0.6	0.4	-99	-99	0.6	1	0.6	0.8
2014-01-27	17	0.3	0.7	1	-99	-99	0.7	1.2	0.9	0.6	-99	-99	1	-99	0.5	0.3	-99	0.5	0.5	0.6	0.3	-99	-99	0.5	0.9	0.7	0.9
2014-01-27	18	0.4	0.8	1.2	-99	-99	0.7	2	0.9	0.5	-99	-99	0.9	-99	0.5	0.3	-99	0.5	0.6	0.7	0.3	-99	-99	0.5	0.9	0.7	1.3
2014-01-27	19	0.4	1.2	1	-99	-99	0.7	1.7	1.1	0.7	-99	-99	0.8	-99	0.7	0.5	-99	0.5	0.7	0.8	0.3	-99	-99	0.6	0.8	1	1.1
2014-01-27	20	0.3	0.5	1.1	-99	-99	0.7	1	1.1	1.1	-99	-99	1.2	-99	0.9	0.8	-99	0.6	0.8	1	0.3	-99	-99	0.6	0.8	1.1	1.5
2014-01-27	21	0.5	0.4	1.1	-99	-99	0.7	1.1	0.9	1.2	-99	-99	1.6	-99	1	0.9	-99	0.5	1.1	1.4	0.7	-99	-99	0.7	0.9	1.4	1.5
2014-01-27	22	0.4	0.6	1.1	-99	-99	0.6	2	0.9	1.6	-99	-99	1.2	-99	1.1	0.8	-99	0.5	1.5	1.8	1.1	-99	-99	0.9	1.1	1.2	1.8
2014-01-27	23	0.4	0.6	1.5	-99	-99	0.6	1	0.9	1	-99	-99	1.6	-99	0.7	0.6	-99	0.4	1.3	1.5	0.7	-99	-99	1	1.1	1.2	1.4
2014-01-27	24	0.3	0.3	1.6	-99	-99	-99	0.5	1.2	1	-99	-99	-99	-99	0.6	0.4	-99	0.5	1.2	1.1	1	-99	-99	0.9	0.9	1.2	1.4
2014-01-28	1	0.3	0.3	0.7	-99	-99	-99	0.5	0.8	1.1	-99	-99	-99	-99	0.5	0.4	-99	0.4	1.1	1.3	1.2	-99	-99	0.9	0.8	0.8	1.2
2014-01-28	2	0.2	0.3	0.7	-99	-99	-99	0.5	0.7	0.6	-99	-99	-99	-99	0.7	0.2	-99	0.3	0.6	0.9	0.6	-99	-99	1	1	0.8	0.7
2014-01-28	3	0.2	0.3	0.8	-99	-99	-99	0.4	0.7	0.6	-99	-99	-99	-99	0.8	0.2	-99	0.3	0.4	0.9	0.4	-99	-99	0.8	0.9	0.8	0.6
2014-01-28	4	0.2	0.3	0.8	-99	-99	-99	0.4	1	0.7	-99	-99	-99	-99	0.9	0.2	-99	0.3	0.4	0.7	0.5	-99	-99	0.7	0.5	0.8	0.9
2014-01-28	5	0.1	0.4	0.9	-99	-99	-99	0.5	1	0.6	-99	-99	-99	-99	0.6	0.1	-99	0.3	0.6	0.8	0.3	-99	-99	0.6	0.5	0.8	1.1
2014-01-28	6	0.2	0.7	1	-99	-99	0.4	0.7	1.1	0.8	-99	-99	1.7	-99	1.1	0.2	-99	0.3	2.2	1	1	-99	-99	0.7	0.5	1.1	1.7
2014-01-28	7	0.5	2.1	1.8	-99	-99	0.6	1.7	1.4	1.6	-99	-99	2.1	-99	1.9	0.4	-99	0.5	3	1.8	0.6	-99	-99	1.1	1.3	1.6	2
2014-01-28	8	0.9	3.7	3.4	-99	-99	1	4.6	2.6	3.7	-99	-99	3.1	-99	3	1	-99	0.8	3.1	3.2	1.1	-99	-99	1.3	2.7	2.2	4.8
2014-01-28	9	0.9	3.1	3	-99	-99	0.7	3.8	3.1	4.1	-99	-99	3.1	-99	2.1	1.4	-99	0.8	3.6	2.4	3.4	-99	-99	1.5	3.7	2.7	4.5
2014-01-28	10	0.6	1.8	3.1	-99	-99	0.5	3.2	3	2.8	-99	-99	2.4	-99	2.4	1.9	-99	0.8	1.4	1.1	1	-99	-99	1.1	1.8	2.6	2.6
2014-01-28	11	0.4	1.5	2	-99	-99	0.7	3	2.6	1.3	-99	-99	2.1	-99	0.7	0.7	-99	1	-99	1.2	0.3	-99	-99	0.7	1.4	2.3	1.3
2014-01-28	12	0.3	1.1	1.5	-99	-99	0.7	2	1.3	0.5	-99	-99	1	-99	0.2	0.6	-99	0.7	-99	0.6	0.2	-99	-99	0.4	0.3	0.9	0.8
2014-01-28	13	0.1	1	0.9	-99	-99	0.5	0.9	0.7	0.3	-99	-99	0.5	-99	0.1	0.5	-99	0.6	-99	0.4	0.2	-99	-99	0.4	0.3	0.8	0.5
2014-01-28	14	0.1	0.7	0.7	-99	-99	0.4	0.4	0.8	0.4	-99	-99	0.5	-99	0.2	0.3	-99	0.5	-99	0.5	0.1	-99	-99	0.4	0.5	0.8	0.5
2014-01-28	15	0.1	0.4	0.6	-99	-99	0.4	0.4	0.7	0.4	-99	-99	0.6	-99	0.2	0.2	-99	0.3	0.3	0.5	0.2	-99	-99	0.4	0.5	0.6	0.5
2014-01-28	16	0.1	0.3	0.6	-99	-99	0.4	0.5	0.7	0.4	-99	-99	0.6	-99	0.2	0.2	-99	0.3	0.4	0.5	0.2	0.4	-99	0.4	0.5	0.7	0.7
2014-01-28	17	0.1	0.4	0.5	-99	-99	0.4	0.5	0.6	0.4	-99	-99	0.9	-99	0.3	0.1	-99	0.3	0.5	0.5	0.2	0.5	-99	0.4	0.6	0.6	0.7
2014-01-28	18	0.2	0.4	0.6	-99	-99	0.4	0.5	0.7	0.5	-99	-99	0.9	-99	0.4	0.2	-99	0.3	0.6	0.4	0.2	0.6	-99	0.5	0.6	0.6	0.6
2014-01-28	19	0.2	0.5	0.6	-99	-99	0.5	0.7	0.8	0.6	-99	-99	1.2	-99	0.6	0.2	-99	0.4	0.6	0.7	0.3	0.6	-99	0.5	0.6	0.6	0.5
2014-01-28	20	0.2	0.4	0.7	-99	-99	0.4	0.7	1	0.8	-99	-99	0.9	-99	0.8	0.2	-99	0.4	0.6	0.7	0.3	0.6	-99	0.5	0.6	0.9	1
2014-01-28	21	0.2	0.5	0.8	-99	-99	0.4	0.7	1	0.7	-99	-99	0.9	-99	0.7	0.2	-99	0.3	-99	0.7	-99	0.4	-99	0.6	0.6	1	1.5
2014-01-28	22	0.1	0.8	0.9	-99	-99	0.4	0.7	1.1	0.8	-99	-99	0.8	-99	0.5	0.5	-99	0.3	-99	0.3	-99	0.4	-99	0.5	0.6	1	1.4
2014-01-28	23	0.1	0.6	0.6	-99	-99	0.4	0.9	0.9	0.6	-99	-99	1	-99	0.3	0.6	-99	0.2	-99	0.5	-99	0.7	-99	0.6	0.5	0.9	1
2014-01-28	24	0.2	0.5	0.6	-99	-99	0.3	0.5	-99	1.2	-99	-99	0.7	-99	-99	-99	-99	0.3	-99	0.6	-99	0.8	-99	0.4	0.5	0.7	0.6
2014-01-29	1	0.2	0.5	0.8	-99	-99	0.3	0.3	-99	0.7	-99	-99	0.9	-99	-99	-99	-99	0.2	-99	0.5	-99	0.3	-99	0.3	0.4	0.7	0.6
2014-01-29	2	0.1	0.3	0.8	-99	-99	0.2	0.3	-99	0.3	-99	-99	0.9	-99	-99	-99	-99	0.2	-99	0.3	-99	0.3	-99	0.3	0.3	0.6	0.7
2014-01-29	3	0.1	0.4	1	-99	-99	0.2	0.3	-99	0.1	-99	-99	0.4	-99	0	-99	-99	0.2	-99	0.3	-99	0.3	-99	0.3	0.2	0.5	0.7
2014-01-29	4	0.2	0.4	0.5	-99	-99	0.2	0.3	-99	0.2	-99	-99	0.5	-99	0	-99	-99	0.2	-99	0.3	-99	0.3	-99	0.3	0.2	0.5	0.5
2014-01-29	5	0.2	0.6	0.4	-99	-99	0.2	0.3	-99	0.5	-99	-99	0.7	-99	0	-99	-99	0.2	-99	0.3	-99	0.3	-99	0.3	0.2	0.5	1.1
2014-01-29	6	0.3	0.6	0.7	-99	-99	0.2	0.4	0.8	1.2	-99	-99	0.9	-99	0.1	0.3	-99	0.4	-99	0.4	-99	0.7	-99	0.3	0.3	0.6	1.7
2014-01-29	7	0.4	1.6	1.9	-99	-99	0.6	1.3	1.1	1.9	-99	-99	1.3	-99	-99	0.5	-99	0.5	-99	1.6	-99	1.1	-99	0.4	0.4	0.8	3.3
2014-01-29	8	0.6	2	4.6	-99	-99	1.1	3.8	2	2.4	-99	-99	3	-99	-99	1.2	-99	0.9	-99	3.4	-99	2	-99	1.2	1	1.1	3
2014-01-29	9	0.9	2.1	5.4	-99	-99	1.1	3.1	2.4	1.9	-99	-99	3.7	-99	4.1	1.6	-99	1.4	-99	2.2	-99	2.7	-99	1	0.8	1.9	2.7
2014-01-29	10	0.7	1.8	3.1	-99	-99	1	3.1	1.4	0.8	-99	-99	2.7	-99	1.1	1.2	-99	1.5	-99	1.1	-99	2.7	-99	0.7	0.5	1.3	1.4
2014-01-29	11	0.4	1.8	1.9	-99	-99	-99	1.8	1.5	0.8	-99	-99	1.7	-99	0.1	0.7	-99	1.2	1	0.7	-99	2	-99	0.4	0.3	0.9	-99
2014-01-29	12	0.3	1.3	1.2	-99	-99	-99	1.7	1.2	0.6	-99	-99	0.9	-99	0.1	0.6	-99	0.6	0.5	0.6	-99	1.3	-99	0.5	-99	0.8	-99
2014-01-29	13	0.1	0.8	1	-99	-99	0.3	1.5	0.9	0.4	-99	-99	0.8	-99	0.1	0.3	-99	0.3	0.4	0.6	-99	1.4	-99	0.4	-99	0.8	-99
2014-01-29	14	0.1	0.4	0.6	-99	-99	0.3	0.5	0.6	0.3	-99	-99	0.9	-99	0.2	0.1	-99	0.3	0.5	0.3	-99	0.7	-99	0.4	-99	1	0.8
2014-01-29	15	0.1	0.3	0.5	-99	-99	0.3	0.5	0.6	0.2	-99	-99	0.8	-99	0.1	0.1	-99	0.3	0.3	0.3	-99	0.4	-99	0.4	0.6	0.8	0.5
2014-01-29	16	0.1	0.3	0.5	-99	-99	0.3	0.4	0.6	0.3	-99	-99	0.9	-99	0.1	0.1	-99	0.3	0.3	0.4	-99	0.4	-99	0.4	0.4	0.6	0.4
2014-01-29	17	0.1	0.2	0.5	-99	-99	0.3	0.5	0.6	0.3	-99	-99	0.8	-99	0.2	0.1	-99	0.3	0.3	0.3	-99	0.4	-99	0.4	0.5	0.5	0.4
2014-01-29	18	0.1	0.2	0.5	-99	-99	0.4	0.5	0.5	0.3	-99	-99	0.8	-99	0.2	0.1	-99	0.3	0.3	0.4	-99	0.5	-99	0.4	0.5	0.5	0.4
2014-01-29	19	0.2	0.3	0.6	-99	-99	0.5	0.9	0.6	0.3	-99	-99	0.8	-99	0.4	0.2	-99	0.4	0.5	0.4	-99	0.6	-99	0.4	0.4	0.6	0.5
2014-01-29	20	0.2	0.4	0.8	-99	-99	0.5	0.9	0.7	0.4	-99	-99	0.9	-99	0.5	0.2	-99	0.4	0.5	0.4	-99	0.6	-99	0.5	0.5	0.7	0.7
2014-01-29	21	0.2	0.6	0.6	-99	-99	0.5	1.2	0.8	0.4	-99	-99	1.2	-99	0.5	0.4	-99	0.4	0.6	0.6	-99	0.6	-99	0.5	0.4	0.6	0.6
2014-01-29	22	0.2	0.4	0.5	-99	-99	0.4	0.9	0.7	0.7	-99	-99	1.2	-99	0.5	0.2	-99	0.5	0.8	0.5	-99	0.6	-99	0.5	0.4	0.6	0.6
2014-01-29	23	0.4	0.4	0.8	-99	-99	0.4	0.9	0.9	0.4	-99	-99	0.9	-99	0.7	0.3	-99	0.5	0.7	0.5	-99	0.7	-99	0.4	0.4	0.6	0.7
2014-01-29	24	-99	0.3	0.6	-99	-99	0.3	0.6	0.7	0.5	-99	-99	1.2	-99	0.5	0.2	-99	0.4	0.6	0.3	-99	0.4	-99	0.5	0.3	0.5	-99
2014-01-30	1	-99	0.3	0.5	-99	-99	0.2	0.4	0.7	0.8	-99	-99	0.9	-99	0.4	0.2	-99	0.3	0.8	0.4	-99	0.3	-99	0.4	0.3	0.6	-99
2014-01-30	2	-99	0.2	0.6	-99	-99	0.2	0.3	1	0.9	-99	-99	0.8	-99	0.4	0.1	-99	0.3	0.9	0.4	-99	0.3	-99	0.3	0.2	0.5	-99
2014-01-30	3	-99	0.2	0.5	-99	-99	0.2	0.3	1	1	-99	-99	0.6	-99	0.2	0.1	-99	0.2	0.7	0.3	-99	0.4	-99	0.4	0.3	0.4	-99
2014-01-30	4	-99	0.3	0.4	-99	-99	0.2	0.4	0.5	0.8	-99	-99	0.8	-99	0.2	0.1	-99	0.2	0.6	0.3	-99	0.4	-99	0.4	0.4	0.4	-99
2014-01-30	5	-99	0.3	0.5	-99	-99	0.2	0.4	0.4	0.9	-99	-99	0.6	-99	0.7	0.1	-99	0.2	1.1	0.3	-99	0.5	-99	0.4	0.4	0.5	-99
2014-01-30	6	0.3	0.4	0.7	-99	-99	0.2	0.7	0.6	0.8	-99	-99	1.3	-99	0.8	0.1	-99	0.2	1.9	0.5	-99	0.7	-99	0.5	0.6	0.9	1.5
2014-01-30	7	0.8	2.4	1.5	-99	-99	0.8	1.5	1.2	1.5	-99	-99	2.1	-99	2	0.3	-99	0.4	2.7	1.8	-99	1.5	-99	0.8	1.2	1.6	3.2
2014-01-30	8	1.1	3.4	2.6	-99	-99	1.1	2.6	2	2.7	-99	-99	4	-99	2.2	0.7	-99	0.6	5.5	2.7	-99	2.8	-99	1.4	2.5	2.5	6.2
2014-01-30	9	1	2.9	2.7	-99	-99	0.6	2.2	2	2.4	-99	-99	3.8	-99	1.7	1	-99	0.7	3.8	2.5	-99	3.7	-99	1.4	1.8	1.6	4.1
2014-01-30	10	0.4	1.9	2.6	-99	-99	0.3	2	2.9	2.8	-99	-99	3.1	-99	1.2	0.8	-99	0.6	2	1.8	-99	2.3	-99	0.8	1.7	1.5	2.5
2014-01-30	11	0.2	1.6	2.3	-99	-99	0.8	1.4	2.7	1.5	-99	-99	1.3	-99	0.9	0.6	-99	0.8	0.8	0.7	-99	1.9	-99	1.1	1.5	0.8	1
2014-01-30	12	0	0.6	1.6	-99	-99	0.8	1.3	1.4	0.8	-99	-99	0.8	-99	0.3	0.4	-99	0.8	0.5	1.1	-99	1.1	-99	1	0.7	0.6	0.7
2014-01-30	13	0.1	0.5	1.3	-99	-99	0.8	1.2	1.2	0.6	-99	-99	0.8	-99	0.2	0.8	-99	0.7	0.4	1.1	-99	0.7	-99	0.7	0.4	0.5	0.7
2014-01-30	14	0.1	0.4	0.9	-99	-99	1	1	1.1	0.7	-99	-99	0.9	-99	0.2	1	-99	1.1	0.5	1	-99	0.7	-99	0.8	0.5	0.5	0.8
2014-01-30	15	0.1	0.3	0.9	-99	-99	0.7	0.5	1	0.6	-99	-99	0.8	-99	0.3	0.9	-99	0.9	0.6	1	-99	0.6	-99	0.8	-99	0.3	0.7
2014-01-30	16	0.1	0.4	0.9	-99	-99	0.5	0.5	1	0.6	-99	-99	0.8	-99	0.3	0.7	-99	0.5	0.5	0.8	-99	0.7	-99	0.6	0.6	0.3	0.5
2014-01-30	17	0.1	0.3	0.9	-99	-99	0.4	0.6	1	0.7	-99	-99	0.8	-99	0.2	0.6	-99	0.4	0.5	0.7	-99	0.8	-99	0.6	0.7	0.3	0.6
2014-01-30	18	0.1	0.4	0.9	-99	-99	0.5	0.8	0.9	0.8	-99	-99	0.8	-99	0.2	0.7	-99	0.5	0.5	0.9	-99	1.2	-99	0.7	0.5	0.3	0.5
2014-01-30	19	0.3	0.7	1.4	-99	-99	1	2.5	1	1.3	-99	-99	0.7	-99	0.6	0.9	-99	1	0.9	1.2	-99	1.2	-99	0.7	0.7	0.6	0.7
2014-01-30	20	0.7	0.8	2.2	-99	-99	1.6	2.4	1.7	1.2	-99	-99	1.3	-99	0.6	1	-99	1.2	1.3	1	-99	1.7	-99	0.8	0.7	0.9	1.4
2014-01-30	21	0.3	0.7	1.8	-99	-99	0.6	2.5	1.8	1.2	-99	-99	1.5	-99	0.7	1.2	-99	1.1	1.2	2	-99	2.5	-99	0.9	0.9	1.1	1.5
2014-01-30	22	0.7	1.3	2.8	-99	-99	0.5	3.4	2.2	1.2	-99	-99	1.7	-99	0.6	1.3	-99	0.9	1.5	2.3	-99	2.1	-99	1.1	1.3	1.4	1.8
2014-01-30	23	0.4	0.5	1.7	-99	-99	0.5	2.3	1.5	1.2	-99	-99	1.8	-99	0.7	0.8	-99	0.7	2.1	1.7	-99	2.2	-99	0.8	1.3	2	1.6
2014-01-30	24	0.7	0.4	1.2	-99	-99	0.5	1	1.4	1.3	-99	-99	2.4	-99	0.6	0.6	-99	0.5	1.8	1.4	-99	1.5	-99	-99	1.2	1.9	1.9
2014-01-31	1	0.5	0.4	0.9	-99	-99	0.4	0.9	1.5	1	-99	-99	1.8	-99	1.5	0.4	-99	0.4	1.2	1.2	1.7	1.1	-99	-99	1	1.9	1.6
2014-01-31	2	0.5	0.7	0.8	-99	-99	0.3	0.7	1.5	1	-99	-99	1.3	-99	0.9	0.3	-99	0.4	0.9	1.9	1.1	0.8	-99	-99	0.8	1.6	2.1
2014-01-31	3	0.3	0.5	0.8	-99	-99	0.3	0.5	1.8	0.8	-99	-99	1.6	-99	0.7	0.2	-99	0.3	1.1	1.3	0.6	0.7	-99	-99	0.7	1	1.4
2014-01-31	4	0.3	0.4	0.9	-99	-99	0.3	0.5	1.3	0.7	-99	-99	1.7	-99	0.7	0.3	-99	0.4	0.8	0.7	0.3	0.6	-99	-99	0.6	0.8	1.5
2014-01-31	5	0.3	0.4	1.1	-99	-99	0.4	0.7	1	0.7	-99	-99	1.6	-99	0.6	0.3	-99	0.3	1.3	0.8	0.4	0.6	-99	-99	0.6	1	1.5
2014-01-31	6	0.3	0.6	1.5	-99	-99	0.5	0.8	0.9	1.1	-99	-99	2.2	-99	1	0.3	-99	0.4	2.1	1.3	0.7	0.9	-99	0.9	0.8	1.2	2.6
2014-01-31	7	0.6	1.4	2.3	-99	-99	1.1	1.8	1.7	2.1	-99	-99	2.3	-99	2.4	0.5	-99	0.6	3.9	2.4	1	1.5	-99	1	2.4	1.5	2.7
2014-01-31	8	0.9	2.1	3.1	-99	-99	2	3.2	2.9	2.8	-99	-99	3.4	-99	3.2	0.7	-99	0.9	4.4	3.8	1.9	2.4	-99	1.7	3.2	2.1	3.2
2014-01-31	9	0.8	2	3.3	-99	-99	1.4	2	3.3	3.2	-99	-99	3.5	-99	2.6	1	-99	0.7	2.7	2.6	2.6	3.8	-99	1.5	3.2	2.2	4.5
2014-01-31	10	0.6	1.4	3.2	-99	-99	0.9	2.7	2.6	2.5	-99	-99	2.2	-99	1.8	1.6	-99	1	1.8	1.7	1.1	2.3	-99	1	3	1.8	3.4
2014-01-31	11	0.4	-99	2.8	-99	-99	1	2.9	2.1	2.6	-99	-99	1.6	-99	1.2	1.5	-99	1.2	1.1	1.5	0.7	1.8	-99	0.9	1.8	1.4	2
2014-01-31	12	0.2	-99	1.2	-99	-99	1.2	1.8	1.4	1.4	-99	-99	1	-99	0.6	0.6	-99	1.1	0.6	-99	0.5	1.5	-99	0.8	1.5	0.7	1.2
2014-01-31	13	0.2	-99	1	-99	-99	1.2	1.3	1.2	0.8	-99	-99	0.7	-99	0.4	0.6	-99	1.1	0.5	-99	0.5	1.1	-99	0.8	0.8	0.8	1
2014-01-31	14	0.1	-99	0.9	-99	-99	1	1	0.9	0.6	-99	-99	0.7	-99	0.4	0.7	-99	0.9	0.4	-99	0.4	1.1	-99	0.7	0.6	0.6	0.9
2014-01-31	15	0.1	-99	0.8	-99	-99	1	0.9	0.9	0.5	-99	-99	0.8	-99	0.3	0.7	-99	0.9	0.4	0.7	0.3	1.3	-99	0.6	0.6	0.4	0.8
2014-01-31	16	0.2	-99	0.9	-99	-99	0.9	0.9	0.9	0.5	-99	-99	0.9	-99	0.4	0.6	-99	0.9	0.4	0.6	0.3	0.9	-99	0.6	0.6	0.5	0.7
2014-01-31	17	0.2	-99	1	-99	-99	0.9	1.2	0.9	0.4	-99	-99	1	-99	0.4	0.4	-99	0.8	0.5	0.4	0.3	0.9	-99	0.5	0.7	0.6	0.6
2014-01-31	18	0.2	0.7	1	-99	-99	0.7	1.5	0.9	0.8	-99	-99	0.8	-99	0.4	0.3	-99	0.7	0.7	0.5	-99	1	-99	0.6	0.6	0.7	1
2014-01-31	19	0.4	1.3	1.1	-99	-99	0.8	1.4	1.2	0.8	-99	-99	0.9	-99	0.5	0.6	-99	0.9	0.7	0.7	-99	1.2	-99	0.7	0.6	1.1	1
2014-01-31	20	0.5	1.6	1.4	-99	-99	0.7	3.2	1.3	1.1	-99	-99	1.1	-99	0.6	0.7	-99	1	0.9	1	0.6	1.3	-99	0.9	0.7	1.5	1.1
2014-01-31	21	0.6	1.5	1.8	-99	-99	0.7	3.7	1.5	1.3	-99	-99	1.6	-99	0.6	0.9	-99	0.6	1.2	1.7	1	1.4	-99	0.8	1.1	1.2	1.3
2014-01-31	22	0.5	1.2	1.6	-99	-99	0.6	3.7	2.1	1.5	-99	-99	1.6	-99	0.7	0.8	-99	0.6	1.8	2.6	1.8	2.2	-99	0.8	1.4	2	1.5
2014-01-31	23	0.6	0.7	2.3	-99	-99	0.5	3.2	1.5	1.2	-99	-99	2.6	-99	1	0.8	-99	0.7	2	1.6	1.3	2.4	-99	1	1.5	2.6	1.8
2014-01-31	24	0.9	0.9	3.2	-99	-99	0.6	2.3	1.6	1.7	-99	-99	2.3	-99	0.9	0.6	-99	0.6	1.9	1.5	1.1	2.2	-99	1	1.5	2.3	2.7
2014-02-01	1	0.7	1.2	2.2	-99	-99	0.4	1.8	2.1	1.1	-99	-99	2	-99	1	0.5	-99	0.6	2.7	2.3	1.1	2	-99	0.9	1.2	2.5	3.5
2014-02-01	2	0.6	1	1	-99	-99	0.4	1.3	1.6	0.9	-99	-99	1.5	-99	1.1	0.4	-99	0.5	3.8	1.2	0.6	1.2	-99	0.9	1.1	2	2.2
2014-02-01	3	0.6	0.8	0.9	-99	-99	0.3	0.8	1.2	0.7	-99	-99	1.3	-99	1.7	0.4	-99	0.4	2.3	0.7	0.7	1.2	-99	0.8	0.7	1.6	2.7
2014-02-01	4	0.4	0.9	0.9	-99	-99	0.3	1	1	0.8	-99	-99	1.5	-99	1.7	0.5	-99	0.3	2.3	1.1	0.4	1.3	-99	0.7	0.6	1.6	2.2
2014-02-01	5	0.3	1.1	1.2	-99	-99	0.4	1.1	0.9	0.7	-99	-99	1.4	-99	1.3	0.3	-99	0.3	2.3	1.6	0.3	1	-99	0.6	0.6	1.6	2.1
2014-02-01	6	0.3	0.9	1.6	-99	-99	0.4	1.2	1.5	0.8	-99	-99	1.2	-99	1.4	0.2	-99	0.4	1.8	1.6	0.4	1.1	-99	0.7	0.6	1.4	1.7
2014-02-01	7	0.6	1.6	1.8	-99	-99	0.8	2	1.4	1.4	-99	-99	2.2	-99	1.9	0.6	-99	0.5	2.8	1.6	0.6	1.6	-99	0.8	1.4	1.5	3
2014-02-01	8	0.8	2.4	3.1	-99	-99	1	2.7	2	2.1	-99	-99	3.6	-99	1.4	1.1	-99	0.9	3.1	1.6	0.7	2	-99	1.3	2.4	2.1	3.7
2014-02-01	9	0.8	1.7	3	-99	-99	1.9	2.7	2	3.3	-99	-99	3.2	-99	2	1.4	-99	0.7	3.8	1.6	3.1	2.2	-99	1.4	2.5	2.5	5.1
2014-02-01	10	0.6	1.8	2.7	-99	-99	1.1	3	2.7	4	-99	-99	2.8	-99	1.9	1.2	-99	0.8	2.2	1.4	1.3	2	-99	1	2.2	2.6	2.9
2014-02-01	11	0.4	1.5	2.4	-99	-99	0.8	3	2.7	2	-99	-99	2.2	-99	2.4	1.4	-99	1.1	0.9	1.2	0.6	2.2	-99	0.9	2.1	2	1.4
2014-02-01	12	0.3	1.3	1.8	-99	-99	0.7	2.1	1.5	1.2	-99	-99	1.5	-99	1.2	0.7	-99	0.9	1.1	0.7	0.2	1.6	-99	0.7	0.7	1.1	0.9
2014-02-01	13	0.2	0.8	1.3	-99	-99	0.7	1.4	1.1	0.6	-99	-99	0.9	-99	0.5	0.5	-99	0.7	0.9	0.5	0.2	0.9	-99	0.5	0.5	0.8	1
2014-02-01	14	0.2	0.7	1	-99	-99	0.7	1.3	0.9	0.6	-99	-99	0.7	-99	0.2	0.4	-99	0.6	0.6	0.4	0.2	1	-99	0.5	0.7	0.8	0.9
2014-02-01	15	0.2	0.9	0.9	-99	-99	0.6	1.2	0.8	0.4	-99	-99	0.6	-99	0.2	0.3	-99	0.6	0.4	0.4	0.2	1.1	-99	0.5	0.7	0.9	0.7
2014-02-01	16	0.1	0.9	0.9	-99	-99	0.4	1	0.8	0.4	-99	-99	0.5	-99	0.2	0.2	-99	0.4	0.4	0.4	0.2	0.9	-99	0.5	0.7	0.8	0.9
2014-02-01	17	0.1	0.7	0.9	-99	-99	0.4	0.5	0.8	0.5	-99	-99	0.6	-99	0.3	0.2	-99	0.4	0.4	0.4	0.2	0.7	-99	0.6	0.8	0.8	0.7
2014-02-01	18	0.1	0.7	0.9	-99	-99	0.5	0.6	0.7	0.6	-99	-99	0.6	-99	0.4	0.2	-99	0.5	0.5	0.5	0.3	0.7	-99	0.5	0.8	0.7	0.8
2014-02-01	19	0.2	0.7	0.7	-99	-99	0.5	1	0.7	0.9	-99	-99	0.9	-99	0.5	0.3	-99	0.6	0.6	0.7	0.3	1	-99	0.6	0.7	1	0.7
2014-02-01	20	0.4	0.7	0.8	-99	-99	0.5	1.2	0.9	1.1	-99	-99	1.2	-99	0.7	0.4	-99	0.5	-99	1.1	0.8	1.3	-99	0.6	0.8	1.2	1.2
2014-02-01	21	0.4	0.6	0.8	-99	-99	0.4	1.7	0.9	1.1	-99	-99	1.5	-99	0.8	0.8	-99	0.5	-99	1.4	1.3	1.5	-99	0.9	0.9	1.5	2.1
2014-02-01	22	0.4	0.8	1.2	-99	-99	0.4	1.5	1.1	1.3	-99	-99	1.7	-99	0.6	0.8	-99	0.5	1.1	1.1	1.3	2.4	-99	1	1.4	1.1	2.5
2014-02-01	23	0.6	1.1	2.2	-99	-99	0.5	1.8	1.3	1.2	-99	-99	1.5	-99	0.6	0.7	-99	0.6	1	1	1.2	1.9	-99	1	1.4	1.5	1.3
2014-02-01	24	0.7	0.5	2.2	-99	-99	0.5	1.5	1.2	1.2	-99	-99	1.9	-99	0.6	0.7	-99	-99	1.5	0.9	1.4	1.3	-99	0.9	1.2	1.5	1.4
2014-02-02	1	0.6	0.7	1.7	-99	-99	0.5	1.1	1	1.2	-99	-99	1.9	-99	0.7	0.8	-99	-99	2.7	1.4	1.7	1.1	-99	1	0.9	1.9	1.8
2014-02-02	2	0.6	0.9	1	-99	-99	0.6	1.1	1.2	1	-99	-99	1.9	-99	0.6	0.5	-99	-99	2.4	1.5	0.8	0.8	-99	1	1.1	2	1.2
2014-02-02	3	0.5	0.7	0.9	-99	-99	0.5	1.1	1.4	0.9	-99	-99	1.8	-99	0.7	0.4	-99	-99	2	0.8	1	0.8	-99	1	1	2.2	2.4
2014-02-02	4	0.3	0.7	0.9	-99	-99	0.5	0.7	1.4	0.7	-99	-99	1.6	-99	1.8	0.2	-99	-99	1.8	1	0.6	0.7	-99	1	0.8	1.2	2.2
2014-02-02	5	0.4	0.7	0.7	-99	-99	0.4	1	1.2	0.7	-99	-99	1.3	-99	1.6	0.2	-99	-99	1.7	1.4	0.9	0.8	-99	0.9	0.8	1.2	1.2
2014-02-02	6	0.4	0.6	1.1	-99	-99	0.4	0.9	1.5	0.9	-99	-99	1.5	-99	1.6	0.3	-99	0.4	1.4	0.8	0.7	0.7	-99	0.9	0.8	1.5	1.6
2014-02-02	7	0.4	0.7	1.4	-99	-99	0.6	1.3	1.4	1.3	-99	-99	2.1	-99	0.9	0.6	-99	0.7	1.8	0.9	0.8	0.8	-99	0.8	1.2	1.6	3
2014-02-02	8	0.7	1.4	2.1	-99	-99	0.8	1.9	1.2	1.6	-99	-99	2.7	-99	1.4	0.8	-99	0.8	3.3	1.3	1.9	1.2	-99	1.5	2.7	1.7	2.7
2014-02-02	9	0.8	1.2	1.6	-99	-99	0.5	1.8	1.5	1.9	-99	-99	2.4	-99	2	0.6	-99	0.7	2.3	1.8	1.4	1.5	-99	1.8	2	2	2.8
2014-02-02	10	0.7	1.3	1.8	-99	-99	0.4	1.8	1.5	1.8	-99	-99	2.5	-99	1.5	0.8	-99	0.8	1.4	1.7	1	1.5	-99	1.5	1.8	2.1	2.1
2014-02-02	11	0.3	1	1.8	-99	-99	0.6	1.5	1.4	1.6	-99	-99	1.5	-99	1.5	0.7	-99	0.6	0.6	1.3	0.6	1.1	-99	1	1.5	1.4	1.3
2014-02-02	12	0.2	0.6	1.2	-99	-99	0.6	1.1	1.5	0.9	-99	-99	1	-99	0.8	0.5	-99	0.7	0.6	0.9	0.6	0.7	-99	0.8	1	0.9	1.2
2014-02-02	13	0.2	0.5	0.9	-99	-99	0.7	0.9	0.8	0.6	-99	-99	0.8	-99	0.4	0.4	-99	0.7	0.5	0.7	0.5	0.7	-99	0.8	0.8	0.5	1
2014-02-02	14	0.2	0.5	0.7	-99	-99	0.7	0.7	0.8	0.6	-99	-99	0.6	-99	0.3	0.4	-99	0.7	0.5	0.6	0.5	0.6	-99	0.7	0.9	0.6	0.9
2014-02-02	15	0.2	0.4	0.7	-99	-99	0.8	0.7	0.8	0.6	-99	-99	0.6	-99	0.4	0.4	-99	0.7	0.4	0.6	0.5	0.9	-99	0.7	1	0.6	1
2014-02-02	16	0.1	0.4	0.7	-99	-99	0.7	0.7	0.8	0.6	-99	-99	0.6	-99	0.4	0.4	-99	0.7	0.4	0.7	0.6	0.7	-99	0.7	1	0.5	0.7
2014-02-02	17	0.2	0.5	0.8	-99	-99	0.7	0.7	0.7	0.6	-99	-99	0.7	-99	0.4	0.4	-99	0.7	0.5	0.6	0.6	0.6	-99	0.7	1	0.4	0.6
2014-02-02	18	0.3	0.4	0.9	-99	-99	0.7	0.6	0.9	1.1	-99	-99	0.8	-99	0.5	0.6	-99	0.6	0.6	0.7	0.7	0.6	-99	0.8	1.1	0.5	0.6
2014-02-02	19	0.4	0.5	1	-99	-99	0.8	0.8	0.9	1.7	-99	-99	0.9	-99	0.7	0.8	-99	0.7	1	1.5	0.5	0.7	-99	0.9	0.9	0.8	0.9
2014-02-02	20	0.2	0.7	1.1	-99	-99	0.9	0.8	1.4	1.4	-99	-99	1.3	-99	0.6	0.9	-99	1.3	1.1	1	0.8	0.8	-99	0.9	1.1	1	0.9
2014-02-02	21	0.1	0.9	1.4	-99	-99	1	1.3	1.4	1.3	-99	-99	1.2	-99	0.5	1	-99	1	0.9	1.3	0.9	0.9	-99	1.1	1.1	0.9	0.9
2014-02-02	22	0.2	1.2	1.3	-99	-99	1.1	2	1.1	1.5	-99	-99	1	-99	-99	1.2	-99	1.1	0.8	1.4	1.3	1.2	-99	1.2	1.3	0.9	1
2014-02-02	23	0.3	0.8	1.4	-99	-99	1.4	2.1	1.1	1.9	-99	-99	1.2	-99	1.8	1.2	-99	1.1	1.2	2.3	1.4	1.3	-99	2.1	1.5	1.3	1
2014-02-02	24	0.2	0.6	1.9	-99	-99	0.8	1.4	1.6	2.5	-99	-99	2.1	-99	1.2	0.5	-99	0.8	1.7	1.4	1.2	-99	-99	2.6	2.2	0.9	1
2014-02-03	1	0.1	0.4	1.5	-99	-99	0.6	1.4	1.2	2.5	-99	-99	1.6	-99	0.8	0.3	-99	0.6	1.8	1.8	1.1	-99	-99	1.6	1.9	0.8	2
2014-02-03	2	0.1	0.4	0.8	-99	-99	0.4	0.7	0.7	0.7	-99	-99	1	-99	0.8	0.3	-99	0.5	1.4	2.1	0.8	-99	-99	1.3	1.5	1.1	1.9
2014-02-03	3	0.2	0.3	0.7	-99	-99	0.4	0.4	0.5	0.5	-99	-99	0.5	-99	1.3	0.3	-99	0.4	0.7	1.3	0.8	-99	-99	1.3	0.9	0.8	1.2
2014-02-03	4	0.2	0.2	0.6	-99	-99	0.4	0.4	0.5	0.3	-99	-99	0.4	-99	0.7	0.2	-99	0.4	1	1.3	0.6	-99	-99	1.2	0.9	0.5	1.2
2014-02-03	5	0.3	0.3	0.5	-99	-99	0.4	0.3	0.5	0.6	-99	-99	0.5	-99	0.4	0.2	-99	0.3	0.8	0.5	0.5	-99	-99	1	0.8	0.5	1
2014-02-03	6	0.2	0.3	0.6	-99	-99	0.4	0.4	0.5	0.6	-99	-99	0.8	-99	0.2	0.3	-99	0.4	0.8	0.9	0.4	0.3	-99	1	0.9	0.5	1.7
2014-02-03	7	0.2	0.3	0.7	-99	-99	0.8	0.8	0.6	1.2	-99	-99	1.5	-99	0.3	0.5	-99	0.5	0.8	1	0.8	0.5	-99	1.2	0.8	0.6	1.6
2014-02-03	8	0.3	0.8	0.9	-99	-99	0.8	1.2	0.8	1.2	-99	-99	1.5	-99	0.4	0.6	-99	0.6	1.1	1.4	0.5	1.2	-99	1.5	0.8	0.6	1.6
2014-02-03	9	0.4	1	1	-99	-99	0.6	1.4	1.5	0.9	-99	-99	1.2	-99	0.6	0.7	-99	0.6	1	1.3	0.9	1.2	-99	1.3	0.7	0.6	1.6
2014-02-03	10	0.3	0.7	0.9	-99	-99	0.6	0.9	1.3	0.8	-99	-99	1.2	-99	0.6	0.7	-99	0.7	1	1.3	0.8	1.1	-99	0.9	0.7	0.7	1.6
2014-02-03	11	0.3	0.9	0.9	-99	-99	0.9	1	1.3	0.8	-99	-99	1.2	-99	0.5	0.7	-99	0.9	0.6	1.1	0.7	1.3	-99	1	0.7	0.6	1.5
2014-02-03	12	0.2	1.1	1.2	-99	-99	1	0.9	1.2	0.8	-99	-99	0.9	-99	0.6	0.7	-99	1	0.7	1	0.6	0.9	-99	0.9	0.8	0.8	1
2014-02-03	13	0.2	0.9	1.1	-99	-99	0.8	1	1.1	0.8	-99	-99	0.8	-99	0.6	0.6	-99	0.8	0.4	1	0.3	0.8	-99	0.9	0.8	0.8	0.7
2014-02-03	14	0.1	0.7	0.9	-99	-99	0.7	0.9	0.9	0.5	-99	-99	0.7	-99	0.2	0.5	-99	0.7	0.4	0.6	0.2	0.7	-99	0.7	0.6	0.9	0.4
2014-02-03	15	0.1	0.6	0.7	-99	-99	0.7	0.7	0.7	0.4	-99	-99	0.5	-99	0.1	0.3	-99	0.6	0.3	0.5	0.2	0.5	-99	0.5	0.6	0.6	0.4
2014-02-03	16	0.1	0.6	0.7	-99	-99	0.5	0.6	0.6	0.3	-99	-99	0.4	-99	0.1	0.1	-99	0.4	0.3	0.3	0.2	0.5	-99	0.4	0.6	0.7	0.5
2014-02-03	17	0.1	0.6	0.6	-99	-99	0.4	0.6	0.6	0.3	-99	-99	0.4	-99	-99	0.1	-99	0.4	0.3	0.3	0.2	0.5	-99	0.4	0.7	0.7	0.5
2014-02-03	18	0.1	0.6	0.6	-99	-99	0.4	0.6	0.6	0.3	-99	-99	0.4	-99	0.2	0.1	-99	0.4	0.3	0.3	0.2	0.4	-99	0.5	0.6	0.6	0.4
2014-02-03	19	0.1	0.5	0.8	-99	-99	0.5	0.6	0.7	0.5	-99	-99	0.5	-99	0.4	0.2	-99	0.5	0.5	0.4	0.2	0.5	-99	0.6	0.4	0.7	0.7
2014-02-03	20	0.2	0.7	0.7	-99	-99	0.4	0.6	1	0.7	-99	-99	0.7	-99	0.6	0.3	-99	0.4	0.6	0.5	0.3	0.4	-99	0.6	0.5	1.1	0.8
2014-02-03	21	0.2	0.9	0.7	-99	-99	0.4	0.9	1	0.7	-99	-99	0.7	-99	0.6	0.9	-99	0.4	0.5	0.8	0.3	1.2	-99	0.5	0.5	0.7	0.8
2014-02-03	22	0.3	0.9	1.1	-99	-99	0.5	1.4	0.9	1.3	-99	-99	0.9	-99	0.6	0.9	-99	0.4	1	1.9	0.4	1.2	-99	0.6	0.6	0.8	1.2
2014-02-03	23	0.2	0.8	1.8	-99	-99	0.4	2	0.9	1	-99	-99	1.3	-99	0.9	0.4	-99	0.5	1.5	2.2	0.7	1.1	-99	0.7	0.7	0.7	1.2
2014-02-03	24	0.3	0.9	2	-99	-99	-99	1.4	1.1	0.7	-99	-99	-99	-99	0.6	0.3	-99	0.5	1.4	1.6	0.5	1.2	-99	0.8	0.8	1.4	1.3
2014-02-04	1	0.2	0.8	0.7	-99	-99	-99	0.9	0.9	0.6	-99	-99	-99	-99	-99	0.3	-99	0.4	1	0.7	0.4	1.3	-99	0.7	0.5	1.7	1.5
2014-02-04	2	0.3	0.9	1.2	-99	-99	-99	0.6	0.8	0.5	-99	-99	-99	-99	-99	0.2	-99	0.3	0.8	0.7	0.4	0.7	-99	0.7	0.5	1.5	1.5
2014-02-04	3	0.3	0.8	1.3	-99	-99	-99	0.6	0.8	0.4	-99	-99	-99	-99	-99	0.1	-99	0.3	1	0.4	0.3	0.5	-99	0.6	0.4	1	1.1
2014-02-04	4	0.3	0.6	1.4	-99	-99	-99	0.5	0.7	0.4	-99	-99	-99	-99	-99	0.1	-99	0.3	0.8	0.4	0.2	0.6	-99	0.6	0.3	0.7	1.1
2014-02-04	5	0.3	0.6	1.5	-99	-99	-99	0.6	0.7	0.3	-99	-99	-99	-99	-99	0.2	-99	0.3	0.9	0.6	0.3	0.6	-99	0.6	0.4	0.8	1
2014-02-04	6	0.3	0.9	1.8	-99	-99	0.3	0.8	0.9	0.8	-99	-99	1.1	-99	-99	0.2	-99	0.5	1.7	0.8	0.5	0.9	-99	0.7	0.7	1.4	2.5
2014-02-04	7	0.6	1.7	2.6	-99	-99	0.5	2.1	1.3	1.7	-99	-99	2.1	-99	-99	0.4	-99	0.8	3.8	1.4	0.8	1.5	-99	1	1.6	2.4	3.5
2014-02-04	8	0.9	2.5	5.2	-99	-99	1	4.3	2	2.7	-99	-99	3.6	-99	-99	0.8	-99	0.9	4.1	3	1.2	2.7	-99	1.7	3	3.4	5.4
2014-02-04	9	0.9	2.6	3.4	-99	-99	0.5	3.2	2.5	1.9	-99	-99	3	-99	-99	1.2	-99	0.7	3.8	2.9	2.8	3.2	-99	1.8	1.9	2.3	4.4
2014-02-04	10	0.5	1.2	2.4	-99	-99	0.4	1.8	2.7	2.3	-99	-99	2	-99	-99	0.6	-99	0.6	2.3	2.6	0.8	3	-99	1.5	1.9	1.5	2.8
2014-02-04	11	0.4	1.6	1.8	-99	-99	0.4	1.4	2	1.4	-99	-99	1.8	-99	-99	0.8	-99	0.7	1.9	1	0.4	1.8	-99	0.9	1.1	1.2	1.9
2014-02-04	12	0.4	1	1.7	-99	-99	0.3	1.3	1.2	-99	-99	-99	0.8	-99	-99	0.3	-99	0.8	0.9	0.6	0.3	1.1	-99	0.6	0.7	1.4	1.8
2014-02-04	13	0.4	0.8	1.2	-99	-99	0.3	-99	1	-99	-99	-99	0.7	-99	-99	0.2	-99	0.5	0.6	0.4	0.3	1	-99	0.4	0.6	1.4	1.1
2014-02-04	14	0.3	0.8	1	-99	-99	0.3	-99	0.8	-99	-99	-99	0.6	-99	-99	0.3	-99	0.3	0.5	0.4	0.1	0.7	-99	0.5	0.6	1.4	0.8
2014-02-04	15	0.3	0.8	0.9	-99	-99	0.5	-99	0.7	-99	-99	-99	0.5	-99	-99	0.3	-99	0.4	0.4	0.4	0.2	0.8	-99	0.5	0.8	1.1	0.8
2014-02-04	16	0.4	0.7	0.9	-99	-99	0.5	-99	0.6	0.3	-99	-99	0.7	-99	-99	0.2	-99	0.5	0.4	0.4	0.2	1	-99	0.5	0.8	0.8	0.7
2014-02-04	17	0.5	0.6	0.9	-99	-99	0.4	-99	0.7	0.5	-99	-99	0.5	-99	-99	0.2	-99	0.5	0.4	0.4	0.2	1	-99	0.5	0.8	0.6	1.2
2014-02-04	18	0.5	0.6	0.9	-99	-99	0.4	1.1	0.8	0.5	-99	-99	0.6	-99	-99	0.2	-99	0.5	0.5	0.5	0.3	0.8	-99	0.6	0.7	0.4	1
2014-02-04	19	0.3	1	1.1	-99	-99	0.6	1.2	1	0.9	-99	-99	0.8	-99	-99	0.4	-99	0.7	0.7	0.7	0.3	1.2	-99	0.8	0.6	1	0.9
2014-02-04	20	0.5	1.5	1.2	-99	-99	0.6	1.2	1.3	1.3	-99	-99	1	-99	-99	0.6	-99	0.9	1	1.2	0.5	1.6	-99	0.9	0.8	1.2	2
2014-02-04	21	0.5	0.7	2.1	-99	-99	0.6	1.8	1.8	1.3	-99	-99	1.4	-99	-99	0.8	-99	0.8	1.3	1.5	1.4	1.8	-99	1	1.4	1.5	1.7
2014-02-04	22	0.7	0.6	2.1	-99	-99	0.7	0.9	2	1.3	-99	-99	1.4	-99	-99	0.9	-99	0.7	1.2	1.1	1.2	1.3	-99	1.1	1.1	1.5	1.2
2014-02-04	23	0.8	0.5	1.7	-99	-99	0.5	1	1.4	1.2	-99	-99	1	-99	-99	0.8	-99	0.7	1.2	0.9	1.1	1.2	-99	1	1.4	1	0.9
2014-02-04	24	1	0.4	1.4	-99	-99	0.8	0.9	1.2	0.9	-99	-99	1.5	-99	-99	-99	-99	0.6	1.3	0.9	1.4	0.8	-99	1	0.7	0.8	1.1
2014-02-05	1	0.6	0.4	1.2	-99	-99	0.9	0.7	-99	0.8	-99	-99	1.5	-99	0.6	-99	-99	0.4	1.5	1	0.8	0.5	-99	1.1	0.8	0.8	1.5
2014-02-05	2	0.5	0.3	1	-99	-99	0.5	0.5	-99	1.1	-99	-99	0.8	-99	0.7	-99	-99	0.4	1.3	1.2	0.6	0.5	-99	1.1	0.7	0.7	0.8
2014-02-05	3	0.5	0.3	0.9	-99	-99	0.3	0.4	-99	0.7	-99	-99	0.6	-99	1	-99	-99	0.4	0.9	0.8	0.7	0.4	-99	0.9	0.7	0.6	0.9
2014-02-05	4	0.5	0.3	0.6	-99	-99	0.3	0.4	-99	0.7	-99	-99	0.6	-99	0.7	-99	-99	0.4	0.8	0.8	0.6	0.5	-99	0.9	0.5	0.8	1.1
2014-02-05	5	0.5	0.4	0.8	-99	-99	0.4	0.4	-99	0.5	-99	-99	1	-99	0.8	-99	-99	0.4	1	0.8	0.5	0.4	-99	0.8	0.6	0.9	1.4
2014-02-05	6	0.4	0.7	1	-99	-99	0.5	0.6	1	0.7	-99	-99	1	-99	1.2	0.2	-99	0.5	1	0.8	1	0.6	-99	0.8	0.8	1	2.9
2014-02-05	7	0.7	1.9	2	-99	-99	1.4	2.2	1.4	1.5	-99	-99	1.8	-99	1.6	0.5	-99	0.8	3.2	1.3	0.9	1.5	-99	1.1	1.7	1.7	4.9
2014-02-05	8	1	2.7	3	-99	-99	3.2	4.3	2.4	2.3	-99	-99	3.7	-99	2.6	1.3	-99	1.3	4.2	1.9	1.9	2.5	-99	1.3	3.7	2.9	4.4
2014-02-05	9	1.1	3.1	2.8	-99	-99	1.3	3.2	2.5	2.4	-99	-99	3.9	-99	-99	1.8	-99	0.9	4.4	2	1.7	3	-99	1.5	5.3	2.7	4.1
2014-02-05	10	0.5	1.9	1.6	-99	-99	1.1	2.2	3.4	2.1	-99	-99	3.7	-99	-99	1	-99	0.7	2	1.2	1	1.7	-99	1.2	3.5	2.3	3.8
2014-02-05	11	0.4	1.1	1.1	-99	-99	0.9	1.3	2.9	1.7	-99	-99	1.8	-99	1.5	0.8	-99	1.2	0.8	1.3	1.5	2	-99	1.3	1.8	1	2.2
2014-02-05	12	0.2	0.6	1	-99	-99	1	0.9	1.6	0.8	-99	-99	0.8	-99	1.2	0.6	-99	1.1	0.6	0.9	-99	1.1	-99	1	1	0.8	1.1
2014-02-05	13	0.3	0.7	1.1	-99	-99	0.8	0.8	0.9	0.6	-99	-99	0.6	-99	0.7	0.4	-99	0.8	0.4	0.8	-99	0.7	-99	0.8	0.7	1.1	0.7
2014-02-05	14	0.2	0.7	0.9	-99	-99	0.8	1	0.9	0.6	-99	-99	0.7	-99	0.3	0.4	-99	0.8	0.4	0.5	-99	0.8	-99	0.6	0.8	1	0.6
2014-02-05	15	0.2	0.6	0.9	-99	-99	0.7	1	0.9	0.7	-99	-99	0.9	-99	0.3	0.3	-99	0.8	0.5	0.5	-99	0.8	-99	0.6	0.6	0.8	0.6
2014-02-05	16	0.2	0.7	1.1	-99	-99	0.7	1	1	0.7	-99	-99	0.8	-99	0.2	0.3	-99	0.7	0.5	0.4	0.2	0.8	-99	0.6	0.6	0.7	0.9
2014-02-05	17	0.2	0.8	1	-99	-99	0.7	1	0.8	0.6	-99	-99	0.6	-99	0.2	0.3	-99	0.7	0.5	0.4	0.2	0.9	-99	0.5	0.4	0.7	0.9
2014-02-05	18	0.2	0.8	0.9	-99	-99	0.6	1.3	0.9	0.6	-99	-99	0.6	-99	0.2	0.3	-99	0.7	0.5	0.4	0.2	0.9	-99	0.6	0.4	0.7	0.7
2014-02-05	19	0.2	0.9	0.8	-99	-99	0.6	1	1	0.6	-99	-99	0.7	-99	0.4	0.3	-99	0.5	0.7	0.6	0.2	0.8	-99	0.6	0.5	0.8	1
2014-02-05	20	0.2	0.6	0.8	-99	-99	0.6	0.6	1.1	0.8	-99	-99	1.1	-99	0.6	0.4	-99	0.6	0.8	0.9	0.3	0.8	-99	0.6	0.6	0.7	1.4
2014-02-05	21	0.4	0.6	0.9	-99	-99	0.5	0.4	0.9	0.8	-99	-99	1	-99	0.7	0.4	-99	0.6	0.8	0.9	0.4	0.6	-99	0.7	0.6	0.6	2.3
2014-02-05	22	0.2	0.7	0.9	-99	-99	0.5	0.4	0.8	0.5	-99	-99	0.7	-99	0.9	0.4	-99	0.5	0.8	0.7	0.7	0.9	-99	0.8	0.8	0.7	1.6
2014-02-05	23	0.3	0.5	1	-99	-99	0.5	0.6	0.8	0.5	-99	-99	0.8	-99	0.6	0.5	-99	0.7	0.5	0.8	1	0.8	-99	0.8	0.7	0.6	0.7
2014-02-05	24	-99	0.5	0.7	-99	-99	0.4	0.6	0.9	0.5	-99	-99	0.7	-99	0.6	0.6	-99	0.8	0.5	0.7	0.8	0.6	-99	0.8	0.7	0.5	-99
2014-02-06	1	-99	0.5	0.7	-99	-99	0.5	0.5	0.8	0.4	-99	-99	0.6	-99	0.2	0.6	-99	0.6	0.7	0.7	0.7	0.6	-99	0.9	0.5	0.5	-99
2014-02-06	2	-99	0.4	0.8	-99	-99	0.6	0.5	0.7	0.4	-99	-99	0.6	-99	0	0.5	-99	0.6	0.4	0.5	0.5	0.5	-99	0.9	0.3	0.4	-99
2014-02-06	3	-99	0.4	0.6	-99	-99	0.6	0.4	0.7	0.3	-99	-99	0.5	-99	0	0.3	-99	0.5	0.3	0.6	0.4	0.5	-99	0.7	0.2	0.4	-99
2014-02-06	4	-99	0.5	0.6	-99	-99	0.6	0.4	0.7	0.2	-99	-99	0.4	-99	0	0.4	-99	0.5	0.3	0.4	0.4	0.6	-99	0.6	0.2	0.4	-99
2014-02-06	5	-99	0.5	0.7	-99	-99	0.5	0.4	0.7	0.3	-99	-99	0.4	-99	0	0.3	-99	0.5	0.6	0.4	0.4	0.6	-99	0.6	0.3	0.5	-99
2014-02-06	6	0.2	0.6	0.9	-99	-99	0.7	0.6	0.9	0.5	-99	-99	1	-99	0.1	0.4	-99	0.5	0.8	0.5	0.5	0.6	-99	0.7	0.5	0.5	1.1
2014-02-06	7	0.4	1.6	1.1	-99	-99	1.2	2	1.4	0.9	-99	-99	1	-99	0.5	0.6	-99	0.8	1.1	0.8	0.5	1.1	-99	1.2	1	0.6	1.4
2014-02-06	8	0.5	2.8	2	-99	-99	1.2	4.1	2	1.7	-99	-99	1.6	-99	1.6	1	-99	1.1	1.9	1.5	1	1.9	-99	1.8	1.5	0.8	2.7
2014-02-06	9	0.6	2.1	2.3	-99	-99	1.6	2.7	2.4	1.8	-99	-99	2	-99	1.5	1.2	-99	1	2.6	2	2.1	2.4	-99	1.3	2.2	0.9	3.1
2014-02-06	10	0.5	1.4	1.9	-99	-99	1.4	1.7	2.6	1.4	-99	-99	2.9	-99	1.1	1.1	-99	1.1	2	2	0.8	2	-99	1.5	1.9	1.3	2.4
2014-02-06	11	0.3	1.2	1.9	-99	-99	0.9	1.9	2.6	1.3	-99	-99	2.1	-99	1.1	0.9	-99	1.1	0.9	1.8	0.8	1.3	-99	1.6	1.3	1.3	1.5
2014-02-06	12	0.2	1.1	1.5	-99	-99	1	1.7	1.5	1	-99	-99	0.9	-99	1	0.7	-99	1.2	0.5	1.6	0.8	1.5	-99	1.6	1.2	1.2	0.9
2014-02-06	13	0.2	1.3	0.8	-99	-99	0.9	1	1.1	0.9	-99	-99	1	-99	0.7	0.8	-99	1	0.4	1.1	0.3	0.8	-99	1	1.1	0.9	0.6
2014-02-06	14	0.1	1.3	0.8	-99	-99	1	0.8	1	0.8	-99	-99	0.6	-99	0.4	0.7	-99	1	0.4	0.9	0.2	1.2	-99	0.8	0.7	0.8	0.5
2014-02-06	15	0.1	0.9	0.9	-99	-99	0.9	1.1	0.8	0.5	-99	-99	0.6	-99	0.1	0.7	-99	0.9	0.3	0.9	0.3	1.1	-99	0.7	0.6	0.5	0.5
2014-02-06	16	0.1	0.7	0.9	-99	-99	0.9	0.9	0.9	0.4	-99	-99	0.7	-99	0	0.6	-99	0.9	0.3	0.7	0.3	0.7	-99	0.7	0.5	0.5	0.6
2014-02-06	17	0.2	0.5	0.9	-99	-99	0.9	0.8	0.9	0.4	-99	-99	0.5	-99	0.1	0.6	-99	1	0.2	0.7	0.3	0.8	-99	0.6	0.5	0.4	0.6
2014-02-06	18	0.1	0.5	1	-99	-99	1.1	0.7	0.9	0.6	-99	-99	0.6	-99	0.3	0.8	-99	1	0.4	0.6	0.3	0.9	-99	0.7	0.5	0.5	0.6
2014-02-06	19	0.2	0.6	1	-99	-99	1.2	0.8	1	1	-99	-99	0.7	-99	0.4	0.6	-99	1.4	0.7	0.7	0.3	1.1	-99	0.7	0.5	0.8	0.7
2014-02-06	20	0.2	0.6	1	-99	-99	0.7	0.7	1.2	0.9	-99	-99	0.9	-99	0.4	0.7	-99	0.8	0.5	0.9	0.3	0.7	-99	0.7	0.6	0.7	0.7
2014-02-06	21	0.2	0.7	1.1	-99	-99	0.8	0.8	0.9	0.7	-99	-99	0.8	-99	0.6	0.5	-99	0.8	0.5	1.3	0.3	1.1	-99	0.8	0.7	0.7	0.8
2014-02-06	22	0.2	0.7	1	-99	-99	0.8	0.7	1	0.6	-99	-99	0.7	-99	0.7	0.5	-99	0.8	0.5	0.9	0.3	0.7	-99	1.1	1.1	0.7	0.9
2014-02-06	23	0.1	0.6	1	-99	-99	0.8	0.5	1.1	0.7	-99	-99	0.9	-99	0.8	0.7	-99	0.8	0.6	0.9	0.5	0.8	-99	1	0.9	0.6	0.8
2014-02-06	24	0.2	0.6	0.9	-99	-99	0.7	0.4	0.9	0.6	-99	-99	0.8	-99	0.6	0.5	-99	0.7	0.7	0.9	0.6	0.7	-99	-99	1	0.7	1
2014-02-07	1	0.1	0.5	0.8	-99	-99	0.4	0.3	0.8	0.5	-99	-99	0.7	-99	0.6	0.5	-99	0.6	0.6	0.7	0.8	0.5	-99	-99	0.8	0.6	1.1
2014-02-07	2	0.1	0.6	0.7	-99	-99	0.4	0.3	0.7	0.3	-99	-99	0.6	-99	0.7	0.5	-99	0.5	0.5	0.5	0.5	0.5	-99	-99	0.6	0.5	0.8
2014-02-07	3	0.2	0.5	0.7	-99	-99	0.4	0.3	0.7	0.3	-99	-99	0.5	-99	0.4	0.3	-99	0.4	0.4	0.4	0.4	0.5	-99	-99	0.4	0.5	0.7
2014-02-07	4	0.2	0.6	0.7	-99	-99	0.4	0.3	0.7	0.5	-99	-99	0.5	-99	0.4	0.3	-99	0.5	0.5	0.6	0.4	0.5	-99	-99	0.4	0.6	0.6
2014-02-07	5	0.2	0.5	1.2	-99	-99	0.4	0.4	0.9	0.6	-99	-99	0.8	-99	0.1	0.4	-99	0.5	0.6	0.6	0.3	0.6	-99	-99	0.4	0.6	1
2014-02-07	6	0.3	0.9	1.5	-99	-99	0.7	0.5	1.2	0.8	-99	-99	1.2	-99	0.3	0.5	-99	0.6	0.8	0.5	0.7	0.8	-99	0.3	0.6	0.9	2.8
2014-02-07	7	0.5	1.5	1.5	-99	-99	1	1.1	1.4	1.2	-99	-99	2.2	-99	1.8	0.7	-99	1.2	1.4	0.9	1.3	1.4	-99	0.6	1.6	1.5	4.2
2014-02-07	8	0.7	1.4	2.5	-99	-99	1.3	3.7	2	2.1	-99	-99	2.5	-99	2	1.2	-99	1.4	3.6	2.9	1.5	2.8	-99	2.5	1.9	1.9	4.8
2014-02-07	9	0.8	1.6	2.9	-99	-99	0.7	3.3	2	2.5	-99	-99	2.6	-99	1.1	1.1	-99	1	2.7	2.2	2.7	2.8	-99	2.9	2.3	1.7	3.6
2014-02-07	10	0.4	0.7	1.5	-99	-99	0.6	1.4	1.7	2.8	-99	-99	2.6	-99	1.1	0.8	-99	0.7	1.9	1.5	1.6	2.1	-99	1.7	2.2	1.1	2.1
2014-02-07	11	0.3	0.7	1.3	-99	-99	0.6	1.1	1.9	1.8	-99	-99	2.1	-99	1	0.9	-99	0.8	1.3	1.6	0.6	1.1	-99	0.8	1.4	1	1.4
2014-02-07	12	0.2	0.6	1.3	-99	-99	0.8	0.9	1.5	1.1	-99	-99	1.4	-99	0.4	0.8	-99	1	-99	1.1	0.6	0.7	-99	0.9	0.8	0.4	1.3
2014-02-07	13	0.2	0.6	1.5	-99	-99	1	0.6	-99	0.8	-99	-99	1	-99	0.3	0.9	-99	1.1	0.7	1	0.7	0.9	-99	0.6	0.5	0.5	0.9
2014-02-07	14	0.2	0.6	1.4	-99	-99	1.1	0.7	-99	0.7	-99	-99	1	-99	0.2	0.8	-99	1.2	0.7	0.8	0.6	0.9	-99	0.5	0.6	0.6	0.8
2014-02-07	15	0.2	0.7	1.2	-99	-99	1.2	1	1.2	0.6	-99	-99	0.9	-99	0.4	0.8	-99	1.3	0.6	0.8	0.4	1	-99	0.3	0.6	0.6	0.8
2014-02-07	16	0.2	0.7	1.2	-99	-99	1.2	1.5	1.2	0.7	-99	-99	0.8	-99	0.4	0.9	-99	-99	0.5	1	0.5	1.2	-99	0.4	0.8	0.7	0.9
2014-02-07	17	0.2	0.9	1.3	-99	-99	0.7	1.5	1.4	1	-99	-99	1.5	-99	0.6	0.5	-99	0.7	0.6	0.9	0.6	1.5	-99	0.6	1.2	0.7	0.7
2014-02-07	18	0.3	1.1	1.1	-99	-99	0.6	0.7	1.1	0.8	-99	-99	1.6	-99	0.8	0.5	-99	0.6	0.8	0.6	0.5	1.1	-99	0.5	1	0.7	1.2
2014-02-07	19	0.4	0	0.8	-99	-99	0.5	0.2	0.8	0.4	-99	-99	1.1	-99	0.8	0.3	-99	0.6	0.5	0.6	0.5	0.6	-99	0.3	0.9	0.6	0.8
2014-02-07	20	0.2	0.5	0.7	-99	-99	0.5	0.2	0.8	0.4	-99	-99	0.7	-99	0.5	0.4	-99	0.7	0.4	0.6	0.5	0.6	-99	0.2	0.6	0.5	0.3
2014-02-07	21	0.1	0.4	1.1	-99	-99	0.7	0.6	1	0.7	-99	-99	0.8	-99	0.5	0.6	-99	0.7	0.6	0.9	0.6	0.9	-99	0.4	0.7	0.7	0.5
2014-02-07	22	0.2	0.9	1	-99	-99	1	1.5	0.9	0.8	-99	-99	0.6	-99	0.3	0.6	-99	1	0.4	0.8	0.5	0.9	-99	0.3	0.5	0.6	0.7
2014-02-07	23	0.3	0.9	1	-99	-99	1.1	1.3	1.1	0.7	-99	-99	1.1	-99	0.5	0.7	-99	1	0.8	0.9	0.3	1.2	-99	0.6	0.6	0.8	0.8
2014-02-07	24	0.2	0.9	1.2	-99	-99	1.4	1	1.2	0.8	-99	-99	1.2	-99	0.8	0.6	-99	1.1	0.9	1.1	0.4	1	-99	0.7	1	1.2	0.9
2014-02-08	1	0.2	0.8	1.2	-99	-99	0.7	1	1.4	1.1	-99	-99	1.2	-99	1	0.3	-99	0.8	1.2	1.1	0.8	1	-99	0.8	1.2	0.9	0.9
2014-02-08	2	0.3	0.6	1.4	-99	-99	0.5	0.8	1.3	1.2	-99	-99	1.3	-99	0.7	0.3	-99	0.6	1	1.1	0.5	1.1	-99	0.7	1.4	1	0.9
2014-02-08	3	0.3	0.4	1.3	-99	-99	0.6	0.7	1.4	1	-99	-99	1	-99	0.5	0.5	-99	0.5	0.6	1	0.4	0.7	-99	0.4	1.1	1.1	1
2014-02-08	4	0.2	0.5	1	-99	-99	0.5	0.5	1.4	1.3	-99	-99	1.4	-99	0.9	0.3	-99	0.5	0.8	1.1	0.7	0.6	-99	0.4	0.8	1	1.3
2014-02-08	5	0.3	0.5	0.9	-99	-99	0.4	0.4	1.4	1.2	-99	-99	1.7	-99	0.8	0.2	-99	0.4	1	1	0.7	0.6	-99	0.3	0.8	1	1.1
2014-02-08	6	0.4	0.7	0.8	-99	-99	0.5	0.6	1.5	1	-99	-99	2.1	-99	0.9	0.2	-99	0.5	1.4	0.6	0.6	0.9	-99	0.4	0.7	1.2	2.1
2014-02-08	7	0.4	1.2	1.2	-99	-99	0.7	1	1.3	1.5	-99	-99	2.4	-99	1.7	0.4	-99	0.6	1.9	0.8	0.7	1.4	-99	0.5	1.2	1.3	2.7
2014-02-08	8	0.7	1.7	2	-99	-99	1.9	1.9	1.4	1.7	-99	-99	2.8	-99	2.1	1	-99	1	1.6	1	1	1.8	-99	0.7	1.7	1.8	3
2014-02-08	9	0.7	1.7	1.6	-99	-99	1.6	2.2	1.7	2.1	-99	-99	2.1	-99	2.2	1.5	-99	1.3	1.8	1.4	2.4	2.6	-99	0.9	2.7	1.5	3
2014-02-08	10	0.6	2.1	1.6	-99	-99	0.8	1.7	2	2.4	-99	-99	2.3	-99	1.4	0.8	-99	1.2	1.4	1.1	1	1.5	-99	0.6	2.1	1.8	2.5
2014-02-08	11	0.5	1.1	1.4	-99	-99	-99	0.9	2.1	1.7	-99	-99	2	-99	1.1	0.7	-99	-99	1.4	1.2	0.6	1.2	-99	1	1.7	1.3	1.9
2014-02-08	12	0.2	0.9	1	-99	-99	-99	0.6	1.4	1.1	-99	-99	1.3	-99	0.9	0.5	-99	0.6	0.9	0.9	0.6	1	-99	0.6	1.4	0.8	1.3
2014-02-08	13	0.1	0.5	1	-99	-99	-99	0.6	0.9	0.6	-99	-99	0.7	-99	0.5	0.4	-99	0.6	0.5	0.7	0.5	1.1	-99	0.5	0.8	0.5	0.7
2014-02-08	14	0.1	0.5	0.9	-99	-99	0.6	0.8	0.7	0.4	-99	-99	0.7	-99	0.3	0.4	-99	0.7	0.2	0.7	0.5	0.8	-99	0.4	0.6	0.5	0.5
2014-02-08	15	0	0.5	1	-99	-99	0.6	0.8	0.8	0.4	-99	-99	0.6	-99	0.2	0.3	-99	0.5	0.3	0.6	0.5	0.7	-99	0.3	0.7	0.5	0.6
2014-02-08	16	0.1	0.4	0.9	-99	-99	0.8	0.5	0.8	0.3	-99	-99	0.7	-99	0.3	0.3	-99	0.7	0.3	0.6	0.5	0.7	-99	0.2	0.7	0.5	0.5
2014-02-08	17	0.1	0.4	0.8	-99	-99	0.7	0.3	0.8	0.5	-99	-99	1	-99	0.4	0.3	-99	0.7	0.4	0.6	0.5	0.7	-99	0.2	0.8	0.4	0.5
2014-02-08	18	0.1	0.5	0.8	-99	-99	0.6	0.5	0.8	0.5	-99	-99	1.1	-99	0.5	0.4	-99	0.6	0.4	0.8	0.6	0.5	-99	0.3	0.9	0.5	0.4
2014-02-08	19	0.1	0.6	0.8	-99	-99	0.7	0.5	0.9	0.7	-99	-99	1	-99	0.4	0.5	-99	0.7	0.4	0.9	0.5	0.6	-99	0.3	0.6	0.6	0.5
2014-02-08	20	0.1	0.6	0.7	-99	-99	0.7	0.5	0.7	0.5	-99	-99	0.5	-99	0.4	0.4	-99	0.7	0.4	0.5	0.8	0.5	-99	0.2	0.5	0.6	0.6
2014-02-08	21	0.1	0.5	0.8	-99	-99	0.7	0.4	0.6	0.5	-99	-99	0.5	-99	0.6	0.3	-99	0.7	0.4	0.5	0.8	0.5	-99	0.2	0.5	0.6	0.5
2014-02-08	22	0.2	0.7	0.9	-99	-99	0.7	0.4	0.7	0.4	-99	-99	0.7	-99	0.6	0.4	-99	0.6	0.6	0.6	0.8	0.6	-99	0.3	0.6	0.7	0.5
2014-02-08	23	0.4	0.7	0.9	-99	-99	0.6	0.7	0.9	0.6	-99	-99	0.8	-99	0.7	0.5	-99	0.8	0.8	0.8	0.7	0.8	-99	0.4	0.6	0.7	0.6
2014-02-08	24	0.3	0.6	1	-99	-99	0.7	0.3	0.9	0.6	-99	-99	0.8	-99	1.2	0.4	-99	-99	0.9	0.9	0.7	0.8	-99	0.5	0.9	0.7	0.4
2014-02-09	1	0.2	0.5	1	-99	-99	0.9	0.5	0.8	0.5	-99	-99	0.8	-99	1.1	0.4	-99	-99	0.8	0.7	0.5	0.8	-99	0.5	0.8	0.9	0.3
2014-02-09	2	0.3	0.4	0.8	-99	-99	0.6	0.6	0.7	0.4	-99	-99	0.6	-99	0.9	0.2	-99	-99	0.7	0.5	0.4	0.6	-99	0.7	0.7	1.1	0.8
2014-02-09	3	0.3	0.3	0.9	-99	-99	0.5	0.5	0.7	0.5	-99	-99	0.6	-99	0.6	0.2	-99	-99	0.5	0.4	0.5	0.5	-99	0.4	0.6	1.1	1.4
2014-02-09	4	0.3	0.3	0.8	-99	-99	0.5	0.7	0.7	0.6	-99	-99	0.6	-99	0.3	0.2	-99	-99	1	1	0.5	0.6	-99	0.3	0.9	1.2	1.3
2014-02-09	5	0.3	0.4	0.7	-99	-99	0.4	0.5	1	1.1	-99	-99	0.8	-99	0.4	0.1	-99	-99	0.8	0.7	0.4	0.5	-99	0.5	0.9	1	1.6
2014-02-09	6	0.3	0.4	0.7	-99	-99	0.4	0.6	1.4	1.6	-99	-99	1	-99	0.7	0.1	-99	0.2	1	0.6	0.9	0.5	-99	0.5	1	0.8	1.5
2014-02-09	7	0.4	0.7	1	-99	-99	0.6	1	1.8	1.3	-99	-99	1.7	-99	0.7	0.2	-99	0.3	1.4	0.9	0.7	0.5	-99	0.6	1.1	1	1.6
2014-02-09	8	0.6	1.2	1.7	-99	-99	0.6	1.1	2.2	1.6	-99	-99	2.2	-99	1.1	0.3	-99	0.5	3.1	1.7	2.2	1.6	-99	0.9	1.5	1.7	3.1
2014-02-09	9	0.5	1.1	1.7	-99	-99	0.8	0.9	2.1	1.9	-99	-99	1.7	-99	1.2	0.4	-99	0.4	2.6	1.8	2.1	1.4	-99	0.8	1.8	1.4	2.8
2014-02-09	10	0.3	1.2	1.5	-99	-99	0.4	0.5	2	1.5	-99	-99	2.3	-99	0.9	0.6	-99	0.2	1.6	1.3	1	1	-99	1.1	1.3	1	2.4
2014-02-09	11	0.2	0.7	0.8	-99	-99	0.4	0.3	1.3	1	-99	-99	1.3	-99	1.1	0.4	-99	0.3	0.8	0.9	0.5	0.6	-99	1.1	1.1	0.8	1.6
2014-02-09	12	0.1	0.5	0.8	-99	-99	0.4	0.4	0.8	0.5	-99	-99	0.5	-99	0.4	0.3	-99	0.2	0.4	0.5	0.5	0.5	-99	0.3	0.6	0.5	0.6
2014-02-09	13	0.1	0.4	0.8	-99	-99	0.5	0.3	0.7	0.4	-99	-99	0.4	-99	0.3	0.3	-99	0.3	0.2	0.4	0.3	0.5	-99	0.1	0.4	0.4	0.3
2014-02-09	14	0.1	0.4	0.7	-99	-99	0.5	0.2	0.6	0.3	-99	-99	0.2	-99	0.2	0.3	-99	0.3	0.2	0.3	0.4	0.4	-99	0.1	-99	0.4	0.3
2014-02-09	15	0	0.4	0.6	-99	-99	0.4	0.2	0.5	0.3	-99	-99	0.3	-99	0.2	0.2	-99	0.2	0.1	0.3	0.3	0.4	-99	0	0.8	0.3	0.3
2014-02-09	16	0.1	0.3	0.6	-99	-99	0.4	0.2	0.5	0.2	-99	-99	0.3	-99	0.2	0.2	-99	0.2	0.1	0.4	0.3	0.5	-99	0	0.8	0.3	0.3
2014-02-09	17	0.1	0.3	0.6	-99	-99	0.4	0.1	0.5	0.3	-99	-99	0.4	-99	0.2	0.2	-99	0.2	0.1	0.3	0.3	0.5	-99	0.1	0.7	0.3	0.3
2014-02-09	18	0.1	0.3	0.6	-99	-99	0.4	0.2	0.5	0.2	-99	-99	0.5	-99	0.3	0.2	-99	0.2	0.2	0.3	0.3	0.4	-99	0.1	0.7	0.4	0.3
2014-02-09	19	0.1	0.4	0.9	-99	-99	0.7	0.5	0.6	0.4	-99	-99	0.7	-99	0.6	0.5	-99	0.5	0.4	0.6	0.6	0.6	-99	0.3	0.7	0.5	0.4
2014-02-09	20	0.2	0.6	1	-99	-99	0.9	0.6	0.8	0.7	-99	-99	0.8	-99	1	0.7	-99	0.9	0.5	1.3	1	0.7	-99	1.1	0.9	0.8	0.5
2014-02-09	21	0.2	0.6	0.9	-99	-99	0.8	0.5	0.7	0.6	-99	-99	0.6	-99	0.6	0.8	-99	0.7	0.5	1.4	0.9	-99	-99	0.9	0.6	0.8	0.7
2014-02-09	22	0.2	0.5	1.1	-99	-99	0.6	0.3	0.9	0.7	-99	-99	0.9	-99	0.7	0.5	-99	0.7	0.7	0.9	0.6	0.7	-99	1	0.9	0.8	0.6
2014-02-09	23	0.2	0.5	1	-99	-99	0.6	0.5	0.7	0.5	-99	-99	0.8	-99	0.9	0.5	-99	0.4	0.7	0.9	0.6	0.6	-99	0.9	0.8	1	1
2014-02-09	24	0.2	0.5	1.1	-99	-99	0.7	0.6	0.9	0.5	-99	-99	0.8	-99	-99	0.3	-99	0.3	0.6	1.2	0.5	-99	-99	0.9	0.7	1.3	1.3
2014-02-10	1	0.2	0.4	0.8	-99	-99	0.6	0.2	0.8	1	-99	-99	0.8	-99	-99	0.2	-99	0.2	0.7	1.2	0.6	-99	-99	0.5	1	1.3	1.4
2014-02-10	2	0.2	0.3	0.8	-99	-99	0.3	0.3	1.1	1	-99	-99	0.8	-99	-99	0.3	-99	0.2	0.6	0.8	0.4	-99	-99	0.4	0.9	1	0.9
2014-02-10	3	0.2	0.5	0.9	-99	-99	0.4	0.2	1.1	0.9	-99	-99	0.8	-99	-99	0.4	-99	0.3	0.4	0.7	0.4	-99	-99	0.4	0.8	0.9	1.1
2014-02-10	4	0.2	0.5	1	-99	-99	0.4	0.2	1.1	0.9	-99	-99	0.9	-99	-99	0.4	-99	0.2	0.6	0.7	0.4	-99	-99	0.4	0.8	0.7	1.3
2014-02-10	5	0.2	0.5	0.8	-99	-99	0.4	0.4	1.2	0.8	-99	-99	1.1	-99	-99	0.4	-99	0.2	0.6	0.6	0.4	-99	-99	0.3	0.7	0.8	0.8
2014-02-10	6	0.3	0.8	1.1	-99	-99	0.5	0.6	1.3	1.4	-99	-99	1.6	-99	-99	0.5	-99	0.3	1.4	0.6	0.9	0.9	-99	0.4	0.9	0.9	2.6
2014-02-10	7	0.5	2.2	2	-99	-99	0.8	1.7	2.2	2.2	-99	-99	1.7	-99	-99	0.5	-99	0.7	2.3	1.5	0.5	1.6	-99	0.6	1.6	1.8	2.4
2014-02-10	8	-99	3	2.9	-99	-99	0.9	3.9	2.6	3.2	-99	-99	2.7	-99	-99	1.2	-99	1.3	3.1	2.5	1.2	3.2	-99	1.4	3.4	2.1	4.4
2014-02-10	9	0.8	3.6	2.8	-99	-99	1.6	4.1	3.1	2.2	-99	-99	2.4	-99	-99	1.6	-99	0.9	2.7	2.6	1.3	3.2	-99	1	3.4	2	4.2
2014-02-10	10	0.7	2.1	2.6	-99	-99	1.2	3.1	2.5	2.4	-99	-99	1.6	-99	-99	1.3	-99	1.4	1.7	1.6	1.1	1.9	-99	0.5	3.1	1.8	2.7
2014-02-10	11	0.4	1.6	2.6	-99	-99	0.9	2.1	2	1.5	-99	-99	1.5	-99	-99	1.1	-99	1.1	1.3	1.3	1	1.7	-99	0.5	2.6	1.4	1.6
2014-02-10	12	0.3	1.1	1.7	-99	-99	0.6	1	1.4	0.9	-99	-99	1.3	-99	-99	0.8	-99	-99	-99	1	0.3	1.3	-99	0.5	1.3	1	1.1
2014-02-10	13	0.2	0.6	0.9	-99	-99	0.6	0.6	1.1	0.7	-99	-99	1	-99	-99	0.5	-99	-99	0.6	0.6	0.5	0.7	-99	0.3	0.6	0.5	0.8
2014-02-10	14	0.2	0.5	0.7	-99	-99	0.6	0.6	0.8	0.8	-99	-99	0.8	-99	-99	0.5	-99	0.4	0.4	0.8	0.4	0.7	-99	0.5	0.9	0.4	0.4
2014-02-10	15	0.2	0.4	0.7	-99	-99	0.6	0.5	0.7	0.5	-99	-99	0.6	-99	-99	0.4	-99	0.4	0.2	0.8	0.5	0.7	-99	0.6	0.9	0.4	0.4
2014-02-10	16	0.2	0.4	0.7	-99	-99	0.5	0.5	0.6	0.4	-99	-99	0.6	-99	-99	0.4	-99	0.3	0.2	0.7	0.5	0.5	-99	0.4	0.8	0.4	0.4
2014-02-10	17	0.2	0.4	0.7	-99	-99	0.5	0.5	0.6	0.4	-99	-99	0.4	-99	-99	0.3	-99	0.3	0.2	0.5	0.5	0.9	-99	0.2	0.8	0.4	0.4
2014-02-10	18	-99	0.5	0.8	-99	-99	0.5	0.4	0.6	0.4	-99	-99	0.6	-99	-99	0.3	-99	0.3	0.3	0.5	0.4	0.7	-99	0.2	0.8	0.4	0.5
2014-02-10	19	0.3	0.7	1.1	-99	-99	0.8	0.9	-99	0.7	-99	-99	1.1	-99	-99	0.7	-99	0.8	0.5	0.9	0.6	1	-99	0.5	1	0.7	0.4
2014-02-10	20	0.2	0.7	1.4	-99	-99	0.8	1	1.1	0.9	-99	-99	1	-99	-99	1	-99	1.2	0.6	1.7	0.9	1.1	-99	0.6	1	0.7	0.6
2014-02-10	21	0.2	0.7	0.8	-99	-99	0.8	0.9	0.7	0.6	-99	-99	0.5	-99	-99	0.5	-99	0.6	0.3	0.5	0.9	0.9	-99	0.5	0.6	0.8	0.5
2014-02-10	22	0.3	0.9	0.9	-99	-99	0.7	1.5	0.8	0.7	-99	-99	0.6	-99	-99	0.4	-99	0.4	0.5	0.8	0.8	1.2	-99	0.4	0.7	0.9	0.6
2014-02-10	23	0.3	0.7	1.3	-99	-99	1.1	1	1	0.9	-99	-99	1	-99	-99	0.5	-99	0.6	0.8	0.9	0.7	1.2	-99	0.6	0.7	1.4	0.4
2014-02-10	24	0.2	0.5	1.6	-99	-99	-99	0.6	1	0.8	-99	-99	-99	-99	0.5	0.3	-99	0.4	1	0.8	0.6	1.1	-99	1	0.8	1.5	0.5
2014-02-11	1	0.2	0.4	-99	-99	-99	-99	0.6	0.9	0.6	-99	-99	-99	-99	0.7	0.2	-99	0.3	1.1	0.5	0.6	0.8	-99	0.8	0.9	1.2	0.6
2014-02-11	2	0.2	0.3	-99	-99	-99	-99	0.3	0.8	1	-99	-99	-99	-99	0.2	0.3	-99	0.2	1.2	0.8	0.8	0.6	-99	0.5	1	1.3	0.9
2014-02-11	3	0.2	0.3	-99	-99	-99	-99	0.3	0.6	0.6	-99	-99	-99	-99	0.2	0.2	-99	0.2	0.9	0.4	0.6	0.5	-99	0.3	0.5	1.1	1
2014-02-11	4	0.3	0.3	-99	-99	-99	-99	0.2	0.7	0.4	-99	-99	-99	-99	0.2	0.1	-99	0.2	1.1	0.3	0.5	0.4	-99	0.3	0.3	1	1
2014-02-11	5	0.2	0.3	-99	-99	-99	-99	0.3	0.7	0.5	-99	-99	-99	-99	0.5	0.1	-99	0.2	0.6	0.4	0.5	0.3	-99	0.3	0.6	0.9	1.1
2014-02-11	6	0.3	0.8	-99	-99	-99	0.5	0.7	0.8	0.9	-99	-99	1.3	-99	1	0.2	-99	0.2	1.7	0.4	0.6	0.6	-99	0.4	0.9	1.3	2
2014-02-11	7	0.7	1.5	-99	-99	-99	1.1	1.7	1.2	1.7	-99	-99	2.4	-99	2	0.4	-99	0.6	3.5	1	0.7	2	-99	0.7	1.4	1.6	3.3
2014-02-11	8	1	2.9	-99	-99	-99	1.5	4.3	1.9	2.7	-99	-99	3.3	-99	2.9	1.1	-99	0.7	4.3	1.8	1.4	3.4	-99	1	3	3	3
2014-02-11	9	1	3.1	-99	-99	-99	0.7	3.4	2.2	2.8	-99	-99	3.4	-99	3.5	1.2	-99	0.9	4	1.4	1.4	2.2	-99	1.4	2.6	2.1	4.4
2014-02-11	10	0.8	2.2	-99	-99	-99	0.8	3.1	2.3	2.4	-99	-99	3.2	-99	2.9	0.9	-99	1	2.9	1.4	0.9	2.7	-99	0.9	2.1	1.4	2.5
2014-02-11	11	0.5	2.4	-99	-99	-99	0.8	2.2	1.8	1.4	-99	-99	2.1	-99	1.6	0.6	-99	0.7	1.2	0.9	0.4	2.4	-99	0.5	1.5	1.5	1.7
2014-02-11	12	0.3	1.4	-99	-99	-99	0.8	1.4	1.5	0.9	-99	-99	1.6	-99	0.2	0.4	-99	0.7	0.7	0.6	0.2	1.5	-99	0.2	0.6	1.6	1
2014-02-11	13	0.2	0.9	-99	-99	-99	0.5	1.1	1	0.4	-99	-99	0.6	-99	0.2	0.4	-99	0.6	0.4	0.3	0.2	0.8	-99	0.2	0.3	0.6	0.6
2014-02-11	14	0.3	0.8	-99	-99	-99	0.5	0.7	0.9	0.4	-99	-99	0.7	-99	0.2	0.3	-99	0.3	0.4	0.4	0.2	1.1	-99	0.2	0.4	0.8	0.7
2014-02-11	15	0.3	0.7	-99	-99	-99	0.5	0.7	0.8	0.4	-99	-99	0.8	-99	0.2	0.2	-99	0.4	0.5	0.3	0.2	1.1	-99	0.2	0.5	0.7	0.9
2014-02-11	16	0.5	0.6	-99	-99	-99	0.5	0.7	1	0.5	-99	-99	0.8	-99	0.1	0.2	-99	0.4	0.5	0.4	0.2	1.1	-99	0.2	0.4	0.7	0.9
2014-02-11	17	0.5	0.7	-99	-99	-99	0.5	0.5	0.9	0.5	-99	-99	0.8	-99	0.2	0.2	-99	0.4	0.6	0.5	0.2	0.7	-99	0.2	0.5	0.6	0.9
2014-02-11	18	0.3	0.4	-99	-99	-99	0.5	0.5	0.9	0.6	-99	-99	0.9	-99	0.3	0.2	-99	0.3	0.7	0.5	0.3	0.6	-99	0.2	0.3	0.6	0.7
2014-02-11	19	-99	0.5	-99	-99	-99	0.6	0.9	1.2	1	-99	-99	1.1	-99	0.4	0.4	-99	0.4	0.9	0.6	0.3	0.9	-99	0.4	0.7	0.6	0.7
2014-02-11	20	0.3	0.7	-99	-99	-99	0.6	1	1.4	1.1	-99	-99	1	-99	0.6	0.7	-99	0.4	-99	1.2	0.5	1.4	-99	0.8	0.9	1	0.8
2014-02-11	21	0.3	0.5	-99	-99	-99	0.6	0.6	0.9	0.7	-99	-99	1.1	-99	0.8	0.3	-99	0.4	0.7	0.8	0.6	0.8	-99	0.5	0.9	1.2	0.8
2014-02-11	22	0.6	0.6	-99	-99	-99	0.6	0.7	1.1	0.7	-99	-99	1.1	-99	1.2	0.3	-99	0.4	0.9	0.7	0.7	0.8	-99	0.6	0.7	1.2	0.9
2014-02-11	23	0.4	0.8	-99	-99	-99	0.5	1.4	1.4	1.2	-99	-99	1.5	-99	0.6	0.4	-99	0.4	1.3	1.1	0.6	1.1	-99	0.9	0.7	1.3	1
2014-02-11	24	0.5	1	-99	-99	-99	0.4	1.1	-99	0.9	-99	-99	1.2	-99	0.4	-99	-99	0.3	1	1	0.5	1.4	-99	0.6	0.4	1.2	1
2014-02-12	1	0.3	0.8	-99	-99	-99	0.3	0.9	-99	0.6	-99	-99	1.2	-99	0.4	-99	-99	0.3	1.1	0.8	0.8	1.5	-99	0.6	0.4	1.2	1.1
2014-02-12	2	0.5	1	-99	-99	-99	0.3	0.6	-99	0.5	-99	-99	1.2	-99	0.7	-99	-99	0.3	1.2	1	0.3	1.6	-99	0.8	0.3	1.3	0.8
2014-02-12	3	0.4	1.1	-99	-99	-99	0.3	0.6	-99	1	-99	-99	1.2	-99	0.7	-99	-99	0.2	1.2	0.6	0.4	1.3	-99	0.6	0.7	1.3	0.9
2014-02-12	4	0.4	0.9	-99	-99	-99	0.3	0.5	-99	0.6	-99	-99	1.2	-99	0.6	-99	-99	0.2	1	0.7	0.3	0.7	-99	0.6	0.6	1	0.8
2014-02-12	5	0.3	0.9	-99	-99	-99	0.3	0.6	-99	0.6	-99	-99	1	-99	0.8	-99	-99	0.2	0.8	0.5	0.4	0.9	-99	0.4	0.5	1.1	0.8
2014-02-12	6	0.4	0.7	-99	-99	-99	0.3	1	0.5	0.9	-99	-99	1.5	-99	0.8	0.4	-99	0.2	1.7	0.7	1	1.2	-99	0.5	0.7	1.4	1.5
2014-02-12	7	0.5	1.6	-99	-99	-99	0.5	1.9	1	1.6	-99	-99	2.4	-99	1.7	0.7	-99	0.3	2.6	1.8	0.7	2.3	-99	1	1.5	2.4	2.1
2014-02-12	8	1.1	2.8	-99	-99	-99	0.5	4.1	2.3	2.3	-99	-99	3.8	-99	4.2	1.8	-99	0.4	3.6	3.1	1.6	3.3	-99	1.6	2.9	3.3	3.4
2014-02-12	9	0.8	2.7	-99	-99	-99	0.5	3.1	2.6	3.1	-99	-99	3	-99	2.5	1.3	-99	0.5	2.6	1.9	1.7	3.4	-99	1.3	3.5	2.1	3.6
2014-02-12	10	0.4	2.3	-99	-99	-99	0.5	2.1	3	2.4	-99	-99	2	-99	1	1.3	-99	1.8	1.7	2.1	1	2.5	-99	1.8	3	1.7	2.5
2014-02-12	11	0.3	1.4	-99	-99	-99	1.2	1.5	1.4	1.1	-99	-99	1.3	-99	0.5	1.4	-99	-99	0.7	2.6	0.3	1	-99	2	0.9	0.8	1.4
2014-02-12	12	0.2	1	-99	-99	-99	1.5	1.1	0.4	0.5	-99	-99	0.4	-99	0.1	0.9	-99	1.3	0.4	0.8	0.5	0.9	-99	0.5	0.4	0.6	1
2014-02-12	13	0.2	0.5	-99	-99	-99	1	0.8	0.5	0.5	-99	-99	0.7	-99	0.1	0.4	-99	0.8	0.4	0.5	0.5	0.8	-99	0.2	0.3	0.6	0.8
2014-02-12	14	0.2	0.3	-99	-99	-99	0.9	0.7	0.4	0.6	-99	-99	0.7	-99	0.3	0.5	-99	0.7	0.3	0.6	0.4	0.6	-99	0.4	0.5	0.5	0.5
2014-02-12	15	0.1	0.3	-99	-99	-99	0.8	0.5	0.4	0.6	-99	-99	0.8	-99	0.3	0.5	-99	0.6	0.3	0.7	0.6	0.5	-99	0.4	0.6	0.4	0.5
2014-02-12	16	0.2	0.3	-99	-99	-99	0.6	0.3	0.1	0.4	-99	-99	0.5	-99	0.2	0.4	-99	0.4	0.2	0.6	0.6	0.6	-99	0.3	0.6	0.4	0.4
2014-02-12	17	0.2	0.3	-99	-99	-99	0.5	0.4	0.1	0.3	-99	-99	0.4	-99	0.2	0.2	-99	0.3	0.2	0.5	0.5	0.4	-99	0.3	0.6	0.4	0.4
2014-02-12	18	0.2	0.4	-99	-99	-99	0.5	0.3	0.1	0.5	-99	-99	0.5	-99	0.2	0.2	-99	0.3	0.2	0.4	0.4	0.6	-99	0.2	0.4	0.4	0.4
2014-02-12	19	0.4	0.4	-99	-99	-99	0.6	0.7	0.2	0.7	-99	-99	0.5	-99	0.4	0.4	-99	0.6	0.4	0.7	0.6	0.7	-99	0.3	0.5	0.7	0.6
2014-02-12	20	0.4	0.8	-99	-99	-99	1.1	1.3	0.4	1.5	-99	-99	0.8	-99	1	0.8	-99	1	0.7	1.3	0.7	1.2	-99	0.6	1.2	1	0.8
2014-02-12	21	0.2	0.8	-99	-99	-99	1.1	1.8	0.5	1.5	-99	-99	1	-99	0.9	0.8	-99	1	0.6	2.2	1.1	1.1	-99	1.5	1.5	0.8	0.6
2014-02-12	22	0.2	0.6	-99	-99	-99	0.7	0.4	0.2	0.7	-99	-99	0.7	-99	0.8	0.7	-99	0.5	0.5	1.5	1.3	0.9	-99	0.7	0.8	0.9	0.8
2014-02-12	23	0.3	0.5	-99	-99	-99	0.9	0.3	0.4	0.8	-99	-99	0.9	-99	0.7	0.7	-99	0.6	0.8	1.2	0.9	0.8	-99	0.8	1.1	0.7	1
2014-02-12	24	-99	0.4	-99	-99	-99	0.8	0.3	0.2	0.5	-99	-99	0.7	-99	1.1	0.4	-99	0.5	0.7	0.8	0.6	0.6	-99	0.7	0.7	0.5	-99
2014-02-13	1	-99	0.3	-99	-99	-99	0.5	0.3	0.2	0.4	-99	-99	0.4	-99	0.5	0.4	-99	0.4	0.5	0.7	0.7	0.4	-99	0.7	0.5	0.5	-99
2014-02-13	2	-99	0.3	-99	-99	-99	0.6	0.3	0.1	0.4	-99	-99	0.3	-99	0.2	0.3	-99	0.4	0.6	0.6	0.6	0.4	-99	0.7	0.6	0.6	-99
2014-02-13	3	-99	0.4	-99	-99	-99	0.4	0.3	0.2	0.6	-99	-99	0.6	-99	0.1	0.3	-99	0.3	0.4	0.5	0.4	0.5	-99	0.3	0.5	0.6	-99
2014-02-13	4	-99	0.4	-99	-99	-99	0.4	0.3	0.3	0.5	-99	-99	0.4	-99	0	0.3	-99	0.2	0.3	0.4	0.3	0.5	-99	0.4	0.4	0.5	-99
2014-02-13	5	-99	0.4	-99	-99	-99	0.4	0.3	0.3	0.4	-99	-99	0.7	-99	0.2	0.1	-99	0.2	0.8	0.5	0.6	0.4	-99	0.5	0.5	0.6	-99
2014-02-13	6	0.4	0.7	-99	-99	-99	0.5	0.6	0.4	0.9	-99	-99	1.2	-99	0.9	0.2	-99	0.3	0.7	0.7	1	0.8	-99	0.4	0.8	1.1	1.1
2014-02-13	7	0.5	1.8	-99	-99	-99	1	1.6	1.3	1.5	-99	-99	1.4	-99	1.8	0.6	-99	0.6	2	1.4	0.8	1.6	-99	0.8	2	1.5	2.5
2014-02-13	8	0.9	2.4	-99	-99	-99	1.6	4.1	2	2.3	-99	-99	4	-99	3.6	1.3	-99	0.9	4.4	1.7	-99	2.6	-99	1.1	3.4	2.5	2.7
2014-02-13	9	0.8	2.2	-99	-99	-99	1.2	3.2	1.8	1.7	-99	-99	3.1	-99	4.8	1.5	-99	0.5	2.3	3.3	-99	2.5	-99	1.6	2.3	2	2.6
2014-02-13	10	-99	1.6	-99	-99	-99	0.6	3	1.8	2.8	-99	-99	2	-99	3.3	1.1	-99	1	1.4	1.9	0.9	2.1	-99	0.8	1.5	1.5	2.5
2014-02-13	11	-99	1.9	-99	-99	-99	1.4	2.4	1.5	2.4	-99	-99	1.3	-99	1.1	0.9	-99	1.2	0.7	1	0.8	1.9	-99	0.8	2	1.2	1.7
2014-02-13	12	0.3	1.2	-99	-99	-99	1.4	1.5	0.6	0.9	-99	-99	0.6	-99	0.5	0.8	-99	1.1	0.3	0.9	0.5	1.1	-99	0.6	1.2	1.1	0.9
2014-02-13	13	0.3	0.5	-99	-99	-99	1.4	0.8	0.3	0.5	-99	-99	0.6	-99	0.1	0.9	-99	1.2	0.3	0.7	0.5	0.7	-99	0.5	0.5	0.6	0.8
2014-02-13	14	0.3	0.5	-99	-99	-99	1	0.5	0.3	0.5	-99	-99	0.6	-99	0.1	0.6	-99	0.9	0.5	0.5	0.6	0.6	-99	0.3	0.6	0.5	0.7
2014-02-13	15	0.3	0.5	-99	-99	-99	0.8	0.6	0.4	0.5	-99	-99	0.7	-99	0.2	0.5	-99	0.6	0.4	0.5	0.5	0.6	-99	0.3	-99	0.5	0.9
2014-02-13	16	0.2	0.5	-99	-99	-99	0.8	0.6	0.5	0.6	-99	-99	0.8	-99	0.2	0.5	-99	0.7	0.4	0.5	0.4	0.6	-99	0.3	-99	-99	0.9
2014-02-13	17	0.3	0.5	-99	-99	-99	0.8	0.7	0.5	0.7	-99	-99	0.6	-99	0.1	0.6	-99	0.7	0.4	0.6	0.5	0.8	-99	0.4	-99	0.4	0.7
2014-02-13	18	0.4	0.5	-99	-99	-99	0.9	1	0.5	0.8	-99	-99	0.7	-99	0.2	0.6	-99	0.8	0.5	0.7	0.6	0.9	-99	0.4	0.9	0.4	0.8
2014-02-13	19	0.8	0.9	-99	-99	-99	1.1	2	0.7	1.3	-99	-99	0.9	-99	0.8	0.9	-99	1	0.7	0.9	0.5	1.8	-99	0.5	1.1	0.7	1.3
2014-02-13	20	1.4	1.2	-99	-99	-99	0.8	2.3	1.1	1.1	-99	-99	-99	-99	0.8	0.7	-99	0.6	1	1	0.5	2.2	-99	0.4	0.7	1.9	1.9
2014-02-13	21	0.5	0.7	-99	-99	-99	0.6	2.3	0.9	1.2	-99	-99	-99	-99	0.9	0.7	-99	0.5	1	1.2	0.4	1.4	-99	0.5	0.9	1.4	1.5
2014-02-13	22	0.5	0.9	-99	-99	-99	0.6	3.6	1	1.2	-99	-99	1.7	-99	0.9	1.1	-99	0.5	1.4	1.2	1.4	2.3	-99	0.5	1	1.9	1.8
2014-02-13	23	0.9	1.3	-99	-99	-99	0.6	2.2	1.3	1.2	-99	-99	2.1	-99	0.8	0.7	-99	0.5	1.5	2.9	1.2	1.5	-99	0.5	0.7	1.6	2.3
2014-02-13	24	0.6	1	-99	-99	-99	0.5	1.6	1.1	1	-99	-99	1.7	-99	0.5	0.5	-99	0.4	1.7	1.7	0.6	1.3	-99	-99	1	2.2	2.7
2014-02-14	1	0.5	0.6	-99	-99	-99	0.5	1.1	1	1.1	-99	-99	1.9	-99	0.3	0.4	-99	0.5	1.8	0.9	0.7	1	-99	-99	0.9	2.3	1.7
2014-02-14	2	0.4	0.7	-99	-99	-99	0.4	1.1	0.8	0.7	-99	-99	1.6	-99	0.2	0.6	-99	0.4	2.2	0.9	0.6	0.7	-99	-99	0.7	1.5	1.9
2014-02-14	3	0.3	0.8	-99	-99	-99	0.4	0.7	0.8	0.7	-99	-99	1.1	-99	0.8	0.4	-99	0.4	1.4	1	0.5	0.7	-99	-99	0.6	1.3	1.5
2014-02-14	4	0.3	0.9	-99	-99	-99	0.4	0.7	1	0.8	-99	-99	1.3	-99	0.8	0.4	-99	0.3	1.4	1	0.3	0.8	-99	-99	0.6	1	1.4
2014-02-14	5	0.3	0.8	-99	-99	-99	0.4	0.8	0.9	0.9	-99	-99	1.2	-99	0.6	0.3	-99	0.3	1.1	1.1	0.5	0.8	-99	-99	0.9	0.9	1.1
2014-02-14	6	0.5	0.9	-99	-99	-99	0.4	1	0.8	1.5	-99	-99	1.7	-99	0.9	0.4	-99	0.5	0.7	1	0.8	0.9	-99	0.5	1	1	1.5
2014-02-14	7	0.6	2.2	-99	-99	-99	0.6	2	1.2	2.3	-99	-99	2.5	-99	2.1	0.8	-99	0.5	2.5	2	1	1.9	-99	0.8	1.8	1.3	3
2014-02-14	8	1	3.1	-99	-99	-99	0.8	4.1	3	4.5	-99	-99	3.5	-99	2.5	1.2	-99	0.6	3.5	4.1	0.7	2.8	-99	1.8	4.1	2.2	4.8
2014-02-14	9	0.8	3.5	-99	-99	-99	0.7	3.2	3.2	4.2	-99	-99	1.6	-99	2.4	1.5	-99	0.7	2.6	2.7	1.9	4	-99	1.9	4.3	2.1	3.8
2014-02-14	10	0.6	1.9	-99	-99	-99	0.6	2.7	1.7	2	-99	-99	1.8	-99	1.4	1.4	-99	1.2	1.7	1.7	1	3	-99	1.2	2.4	1.9	3.2
2014-02-14	11	0.4	1.4	-99	-99	-99	1.7	1.8	1.2	1.1	-99	-99	1.6	-99	0.7	1.5	-99	-99	1.1	-99	1	1.9	-99	1.5	1	1.2	2.1
2014-02-14	12	0.3	0.9	-99	-99	-99	1.2	1.1	0.6	0.7	-99	-99	0.9	-99	0.3	0.8	-99	-99	0.6	0.9	-99	0.9	-99	0.5	0.5	0.4	1.1
2014-02-14	13	0.3	0.7	-99	-99	-99	1.1	0.7	0.5	0.4	-99	-99	0.8	-99	0.2	0.5	-99	-99	0.5	0.6	-99	0.9	-99	0.3	0.5	0.2	0.7
2014-02-14	14	0.2	0.5	-99	-99	-99	1	0.9	0.5	0.6	-99	-99	1	-99	0.3	0.6	-99	-99	0.6	0.6	0.6	0.8	-99	0.4	0.8	0.2	0.6
2014-02-14	15	0.2	0.4	-99	-99	-99	1	0.7	0.4	0.8	-99	-99	0.9	-99	0.5	0.7	-99	-99	0.5	0.8	0.7	0.6	-99	0.5	1.1	0.2	0.5
2014-02-14	16	0.2	0.4	-99	-99	-99	0.8	0.4	0.3	-99	-99	-99	0.6	-99	0.2	0.7	-99	0.6	0.3	0.9	0.8	0.7	-99	0.6	0.9	0.2	0.4
2014-02-14	17	0.2	0.3	-99	-99	-99	0.6	0.4	-99	0.4	-99	-99	0.7	-99	0.3	0.5	-99	0.4	0.3	0.6	0.8	0.7	-99	0.4	0.8	0.2	0.5
2014-02-14	18	0.3	0.4	-99	-99	-99	0.6	0.6	-99	0.5	-99	-99	0.7	-99	0.5	0.4	-99	0.5	0.3	0.6	0.8	0.8	-99	0.3	0.7	0.3	0.4
2014-02-14	19	0.4	0.7	-99	-99	-99	1.1	0.9	0.3	0.8	-99	-99	0.7	-99	1.1	0.6	-99	0.7	0.4	0.9	1.2	0.9	-99	0.5	0.8	0.6	0.6
2014-02-14	20	0.4	1	-99	-99	-99	1	1.7	0.4	1.3	-99	-99	1.2	-99	1.5	0.9	-99	0.9	0.7	1.9	1.1	1.3	-99	1	1.6	1	0.6
2014-02-14	21	0.3	0.7	-99	-99	-99	0.9	2.3	0.9	1.6	-99	-99	1	-99	1.5	1.2	-99	1.3	0.9	2.1	1	1.8	-99	1.2	1.6	1	0.9
2014-02-14	22	0.5	1	-99	-99	-99	1.1	2.3	0.5	1.2	-99	-99	0.8	-99	1.8	1.3	-99	1	0.6	1.7	1	1	-99	1.5	1.9	1.1	0.8
2014-02-14	23	0.5	1.2	-99	-99	-99	1.2	2.9	0.8	1.7	-99	-99	1.7	-99	2.2	1.2	-99	1	1.3	2.2	1	1.7	-99	1.7	2	1.4	1
2014-02-14	24	0.4	1.5	-99	-99	-99	0.8	1.5	1.1	2.2	-99	-99	2.2	-99	2.1	0.7	-99	0.8	2	1.7	1.8	1.4	-99	1.8	2.1	2.2	0.7
2014-02-15	1	0.4	0.7	1.1	-99	-99	0.6	1.1	0.7	1.6	-99	-99	1.9	-99	-99	0.5	-99	0.6	2.5	1.7	1.5	1.7	-99	1.8	2.9	1.5	1.4
2014-02-15	2	0.4	0.5	0.8	-99	-99	0.7	1.4	1.2	2	-99	-99	1.6	-99	0.8	0.3	-99	0.5	2.7	2	1.2	1.1	-99	1.1	2.9	1.2	2.5
2014-02-15	3	0.4	0.4	0.7	-99	-99	0.8	0.7	1	1.4	-99	-99	2.4	-99	0.4	0.4	-99	0.4	1.5	1.6	1.4	1	-99	1	1.5	1.4	2.5
2014-02-15	4	0.3	0.5	0.6	-99	-99	0.7	0.6	1	1.4	-99	-99	1.8	-99	0.4	0.5	-99	0.4	1.4	1.2	1.4	1	-99	0.7	0.9	1.3	2
2014-02-15	5	0.2	0.5	0.6	-99	-99	0.7	0.6	1.3	1.4	-99	-99	1.8	-99	0.4	0.3	-99	0.4	1.4	1.2	1.1	0.9	-99	0.8	1	1	2.3
2014-02-15	6	0.3	0.5	0.7	-99	-99	0.6	0.6	0.8	2.5	-99	-99	1.6	-99	0.8	0.4	-99	0.5	2.1	1.3	1	0.9	-99	1.3	1.2	0.9	4.3
2014-02-15	7	0.4	0.7	0.8	-99	-99	0.5	0.8	0.3	1	-99	-99	1.5	-99	0.8	0.4	-99	0.6	3.6	1.7	1.4	0.9	-99	1.9	1.7	0.8	4.6
2014-02-15	8	0.5	0.6	1.1	-99	-99	0.6	2.5	0.5	1.2	-99	-99	1.8	-99	1.9	0.8	-99	0.5	2.8	2.3	1.9	2.1	-99	2.1	2.5	1.9	4.6
2014-02-15	9	0.6	0.7	1.6	-99	-99	0.5	2.1	0.7	1	-99	-99	1.7	-99	2.3	0.8	-99	0.4	2.3	2.2	1.4	2.2	-99	2.4	2.6	2.4	3.8
2014-02-15	10	0.4	0.5	0.8	-99	-99	0.4	0.6	0.4	0.7	-99	-99	1.2	-99	1.6	0.4	-99	0.4	1.8	1	1.3	1.4	-99	1.3	2	0.8	2.3
2014-02-15	11	0.3	0.4	0.7	-99	-99	0.4	0.6	0.5	0.6	-99	-99	1.1	-99	1.1	0.3	-99	0.4	0.8	0.6	0.7	1.1	-99	0.6	1.1	0.4	1.2
2014-02-15	12	0.2	0.5	0.7	-99	-99	0.5	0.6	0.4	0.7	-99	-99	0.7	-99	0.5	0.4	-99	0.4	0.5	0.5	0.9	0.9	-99	0.5	0.7	0.2	0.6
2014-02-15	13	0.2	0.5	0.4	-99	-99	0.6	0.6	0.1	0.4	-99	-99	0.4	-99	0.2	0.4	-99	0.5	0.3	0.5	0.7	0.7	-99	0.4	0.5	0.2	-99
2014-02-15	14	0.1	0.3	0.3	-99	-99	0.6	0.6	0	0.4	-99	-99	0.4	-99	0.1	0.3	-99	0.3	0.2	0.3	0.4	0.9	-99	0.3	0.4	0.2	-99
2014-02-15	15	0.1	0.4	0.4	-99	-99	0.5	0.4	0	0.3	-99	-99	0.5	-99	0.2	0.3	-99	0.4	0.2	0.3	0.4	0.5	-99	0.2	0.5	0.2	0.4
2014-02-15	16	0.1	0.3	0.4	-99	-99	0.5	0.4	0.1	0.3	-99	-99	0.5	-99	0.2	0.3	-99	0.4	0.2	0.4	0.4	0.4	-99	0.2	0.5	0.2	0.3
2014-02-15	17	0.2	0.3	0.3	-99	-99	0.5	0.4	0.1	0.3	-99	-99	0.4	-99	0.2	0.3	-99	0.4	0.2	0.4	0.4	0.5	-99	0.2	0.5	0.2	0.3
2014-02-15	18	0.1	0.4	0.4	-99	-99	0.5	0.4	0.1	0.3	-99	-99	0.7	-99	0.3	0.3	-99	0.4	0.3	0.4	0.5	0.5	-99	0.2	0.6	0.2	0.4
2014-02-15	19	0.2	0.5	0.4	-99	-99	0.6	0.5	0.1	0.4	-99	-99	0.9	-99	0.4	0.3	-99	0.4	0.3	0.6	0.7	0.6	-99	0.3	0.6	0.3	0.3
2014-02-15	20	0.2	0.5	0.4	-99	-99	0.7	0.6	0.1	0.6	-99	-99	0.6	-99	0.6	0.4	-99	0.5	0.4	0.6	1	0.6	-99	0.3	0.5	0.5	0.6
2014-02-15	21	0.2	0.7	0.5	-99	-99	0.8	0.7	0.2	0.6	-99	-99	0.6	-99	0.6	0.4	-99	0.5	0.4	0.6	0.7	0.8	-99	0.3	0.5	0.6	0.9
2014-02-15	22	0.2	0.7	0.8	-99	-99	0.7	0.7	0.2	0.7	-99	-99	0.5	-99	0.5	0.7	-99	0.8	0.4	0.8	0.6	0.7	-99	0.5	0.7	0.6	0.9
2014-02-15	23	0.2	0.7	0.6	-99	-99	0.7	0.4	0.3	0.8	-99	-99	0.8	-99	0.8	0.7	-99	0.7	0.6	1.4	0.7	0.8	-99	0.7	0.9	0.7	1
2014-02-15	24	0.3	0.5	0.8	-99	-99	0.6	0.5	0.4	0.7	-99	-99	0.9	-99	-99	0.5	-99	-99	0.8	1	0.7	0.9	-99	1.5	1.3	1	-99
2014-02-16	1	0.3	0.5	0.9	-99	-99	0.5	0.5	0.4	0.6	-99	-99	0.8	-99	-99	0.3	-99	-99	0.8	0.6	0.7	0.8	-99	1.1	0.9	1.2	-99
2014-02-16	2	0.4	0.4	0.8	-99	-99	0.5	0.5	0.4	0.6	-99	-99	0.6	-99	-99	0.3	-99	-99	0.8	0.5	0.8	0.9	-99	1.3	1.1	1.1	-99
2014-02-16	3	0.3	0.4	0.6	-99	-99	0.3	0.7	0.4	1	-99	-99	0.5	-99	-99	0.3	-99	-99	1.1	1.4	0.5	0.7	-99	0.8	1.7	0.9	-99
2014-02-16	4	0.3	0.5	0.4	-99	-99	0.4	0.7	0.9	1.5	-99	-99	0.9	-99	-99	0.2	-99	-99	1.1	1.1	0.5	0.7	-99	0.7	1.2	0.7	-99
2014-02-16	5	0.3	0.5	0.4	-99	-99	0.4	0.9	1.1	1.2	-99	-99	0.9	-99	-99	0.2	-99	-99	0.9	0.9	1	0.6	-99	0.7	0.9	0.9	-99
2014-02-16	6	0.3	0.7	0.5	-99	-99	0.4	0.6	0.8	1.3	-99	-99	0.9	-99	-99	0.2	-99	0.3	0.8	0.8	0.6	0.5	-99	0.5	1.4	0.7	-99
2014-02-16	7	0.3	0.8	0.9	-99	-99	0.5	0.8	0.9	1.5	-99	-99	1.4	-99	-99	0.7	-99	0.4	1	0.7	0.6	0.7	-99	0.5	1.6	0.7	-99
2014-02-16	8	0.4	1.3	1.4	-99	-99	0.6	1.5	1.5	1.7	-99	-99	1.7	-99	-99	0.7	-99	0.6	1.3	1.2	0.7	1.1	-99	0.9	2.5	1.2	-99
2014-02-16	9	0.5	1.5	1.3	-99	-99	0.5	1.5	1.6	1.6	-99	-99	2	-99	-99	0.7	-99	0.7	1.7	1.1	1.9	1.4	-99	1.3	1.9	1.3	-99
2014-02-16	10	0.4	0.9	1.4	-99	-99	0.5	1.1	1.2	2	-99	-99	1.8	-99	-99	0.8	-99	0.8	1.6	1.1	0.9	1.1	-99	0.6	1.5	1.1	-99
2014-02-16	11	0.4	1.1	1.1	-99	-99	0.6	1.2	1.1	1.6	-99	-99	1.5	-99	-99	0.6	-99	0.8	1.1	0.9	0.7	1.1	-99	0.4	1.6	0.7	-99
2014-02-16	12	0.2	0.9	0.5	-99	-99	0.6	0.7	-99	1	-99	-99	1.1	-99	-99	0.6	-99	0.8	0.9	0.8	0.4	1	-99	0.8	1.3	0.3	-99
2014-02-16	13	0.2	0.5	0.4	-99	-99	0.4	0.5	0.5	0.7	-99	-99	0.9	-99	-99	0.6	-99	0.5	0.6	0.8	0.7	0.8	-99	0.6	0.8	0.2	-99
2014-02-16	14	0.1	0.4	0.5	-99	-99	0.4	0.4	0.2	0.5	-99	-99	0.6	-99	-99	0.4	-99	0.4	0.4	0.4	0.5	0.6	-99	0.3	0.8	0.1	-99
2014-02-16	15	0.1	0.5	0.5	-99	-99	0.4	0.4	0.3	0.5	-99	-99	0.5	-99	-99	0.3	-99	0.3	0.2	0.2	0.5	0.7	-99	0.3	0.9	0.2	-99
2014-02-16	16	0.1	0.4	0.5	-99	-99	0.5	0.4	0.2	0.4	-99	-99	0.4	-99	-99	0.3	-99	0.4	0.2	0.4	0.5	0.6	-99	0.3	0.9	0.2	-99
2014-02-16	17	0.1	0.4	0.4	-99	-99	0.5	0.5	0.1	0.4	-99	-99	0.3	-99	-99	0.4	-99	0.4	0.2	0.3	0.5	0.6	-99	0.3	0.9	0.2	-99
2014-02-16	18	0.2	0.4	0.5	-99	-99	0.6	0.5	-99	0.4	-99	-99	0.4	-99	-99	0.3	-99	0.4	0.3	0.3	0.5	0.7	-99	0.2	0.9	0.2	-99
2014-02-16	19	0.2	0.6	0.9	-99	-99	0.8	0.9	0.3	0.9	-99	-99	0.8	-99	-99	0.6	-99	0.7	0.6	0.5	0.4	0.8	-99	0.4	0.9	0.3	-99
2014-02-16	20	0.2	0.7	1	-99	-99	0.9	1.3	0.7	1.3	-99	-99	0.9	-99	-99	0.7	-99	0.7	0.8	0.9	0.5	0.9	-99	0.4	0.8	0.5	-99
2014-02-16	21	0.2	0.6	0.8	-99	-99	0.7	0.6	0.6	1.5	-99	-99	1	-99	-99	0.5	-99	0.5	0.7	1.3	0.7	0.6	-99	0.6	1.4	0.5	-99
2014-02-16	22	0.2	0.8	0.7	-99	-99	0.9	0.4	0.4	1.1	-99	-99	0.9	-99	-99	0.4	-99	0.7	0.6	1.2	1.7	0.7	-99	0.8	1.4	0.7	-99
2014-02-16	23	0.3	0.6	0.6	-99	-99	1	0.4	0.3	0.8	-99	-99	0.8	-99	-99	0.5	-99	0.9	0.7	0.7	1.5	0.9	-99	1	1	0.7	-99
2014-02-16	24	0.2	0.5	0.6	-99	-99	1.3	0.4	0.2	0.6	-99	-99	0.7	-99	-99	0.5	-99	0.6	0.6	0.8	0.8	-99	-99	1	1.4	0.6	-99
2014-02-17	1	0.3	0.4	0.5	-99	-99	0.7	0.4	0.2	0.6	-99	-99	0.6	-99	-99	0.3	-99	0.5	0.9	1.2	0.7	-99	-99	1	1	0.4	-99
2014-02-17	2	0.3	0.5	0.4	-99	-99	0.4	0.4	0.1	1.1	-99	-99	0.5	-99	-99	0.3	-99	0.3	1	1.2	0.8	-99	-99	0.7	1	0.4	-99
2014-02-17	3	0.2	0.4	0.4	-99	-99	0.4	0.3	0.3	1	-99	-99	0.6	-99	-99	0.2	-99	0.3	1	0.8	0.6	-99	-99	0.6	0.7	0.4	-99
2014-02-17	4	0.1	0.4	0.2	-99	-99	0.4	0.3	0.4	0.7	-99	-99	0.7	-99	-99	0.2	-99	0.3	0.6	0.4	0.7	-99	-99	0.6	0.7	0.5	-99
2014-02-17	5	0.3	0.4	0.4	-99	-99	0.4	0.3	0.4	0.7	-99	-99	0.6	-99	-99	0.2	-99	0.3	0.7	0.4	0.5	-99	-99	0.6	0.9	0.6	-99
2014-02-17	6	0.3	0.8	0.6	-99	-99	0.5	0.6	0.5	1.1	-99	-99	1.3	-99	-99	0.3	-99	0.4	1.6	0.4	0.9	0.8	-99	0.6	1.1	0.9	-99
2014-02-17	7	0.5	1.9	1.6	-99	-99	1	1.6	0.9	2.1	-99	-99	2.5	-99	-99	0.6	-99	0.7	2.2	1.6	2.3	2.4	-99	1	1.7	1.2	-99
2014-02-17	8	0.8	3.2	2.9	-99	-99	1.7	4.3	2.1	3.7	-99	-99	4	-99	-99	0.9	-99	0.9	4.6	3.1	2.4	3.4	-99	1.4	2.7	2.1	-99
2014-02-17	9	0.9	2.8	3	-99	-99	1.1	3.3	3.3	2.7	-99	-99	2.2	-99	-99	2.3	-99	0.8	2.6	2	1.9	3.1	-99	1.8	3	1.9	-99
2014-02-17	10	0.7	1.7	2.3	-99	-99	1	3.3	2.8	1.8	-99	-99	1.6	-99	-99	2.3	-99	1.1	1.3	1.5	1	2.1	-99	1.1	2.6	1.6	-99
2014-02-17	11	0.5	1.5	1.3	-99	-99	0.9	3	2.4	1.6	-99	-99	1.8	-99	-99	1.6	-99	-99	0.9	1.1	0.7	2.2	-99	0.6	1.6	1	-99
2014-02-17	12	0.2	1.1	0.8	-99	-99	0.6	1.6	1.3	1.1	-99	-99	1.5	-99	-99	0.9	-99	-99	0.7	0.9	0.3	1.2	-99	0.6	1.4	0.5	-99
2014-02-17	13	0.2	0.7	0.6	-99	-99	0.5	0.7	0.6	0.7	-99	-99	1.1	-99	-99	0.6	-99	-99	0.8	0.7	0.6	0.7	-99	0.5	0.9	0.3	-99
2014-02-17	14	0.1	0.4	0.5	-99	-99	0.6	0.5	0.4	0.8	-99	-99	1	-99	-99	0.5	-99	0.5	0.3	0.6	-99	0.5	-99	0.4	0.8	0.3	-99
2014-02-17	15	0.1	0.3	0.3	-99	-99	0.6	0.5	0.3	0.6	-99	-99	0.6	-99	-99	0.5	-99	0.5	0.2	0.6	-99	0.6	-99	0.5	0.7	0.2	-99
2014-02-17	16	0.1	0.3	0.4	-99	-99	0.6	0.4	0.3	0.4	-99	-99	0.7	-99	-99	0.5	-99	0.6	0.2	0.6	-99	0.5	-99	0.4	0.8	0.2	-99
2014-02-17	17	0.1	0.4	0.3	-99	-99	0.7	0.5	0.2	0.5	-99	-99	0.7	-99	-99	0.5	-99	0.6	0.2	0.5	0.6	0.7	-99	0.2	0.9	0.2	-99
2014-02-17	18	0.1	0.5	0.5	-99	-99	0.6	0.6	0.2	0.4	-99	-99	0.8	-99	-99	0.5	-99	0.6	0.3	0.5	0.7	0.7	-99	0.2	1	0.2	-99
2014-02-17	19	0.1	0.6	0.7	-99	-99	0.9	0.9	0.3	0.7	-99	-99	1	-99	-99	0.7	-99	1	0.4	1	0.7	0.8	-99	0.5	1.2	0.4	-99
2014-02-17	20	0.2	0.7	0.5	-99	-99	0.9	0.9	0.3	0.7	-99	-99	0.6	-99	-99	1	-99	1.2	0.4	0.9	1.3	1	-99	0.6	0.8	0.4	-99
2014-02-17	21	0.2	0.7	0.6	-99	-99	0.9	1	0.3	0.8	-99	-99	0.7	-99	-99	0.5	-99	1	0.5	0.7	1.5	1	-99	0.6	0.9	0.5	-99
2014-02-17	22	0.2	0.8	0.7	-99	-99	0.7	1.1	0.3	0.8	-99	-99	0.9	-99	-99	0.8	-99	0.9	0.7	1	1.2	0.9	-99	0.8	0.8	0.6	-99
2014-02-17	23	0.1	0.6	0.7	-99	-99	0.6	0.7	0.4	0.7	-99	-99	0.9	-99	-99	0.8	-99	0.7	0.9	1.1	0.9	1	-99	0.9	1.2	0.9	-99
2014-02-17	24	0.2	0.5	0.5	-99	-99	-99	0.6	0.3	0.6	-99	-99	-99	-99	-99	0.4	-99	0.6	0.8	1.1	1	0.6	-99	1.3	1	0.5	-99
2014-02-18	1	0.3	0.4	0.4	-99	-99	-99	0.5	0.3	0.6	-99	-99	-99	-99	-99	0.3	-99	0.4	0.8	0.9	0.6	0.5	-99	0.8	1	0.3	1
2014-02-18	2	0.3	0.4	0.6	-99	-99	-99	0.4	0.2	0.5	-99	-99	-99	-99	-99	0.2	-99	0.4	0.8	0.7	1	0.6	-99	0.6	1.2	0.3	1
2014-02-18	3	0.2	0.4	0.4	-99	-99	-99	0.2	0.2	0.8	-99	-99	-99	-99	-99	0.3	-99	0.4	0.8	0.7	0.7	0.4	-99	0.8	0.9	0.5	0.9
2014-02-18	4	0.2	0.4	0.2	-99	-99	-99	0.2	0.4	0.7	-99	-99	-99	-99	-99	0.3	-99	0.4	0.9	0.7	0.7	0.3	-99	0.7	1	0.4	1.1
2014-02-18	5	0.3	0.3	0.3	-99	-99	-99	0.3	0.3	0.8	-99	-99	-99	-99	-99	0.3	-99	0.4	1.3	0.8	0.6	0.3	-99	0.7	0.7	0.5	0.9
2014-02-18	6	0.3	0.7	0.7	-99	-99	0.5	0.6	0.8	1	-99	-99	1.1	-99	-99	0.2	-99	0.4	2	0.7	0.9	0.7	-99	0.7	1	1	1.9
2014-02-18	7	0.5	2	1.7	-99	-99	1.3	2.1	1.5	1.4	-99	-99	1.8	-99	-99	0.6	-99	0.7	3	1.1	1.2	1.4	-99	0.9	1.9	1.1	2.4
2014-02-18	8	0.9	3.1	3.6	-99	-99	2.2	4	2	2.2	-99	-99	3	-99	-99	1.6	-99	1	2.8	2.1	1	2.5	-99	1.4	3.5	2.1	3.8
2014-02-18	9	0.8	2.5	2.3	-99	-99	2	2.9	1.5	2.3	-99	-99	2.1	-99	-99	1.5	-99	0.8	2.4	1.5	3.3	2.9	-99	1.6	4.9	2	3.9
2014-02-18	10	0.5	1.7	2.2	-99	-99	1.6	3	1.5	1.6	-99	-99	1.6	-99	-99	1.3	-99	1.1	1.5	1.3	1.4	1.9	-99	0.8	3.3	2	3.1
2014-02-18	11	0.3	1.5	-99	-99	-99	1.3	2	1.5	1.2	-99	-99	1	-99	-99	0.8	-99	1.5	0.8	1.1	-99	-99	-99	0.7	-99	0.8	2.2
2014-02-18	12	0.2	1.9	-99	-99	-99	1.4	1.6	1	1	-99	-99	0.9	-99	-99	0.9	-99	1.4	0.6	1.4	-99	-99	-99	1.5	-99	0.4	1.4
2014-02-18	13	0.2	0.9	1.1	-99	-99	0.9	1.3	0.6	0.6	-99	-99	0.9	-99	-99	1.1	-99	-99	0.6	1.2	0.8	-99	-99	1.1	-99	0.3	1.1
2014-02-18	14	0.1	0.4	0.9	-99	-99	0.7	0.9	0.3	0.5	-99	-99	0.6	-99	-99	0.6	-99	-99	0.5	0.6	0.7	-99	-99	0.5	-99	0.2	1
2014-02-18	15	0.2	0.5	0.7	-99	-99	0.7	0.7	0.3	0.4	-99	-99	0.7	-99	-99	0.4	-99	-99	0.4	0.5	0.8	0.6	-99	0.3	0.8	0.2	0.6
2014-02-18	16	0.1	0.4	0.6	-99	-99	0.7	0.7	0.3	0.5	-99	-99	0.5	-99	-99	0.4	-99	0.7	0.3	0.4	0.5	0.5	-99	0.4	0.9	0.2	0.5
2014-02-18	17	0.1	0.4	0.6	-99	-99	-99	0.7	0.3	0.5	-99	-99	0.4	-99	-99	0.5	-99	0.7	0.3	0.6	0.4	0.6	-99	0.4	0.8	0.2	0.5
2014-02-18	18	0.1	0.4	0.5	-99	-99	0.7	0.7	0.2	0.6	-99	-99	0.5	-99	-99	0.5	-99	0.8	0.3	0.6	0.4	0.7	-99	0.4	0.8	0.3	0.5
2014-02-18	19	0.2	0.6	0.8	-99	-99	0.8	0.9	0.4	1	-99	-99	0.8	-99	-99	0.6	-99	1.3	0.7	0.8	0.5	0.7	-99	0.6	1	-99	0.5
2014-02-18	20	0.2	0.7	0.7	-99	-99	-99	0.8	0.9	1.2	-99	-99	1.1	-99	-99	1	-99	1.1	0.9	1.1	0.9	0.9	-99	0.7	1	0.6	0.7
2014-02-18	21	0.2	0.9	0.7	-99	-99	0.9	1.1	0.9	1.7	-99	-99	1.2	-99	-99	1	-99	1	0.9	1	1	0.8	-99	0.7	1.1	0.8	0.8
2014-02-18	22	0.2	0.9	0.6	-99	-99	0.8	1.6	0.7	2.3	-99	-99	1.5	-99	-99	0.9	-99	1.2	1.2	1.4	1.1	1	-99	1.1	1.5	1	0.9
2014-02-18	23	0.3	0.7	0.9	-99	-99	0.8	1.2	0.7	1.7	-99	-99	1.2	-99	-99	1	-99	0.9	1	1.9	1.1	1	-99	2	2.2	1.2	0.4
2014-02-18	24	0.4	0.5	0.8	-99	-99	0.6	0.8	-99	1.3	-99	-99	1.3	-99	-99	-99	-99	0.8	1.3	1.1	1	0.8	-99	2.3	1.8	0.9	0.5
2014-02-19	1	0.3	0.5	0.7	-99	-99	0.6	0.5	-99	1.1	-99	-99	0.9	-99	0.6	-99	-99	0.5	1.7	1.1	1.2	0.5	-99	1.8	1	1.2	0.9
2014-02-19	2	0.4	0.5	0.4	-99	-99	0.5	0.5	-99	1.2	-99	-99	0.7	-99	0.8	-99	-99	0.4	1	1.7	1.1	0.3	-99	1.2	1.4	1.1	1.4
2014-02-19	3	0.3	0.5	0.3	-99	-99	0.3	0.4	-99	0.9	-99	-99	1.1	-99	1	-99	-99	0.4	1.4	1	0.8	0.2	-99	0.9	1.1	0.8	0.9
2014-02-19	4	0.2	0.5	0.3	-99	-99	0.3	0.4	-99	0.9	-99	-99	1.3	-99	0.5	-99	-99	0.3	0.9	0.7	0.8	0.3	-99	0.6	0.9	0.8	0.6
2014-02-19	5	0.2	0.5	0.3	-99	-99	0.3	0.4	-99	0.8	-99	-99	1.3	-99	1.1	-99	-99	0.3	0.9	0.6	0.7	0.5	-99	0.5	0.7	0.9	1
2014-02-19	6	0.3	0.6	1.3	-99	-99	0.4	0.6	0.4	0.7	-99	-99	1.2	-99	1.9	0.2	-99	0.4	1.3	0.7	1.1	0.9	-99	0.5	0.9	0.9	2.6
2014-02-19	7	0.5	1.7	2.1	-99	-99	0.8	1.4	1.1	1.4	-99	-99	1.7	-99	3.2	0.7	-99	0.8	3	1.1	1.1	1.5	-99	0.9	1.6	1.2	2.6
2014-02-19	8	1	3.1	2.6	-99	-99	1.6	4.2	2.1	2.2	-99	-99	2.9	-99	3.1	2	-99	1.1	6.3	2	1.9	2.4	-99	1.6	3.4	1.6	2.9
2014-02-19	9	0.9	3.5	2.7	-99	-99	1.1	3.2	2.4	2.4	-99	-99	3	-99	2.3	1.9	-99	0.8	2.6	2.2	2.2	3.7	-99	1.2	4.6	2	4.2
2014-02-19	10	0.7	1.7	1.6	-99	-99	1.2	1.8	3	2.1	-99	-99	2.8	-99	2	1.9	-99	0.8	1.7	1.8	1.1	1.9	-99	1.5	2.5	1.9	2.7
2014-02-19	11	0.4	1	1.4	-99	-99	0.7	2.1	2.2	1.8	-99	-99	1.8	-99	1.9	1.3	-99	1	0.9	1.3	0.8	0.9	-99	1.2	-99	1.6	1.6
2014-02-19	12	0.4	1	1.5	-99	-99	0.4	1.3	1.2	1.1	-99	-99	1.2	-99	1.4	0.8	-99	0.7	0.8	1	-99	0.9	-99	0.6	1.5	1	-99
2014-02-19	13	0.3	0.6	0.9	-99	-99	0.5	0.5	0.6	0.5	-99	-99	0.7	-99	0.5	0.3	-99	0.6	0.4	0.4	-99	0.9	-99	0.4	0.7	0.6	-99
2014-02-19	14	0.2	0.5	0.5	-99	-99	0.5	0.5	0.5	0.5	-99	-99	0.9	-99	0.4	0.4	-99	0.7	0.4	0.5	-99	0.5	-99	0.4	0.6	0.4	-99
2014-02-19	15	0.1	0.4	0.4	-99	-99	0.7	0.5	0.6	0.7	-99	-99	0.9	-99	0.4	0.4	-99	0.8	0.4	0.4	-99	0.6	-99	0.3	0.7	0.3	0.5
2014-02-19	16	0.2	0.4	0.4	-99	-99	0.7	0.5	0.5	0.7	-99	-99	0.8	-99	0.4	0.5	-99	0.8	0.3	0.6	0.5	0.5	-99	0.4	1	0.3	0.4
2014-02-19	17	0.1	0.4	0.4	-99	-99	0.7	0.7	0.4	0.7	-99	-99	0.8	-99	0.5	0.6	-99	0.8	0.3	0.7	0.6	0.5	-99	0.5	-99	0.4	0.7
2014-02-19	18	0.2	0.4	0.5	-99	-99	0.8	0.7	0.5	0.6	-99	-99	0.7	-99	0.5	0.6	-99	0.8	0.4	0.9	0.5	0.7	-99	0.5	0.9	0.4	0.7
2014-02-19	19	0.3	0.7	0.8	-99	-99	0.7	2	0.7	1	-99	-99	0.9	-99	0.6	0.8	-99	1.1	0.7	0.6	0.4	1	-99	0.4	0.9	0.7	1
2014-02-19	20	0.3	0.8	0.6	-99	-99	0.5	1.7	0.9	1.1	-99	-99	1	-99	0.8	0.9	-99	0.7	0.9	0.8	0.5	1.4	-99	0.5	0.8	1	1.2
2014-02-19	21	0.3	0.9	0.4	-99	-99	0.5	2.5	1	1.1	-99	-99	1.1	-99	0.9	1	-99	0.6	1.1	1	0.8	1.5	-99	0.5	0.8	1.1	2.1
2014-02-19	22	0.5	0.9	0.8	-99	-99	0.5	2.6	1.1	1.1	-99	-99	1.2	-99	0.9	1.2	-99	0.6	1.5	1.2	0.8	1.5	-99	0.6	0.8	1.1	1
2014-02-19	23	0.9	0.6	1.6	-99	-99	0.4	2.1	0.7	1.2	-99	-99	1.8	-99	1	0.7	-99	0.6	1.4	1.1	0.8	1.5	-99	0.8	1.3	1.4	1.3
2014-02-19	24	-99	0.6	1.2	-99	-99	0.4	1.9	0.6	0.9	-99	-99	1.5	-99	0.7	0.5	-99	0.5	1.4	0.9	1	1.1	-99	0.7	1	1.8	-99
2014-02-20	1	-99	1	0.9	-99	-99	0.4	1.4	0.6	0.8	-99	-99	1.1	-99	0.6	0.5	-99	0.5	1.2	1.4	1.1	0.9	-99	0.6	0.9	1.3	-99
2014-02-20	2	-99	1	0.8	-99	-99	0.3	1	0.8	0.7	-99	-99	1.2	-99	0.3	0.3	-99	0.5	1.3	1.1	0.7	0.9	-99	0.6	0.7	0.8	-99
2014-02-20	3	-99	0.8	0.5	-99	-99	0.3	1	0.5	0.6	-99	-99	1.1	-99	0.2	0.6	-99	0.4	0.5	0.4	0.5	1	-99	0.3	0.5	1	-99
2014-02-20	4	-99	0.7	0.7	-99	-99	0.3	0.6	0.2	0.4	-99	-99	0.8	-99	0.2	0.4	-99	0.5	0.4	0.4	0.5	1.1	-99	0.3	0.3	0.8	-99
2014-02-20	5	-99	0.7	0.9	-99	-99	0.3	0.6	0.2	0.4	-99	-99	0.6	-99	0.4	0.4	-99	0.4	0.5	0.3	0.6	0.6	-99	0.3	0.4	0.8	-99
2014-02-20	6	0.3	0.8	1.2	-99	-99	0.4	1	0.3	0.5	-99	-99	1	-99	0.4	0.5	-99	0.5	1.5	0.4	1.1	0.8	-99	0.5	0.6	1	2.1
2014-02-20	7	0.6	2.1	1.7	-99	-99	0.5	2.5	0.7	1	-99	-99	1.9	-99	0.9	0.7	-99	0.7	2.3	0.9	1	1.6	-99	0.7	2.4	1.7	3.4
2014-02-20	8	0.9	3.5	2.6	-99	-99	0.9	4.4	1.5	1.9	-99	-99	2.1	-99	2.4	1.6	-99	1.1	2.8	1.8	0.9	2.5	-99	1.4	2.9	2.3	4.4
2014-02-20	9	0.7	3.3	1.8	-99	-99	2.1	3.6	1.7	1.9	-99	-99	1.6	-99	2.8	1.3	-99	1	1.8	1.7	1.7	2.9	-99	1.3	3.5	2.4	2.9
2014-02-20	10	0.3	2.4	1.1	-99	-99	1.6	2.4	2.1	2	-99	-99	2.1	-99	2.6	1.3	-99	1.2	1.1	1.2	1.4	2.1	-99	1	2.1	1.8	2
2014-02-20	11	0.2	1.9	0.9	-99	-99	-99	1.7	1.4	1.5	-99	-99	1.3	-99	1.8	1	-99	1.5	0.8	1.2	0.9	1.4	-99	1.4	2.1	-99	1.2
2014-02-20	12	0.1	1.2	0.5	-99	-99	-99	1.1	0.7	1.1	-99	-99	0.7	-99	0.7	0.8	-99	1.3	0.4	1.2	0.4	0.8	-99	1.1	1.2	0.9	0.5
2014-02-20	13	0.1	1.1	0.4	-99	-99	1.1	-99	0.5	0.7	-99	-99	0.5	-99	0.5	0.8	-99	1.2	0.3	-99	0.4	0.6	-99	-99	0.7	0.8	0.5
2014-02-20	14	0.1	0.9	0.4	-99	-99	1.1	0.9	0.6	0.7	-99	-99	0.7	-99	0.5	0.7	-99	1.1	0.4	0.8	0.3	0.7	-99	0.4	0.8	0.8	0.6
2014-02-20	15	0.2	0.9	0.5	-99	-99	1	1	0.6	0.7	-99	-99	0.9	-99	0.5	0.6	-99	1.1	0.5	0.7	0.3	0.8	-99	0.4	0.8	0.7	0.6
2014-02-20	16	0.2	0.9	0.7	-99	-99	0.9	1	0.5	0.6	-99	-99	0.9	-99	-99	0.5	-99	1	0.5	0.5	0.3	0.7	-99	0.3	0.8	0.8	0.8
2014-02-20	17	0.2	0.9	0.7	-99	-99	0.9	0.9	0.5	0.7	-99	-99	0.7	-99	-99	0.4	-99	0.9	0.5	0.5	0.3	1	-99	0.4	0.7	0.7	0.9
2014-02-20	18	0.2	0.9	0.6	-99	-99	0.5	1.6	0.3	0.7	-99	-99	0.6	-99	0.4	0.3	-99	0.8	0.5	0.5	0.3	1.2	-99	0.4	0.6	0.8	0.7
2014-02-20	19	0.4	0.8	0.7	-99	-99	0.4	0.8	0.4	0.9	-99	-99	0.7	-99	0.4	0.5	-99	0.8	0.6	0.7	0.4	1	-99	0.5	0.6	1.2	0.8
2014-02-20	20	0.5	0.8	1	-99	-99	0.5	0.6	0.8	1	-99	-99	1.1	-99	0.6	0.4	-99	0.7	0.9	1.1	0.5	1	-99	0.7	0.7	0.8	1.1
2014-02-20	21	0.5	0.7	0.7	-99	-99	0.6	0.6	-99	1.4	-99	-99	1.2	-99	0.5	0.5	-99	0.7	0.8	1.1	1.1	0.7	-99	0.8	1.1	0.7	1
2014-02-20	22	0.3	0.6	0.5	-99	-99	0.7	0.6	-99	1.2	-99	-99	1.1	-99	0.5	0.4	-99	0.6	1.2	1.3	0.7	0.6	-99	1.1	0.9	0.6	1.1
2014-02-20	23	0.1	0.5	0.5	-99	-99	0.6	0.5	-99	0.6	-99	-99	0.8	-99	0.7	0.3	-99	0.6	1	0.8	0.8	0.7	-99	0.9	1.3	0.6	0.5
2014-02-20	24	0.1	0.5	0.5	-99	-99	0.5	0.5	-99	0.6	-99	-99	0.9	-99	0.7	0.3	-99	0.6	1.1	0.6	0.9	0.5	-99	-99	1.3	0.6	0.5
2014-02-21	1	0.1	0.5	0.3	-99	-99	0.4	0.5	-99	0.5	-99	-99	0.8	-99	1	0.3	-99	0.6	0.7	0.5	0.7	0.4	-99	-99	1.2	0.6	0.3
2014-02-21	2	0.1	0.5	0.2	-99	-99	0.4	0.4	-99	0.4	-99	-99	0.7	-99	0.4	0.2	-99	0.5	0.5	0.5	0.4	0.3	-99	-99	0.9	0.5	0.2
2014-02-21	3	0.2	0.5	0.2	-99	-99	0.4	0.4	-99	0.4	-99	-99	0.5	-99	0.1	0.2	-99	0.5	0.2	0.3	0.5	0.3	-99	-99	0.8	0.5	0.2
2014-02-21	4	0.2	0.5	0.1	-99	-99	0.3	0.3	-99	0.3	-99	-99	0.4	-99	0.1	0.2	-99	0.4	0.2	0.2	0.3	0.2	-99	-99	0.7	0.4	0.3
2014-02-21	5	0.2	0.4	0	-99	-99	0.4	0.3	-99	0.2	-99	-99	0.4	-99	0.1	0.1	-99	0.4	0.2	0.2	0.3	0.2	-99	-99	0.5	0.4	0.2
2014-02-21	6	0.2	0.4	0.1	-99	-99	0.5	0.3	-99	-99	-99	-99	0.6	-99	0.2	0.2	-99	0.5	0.2	0.2	0.3	0.3	-99	0.3	0.6	0.5	0.4
2014-02-21	7	0.3	0.6	0.3	-99	-99	0.5	0.4	-99	0.4	-99	-99	1	-99	0.6	0.3	-99	0.7	0.5	0.6	0.5	0.6	-99	0.5	0.9	0.6	1
2014-02-21	8	0.5	0.7	0.7	-99	-99	0.7	0.7	-99	0.7	-99	-99	1.3	-99	1.3	0.6	-99	0.8	0.9	1	0.9	1.1	-99	1	1.5	1	1.2
2014-02-21	9	0.3	1	0.7	-99	-99	0.5	0.8	-99	0.9	-99	-99	1.4	-99	1	0.4	-99	0.5	0.9	0.9	0.9	0.9	-99	0.9	1.3	0.8	0.8
2014-02-21	10	0.2	0.6	0.5	-99	-99	0.5	0.7	-99	0.7	-99	-99	1.2	-99	0.6	0.4	-99	0.6	0.6	0.7	1	0.8	-99	0.7	1	0.5	0.7
2014-02-21	11	0.1	0.7	0.4	-99	-99	0.5	0.6	-99	0.7	-99	-99	1.1	-99	0.6	0.4	-99	0.6	0.5	0.7	0.8	0.7	-99	0.8	1.1	0.4	0.6
2014-02-21	12	0.1	0.6	0.5	-99	-99	0.5	0.6	-99	0.8	-99	-99	1.3	-99	0.5	0.4	-99	0.6	0.5	0.7	0.9	0.6	-99	0.8	1.1	0.3	0.5
2014-02-21	13	0.1	0.6	0.5	-99	-99	0.7	0.6	-99	0.8	-99	-99	0.8	-99	0.4	0.6	-99	0.7	0.4	0.8	1	0.8	-99	1	0.8	0.3	0.5
2014-02-21	14	0.1	0.5	0.4	-99	-99	0.7	0.6	-99	0.6	-99	-99	0.6	-99	0.2	0.7	-99	0.8	0.4	0.9	0.8	0.5	-99	0.8	0.7	0.4	0.4
2014-02-21	15	0.2	0.6	0.5	-99	-99	0.8	0.7	-99	0.5	-99	-99	0.7	-99	0.3	0.7	-99	0.9	0.4	0.8	0.7	0.7	-99	0.6	0.8	0.3	0.5
2014-02-21	16	0.2	0.7	0.5	-99	-99	0.9	0.9	-99	0.6	-99	-99	0.6	-99	0.3	0.6	-99	1	0.4	0.7	0.6	0.7	-99	0.6	0.9	0.4	0.6
2014-02-21	17	0.2	0.8	0.5	-99	-99	0.9	1	-99	0.7	-99	-99	0.7	-99	0.4	0.6	-99	1	0.5	0.7	0.4	0.7	-99	0.6	0.9	0.4	0.6
2014-02-21	18	0.3	0.9	0.6	-99	-99	0.9	1.2	-99	0.8	-99	-99	0.8	-99	0.3	0.5	-99	1	0.6	0.7	0.3	1	-99	0.5	0.7	0.7	0.8
2014-02-21	19	0.3	0.8	0.6	-99	-99	0.8	1.4	-99	0.9	-99	-99	0.8	-99	0.3	0.4	-99	0.9	0.5	0.6	0.4	1.1	-99	0.5	0.6	0.7	0.9
2014-02-21	20	0.3	0.7	0.5	-99	-99	0.8	0.7	-99	0.7	-99	-99	1.1	-99	0.5	0.5	-99	0.8	0.7	0.7	0.4	0.7	-99	0.6	0.9	0.5	0.9
2014-02-21	21	0.3	0.6	0.3	-99	-99	0.8	0.6	-99	0.6	-99	-99	1	-99	0.7	0.5	-99	0.7	0.8	1	0.4	0.7	-99	0.7	0.9	0.5	0.8
2014-02-21	22	0.2	0.6	0.3	-99	-99	0.7	0.5	-99	0.5	-99	-99	0.7	-99	0.7	0.4	-99	0.6	0.7	0.8	0.9	0.6	-99	0.7	0.8	0.5	0.6
2014-02-21	23	0.1	0.7	0.3	-99	-99	0.7	0.4	-99	0.6	-99	-99	0.7	-99	0.5	0.3	-99	0.7	0.5	0.6	1	0.7	-99	0.7	0.8	0.5	0.7
2014-02-21	24	0.1	0.8	0.2	-99	-99	0.7	0.5	-99	0.6	-99	-99	0.6	-99	0.4	0.3	-99	0.8	0.6	0.6	0.8	0.4	-99	0.6	0.7	0.5	0.8
2014-02-22	1	0.1	0.8	0.2	-99	-99	0.6	0.5	0.4	0.4	-99	-99	0.7	-99	0.3	0.3	-99	0.8	0.5	0.5	0.7	0.4	-99	0.7	0.8	0.5	0.6
2014-02-22	2	0.2	0.7	0.2	-99	-99	0.7	0.6	0.5	0.4	-99	-99	0.6	-99	-99	0.4	-99	0.7	0.5	0.5	0.7	0.4	-99	0.9	0.6	0.5	0.7
2014-02-22	3	0.2	0.7	0.3	-99	-99	0.7	0.7	0.4	0.6	-99	-99	0.7	-99	-99	0.5	-99	0.5	0.6	0.6	0.5	0.6	-99	0.8	0.5	0.6	0.6
2014-02-22	4	0.2	0.7	0.5	-99	-99	0.5	0.7	0.5	0.4	-99	-99	0.5	-99	-99	0.4	-99	0.5	0.5	0.7	0.3	0.6	-99	0.6	0.4	0.6	0.6
2014-02-22	5	0.2	0.7	0.5	-99	-99	0.5	0.7	0.4	0.5	-99	-99	0.6	-99	-99	0.3	-99	0.5	0.5	0.5	0.5	0.6	-99	0.6	0.6	0.6	0.6
2014-02-22	6	0.3	0.8	0.4	-99	-99	0.9	1.2	0.6	0.8	-99	-99	1	-99	-99	0.3	-99	0.5	0.8	0.6	0.5	0.8	-99	0.7	0.9	0.8	1.2
2014-02-22	7	0.4	1.1	1.1	-99	-99	0.9	1.3	0.8	1.1	-99	-99	1.9	-99	-99	0.4	-99	0.7	2.1	0.8	0.5	1.3	-99	0.8	1.3	1.1	1.4
2014-02-22	8	0.8	2.4	1.7	-99	-99	1.3	2.2	1	1.4	-99	-99	2	-99	-99	0.7	-99	1	2.2	1.8	1	1.6	-99	1.1	1.5	1.3	1.8
2014-02-22	9	0.8	2.3	1.5	-99	-99	1.5	1.8	1.2	1.5	-99	-99	2.4	-99	2.4	0.8	-99	0.9	1.5	1.7	1.3	1.7	-99	1	1.2	1.4	2.2
2014-02-22	10	0.5	1.4	1.4	-99	-99	1.2	1.2	2.1	1.8	-99	-99	1.8	-99	1.2	0.9	-99	1.1	1.3	1.1	0.7	1.9	-99	1	1.2	0.9	1.5
2014-02-22	11	0.3	1.2	1.4	-99	-99	0.9	1.4	1.5	1.8	-99	-99	1.6	-99	0.8	0.9	-99	1.2	1	0.9	0.8	1.5	-99	0.9	1	1.1	1
2014-02-22	12	0.3	0.9	0.8	-99	-99	0.8	0.9	0.8	1	-99	-99	1.1	-99	0.8	0.7	-99	0.9	0.7	0.8	0.5	0.9	-99	0.7	0.6	1	0.8
2014-02-22	13	0.2	0.8	0.3	-99	-99	0.9	0.7	0.5	0.6	-99	-99	0.7	-99	0.4	0.5	-99	0.8	0.3	0.5	0.3	0.6	-99	0.5	0.6	0.5	0.6
2014-02-22	14	0.2	0.7	0.4	-99	-99	0.8	0.7	0.4	0.6	-99	-99	0.7	-99	0.4	0.5	-99	0.8	0.3	0.6	0.3	0.6	-99	0.4	0.7	0.6	0.5
2014-02-22	15	0.2	0.7	0.4	-99	-99	0.7	0.9	0.5	0.5	-99	-99	0.7	-99	0.5	0.5	-99	0.8	0.4	0.5	0.3	0.8	-99	0.4	0.8	0.6	0.6
2014-02-22	16	0.2	0.7	0.5	-99	-99	0.6	1	0.4	-99	-99	-99	0.9	-99	0.4	0.5	-99	0.7	0.4	0.5	0.3	0.9	-99	0.4	0.7	0.6	0.7
2014-02-22	17	0.2	0.8	0.4	-99	-99	0.6	0.9	0.5	0.6	-99	-99	0.6	-99	0.4	0.3	-99	0.7	0.5	0.4	0.3	1	-99	0.4	0.7	0.7	0.7
2014-02-22	18	0.2	0.9	0.4	-99	-99	0.4	1	0.3	0.5	-99	-99	0.5	-99	0.4	0.2	-99	0.6	0.5	0.3	0.3	0.9	-99	0.3	0.7	0.7	0.8
2014-02-22	19	0.2	0.9	0.3	-99	-99	0.5	0.4	0.4	0.5	-99	-99	0.6	-99	-99	0.2	-99	0.5	0.5	0.4	0.3	0.5	-99	0.4	0.6	0.7	0.9
2014-02-22	20	0.2	0.5	0.2	-99	-99	0.6	0.5	0.6	0.6	-99	-99	0.7	-99	0.8	0.2	-99	0.5	0.5	0.5	0.3	0.5	-99	0.4	0.6	0.9	0.8
2014-02-22	21	0.1	0.7	0.4	-99	-99	0.5	0.8	0.7	0.8	-99	-99	0.8	-99	0.9	0.2	-99	0.5	0.6	0.6	0.3	0.6	-99	0.4	0.6	1.1	0.7
2014-02-22	22	0.2	0.7	0.8	-99	-99	0.5	1.5	0.7	0.7	-99	-99	0.8	-99	0.9	0.4	-99	0.6	0.7	1.1	0.4	1	-99	0.4	0.6	1.1	1.1
2014-02-22	23	0.2	0.9	0.6	-99	-99	0.5	1.8	0.9	1	-99	-99	0.9	-99	0.7	0.6	-99	0.6	0.9	1.1	0.4	1	-99	0.5	0.6	1.3	1.4
2014-02-22	24	0.7	1	0.3	-99	-99	0.4	1.6	0.7	0.7	-99	-99	0.9	-99	0.7	0.4	-99	-99	0.9	1	0.7	1.3	-99	0.6	0.7	1	1.8
2014-02-23	1	0.5	1	0.2	-99	-99	0.4	1.2	0.5	0.7	-99	-99	0.8	-99	0.5	0.3	-99	-99	0.8	0.8	1.1	1.2	-99	0.6	0.9	1	1.8
2014-02-23	2	0.5	0.9	0.2	-99	-99	0.4	0.8	0.7	0.8	-99	-99	1.2	-99	0.3	0.3	-99	-99	0.7	0.6	0.9	1.1	-99	0.7	0.9	0.8	1.4
2014-02-23	3	0.4	0.9	0.4	-99	-99	0.4	0.6	0.5	0.5	-99	-99	1	-99	0.2	0.4	-99	-99	0.6	0.5	0.7	0.9	-99	0.5	0.6	0.9	1.1
2014-02-23	4	0.4	0.9	0.4	-99	-99	0.3	0.5	0.5	0.5	-99	-99	0.8	-99	0.6	0.4	-99	-99	0.8	0.5	0.8	0.7	-99	0.5	0.7	1.1	1.4
2014-02-23	5	0.3	0.9	0.2	-99	-99	0.3	0.6	0.5	0.6	-99	-99	0.8	-99	0.3	0.3	-99	-99	1.1	0.5	0.3	0.7	-99	0.5	0.6	0.9	1.6
2014-02-23	6	0.3	0.8	0.3	-99	-99	0.3	0.6	0.5	0.6	-99	-99	1.1	-99	1.1	0.3	-99	0.2	1.3	0.6	0.5	0.7	-99	0.5	0.7	0.8	1.7
2014-02-23	7	0.3	0.6	0.7	-99	-99	0.4	0.7	0.7	0.7	-99	-99	1.1	-99	0.7	-99	-99	0.3	1.5	0.6	0.7	1.1	-99	0.6	0.8	1	1.8
2014-02-23	8	0.6	1	0.8	-99	-99	1	1.5	1	1.2	-99	-99	1.5	-99	1.4	-99	-99	0.7	1.3	1	1.1	1.2	-99	0.9	0.9	1.6	1.8
2014-02-23	9	0.5	1.3	1	-99	-99	1	1.3	0.9	1	-99	-99	1.7	-99	1.6	0.9	-99	0.7	1.3	1.4	1.3	1.2	-99	1	2.4	1.6	2.2
2014-02-23	10	0.2	0.9	0.9	-99	-99	0.6	0.8	1	1.2	-99	-99	1.5	-99	1.2	0.8	-99	0.4	1.3	1.2	1	1	-99	0.9	1.1	1.2	1.8
2014-02-23	11	0.2	0.6	0.5	-99	-99	0.6	0.5	0.8	1.1	-99	-99	1.5	-99	0.9	0.8	-99	0.3	1	0.9	0.6	0.8	-99	0.7	-99	0.9	1
2014-02-23	12	0.2	0.6	0.5	-99	-99	0.6	0.4	0.7	0.9	-99	-99	1.1	-99	0.6	0.5	-99	0.3	0.7	0.8	0.5	0.6	-99	0.8	1.2	0.5	0.8
2014-02-23	13	0.2	0.6	0.5	-99	-99	0.6	0.5	0.6	0.7	-99	-99	1	-99	0.4	0.4	-99	0.4	0.5	0.6	0.5	0.7	-99	0.8	0.7	0.5	0.5
2014-02-23	14	0.2	0.7	0.4	-99	-99	0.7	0.6	0.5	0.6	-99	-99	0.8	-99	0.4	0.5	-99	0.4	0.4	0.6	0.4	0.8	-99	0.8	0.7	0.5	0.5
2014-02-23	15	0.1	0.8	0.4	-99	-99	0.8	0.6	0.6	0.6	-99	-99	0.9	-99	0.5	0.5	-99	0.5	0.4	0.6	0.4	0.7	-99	0.6	0.7	0.5	0.4
2014-02-23	16	0.2	0.8	0.4	-99	-99	0.7	0.6	0.4	0.5	-99	-99	0.8	-99	0.5	0.4	-99	0.4	0.4	0.5	0.6	0.7	-99	0.6	0.7	0.5	0.5
2014-02-23	17	0.2	0.8	0.3	-99	-99	0.7	0.5	0.4	0.5	-99	-99	0.8	-99	0.4	0.4	-99	0.5	0.4	0.5	0.3	0.6	-99	0.6	0.7	0.6	0.5
2014-02-23	18	0.2	0.8	0.4	-99	-99	0.8	0.5	0.5	0.6	-99	-99	0.7	-99	0.4	0.4	-99	0.5	0.4	0.6	0.3	0.8	-99	0.4	0.5	0.6	0.4
2014-02-23	19	0.3	0.9	0.5	-99	-99	0.9	0.6	0.6	0.9	-99	-99	0.7	-99	0.5	0.7	-99	0.7	0.6	0.6	0.3	0.9	-99	0.5	0.6	0.7	0.6
2014-02-23	20	0.2	0.9	0.7	-99	-99	0.8	0.6	0.7	1.1	-99	-99	0.8	-99	0.5	0.7	-99	0.3	0.6	1	0.5	0.8	-99	0.6	0.6	0.6	0.7
2014-02-23	21	0.2	0.7	0.7	-99	-99	0.7	0.6	0.7	0.9	-99	-99	0.9	-99	0.7	0.8	-99	0.4	0.7	1.1	0.8	0.5	-99	0.6	0.8	0.6	1.1
2014-02-23	22	0.2	0.7	0.4	-99	-99	0.6	0.6	0.7	1.2	-99	-99	0.9	-99	1	0.6	-99	0.4	0.7	1.2	1.2	0.8	-99	0.7	1.2	0.8	0.6
2014-02-23	23	0.1	0.7	0.4	-99	-99	0.7	0.3	0.5	1	-99	-99	0.9	-99	1	0.5	-99	0.5	0.6	1.1	1	0.6	-99	0.8	1.1	0.6	0.6
2014-02-23	24	0.1	0.6	0.2	-99	-99	0.7	0.2	0.4	0.6	-99	-99	0.7	-99	0.8	0.4	-99	0.4	0.6	0.8	0.9	-99	-99	0.9	1.2	0.5	0.5
2014-02-24	1	0.1	0.5	0.1	-99	-99	0.8	0.2	0.2	0.3	-99	-99	0.5	-99	0.6	0.4	-99	0.3	0.3	0.4	0.6	-99	-99	0.5	0.7	0.4	0.6
2014-02-24	2	0.1	0.4	0.1	-99	-99	0.7	0.2	0.2	0.2	-99	-99	0.4	-99	0.4	0.4	-99	0.3	0.3	0.4	0.6	-99	-99	0.5	0.6	0.3	0.4
2014-02-24	3	0.1	0.4	0.1	-99	-99	0.6	0.2	0.2	0.2	-99	-99	0.4	-99	0.2	0.4	-99	0.3	0.4	0.6	0.5	-99	-99	0.6	0.5	0.3	0.4
2014-02-24	4	0.1	0.4	0.1	-99	-99	0.5	0.2	0.2	0.3	-99	-99	0.4	-99	0.3	0.3	-99	0.2	0.4	0.5	0.5	-99	-99	0.6	0.5	0.3	0.5
2014-02-24	5	0.2	0.5	0.3	-99	-99	0.5	0.3	0.3	0.6	-99	-99	0.6	-99	0.6	0.2	-99	0.2	0.4	0.4	0.6	-99	-99	0.5	0.6	0.4	0.4
2014-02-24	6	0.3	0.8	0.4	-99	-99	0.6	0.5	0.5	0.8	-99	-99	0.8	-99	1	0.3	-99	0.3	0.8	0.7	0.5	0.5	-99	0.7	0.7	1	0.9
2014-02-24	7	0.7	1.6	1	-99	-99	1.3	1.6	1.2	1.5	-99	-99	1.3	-99	1.9	0.5	-99	0.4	1.4	1	1.4	1.5	-99	1	1.8	1.6	2.1
2014-02-24	8	0.9	2.5	2.2	-99	-99	1.7	3.6	1.4	2.3	-99	-99	2.7	-99	2.4	0.9	-99	0.8	2.1	1.3	1.3	2.6	-99	1.4	2.3	2.6	3
2014-02-24	9	0.9	2.5	2	-99	-99	1	2.9	1.4	1.8	-99	-99	2.5	-99	3.2	0.9	-99	0.5	1.3	1.4	1.7	2.2	-99	1.1	1.6	2.5	2.7
2014-02-24	10	0.5	1.8	1.5	-99	-99	0.7	1.8	1.3	1.1	-99	-99	2.1	-99	1.1	0.8	-99	0.3	1.8	1.2	1	1.8	-99	0.7	0.9	2.2	1.7
2014-02-24	11	0.3	1.2	0.8	-99	-99	0.7	1.7	0.8	0.9	-99	-99	1.4	-99	1	0.7	-99	0.6	1.4	0.7	0.4	1.2	-99	0.6	0.9	1.4	1.1
2014-02-24	12	0.2	0.8	0.4	-99	-99	0.6	0.8	0.4	0.4	-99	-99	0.6	-99	0.6	0.3	-99	0.3	0.5	-99	0.3	0.7	-99	0.3	0.6	1.1	0.8
2014-02-24	13	0.1	0.7	0.3	-99	-99	0.5	0.6	0.4	0.4	-99	-99	0.7	-99	0.2	0.2	-99	0.2	0.4	-99	0.3	0.7	-99	0.3	0.6	0.6	0.6
2014-02-24	14	0.1	0.7	0.3	-99	-99	0.6	0.6	0.4	0.5	-99	-99	0.6	-99	0.2	0.2	-99	0.3	-99	-99	0.2	0.6	-99	0.3	0.6	0.7	0.5
2014-02-24	15	0.1	0.6	0.5	-99	-99	0.5	0.6	0.3	0.5	-99	-99	0.6	-99	0.3	0.2	-99	0.3	0.3	-99	0.2	0.7	-99	0.4	0.8	0.6	0.5
2014-02-24	16	0.1	0.6	0.5	-99	-99	0.5	0.7	0.3	0.5	-99	-99	0.7	-99	0.3	0.3	-99	0.3	0.4	0.7	0.3	0.5	-99	0.4	0.9	0.4	0.4
2014-02-24	17	0.1	0.7	0.4	-99	-99	0.6	0.7	0.5	0.5	-99	-99	0.6	-99	0.3	0.3	-99	0.3	0.4	0.6	0.3	0.7	-99	0.4	1	0.5	0.5
2014-02-24	18	0.2	0.8	0.5	-99	-99	0.7	0.8	0.6	0.7	-99	-99	0.6	-99	0.4	0.4	-99	0.5	0.5	0.7	0.3	0.8	-99	0.4	0.8	0.6	0.7
2014-02-24	19	0.2	0.8	0.6	-99	-99	0.7	0.5	0.6	0.8	-99	-99	0.8	-99	0.5	0.5	-99	0.5	0.5	0.7	0.3	0.9	-99	0.5	0.7	0.7	0.8
2014-02-24	20	0.2	0.8	0.6	-99	-99	0.6	0.4	0.8	1	-99	-99	1	-99	0.7	0.6	-99	0.5	0.7	1.1	0.3	1.1	-99	0.5	0.7	0.6	0.6
2014-02-24	21	0.2	0.8	0.6	-99	-99	0.6	0.6	0.9	1.1	-99	-99	0.9	-99	0.8	0.5	-99	0.4	0.8	1.2	0.4	0.7	-99	0.6	0.8	0.6	0.8
2014-02-24	22	0.3	0.8	0.4	-99	-99	0.7	0.4	0.5	0.8	-99	-99	0.9	-99	-99	0.3	-99	0.3	0.7	0.9	0.6	0.7	-99	0.7	0.8	0.6	0.5
2014-02-24	23	0.2	0.7	0.4	-99	-99	0.6	0.4	0.5	0.7	-99	-99	0.9	-99	0.5	0.4	-99	0.4	0.5	0.9	0.6	0.7	-99	0.6	0.9	0.7	0.7
2014-02-24	24	0.2	0.8	0.4	-99	-99	-99	0.6	0.5	0.5	-99	-99	-99	-99	0.5	0.4	-99	0.2	0.6	0.8	0.5	0.7	-99	0.7	0.9	0.8	0.7
2014-02-25	1	0.2	0.9	0.3	-99	-99	-99	0.5	0.5	0.5	-99	-99	-99	-99	0.6	0.3	-99	0.2	0.6	0.8	0.4	0.6	-99	0.8	0.8	0.6	0.8
2014-02-25	2	0.2	0.6	0.3	-99	-99	-99	0.3	0.3	0.4	-99	-99	-99	-99	0.3	0.2	-99	0.2	0.5	0.6	0.4	0.5	-99	0.6	0.8	0.6	0.5
2014-02-25	3	0.2	0.5	0.1	-99	-99	-99	0.3	0.3	0.4	-99	-99	-99	-99	0.2	0.2	-99	0.2	0.5	0.8	0.4	0.3	-99	0.5	0.5	0.6	0.5
2014-02-25	4	0.2	0.5	0.1	-99	-99	-99	0.3	0.3	0.4	-99	-99	-99	-99	0.2	0.3	-99	0.2	0.4	0.6	0.4	0.3	-99	0.5	0.5	0.5	0.5
2014-02-25	5	0.2	0.6	0.2	-99	-99	-99	0.4	0.5	0.4	-99	-99	-99	-99	0.2	0.3	-99	0.2	0.4	0.5	0.3	0.4	-99	0.5	0.6	0.5	0.6
2014-02-25	6	0.4	0.9	0.7	-99	-99	0.5	0.5	0.6	0.8	-99	-99	0.7	-99	0.5	0.4	-99	0.2	0.6	0.7	0.9	0.6	-99	0.6	0.7	0.7	0.8
2014-02-25	7	0.6	1.8	0.9	-99	-99	1.2	2.1	1	1.4	-99	-99	1.1	-99	1	0.5	-99	0.5	1.2	1.3	1.2	1.4	-99	0.9	1.4	1.2	1.1
2014-02-25	8	0.8	2.5	1.7	-99	-99	0.6	4	1.2	2.2	-99	-99	1.7	-99	2.7	0.8	-99	1.3	2.1	1.5	1.8	2.8	-99	1.3	2.4	2.4	2.2
2014-02-25	9	0.8	2.7	1.8	-99	-99	0.6	2.8	1.4	1.9	-99	-99	1.6	-99	1.9	1.1	-99	0.7	-99	2	1.5	2.6	-99	1.3	3.2	2.1	2.3
2014-02-25	10	0.3	1.5	1.5	-99	-99	0.5	1.9	1.5	1.8	-99	-99	1.6	-99	1.8	0.9	-99	0.9	1.1	1.7	0.7	1.4	-99	1	3.3	1.6	1.9
2014-02-25	11	0.3	1.1	0.9	-99	-99	1.2	1.3	1.2	-99	-99	-99	1.1	-99	1.6	-99	-99	1.1	0.6	1.4	0.6	1.2	-99	1.1	2.2	1	1.2
2014-02-25	12	0.2	1	0.5	-99	-99	1	0.9	0.8	-99	-99	-99	0.7	-99	0.5	-99	-99	0.9	0.5	1.3	0.5	1.1	-99	1.2	0.7	0.5	0.9
2014-02-25	13	0.2	0.7	0.6	-99	-99	0.8	0.7	0.6	-99	-99	-99	0.7	-99	0.3	-99	-99	0.5	0.3	0.7	0.5	0.8	-99	0.7	0.6	0.4	0.7
2014-02-25	14	0.2	0.5	0.7	-99	-99	0.7	0.6	0.5	-99	-99	-99	0.6	-99	0.2	-99	-99	0.5	0.3	0.7	0.4	0.7	-99	0.6	0.8	0.5	0.5
2014-02-25	15	0.1	0.5	0.5	-99	-99	0.7	0.7	0.5	-99	-99	-99	0.6	-99	0.2	0.5	-99	0.5	0.3	0.7	0.6	0.7	-99	0.6	0.8	0.4	0.5
2014-02-25	16	0.1	0.4	0.4	-99	-99	0.8	0.6	0.5	0.4	-99	-99	0.7	-99	0.2	0.5	-99	0.6	0.4	0.8	0.5	0.6	-99	0.5	0.7	0.3	0.5
2014-02-25	17	0.1	0.5	0.4	-99	-99	0.8	0.4	0.4	0.5	-99	-99	0.6	-99	0.3	0.5	-99	0.5	0.4	0.8	0.5	0.5	-99	0.5	0.8	0.3	0.5
2014-02-25	18	0.2	0.7	0.4	-99	-99	0.7	0.5	0.5	0.7	-99	-99	0.7	-99	0.4	0.6	-99	0.5	0.4	0.9	0.5	0.7	-99	0.6	1	0.4	0.4
2014-02-25	19	0.3	0.7	0.5	-99	-99	0.9	1	0.4	0.8	-99	-99	0.9	-99	0.4	0.6	-99	0.6	0.5	1.2	0.4	0.7	-99	0.7	0.8	0.7	0.5
2014-02-25	20	0.2	0.8	0.7	-99	-99	0.9	0.8	0.9	1	-99	-99	1	-99	0.6	0.8	-99	0.7	0.9	1.3	0.5	1.1	-99	0.8	0.8	0.7	0.9
2014-02-25	21	0.2	0.8	0.8	-99	-99	0.7	0.8	0.9	1.3	-99	-99	1.3	-99	0.7	0.5	-99	0.6	0.8	1.4	0.7	1.1	-99	0.8	1	0.6	0.6
2014-02-25	22	0.3	0.8	0.6	-99	-99	0.6	0.6	0.8	1	-99	-99	0.9	-99	0.4	0.5	-99	0.5	0.6	1.2	0.8	0.6	-99	0.9	0.9	0.7	0.8
2014-02-25	23	0.3	0.7	0.5	-99	-99	0.5	0.6	0.6	1	-99	-99	0.9	-99	0.4	0.4	-99	0.4	0.6	1.1	1.1	0.7	-99	0.8	0.9	0.7	0.8
2014-02-25	24	0.2	0.6	0.4	-99	-99	0.4	0.3	-99	0.6	-99	-99	0.8	-99	0.6	-99	-99	0.4	0.6	1.1	1.3	0.5	-99	1.3	1.2	0.6	0.5
2014-02-26	1	0.2	0.5	0.3	-99	-99	0.4	0.2	-99	0.5	-99	-99	0.6	-99	0.3	-99	-99	0.3	0.6	0.6	1.2	0.4	-99	1.2	0.7	0.5	0.3
2014-02-26	2	0.2	0.5	0.2	-99	-99	0.4	0.3	-99	0.4	-99	-99	0.6	-99	0.3	-99	-99	0.3	0.3	0.8	0.8	0.4	-99	1.1	0.7	0.4	0.4
2014-02-26	3	0.1	0.5	0.2	-99	-99	0.3	0.3	-99	0.3	-99	-99	0.4	-99	0.2	-99	-99	0.2	0.4	1.3	0.7	0.5	-99	0.9	0.9	0.5	0.6
2014-02-26	4	0.2	0.5	0.1	-99	-99	0.3	0	-99	0.4	-99	-99	0.4	-99	0.2	-99	-99	0.2	0.7	1	0.6	0.4	-99	0.8	0.8	0.6	0.6
2014-02-26	5	0.2	0.6	0.1	-99	-99	0.3	0.4	-99	1	-99	-99	0.6	-99	0.2	-99	-99	0.2	0.6	0.7	0.5	0.3	-99	0.8	0.7	0.7	0.6
2014-02-26	6	0.2	0.7	0.3	-99	-99	0.5	0.8	0.9	1.1	-99	-99	1.1	-99	0.7	0.2	-99	0.3	0.6	0.7	1.3	0.6	-99	0.8	1	0.9	1.5
2014-02-26	7	0.4	1.5	0.8	-99	-99	0.9	1.8	1.2	1.4	-99	-99	1.5	-99	1.1	0.5	-99	0.6	1.3	1.2	2	1.5	-99	1.2	1.9	1.5	2.2
2014-02-26	8	0.8	2.6	2	-99	-99	2.3	3.9	2.5	3.2	-99	-99	2.3	-99	1.4	0.8	-99	0.7	3.9	2.7	2.3	2.6	-99	2.6	3.2	2.6	3.4
2014-02-26	9	0.8	1.3	1.5	-99	-99	0.8	2.6	2.5	2	-99	-99	2.4	-99	1.9	0.8	-99	0.4	2.5	2.7	3.2	2.7	-99	2.7	2.6	2	3.6
2014-02-26	10	0.3	0.8	0.9	-99	-99	0.5	1.2	2.4	1.2	-99	-99	1.6	-99	0.8	1	-99	0.5	1.2	2.3	1.3	1	-99	1.6	1.1	1.3	1.8
2014-02-26	11	0.2	0.4	0.5	-99	-99	-99	1.2	1	1	-99	-99	1.3	-99	0.7	0.8	-99	0.3	0.9	1.4	0.4	0.6	-99	0.9	0.9	0.6	1.3
2014-02-26	12	0.1	0.5	0.3	-99	-99	-99	0.6	0.6	0.9	-99	-99	0.9	-99	0.2	0.9	-99	0.4	0.7	1.2	0.5	0.6	-99	0.7	0.6	0.4	1.1
2014-02-26	13	-99	0.4	0.4	-99	-99	-99	0.6	0.6	0.6	-99	-99	0.8	-99	0.2	0.5	-99	0.3	-99	1	0.5	0.6	-99	0.5	0.6	0.4	0.6
2014-02-26	14	0.1	0.5	0.5	-99	-99	-99	0.8	0.6	0.6	-99	-99	0.7	-99	0.2	0.5	-99	0.4	0.4	0.8	0.5	0.6	-99	0.5	0.7	-99	0.4
2014-02-26	15	0.1	0.5	0.4	-99	-99	0.6	0.6	0.5	0.5	-99	-99	0.6	-99	0.3	0.5	-99	0.5	0.4	0.8	0.5	0.6	-99	0.6	0.8	-99	0.5
2014-02-26	16	0.1	0.4	0.4	-99	-99	0.6	0.8	0.5	0.5	-99	-99	0.8	-99	0.3	0.5	-99	0.6	0.4	0.8	0.5	0.7	-99	0.6	0.8	-99	0.5
2014-02-26	17	0.2	0.5	0.4	-99	-99	0.7	0.8	0.6	0.7	-99	-99	0.6	-99	0.5	0.5	-99	0.6	0.4	0.8	0.4	0.7	-99	0.6	0.9	-99	0.5
2014-02-26	18	0.1	0.6	0.4	-99	-99	0.7	0.9	0.6	0.6	-99	-99	0.8	-99	0.6	0.3	-99	0.6	0.4	0.7	0.3	0.9	-99	0.5	0.8	0.2	0.8
2014-02-26	19	0.3	0.7	0.5	-99	-99	0.5	1	0.5	0.6	-99	-99	1.1	-99	0.5	0.3	-99	0.6	0.6	0.8	0.4	1.2	-99	0.5	0.7	0.5	0.8
2014-02-26	20	0.2	0.6	0.4	-99	-99	0.5	0.5	0.6	0.5	-99	-99	1.1	-99	0.5	0.4	-99	0.4	0.6	0.9	0.3	0.5	-99	0.5	0.8	0.6	0.7
2014-02-26	21	0.1	0.7	0.4	-99	-99	0.6	0.8	0.5	0.6	-99	-99	1	-99	0.8	0.3	-99	0.4	0.7	0.8	0.6	0.8	-99	0.6	0.8	0.4	0.8
2014-02-26	22	0.2	0.9	0.4	-99	-99	0.6	0.8	0.6	0.7	-99	-99	1.1	-99	1.1	0.5	-99	0.4	0.7	1.3	0.6	1	-99	0.8	0.9	0.4	1
2014-02-26	23	0.2	0.8	0.7	-99	-99	0.4	1.3	0.6	0.8	-99	-99	1.2	-99	1.6	0.6	-99	0.3	0.8	1.4	0.8	1	-99	1	1.5	0.3	1
2014-02-26	24	-99	0.7	0.3	-99	-99	0.4	0.5	0.6	0.6	-99	-99	0.7	-99	1.2	0.8	-99	0.3	0.8	0.8	0.7	0.5	-99	0.7	0.9	0.3	-99
2014-02-27	1	-99	0.8	0.4	-99	-99	0.3	0.6	0.4	0.3	-99	-99	0.6	-99	0.5	0.7	-99	0.3	0.4	1.2	0.6	0.4	-99	0.8	0.6	0.3	-99
2014-02-27	2	-99	0.5	0.4	-99	-99	0.3	0.4	0.4	0.3	-99	-99	0.5	-99	0.3	0.6	-99	0.2	0.5	0.6	0.6	0.4	-99	0.7	0.5	0.3	-99
2014-02-27	3	-99	0.7	0.4	-99	-99	0.4	0.5	0.4	0.4	-99	-99	0.6	-99	0.1	0.3	-99	0.2	0.5	0.7	0.5	0.4	-99	0.7	0.5	0.3	-99
2014-02-27	4	-99	0.8	0.4	-99	-99	0.4	0.4	0.5	0.5	-99	-99	0.8	-99	0.1	0.3	-99	0.2	0.5	0.8	0.5	0.4	-99	0.7	0.4	0.3	-99
2014-02-27	5	-99	0.5	0.4	-99	-99	0.3	0.4	0.5	0.3	-99	-99	0.5	-99	0.1	0.2	-99	0.3	0.3	1	0.6	0.5	-99	0.8	0.4	0.4	-99
2014-02-27	6	-99	0.9	0.4	-99	-99	0.3	0.6	0.5	0.6	-99	-99	0.8	-99	0.2	0.2	-99	0.3	0.5	0.9	0.8	0.7	-99	1.1	0.6	0.5	0.9
2014-02-27	7	-99	1.5	1.3	-99	-99	0.5	1.9	0.8	1.6	-99	-99	1.3	-99	0.6	0.5	-99	0.3	1	1.7	1.2	1.2	-99	1.5	1	1.4	1.7
2014-02-27	8	-99	2.8	1.9	-99	-99	0.6	4.1	1.8	2.3	-99	-99	1.8	-99	1.2	1.2	-99	0.7	1.6	2.3	0.7	2.2	-99	1.3	1.9	1.4	2
2014-02-27	9	-99	2.6	1.6	-99	-99	0.6	2.6	1.8	1.6	-99	-99	2	-99	1.5	1.1	-99	0.6	1.2	1.5	0.8	2.7	-99	1.3	1.5	1.3	1.9
2014-02-27	10	-99	2	1.1	-99	-99	0.4	2.2	1.8	1	-99	-99	1.5	-99	1.4	0.8	-99	0.7	0.8	1.1	0.6	1.8	-99	1.2	1.3	0.8	1.1
2014-02-27	11	-99	1.2	1	-99	-99	0.8	1.4	1	0.8	-99	-99	1	-99	0.7	-99	-99	1	0.6	0.8	0.3	1.8	-99	0.9	0.8	0.7	-99
2014-02-27	12	-99	0.9	0.6	-99	-99	0.6	0.8	0.7	0.6	-99	-99	0.8	-99	0.6	-99	-99	0.8	0.5	0.8	0.2	1.2	-99	0.7	0.8	0.6	0.8
2014-02-27	13	-99	0.4	0.5	-99	-99	0.3	0.4	0.6	0.6	-99	-99	0.9	-99	0.3	0.4	-99	0.3	-99	0.7	0.2	0.6	-99	0.5	0.8	0.8	0.8
2014-02-27	14	-99	0.4	-99	-99	-99	0.3	0.3	0.5	0.4	-99	-99	0.7	-99	0.1	0.2	-99	0.1	-99	0.7	0.2	0.3	-99	0.4	0.8	0.7	0.7
2014-02-27	15	-99	0.4	-99	-99	-99	0.3	0.3	0.2	0.4	-99	-99	0.7	-99	0.2	0.1	-99	0.1	-99	0.7	0.2	0.4	-99	0.4	0.8	0.4	0.4
2014-02-27	16	-99	0.4	0.2	-99	-99	0.3	0.3	0.2	0.4	-99	-99	0.8	-99	0.3	0.1	-99	0.1	0.2	0.5	0.2	0.3	-99	0.4	0.7	0.3	0.3
2014-02-27	17	-99	0.3	0.2	-99	-99	0.3	0.4	0.2	0.3	-99	-99	0.7	-99	0.3	0.1	-99	0.1	0.2	0.5	0.2	0.4	-99	0.4	0.5	0.3	0.3
2014-02-27	18	-99	0.3	0.2	-99	-99	0.3	0.3	0.2	0.3	-99	-99	0.7	-99	0.3	0.1	-99	0.2	0.3	0.5	0.2	0.3	-99	0.3	0.5	0.2	0.3
2014-02-27	19	-99	0.3	0.3	-99	-99	0.4	0.2	0.3	0.4	-99	-99	0.8	-99	0.4	0.2	-99	0.3	0.4	0.7	0.2	0.4	-99	0.4	0.5	0.2	0.5
2014-02-27	20	-99	0.4	0.4	-99	-99	0.5	0.5	0.4	0.8	-99	-99	1.2	-99	0.5	0.3	-99	0.3	0.5	0.8	0.2	0.6	-99	0.5	0.7	0.4	0.7
2014-02-27	21	-99	0.7	0.3	-99	-99	0.5	1.1	0.4	0.6	-99	-99	0.9	-99	0.8	0.3	-99	0.3	0.4	1	0.2	0.7	-99	0.7	0.8	0.5	0.7
2014-02-27	22	-99	0.8	0.6	-99	-99	0.4	0.4	0.5	0.5	-99	-99	0.8	-99	1.3	0.3	-99	0.3	0.6	1.2	0.4	0.6	-99	1	1	0.6	0.7
2014-02-27	23	-99	1	0.6	-99	-99	0.4	0.2	0.6	0.7	-99	-99	1.1	-99	0.7	0.3	-99	0.2	0.6	0.9	0.3	0.8	-99	0.8	0.9	0.5	0.6
2014-02-27	24	-99	1.2	0.7	-99	-99	0.4	0.6	0.8	1.1	-99	-99	1.1	-99	0.5	0.4	-99	0.3	1	0.9	0.3	0.9	-99	-99	0.9	0.5	1
2014-02-28	1	-99	0.8	0.8	-99	-99	0.2	0.8	0.7	1	-99	-99	1.1	-99	-99	0.3	-99	0.2	1.4	1.1	0.8	0.8	-99	-99	0.8	0.5	1.3
2014-02-28	2	-99	0.8	0.5	-99	-99	0.2	0.7	0.5	1	-99	-99	0.8	-99	-99	0.3	-99	0.1	0.9	1.5	0.5	0.8	-99	-99	0.9	0.4	1.1
2014-02-28	3	-99	0.5	0.5	-99	-99	0.3	0.5	0.4	0.9	-99	-99	0.8	-99	-99	0.2	-99	0.1	0.8	1.3	0.4	0.6	-99	-99	0.7	0.4	1
2014-02-28	4	-99	0.6	0.4	-99	-99	0.2	0.5	0.6	0.7	-99	-99	0.8	-99	-99	0.2	-99	0.1	0.7	0.9	0.5	0.4	-99	-99	0.6	0.3	0.8
2014-02-28	5	-99	0.6	0.4	-99	-99	0.2	0.5	0.7	0.8	-99	-99	1.1	-99	-99	0.2	-99	0.1	0.7	0.8	0.4	0.4	-99	-99	0.5	0.4	0.9
2014-02-28	6	-99	1.1	1.1	-99	-99	0.2	0.6	0.7	0.7	-99	-99	1.5	-99	-99	0.2	-99	0.1	1	0.9	0.9	0.6	-99	0.6	0.7	0.8	1
2014-02-28	7	-99	1.9	1.2	-99	-99	0.3	1.8	1.4	1.3	-99	-99	2.2	-99	-99	0.4	-99	0.2	1.4	1.2	1.2	1.4	-99	1	1.3	1	2.6
2014-02-28	8	-99	3.1	2.2	-99	-99	0.5	3.2	1.6	2.2	-99	-99	2.9	-99	1.8	0.6	-99	0.5	3.1	1.9	1.3	2.9	-99	1.2	2.3	1.8	3.1
2014-02-28	9	-99	1.9	2.5	-99	-99	0.3	2.1	1.5	2.3	-99	-99	2.7	-99	2.8	1.1	-99	0.4	-99	2.5	0.8	2.9	-99	1.2	2.1	1.5	2.7
2014-02-28	10	-99	1.7	-99	-99	-99	0.6	3.1	2.1	2.1	-99	-99	1.9	-99	1.5	1	-99	0.8	1.1	1.9	0.7	2.5	-99	1	1.8	1	1.4
2014-02-28	11	-99	-99	-99	-99	-99	0.8	2.4	1.6	1.7	-99	-99	1.4	-99	0.5	0.7	-99	0.8	0.9	1	0.5	1.6	-99	1	1.2	1.1	0.8
2014-02-28	12	-99	-99	-99	-99	-99	0.7	1	0.8	0.8	-99	-99	0.9	-99	0.4	0.4	-99	0.5	0.3	0.7	0.2	0.7	-99	0.5	0.7	0.6	0.5
2014-02-28	13	-99	-99	0.5	-99	-99	0.7	0.8	0.5	0.6	-99	-99	0.6	-99	0.3	0.4	-99	0.4	0.4	0.6	0.2	0.7	-99	0.5	0.7	0.3	0.5
2014-02-28	14	-99	0.6	0.6	-99	-99	0.7	1	0.5	0.5	-99	-99	0.7	-99	0.3	0.4	-99	0.5	0.4	0.6	0.2	0.7	-99	0.5	0.8	0.3	0.6
2014-02-28	15	-99	0.6	0.7	-99	-99	0.8	1	0.6	0.5	-99	-99	0.9	-99	0.3	0.4	-99	0.5	0.5	0.7	0.2	0.7	-99	0.5	1	0.3	0.6
2014-02-28	16	-99	0.6	0.8	-99	-99	0.8	1.1	0.6	0.6	-99	-99	0.8	-99	0.3	0.5	-99	0.6	0.4	0.6	0.2	0.7	-99	0.4	1.1	0.3	0.6
2014-02-28	17	-99	0.4	0.6	-99	-99	0.7	1	0.5	0.6	-99	-99	0.6	-99	0.3	0.3	-99	0.5	-99	0.7	0.2	0.7	-99	0.5	0.8	0.3	0.5
2014-02-28	18	-99	0.4	0.5	-99	-99	0.4	1	0.5	0.5	-99	-99	0.7	-99	-99	0.3	-99	0.3	0.4	0.7	0.2	0.7	-99	0.5	0.7	0.2	0.7
2014-02-28	19	-99	0.6	0.5	-99	-99	0.5	0.7	0.7	0.5	-99	-99	0.8	-99	-99	0.3	-99	0.4	0.6	0.8	0.3	0.7	-99	0.5	0.6	0.6	0.8
2014-02-28	20	-99	0.5	0.4	-99	-99	0.5	0.6	0.8	0.7	-99	-99	0.8	-99	-99	0.3	-99	0.4	0.7	0.9	0.3	0.7	-99	0.5	0.6	0.7	0.9
2014-02-28	21	-99	0.5	0.4	-99	-99	0.4	1.2	1	0.7	-99	-99	0.8	-99	-99	0.3	-99	0.3	0.7	0.7	0.2	0.9	-99	0.5	0.6	0.9	0.9
2014-02-28	22	-99	0.8	0.5	-99	-99	0.4	2.4	0.7	0.9	-99	-99	0.9	-99	-99	0.4	-99	0.3	0.9	0.8	0.5	0.8	-99	0.6	0.8	1.1	1.1
2014-02-28	23	-99	1.5	0.6	-99	-99	0.5	2.5	0.7	1.1	-99	-99	1.3	-99	-99	0.5	-99	0.4	1	1.4	0.7	1.1	-99	0.7	0.7	0.9	1
2014-02-28	24	-99	1.1	0.8	-99	-99	0.4	1.4	0.8	0.8	-99	-99	1.2	-99	-99	0.7	-99	0.4	1	1.7	0.7	1.1	-99	0.8	1	1	1.3
2014-03-01	1	-99	1	0.7	-99	-99	0.6	1	1.1	0.9	-99	-99	1.4	-99	-99	0.3	-99	0.4	1.5	1.4	0.9	1.4	-99	0.8	-99	0.7	1.7
2014-03-01	2	-99	0.9	0.6	-99	-99	-99	0.9	1.1	0.9	-99	-99	1.4	-99	-99	0.4	-99	0.3	1.5	1	0.8	1.1	-99	0.8	-99	0.6	1.4
2014-03-01	3	-99	0.8	0.5	-99	-99	-99	0.8	0.7	0.7	-99	-99	1.3	-99	-99	0.6	-99	0.2	1.6	0.9	0.5	0.9	-99	0.7	-99	0.6	1.4
2014-03-01	4	-99	0.8	0.6	-99	-99	0.6	0.7	0.6	0.5	-99	-99	1.2	-99	-99	0.2	-99	0.3	1.2	0.9	0.5	0.8	-99	0.8	-99	0.5	1.8
2014-03-01	5	-99	0.8	0.6	-99	-99	0.6	0.6	0.7	0.6	-99	-99	1	-99	-99	0.3	-99	0.3	1.3	1.5	0.4	0.6	-99	0.7	-99	0.6	2.1
2014-03-01	6	-99	0.9	0.6	-99	-99	0.7	0.8	1	0.8	-99	-99	1.3	-99	-99	0.3	-99	0.3	2.5	1.2	0.5	1	-99	0.7	-99	0.6	2
2014-03-01	7	-99	1.6	1	-99	-99	0.8	1.4	1	1.4	-99	-99	2.1	-99	-99	0.5	-99	0.5	1.4	1.1	0.6	1.2	-99	0.8	-99	0.9	3.8
2014-03-01	8	-99	1.7	1.4	-99	-99	1.5	1.5	1.3	1.7	-99	-99	3.3	-99	-99	1.1	-99	0.9	2.4	1.2	1.1	2.3	-99	1.4	-99	1	3.4
2014-03-01	9	-99	1.2	1.3	-99	-99	1.7	1.6	1.7	1.7	-99	-99	2.1	-99	-99	1.2	-99	0.7	1.7	1.4	1.5	2.1	-99	1.1	-99	1.4	2.8
2014-03-01	10	-99	1	1.4	-99	-99	1.1	1.8	1.9	1.8	-99	-99	1.9	-99	-99	0.8	-99	1	0.8	1.3	0.7	1.7	-99	0.7	-99	1.1	1.3
2014-03-01	11	-99	0.9	1.2	-99	-99	1	1.5	1.3	1.5	-99	-99	1.5	-99	-99	0.8	-99	0.9	0.7	1.4	0.7	1.6	-99	0.9	-99	0.9	0.9
2014-03-01	12	-99	0.6	1	-99	-99	0.9	0.9	0.9	1	-99	-99	1.2	-99	-99	0.6	-99	0.6	0.5	1.2	0.7	1.5	-99	1.3	-99	0.5	0.8
2014-03-01	13	-99	0.6	0.6	-99	-99	0.8	0.7	0.6	0.6	-99	-99	0.6	-99	-99	0.6	-99	0.6	0.4	1	0.3	0.9	-99	0.8	-99	0.5	0.6
2014-03-01	14	-99	0.6	0.5	-99	-99	0.7	0.7	0.4	0.7	-99	-99	0.7	-99	-99	0.5	-99	0.5	0.4	0.8	0.3	0.7	-99	0.8	-99	0.3	0.4
2014-03-01	15	-99	0.4	0.6	-99	-99	0.5	0.9	0.4	0.6	-99	-99	0.6	-99	-99	0.4	-99	0.4	0.3	0.9	0.2	0.6	-99	0.7	-99	0.3	0.5
2014-03-01	16	-99	-99	0.5	-99	-99	0.4	0.6	0.4	0.5	-99	-99	0.5	-99	-99	0.2	-99	0.4	0.2	0.5	0.2	0.3	-99	0.4	-99	0.2	0.3
2014-03-01	17	-99	0.5	0.5	-99	-99	0.5	0.5	0.4	0.5	-99	-99	0.6	-99	-99	0.2	-99	0.4	0.3	0.6	0.3	0.6	-99	0.5	-99	-99	0.4
2014-03-01	18	-99	0.2	0.4	-99	-99	0.5	0.2	0.4	0.5	-99	-99	0.9	-99	-99	0.3	-99	0.3	0.4	0.7	0.2	0.4	-99	0.5	-99	-99	0.6
2014-03-01	19	-99	1.5	0.4	-99	-99	0.4	0.1	0.2	0.4	-99	-99	-99	-99	-99	0.3	-99	0.4	0.3	0.7	0.3	0.4	-99	0.5	-99	0.6	0.9
2014-03-01	20	-99	0.2	0.7	-99	-99	0.5	1	0.5	0.9	-99	-99	-99	-99	-99	0.4	-99	0.4	0.6	0.7	0.5	0.6	-99	0.6	-99	0.5	0.7
2014-03-01	21	-99	0.5	0.8	-99	-99	0.5	1.3	0.6	1	-99	-99	-99	-99	-99	0.6	-99	0.6	0.4	1.5	0.8	0.9	-99	0.8	-99	0.5	0.7
2014-03-01	22	-99	0.5	0.9	-99	-99	0.9	1	0.8	0.8	-99	-99	-99	-99	-99	0.6	-99	0.7	0.6	1.4	1.3	1	-99	0.9	-99	0.8	0.4
2014-03-01	23	-99	0.4	1	-99	-99	1.1	1.3	0.9	1.2	-99	-99	-99	-99	-99	0.5	-99	0.7	1	2.2	1.2	0.9	-99	1.3	-99	1.6	1.2
2014-03-01	24	-99	0.7	0.8	-99	-99	1.1	1.3	1.2	1.7	-99	-99	-99	-99	-99	0.4	-99	-99	1.2	1.9	1.5	1	-99	1.3	-99	1.6	1.8
2014-03-02	1	-99	0.7	0.7	-99	-99	0.9	0.9	1.7	0.9	-99	-99	-99	-99	-99	0.4	-99	-99	1.8	1.5	1	1.1	-99	1.1	-99	1.3	2
2014-03-02	2	-99	0.5	0.7	-99	-99	0.6	1.1	1.2	1	-99	-99	-99	-99	-99	0.6	-99	-99	1.5	1.1	0.6	1.1	-99	1.1	-99	1.1	1.3
2014-03-02	3	-99	0.5	0.9	-99	-99	0.5	0.9	1.4	1.4	-99	-99	-99	-99	-99	0.7	-99	-99	1.4	1.3	0.6	1	-99	1	-99	1.2	1.1
2014-03-02	4	-99	0.5	0.8	-99	-99	0.4	0.8	1.4	1.1	-99	-99	-99	-99	-99	0.8	-99	-99	1.5	1	0.4	0.7	-99	0.8	-99	1.3	1.4
2014-03-02	5	-99	0.5	0.8	-99	-99	0.4	0.6	0.8	0.8	-99	-99	-99	-99	-99	0.6	-99	-99	1.9	1	0.4	0.7	-99	0.7	-99	1.4	1.9
2014-03-02	6	-99	0.7	1	-99	-99	0.3	0.5	0.6	0.6	-99	-99	-99	-99	-99	0.6	-99	-99	2	1.3	0.4	0.9	-99	0.7	-99	1.3	2.7
2014-03-02	7	-99	1	1	-99	-99	0.3	0.8	0.7	1.1	-99	-99	-99	-99	-99	0.4	-99	-99	2	1.7	0.8	0.9	-99	0.8	-99	1.3	2.7
2014-03-02	8	-99	1.4	1.5	-99	-99	0.5	1.7	0.9	1.1	-99	-99	-99	-99	-99	0.7	-99	-99	2.8	1.8	-99	1.1	-99	1.2	-99	1.8	2.5
2014-03-02	9	-99	0.9	1.2	-99	-99	0.5	1.3	1	0.9	-99	-99	-99	-99	-99	-99	-99	-99	2.3	1.6	0.6	1	-99	1.3	-99	1.4	2.3
2014-03-02	10	-99	0.8	1.2	-99	-99	0.4	0.9	0.9	1	-99	-99	-99	-99	-99	-99	-99	-99	1.6	1	0.7	1.5	-99	0.9	-99	1.2	1.8
2014-03-02	11	-99	0.7	0.8	-99	-99	0.7	0.9	1.1	0.9	-99	-99	-99	-99	-99	0.4	-99	-99	0.8	1	0.3	1	-99	0.9	-99	0.8	1
2014-03-02	12	-99	0.4	0.4	-99	-99	0.6	0.6	0.6	0.7	-99	-99	-99	-99	-99	0.4	-99	-99	0.3	0.7	0.2	0.8	-99	0.6	-99	0.4	0.6
2014-03-02	13	-99	0.1	0.3	-99	-99	0.5	0.5	0.3	0.4	-99	-99	-99	-99	-99	0.3	-99	-99	0.2	0.8	0.2	0.5	-99	0.5	-99	0.3	0.3
2014-03-02	14	-99	0.2	0.4	-99	-99	0.6	0.5	0.3	0.4	-99	-99	-99	-99	-99	0.2	-99	-99	0.3	0.6	0.2	0.4	-99	0.5	-99	0.3	0.3
2014-03-02	15	-99	0.3	0.5	-99	-99	0.5	0.6	0.3	0.5	-99	-99	-99	-99	-99	0.2	-99	-99	0.3	0.6	0.3	0.4	-99	0.6	-99	0.3	0.4
2014-03-02	16	-99	0.4	0.5	-99	-99	0.5	0.6	0.3	0.4	-99	-99	-99	-99	-99	0.1	-99	-99	0.4	0.7	0.3	0.5	-99	0.6	-99	0.3	0.4
2014-03-02	17	-99	0.4	0.4	-99	-99	0.5	0.5	0.3	0.4	-99	-99	-99	-99	-99	0.3	-99	-99	0.4	0.7	0.3	0.4	-99	0.6	-99	0.4	0.4
2014-03-02	18	-99	0.3	0.4	-99	-99	0.6	0.5	0.4	0.5	-99	-99	-99	-99	-99	0.2	-99	-99	0.5	0.7	0.3	0.6	-99	0.6	-99	0.4	0.6
2014-03-02	19	-99	0.2	0.4	-99	-99	0.5	0.4	0.3	0.4	-99	-99	-99	-99	-99	0.2	-99	-99	0.4	0.8	0.2	0.3	-99	0.6	-99	0.5	0.7
2014-03-02	20	-99	0.2	0.5	-99	-99	0.7	0.5	0.5	0.6	-99	-99	-99	-99	-99	0.3	-99	-99	0.6	0.9	0.6	0.5	-99	0.7	-99	0.4	0.6
2014-03-02	21	-99	0.2	0.7	-99	-99	0.8	1.2	0.7	0.8	-99	-99	-99	-99	-99	0.4	-99	-99	0.8	1.4	0.6	0.8	-99	1.4	-99	0.5	0.6
2014-03-02	22	-99	0.6	0.5	-99	-99	0.5	1.8	0.7	0.9	-99	-99	-99	-99	-99	0.6	-99	-99	0.7	2	0.9	0.7	-99	1.5	-99	0.7	0.5
2014-03-02	23	-99	0.4	0.7	-99	-99	0.5	1.8	0.8	1.2	-99	-99	-99	-99	-99	0.5	-99	-99	0.8	2.4	0.8	0.7	-99	1.7	-99	0.8	0.6
2014-03-02	24	-99	0.1	1	-99	-99	0.5	1	0.9	2.2	-99	-99	-99	-99	-99	0.3	-99	-99	0.7	1.7	1.2	-99	-99	1.5	-99	1.6	0.8
2014-03-03	1	-99	0.2	0.5	-99	-99	0.7	0.6	0.8	1.6	-99	-99	-99	-99	-99	0.2	-99	-99	0.9	1.9	1.4	-99	-99	1.4	-99	0.7	0.8
2014-03-03	2	-99	0.2	0.3	-99	-99	0.6	0.5	0.9	0.6	-99	-99	-99	-99	-99	0.2	-99	-99	0.5	1.2	1.4	-99	-99	1.1	-99	0.5	0.6
2014-03-03	3	-99	0.2	0.2	-99	-99	0.4	0.4	0.7	0.4	-99	-99	-99	-99	-99	0.2	-99	-99	0.5	0.9	0.9	-99	-99	0.9	-99	0.4	0.6
2014-03-03	4	-99	0.2	0.3	-99	-99	0.4	0.5	0.6	0.6	-99	-99	-99	-99	-99	0.2	-99	-99	0.8	0.9	0.5	-99	-99	0.8	-99	0.5	0.5
2014-03-03	5	-99	0.2	0.4	-99	-99	0.5	0.6	0.6	0.7	-99	-99	-99	-99	-99	0.4	-99	-99	0.9	0.8	0.7	-99	-99	0.7	-99	0.5	0.9
2014-03-03	6	-99	0.6	0.7	-99	-99	0.6	0.7	0.6	0.8	-99	-99	-99	-99	-99	0.4	-99	-99	2	1.1	0.9	0.6	-99	0.9	-99	1	1.3
2014-03-03	7	-99	1.8	1.2	-99	-99	1.3	1.8	1	1.5	-99	-99	-99	-99	-99	0.5	-99	-99	3.6	2.3	1	1.4	-99	1.7	-99	1.4	2
2014-03-03	8	-99	2	1.9	-99	-99	1.2	3.8	1.6	2.8	-99	-99	-99	-99	-99	1.4	-99	1.2	4.2	3.4	1.8	3.5	-99	2.1	-99	2.4	3.6
2014-03-03	9	-99	1.8	1.7	-99	-99	0.6	2.3	2.4	2.7	-99	-99	-99	-99	-99	2.2	-99	1.3	1.7	3.4	1.4	3.3	-99	1.7	-99	2.6	3.3
2014-03-03	10	-99	1.6	1.2	-99	-99	0.6	2.1	2.9	2.2	-99	-99	-99	-99	-99	1.3	-99	1.2	1.2	1.7	1.1	2	-99	1	-99	2.1	2.9
2014-03-03	11	-99	0.6	0.8	-99	-99	0.5	-99	2	1.6	-99	-99	-99	-99	-99	1.1	-99	0.5	1.1	1.2	0.6	1.6	-99	0.7	-99	0.8	2.5
2014-03-03	12	-99	0.3	0.7	-99	-99	0.6	-99	1.1	1.2	-99	-99	-99	-99	-99	0.6	-99	0.4	0.9	1.4	0.3	0.7	-99	0.9	-99	0.3	1
2014-03-03	13	-99	0.3	0.9	-99	-99	0.6	-99	0.6	0.5	-99	-99	-99	-99	-99	0.6	-99	0.4	0.4	1.3	0.6	0.9	-99	1.1	-99	0.2	0.5
2014-03-03	14	-99	0.3	0.6	-99	-99	0.8	-99	0.4	0.4	-99	-99	-99	-99	-99	0.5	-99	-99	0.3	0.8	-99	0.9	-99	0.7	-99	0.2	0.5
2014-03-03	15	-99	0.2	0.5	-99	-99	0.7	-99	0.5	0.5	-99	-99	-99	-99	-99	0.4	-99	0.6	0.3	0.8	0.5	0.6	-99	0.7	-99	0.2	0.5
2014-03-03	16	-99	0.3	0.5	-99	-99	1.1	-99	0.6	0.6	-99	-99	-99	-99	-99	0.6	-99	0.8	0.4	0.9	0.3	0.7	-99	0.7	-99	0.2	0.6
2014-03-03	17	-99	0.5	0.6	-99	-99	1	1.1	0.6	0.7	-99	-99	-99	-99	-99	0.7	-99	0.8	0.3	1.1	0.3	0.8	-99	0.7	-99	0.3	0.5
2014-03-03	18	-99	0.3	0.4	-99	-99	0.8	1	0.5	0.7	-99	-99	-99	-99	-99	0.5	-99	0.9	0.3	1	0.2	0.7	-99	0.5	-99	0.3	0.6
2014-03-03	19	-99	0.3	0.6	-99	-99	0.7	1	0.6	0.8	-99	-99	-99	-99	-99	0.5	-99	0.6	0.4	0.9	0.3	0.9	-99	0.5	-99	0.3	0.7
2014-03-03	20	-99	0.2	0.4	-99	-99	0.6	0.5	0.5	0.6	-99	-99	-99	-99	-99	0.4	-99	0.4	0.5	1	0.4	0.6	-99	0.7	-99	0.3	0.4
2014-03-03	21	-99	0.2	0.4	-99	-99	0.5	0.5	0.5	0.4	-99	-99	-99	-99	-99	0.2	-99	0.3	0.4	0.8	0.6	0.4	-99	0.7	-99	0.2	0.3
2014-03-03	22	-99	0.3	0.4	-99	-99	0.5	0.6	0.4	0.5	-99	-99	-99	-99	-99	0.2	-99	0.3	0.3	0.7	0.5	0.6	-99	0.7	-99	0.3	0.3
2014-03-03	23	-99	0.4	0.4	-99	-99	0.5	0.5	0.4	0.3	-99	-99	-99	-99	-99	0.2	-99	0.3	0.4	0.7	0.5	0.4	-99	0.6	-99	0.3	0.6
2014-03-03	24	-99	0.4	0.3	-99	-99	-99	0.4	0.4	0.4	-99	-99	-99	-99	-99	0.2	-99	0.3	0.4	0.7	0.4	0.4	-99	0.7	-99	0.4	0.7
2014-03-04	1	-99	0.2	0.3	-99	-99	-99	0.4	0.3	0.2	-99	-99	-99	-99	-99	0.2	-99	0.4	0.3	0.6	0.5	0.3	-99	0.8	-99	0.2	0.4
2014-03-04	2	-99	0.2	0.3	-99	-99	-99	0.5	0.3	0.3	-99	-99	-99	-99	-99	0.2	-99	0.3	0.4	0.6	0.3	0.4	-99	0.7	-99	0.2	0.3
2014-03-04	3	-99	0.2	0.2	-99	-99	-99	0.5	0.4	0.4	-99	-99	-99	-99	-99	0.3	-99	0.3	0.4	0.7	0.4	0.4	-99	0.7	-99	0.3	0.3
2014-03-04	4	-99	0.2	0.4	-99	-99	-99	0.6	0.5	0.5	-99	-99	-99	-99	-99	0.3	-99	0.4	0.3	0.6	0.4	0.3	-99	0.6	-99	0.3	0.4
2014-03-04	5	-99	0.3	0.5	-99	-99	-99	0.6	0.7	0.3	-99	-99	-99	-99	-99	0.3	-99	0.4	0.4	0.4	0.5	0.4	-99	0.6	-99	0.4	0.6
2014-03-04	6	-99	0.5	0.8	-99	-99	0.4	0.7	0.5	0.7	-99	-99	1.4	-99	-99	0.4	-99	0.4	0.9	0.8	0.5	0.7	-99	0.8	-99	0.6	1.1
2014-03-04	7	-99	1.6	1.2	-99	-99	0.3	1.9	0.9	1.3	-99	-99	1.7	-99	-99	0.7	-99	0.6	1.3	1.8	0.8	2.2	-99	0.9	-99	1.2	2.4
2014-03-04	8	-99	2.6	2	-99	-99	1	3.6	1.3	2.3	-99	-99	2.4	-99	-99	1.4	-99	0.7	3.1	2.9	1.2	2.9	-99	1	-99	1.6	3.3
2014-03-04	9	-99	2.1	1.5	-99	-99	0.6	2.7	1.1	1.9	-99	-99	2.1	-99	-99	1.1	-99	0.7	1.8	2.1	1.1	1.5	-99	1	-99	2	1.7
2014-03-04	10	-99	0.9	1.1	-99	-99	0.3	0.9	1.5	0.7	-99	-99	1.2	-99	-99	0.9	-99	0.2	1	1.1	0.4	0.8	-99	0.7	-99	1.9	1.4
2014-03-04	11	-99	0.3	0.8	-99	-99	0.3	0.4	0.9	0.5	-99	-99	0.9	-99	-99	0.6	-99	-99	0.7	0.7	0.1	0.6	-99	0.5	-99	0.7	1.1
2014-03-04	12	-99	0.1	0.7	-99	-99	0.3	0.3	0.6	0.4	-99	-99	0.5	-99	-99	0.3	-99	0.5	0.5	0.6	0.2	0.4	-99	0.4	-99	0.4	0.8
2014-03-04	13	-99	0.2	0.5	-99	-99	0.3	0.5	0.4	0.3	-99	-99	0.4	-99	-99	0.3	-99	-99	0.3	0.6	0.3	0.3	-99	0.4	-99	0.3	0.6
2014-03-04	14	-99	0.1	0.4	-99	-99	0.3	0.4	0.4	0.4	-99	-99	0.5	-99	-99	0.2	-99	0.2	0.3	0.6	0.2	0.5	-99	0.4	-99	0.3	0.5
2014-03-04	15	-99	0.1	0.3	-99	-99	0.3	0.4	0.3	0.4	-99	-99	0.5	-99	-99	0.1	-99	0.2	0.3	0.6	0.2	0.4	-99	0.4	-99	0.3	0.5
2014-03-04	16	-99	0	0.2	-99	-99	0.3	0.4	0.2	0.3	-99	-99	0.6	-99	-99	0.1	-99	0.2	0.3	0.5	0.2	0.3	-99	0.4	-99	0.4	0.5
2014-03-04	17	-99	0.1	0.3	-99	-99	0.3	0.4	0.3	0.3	-99	-99	0.8	-99	-99	0.1	-99	0.2	0.3	0.5	0.2	0.4	-99	0.4	-99	0.3	0.5
2014-03-04	18	-99	0	0.3	-99	-99	0.4	0.5	0.3	0.3	-99	-99	0.7	-99	-99	0.2	-99	0.3	0.3	0.6	0.2	0.4	-99	0.4	-99	0.3	0.4
2014-03-04	19	-99	0	0.3	-99	-99	0.5	0.7	0.4	-99	-99	-99	1	-99	-99	0.3	-99	0.3	0.5	0.7	0.2	0.6	-99	0.5	-99	0.5	0.6
2014-03-04	20	-99	0.1	0.5	-99	-99	0.4	1.2	0.6	1	-99	-99	0.9	-99	-99	0.6	-99	0.4	0.8	1.1	0.4	1.2	-99	0.6	-99	1	0.8
2014-03-04	21	-99	0.4	0.4	-99	-99	0.4	1.5	0.5	1	-99	-99	1.1	-99	-99	1	-99	0.4	0.7	0.7	0.4	1	-99	0.6	-99	1.5	0.8
2014-03-04	22	-99	0.5	0.3	-99	-99	0.3	1.2	0.4	0.7	-99	-99	0.8	-99	-99	0.8	-99	0.2	0.6	1.5	0.3	0.8	-99	0.7	-99	1.9	0.5
2014-03-04	23	-99	0.2	0.3	-99	-99	0.2	1.3	0.5	1	-99	-99	1	-99	-99	0.5	-99	0.3	0.7	1.5	0.5	0.9	-99	0.8	-99	2.4	0.6
2014-03-04	24	-99	0.7	0.3	-99	-99	0.2	1.1	-99	0.7	-99	-99	0.8	-99	-99	-99	-99	0.2	1.4	1.3	0.5	0.7	-99	0.5	-99	1.9	1.1
2014-03-05	1	-99	0.6	0.3	-99	-99	0.2	0.7	-99	0.3	-99	-99	0.7	-99	0.3	-99	-99	0.2	0.7	1.2	0.4	0.5	-99	0.6	-99	1.1	0.7
2014-03-05	2	-99	0.6	0.4	-99	-99	0.1	0.6	-99	0.2	-99	-99	0.4	-99	0.2	-99	-99	0.2	0.3	0.8	0.3	0.5	-99	0.5	-99	1.1	0.4
2014-03-05	3	-99	0.3	0.5	-99	-99	0.1	0.5	-99	0.2	-99	-99	0.4	-99	0.1	-99	-99	0.2	0.4	0.9	0.2	0.7	-99	0.8	-99	1.2	0.4
2014-03-05	4	-99	0.3	0.4	-99	-99	0.1	0.5	-99	0.3	-99	-99	0.4	-99	0.1	-99	-99	0.2	0.4	1.1	0.2	0.6	-99	0.5	-99	0.9	0.4
2014-03-05	5	-99	0.4	0.7	-99	-99	0.1	0.6	-99	0.5	-99	-99	0.4	-99	0.2	-99	-99	0.2	0.3	0.8	0.3	0.7	-99	0.5	-99	1.1	0.5
2014-03-05	6	-99	0.8	0.9	-99	-99	0.2	1	0.2	0.8	-99	-99	0.9	-99	0.5	0.3	-99	0.2	0.6	0.7	0.5	1.1	-99	0.7	-99	1.4	1.8
2014-03-05	7	-99	1.7	1.4	-99	-99	0.2	2.2	0.6	1.6	-99	-99	1.3	-99	1.8	0.7	-99	0.2	1.5	2	0.6	1.7	-99	1	-99	1.6	2.7
2014-03-05	8	-99	2	2.7	-99	-99	0.4	4.3	1.9	2.3	-99	-99	2.3	-99	2.4	1.3	-99	0.4	2.7	3.7	1.1	3	-99	1.7	-99	3	4.3
2014-03-05	9	-99	1.5	1.8	-99	-99	0.3	2.7	1.5	2	-99	-99	1.4	-99	2.8	0.5	-99	0.4	1.6	2.3	1.3	1.9	-99	1.1	-99	3.4	1.8
2014-03-05	10	-99	1	0.9	-99	-99	0.4	1.5	0.9	0.9	-99	-99	0.9	-99	0.8	0.7	-99	0.4	0.8	1.2	0.5	1.1	-99	0.8	-99	1.7	0.8
2014-03-05	11	-99	0.4	0.7	-99	-99	0.4	1	0.5	0.5	-99	-99	0.7	-99	0.3	0.6	-99	0.6	0.5	0.8	0.2	0.7	-99	0.5	-99	0.6	0.8
2014-03-05	12	-99	0.3	0.4	-99	-99	0.3	0.4	0.4	0.3	-99	-99	0.5	-99	0.2	0.5	-99	0.5	0.2	0.6	0.2	0.6	-99	0.4	-99	0.4	0.4
2014-03-05	13	-99	0	0.4	-99	-99	0.2	0.3	0.3	0.3	-99	-99	0.7	-99	0.2	0.4	-99	0.2	0.3	0.7	0.2	0.3	-99	0.4	-99	0.3	0.5
2014-03-05	14	-99	0	0.2	-99	-99	0.2	0.3	0.1	0.3	-99	-99	0.5	-99	0.3	0.3	-99	0.1	0.3	0.5	0.2	0.3	-99	0.4	-99	0.2	0.4
2014-03-05	15	-99	0.2	0.3	-99	-99	0.3	0.3	0.1	0.3	-99	-99	0.4	-99	0.3	0.2	-99	0.2	0.2	0.5	0.2	0.4	-99	0.4	-99	0.1	0.3
2014-03-05	16	-99	0.1	0.3	-99	-99	0.2	0.4	0.1	0.3	-99	-99	0.5	-99	0.3	0.2	-99	0.2	0.2	0.5	0.2	0.3	-99	0.4	-99	0.2	-99
2014-03-05	17	-99	0.1	0.3	-99	-99	0.2	0.4	0.1	0.3	-99	-99	0.7	-99	0.2	0.2	-99	0.2	0.2	0.5	0.2	0.4	-99	0.4	-99	0.3	0.3
2014-03-05	18	-99	0.1	0.3	-99	-99	0.3	0.4	0.1	0.3	-99	-99	0.6	-99	0.3	0.1	-99	0.2	0.3	0.4	0.2	0.5	-99	0.4	-99	0.4	0.3
2014-03-05	19	-99	0.1	0.3	-99	-99	0.3	0.5	0.2	0.4	-99	-99	0.5	-99	0.4	0.2	-99	0.3	0.4	0.5	0.2	0.4	-99	0.4	-99	0.3	0.5
2014-03-05	20	-99	0.2	0.3	-99	-99	0.3	0.9	0.3	0.6	-99	-99	0.7	-99	0.4	0.2	-99	0.3	0.5	0.6	0.2	0.8	-99	0.5	-99	0.3	0.6
2014-03-05	21	-99	0.3	0.3	-99	-99	0.3	0.9	0.2	0.5	-99	-99	0.5	-99	0.5	0.3	-99	0.2	0.4	0.8	0.4	0.8	-99	0.5	-99	0.4	0.4
2014-03-05	22	-99	0.3	0.3	-99	-99	0.2	1.6	0.2	0.3	-99	-99	0.6	-99	0.7	0.3	-99	0.2	0.3	1	0.4	0.5	-99	0.7	-99	0.5	0.3
2014-03-05	23	-99	0.4	0.5	-99	-99	0.2	1.7	0.3	0.3	-99	-99	0.6	-99	0.9	0.3	-99	0.2	0.4	1.1	0.8	0.7	-99	0.6	-99	0.9	1.3
2014-03-05	24	-99	0.3	0.4	-99	-99	0.2	1.1	0.2	0.3	-99	-99	0.6	-99	1	0.4	-99	0.1	0.5	1.7	0.6	0.6	-99	1	-99	1.1	-99
2014-03-06	1	-99	0.3	0.4	-99	-99	0.1	0.7	0.2	0.6	-99	-99	0.6	-99	0.8	0.4	-99	0.1	0.5	1.4	0.6	0.8	-99	0.7	-99	0.5	-99
2014-03-06	2	-99	0.2	0.3	-99	-99	0.1	0.6	0.4	0.7	-99	-99	0.9	-99	0.8	0.3	-99	0.1	0.7	0.9	0.6	0.9	-99	0.6	-99	0.7	-99
2014-03-06	3	-99	0.2	0.4	-99	-99	0.1	0.4	0.4	0.5	-99	-99	0.8	-99	1	0.2	-99	0.1	0.9	0.8	0.6	0.5	-99	0.5	-99	0.6	-99
2014-03-06	4	-99	0.2	0.3	-99	-99	0.1	0.4	0.8	0.5	-99	-99	0.7	-99	0.6	0.2	-99	0	0.7	0.8	0.4	0.4	-99	0.5	-99	0.6	-99
2014-03-06	5	-99	0.2	0.3	-99	-99	0.1	0.4	0.7	0.4	-99	-99	0.8	-99	0.7	0.2	-99	0.1	0.8	0.6	0.3	0.4	-99	0.6	-99	0.7	-99
2014-03-06	6	-99	0.6	0.7	-99	-99	0.2	0.6	0.5	0.6	-99	-99	0.8	-99	0.9	0.1	-99	0.2	1	0.7	0.6	0.6	-99	0.7	-99	0.7	1.7
2014-03-06	7	-99	1.8	2.3	-99	-99	0.8	2	0.6	1.6	-99	-99	1.8	-99	1.8	0.6	-99	0.5	1.8	1.2	0.9	1.7	-99	0.9	-99	1.1	1.6
2014-03-06	8	-99	2.5	2.8	-99	-99	1.6	3.3	0.9	1.7	-99	-99	3.2	-99	3.3	0.9	-99	0.9	2.7	1.8	1.6	2.8	-99	1.3	-99	1.8	3.2
2014-03-06	9	-99	1	1.9	-99	-99	0.8	1.8	1.6	1.4	-99	-99	3	-99	1.7	1.3	-99	1	2.1	2.2	1.7	2.6	-99	1.2	-99	2.2	3.1
2014-03-06	10	-99	0.5	1.5	-99	-99	0.5	1.1	1.6	1.8	-99	-99	2	-99	1.6	1.2	-99	0.4	1.1	1.8	1.4	1.4	-99	1.4	-99	1.5	1.8
2014-03-06	11	-99	0.3	0.7	-99	-99	0.4	0.8	0.7	1.2	-99	-99	1.1	-99	0.7	0.6	-99	0.4	0.7	1	0.6	0.9	-99	0.8	-99	0.4	1.2
2014-03-06	12	-99	0.3	0.9	-99	-99	0.5	0.8	0.6	0.8	-99	-99	0.7	-99	0.3	0.6	-99	0.4	0.6	1.1	0.7	0.8	-99	1	-99	0.1	0.6
2014-03-06	13	-99	0.2	0.8	-99	-99	0.5	0.8	0.6	0.5	-99	-99	0.6	-99	0.3	0.6	-99	0.5	0.3	1.2	0.4	0.7	-99	0.7	-99	0.2	0.5
2014-03-06	14	-99	0.3	0.6	-99	-99	0.7	0.8	0.5	0.6	-99	-99	0.6	-99	0.3	0.6	-99	0.6	0.3	0.9	0.3	0.6	-99	0.6	-99	0.2	0.5
2014-03-06	15	-99	0.4	0.7	-99	-99	0.7	0.9	0.5	0.5	-99	-99	0.7	-99	0.3	0.5	-99	0.6	0.4	0.7	0.4	0.8	-99	0.6	-99	0.2	0.6
2014-03-06	16	-99	0.4	0.7	-99	-99	0.7	1	0.4	0.5	-99	-99	0.8	-99	0.4	0.4	-99	0.6	0.5	0.7	0.3	0.8	-99	0.6	-99	0.3	0.7
2014-03-06	17	-99	0.5	0.6	-99	-99	0.5	1	0.4	0.5	-99	-99	0.6	-99	0.5	0.2	-99	0.4	0.4	0.6	0.2	0.9	-99	0.5	-99	0.2	0.7
2014-03-06	18	-99	0.4	0.5	-99	-99	0.4	0.8	0.4	0.5	-99	-99	0.8	-99	0.5	0.2	-99	0.3	0.5	0.6	0.2	1	-99	0.5	-99	0.2	0.8
2014-03-06	19	-99	0.3	0.5	-99	-99	0.4	0.5	0.4	0.4	-99	-99	1.1	-99	0.6	0.2	-99	0.3	0.4	0.7	0.2	0.6	-99	0.5	-99	0.3	0.4
2014-03-06	20	-99	0.3	0.5	-99	-99	0.4	0.5	0.4	0.5	-99	-99	0.7	-99	0.5	0.4	-99	0.3	0.4	0.8	0.3	0.7	-99	0.6	-99	0.3	0.6
2014-03-06	21	-99	0.5	0.6	-99	-99	0.4	0.7	0.5	0.7	-99	-99	0.6	-99	0.6	0.3	-99	0.3	0.5	0.8	0.6	0.6	-99	0.7	-99	0.5	0.6
2014-03-06	22	-99	0.7	0.6	-99	-99	0.5	1.7	0.5	0.8	-99	-99	0.7	-99	0.6	0.5	-99	0.5	0.8	0.8	0.5	1	-99	0.8	-99	0.6	0.8
2014-03-06	23	-99	0.5	0.9	-99	-99	0.8	1.9	0.8	1	-99	-99	1.3	-99	1.2	0.8	-99	0.7	1.2	1.1	0.8	0.9	-99	1.3	-99	0.4	1.2
2014-03-06	24	-99	0.7	0.7	-99	-99	0.9	1	0.7	1.2	-99	-99	1.2	-99	0.8	0.7	-99	0.6	1.2	1.6	0.9	0.8	-99	-99	-99	0.3	1.2
2014-03-07	1	-99	0.7	0.6	-99	-99	0.4	0.9	0.7	0.7	-99	-99	0.9	-99	0.5	0.5	-99	0.4	0.5	1.3	0.8	0.8	-99	-99	-99	0.3	0.8
2014-03-07	2	-99	0.5	0.6	-99	-99	0.4	0.7	0.7	0.5	-99	-99	0.8	-99	0.4	0.4	-99	0.4	0.4	0.4	0.2	0.8	-99	-99	-99	0.3	0.9
2014-03-07	3	-99	0.5	0.7	-99	-99	0.2	0.6	0.2	0.2	-99	-99	0.5	-99	0.4	0.5	-99	0.4	0.7	0.3	0.7	0.6	-99	-99	-99	0.3	1
2014-03-07	4	-99	0.5	0.6	-99	-99	0.2	0.7	0.2	0.1	-99	-99	0.3	-99	0.5	0.4	-99	0.2	0.9	0.3	0.4	0.6	-99	-99	-99	0.3	1.1
2014-03-07	5	-99	0.4	0.8	-99	-99	0.2	0.6	0.2	0.3	-99	-99	0.6	-99	0.3	0.3	-99	0.2	0.8	0.5	0.2	0.6	-99	-99	-99	0.3	1.5
2014-03-07	6	-99	0.8	0.9	-99	-99	0.2	0.9	0.5	0.6	-99	-99	0.9	-99	0.4	0.3	-99	0.3	1.1	0.9	0.4	0.8	-99	0.6	-99	0.5	2.2
2014-03-07	7	-99	1.8	1.3	-99	-99	0.4	2	0.9	1.4	-99	-99	1.6	-99	0.7	0.5	-99	0.3	1.8	1.8	0.8	1.8	-99	1.2	-99	1.1	3.2
2014-03-07	8	-99	1.4	2.2	-99	-99	0.7	3.6	1.5	1.6	-99	-99	2.5	-99	2.4	1.2	-99	0.5	2.4	2.8	1.7	2.4	-99	1.4	-99	2	3.6
2014-03-07	9	-99	1.1	1.8	-99	-99	0.4	2	2	1.4	-99	-99	2.4	-99	1.8	0.8	-99	0.5	3	2.1	1.1	2.2	-99	0.9	-99	2.2	2.5
2014-03-07	10	-99	1	1.4	-99	-99	0.3	1.5	1.8	1.8	-99	-99	1.8	-99	1.5	0.9	-99	0.6	1.3	1.5	0.5	1.2	-99	1.2	-99	1.5	2.2
2014-03-07	11	-99	0.9	1.3	-99	-99	0.4	1.7	1.1	1	-99	-99	0.9	-99	0.9	0.6	-99	0.6	0.6	0.9	0.2	1.6	-99	0.8	-99	1.2	-99
2014-03-07	12	-99	0.8	0.8	-99	-99	0.2	1.2	0.5	0.5	-99	-99	0.7	-99	0.3	0.5	-99	0.5	0.6	-99	0.1	1.1	-99	0.5	-99	0.8	-99
2014-03-07	13	-99	0.6	0.5	-99	-99	0.3	0.5	0.3	0.3	-99	-99	0.5	-99	0.2	0.3	-99	0.4	0.3	0.5	0.2	0.8	-99	0.4	-99	0.4	-99
2014-03-07	14	-99	0.2	0.4	-99	-99	0.2	0.4	0.2	0.3	-99	-99	0.4	-99	0.2	0.2	-99	0.3	0.2	0.4	0.2	0.5	-99	0.4	-99	0.3	-99
2014-03-07	15	-99	0.2	0.4	-99	-99	0.3	0.4	0.2	0.4	-99	-99	0.4	-99	0.3	0.2	-99	0.2	0.3	0.5	0.2	0.3	-99	0.5	-99	0.2	0.4
2014-03-07	16	-99	0.2	0.4	-99	-99	0.3	0.5	0.3	0.5	-99	-99	0.5	-99	0.3	0.2	-99	0.2	0.3	0.4	0.2	0.4	-99	0.5	-99	0.3	0.4
2014-03-07	17	-99	0.2	0.4	-99	-99	0.3	0.4	0.3	0.5	-99	-99	0.5	-99	0.3	0.2	-99	0.3	0.4	0.5	0.2	0.8	-99	0.5	-99	0.3	0.5
2014-03-07	18	-99	0.3	0.7	-99	-99	0.3	0.6	0.3	0.4	-99	-99	0.5	-99	0.4	0.2	-99	0.2	0.4	0.5	0.2	0.7	-99	0.5	-99	0.3	0.6
2014-03-07	19	-99	0.5	0.6	-99	-99	0.3	1	0.5	0.6	-99	-99	0.7	-99	0.7	0.3	-99	0.3	0.4	0.5	0.2	0.8	-99	0.5	-99	0.3	-99
2014-03-07	20	-99	0.7	0.6	-99	-99	0.6	1	0.6	0.6	-99	-99	0.6	-99	0.6	0.7	-99	0.6	0.4	0.7	0.5	0.7	-99	0.7	-99	0.4	-99
2014-03-07	21	-99	0.7	0.7	-99	-99	0.4	1.4	0.7	0.9	-99	-99	1	-99	0.8	0.6	-99	0.5	0.8	1.1	0.6	1	-99	1.1	-99	0.4	1
2014-03-07	22	-99	0.9	1.8	-99	-99	0.3	1.3	0.8	1.3	-99	-99	1.9	-99	1.6	0.7	-99	0.3	1.3	1.6	0.5	1.5	-99	1	-99	0.7	1.7
2014-03-07	23	-99	0.5	0.7	-99	-99	0.3	1.1	0.4	0.8	-99	-99	0.8	-99	1.7	0.4	-99	0.3	1	1.7	0.3	2.5	-99	1	-99	1.4	2.1
2014-03-07	24	-99	0.6	0.4	-99	-99	0.2	1	0.3	0.5	-99	-99	0.6	-99	1.3	0.4	-99	0.2	0.9	1.8	0.3	2.1	-99	0.5	-99	1.7	1.4
2014-03-08	1	-99	0.5	0.6	-99	-99	0.2	1	0.3	1	-99	-99	1.3	-99	0.4	0.3	-99	0.2	1.5	1.2	0.4	1.7	-99	0.6	-99	1.9	2
2014-03-08	2	-99	0.5	1.4	-99	-99	0.2	0.8	0.9	0.6	-99	-99	1.3	-99	0.2	0.6	-99	0.2	0.5	0.6	0.4	1.3	-99	0.6	-99	1.3	1.1
2014-03-08	3	-99	0.6	1.8	-99	-99	0.2	0.7	0.6	0.7	-99	-99	0.7	-99	0.2	0.6	-99	0.2	0.4	0.6	0.2	0.9	-99	0.6	-99	1.8	0.6
2014-03-08	4	-99	0.7	1.6	-99	-99	0.2	0.6	0.5	0.4	-99	-99	1	-99	0.2	0.5	-99	0.3	0.7	1	0.2	1.2	-99	0.6	-99	1.7	0.7
2014-03-08	5	-99	0.6	1.3	-99	-99	0.2	0.6	0.6	0.8	-99	-99	1.1	-99	0.2	0.5	-99	0.3	0.8	1.1	0.3	0.9	-99	0.5	-99	1.3	0.7
2014-03-08	6	-99	1.1	1.4	-99	-99	0.3	0.9	0.7	1	-99	-99	1.9	-99	0.3	0.6	-99	0.3	0.7	1	0.3	1.5	-99	0.6	-99	0.7	1.3
2014-03-08	7	-99	1.6	1.9	-99	-99	0.3	1.9	1.1	1.2	-99	-99	2.6	-99	0.5	0.7	-99	0.5	1.1	1.1	0.6	1.4	-99	0.7	-99	1.4	1.4
2014-03-08	8	-99	2.3	3	-99	-99	0.4	2.7	1.1	1.3	-99	-99	3.3	-99	1.2	1	-99	0.7	1.9	1.4	0.7	1.9	-99	0.9	-99	1.6	2.4
2014-03-08	9	-99	1.3	1.9	-99	-99	0.5	1.8	0.8	1.1	-99	-99	1.6	-99	1.3	1	-99	0.5	1.8	1.5	0.7	2.4	-99	0.9	-99	1.1	2.1
2014-03-08	10	-99	0.8	1	-99	-99	0.7	1.9	0.7	0.8	-99	-99	1	-99	0.6	0.8	-99	0.6	1.1	0.9	0.3	1.9	-99	0.6	-99	0.5	1.2
2014-03-08	11	-99	0.9	0.9	-99	-99	0.6	1.6	0.3	0.3	-99	-99	0.4	-99	0.3	0.3	-99	0.6	0.4	0.4	0.1	1.6	-99	0.4	-99	0.5	0.7
2014-03-08	12	-99	0.9	0.5	-99	-99	0.3	1.1	0.2	0.2	-99	-99	0.5	-99	0.2	0.2	-99	0.5	0.2	0.4	0.2	0.9	-99	0.4	-99	0.5	0.5
2014-03-08	13	-99	0.8	0.4	-99	-99	0.2	0.6	0.2	0.3	-99	-99	0.5	-99	0.2	0.3	-99	0.1	0.2	0.4	0.2	0.6	-99	0.5	-99	-99	0.4
2014-03-08	14	-99	0.2	0.3	-99	-99	0.2	0.2	0.1	0.4	-99	-99	0.4	-99	-99	0.1	-99	0.1	0.2	0.3	-99	0.4	-99	0.5	-99	0.6	0.4
2014-03-08	15	-99	0.2	0.2	-99	-99	0.2	0.5	0	0.2	-99	-99	0.4	-99	-99	0.1	-99	0.1	0.2	0.3	0.4	0.4	-99	0.4	-99	0.4	0.5
2014-03-08	16	-99	0.2	0.3	-99	-99	0.2	0.4	0	0.2	-99	-99	0.5	-99	0.3	0.1	-99	0.1	0.3	0.4	0.5	0.4	-99	0.4	-99	0.2	0.5
2014-03-08	17	-99	0.1	0.2	-99	-99	0.2	0.3	0	0.3	-99	-99	0.5	-99	0.2	0.1	-99	0.1	0.2	0.4	0.4	0.3	-99	0.4	-99	0.3	0.5
2014-03-08	18	-99	0.1	0.2	-99	-99	0.3	0.3	0.1	0.3	-99	-99	0.5	-99	0.3	0.1	-99	0.2	0.2	0.4	0.4	0.3	-99	0.4	-99	0.3	0.3
2014-03-08	19	-99	0.1	0.2	-99	-99	0.3	0.5	0.1	0.4	-99	-99	0.5	-99	0.2	0.1	-99	0.2	0.3	0.4	0.3	0.3	-99	0.4	-99	0.3	0.5
2014-03-08	20	-99	0.3	0.3	-99	-99	0.3	0.6	0.2	0.5	-99	-99	0.6	-99	0.3	0.1	-99	0.2	0.4	0.5	0.3	0.6	-99	0.5	-99	0.4	0.8
2014-03-08	21	-99	0.4	0.5	-99	-99	0.3	0.7	0.4	0.5	-99	-99	0.5	-99	0.4	0.1	-99	0.2	0.4	0.4	0.3	0.5	-99	0.5	-99	0.4	0.8
2014-03-08	22	-99	0.3	0.5	-99	-99	0.3	0.9	0.3	0.5	-99	-99	0.6	-99	0.4	0.2	-99	0.2	0.4	0.3	0.4	0.7	-99	0.5	-99	0.2	0.8
2014-03-08	23	-99	0.6	0.6	-99	-99	0.3	0.8	0.3	0.5	-99	-99	0.5	-99	0.3	0.2	-99	0.2	0.5	0.5	0.4	0.7	-99	0.6	-99	0.4	0.9
2014-03-08	24	-99	0.6	0.4	-99	-99	0.3	0.6	0.4	0.4	-99	-99	0.5	-99	0.4	0.2	-99	-99	0.5	0.4	0.5	0.8	-99	0.5	-99	0.5	0.8
2014-03-09	1	-99	0.8	0.3	-99	-99	0.3	0.7	0.2	0.4	-99	-99	0.5	-99	0.2	0.2	-99	-99	0.5	0.4	0.5	0.7	-99	0.5	-99	0.6	0.9
2014-03-09	2	-99	0.4	0.3	-99	-99	0.3	0.8	0.3	0.4	-99	-99	0.4	-99	0.1	0.3	-99	-99	0.3	0.4	0.4	0.6	-99	0.5	-99	0.5	0.5
2014-03-09	3	-99	0.3	0.4	-99	-99	0.3	0.7	0.2	0.4	-99	-99	0.4	-99	0.2	0.2	-99	-99	0.4	0.4	0.5	0.7	-99	0.5	-99	0.7	0.6
2014-03-09	4	-99	0.3	0.6	-99	-99	0.3	0.5	0.3	0.3	-99	-99	0.6	-99	0.3	0.2	-99	-99	0.7	0.5	0.4	0.6	-99	0.6	-99	0.8	0.7
2014-03-09	5	-99	0.2	0.3	-99	-99	0.4	0.5	0.3	0.3	-99	-99	0.6	-99	0.4	0.2	-99	-99	0.7	0.7	0.4	0.6	-99	0.5	-99	0.9	0.9
2014-03-09	6	-99	0.4	0.5	-99	-99	0.2	0.5	0.3	0.5	-99	-99	1	-99	0.4	0.3	-99	0.2	0.9	0.7	0.4	0.4	-99	0.6	-99	0.8	1
2014-03-09	7	-99	0.7	0.8	-99	-99	0.4	0.8	0.7	0.7	-99	-99	1.4	-99	0.5	0.2	-99	0.3	0.8	0.6	0.5	0.5	-99	0.7	-99	1	1.6
2014-03-09	8	-99	1.1	0.8	-99	-99	0.7	1.1	0.9	1.1	-99	-99	1.9	-99	1.5	0.4	-99	0.4	1.1	0.9	1.3	0.7	-99	0.9	-99	1.3	3.3
2014-03-09	9	-99	1.1	0.8	-99	-99	0.5	1.4	0.6	1.1	-99	-99	1.4	-99	1.5	0.4	-99	0.5	1.4	0.9	0.9	0.9	-99	0.8	-99	0.9	1.8
2014-03-09	10	-99	0.8	0.9	-99	-99	0.5	1.6	0.7	1	-99	-99	1.3	-99	1.2	0.3	-99	0.3	0.9	0.7	0.4	0.8	-99	0.8	-99	0.6	1.1
2014-03-09	11	-99	0.7	0.8	-99	-99	0.4	1.3	0.6	0.4	-99	-99	0.7	-99	0.5	0.4	-99	0.4	0.8	0.8	0.3	0.8	-99	0.5	-99	0.7	0.9
2014-03-09	12	-99	0.5	0.4	-99	-99	0.5	0.8	0.3	0.4	-99	-99	0.5	-99	0.2	0.3	-99	0.4	0.2	0.4	0.3	0.6	-99	0.4	-99	0.7	0.7
2014-03-09	13	-99	0.4	0.3	-99	-99	0.4	0.5	0.1	0.3	-99	-99	0.3	-99	0.2	0.2	-99	0.3	0.2	0.4	0.2	0.4	-99	0.4	-99	0.5	0.2
2014-03-09	14	-99	0.3	0.2	-99	-99	0.3	0.5	0.1	0.3	-99	-99	0.3	-99	0.2	0.1	-99	0.2	0.3	0.3	0.2	0.3	-99	0.4	-99	0.1	0.3
2014-03-09	15	-99	0.1	0.2	-99	-99	0.2	0.3	0.2	0.3	-99	-99	0.3	-99	0.2	0.1	-99	0.1	-99	0.3	0.3	0.3	-99	0.4	-99	0.2	0.3
2014-03-09	16	-99	0.1	0.2	-99	-99	0.2	0.3	0.2	0.3	-99	-99	0.3	-99	0.2	0.1	-99	0.1	-99	0.4	0.3	0.4	-99	0.4	-99	0.1	0.3
2014-03-09	17	-99	0.2	0.2	-99	-99	0.2	0.3	0.1	-99	-99	-99	0.3	-99	0.2	0	-99	0.1	-99	0.4	0.3	0.3	-99	0.4	-99	0.2	0.2
2014-03-09	18	-99	0.2	0.3	-99	-99	0.3	0.3	0.2	-99	-99	-99	0.3	-99	0.2	0	-99	0.1	-99	0.4	0.3	0.2	-99	0.5	-99	0.2	0.3
2014-03-09	19	-99	0.1	0.2	-99	-99	0.3	0.3	0.2	0.4	-99	-99	0.4	-99	0.4	0	-99	0.2	-99	0.5	0.3	0.2	-99	0.6	-99	0.2	0.4
2014-03-09	20	-99	0.2	0.2	-99	-99	0.4	0.5	0.2	0.5	-99	-99	0.8	-99	0.5	0	-99	0.2	-99	0.6	0.3	0.3	-99	0.7	-99	-99	0.4
2014-03-09	21	-99	0.3	0.3	-99	-99	0.4	0.7	0.3	0.6	-99	-99	0.8	-99	0.4	0.1	-99	0.3	-99	0.6	0.6	0.3	-99	0.6	-99	0.2	0.5
2014-03-09	22	-99	0.3	0.3	-99	-99	0.4	0.9	0.4	0.7	-99	-99	0.9	-99	0.3	0.2	-99	0.3	-99	0.8	0.7	0.4	-99	0.6	-99	0.3	0.9
2014-03-09	23	-99	0.3	0.5	-99	-99	0.4	0.8	0.5	0.6	-99	-99	0.7	-99	0.2	0.4	-99	0.2	-99	0.6	0.3	0.5	-99	0.6	-99	0.6	1.5
2014-03-09	24	-99	0.3	0.7	-99	-99	0.3	0.7	0.4	0.4	-99	-99	0.6	-99	0.2	0.5	-99	0.3	-99	0.4	0.4	-99	-99	0.5	-99	0.7	2.1
2014-03-10	1	-99	0.2	1	-99	-99	0.3	0.6	0.3	0.2	-99	-99	0.4	-99	0.1	0.6	-99	0.3	1.1	0.3	0.3	-99	-99	0.4	-99	0.5	1.7
2014-03-10	2	-99	0.1	0.5	-99	-99	0.2	0.4	0.4	0.2	-99	-99	0.4	-99	0	0.5	-99	0.3	0.4	0.2	0.3	-99	-99	0.4	-99	0.5	1.5
2014-03-10	3	-99	0.2	0.4	-99	-99	0.2	0.3	0.5	0.1	-99	-99	0.3	-99	0	0.4	-99	0.3	0.3	0.2	0.2	-99	-99	0.4	-99	0.4	0.9
2014-03-10	4	-99	0.2	0.2	-99	-99	0.1	0.2	0.5	0	-99	-99	0.3	-99	0	0.4	-99	0.2	0.3	0.3	0.2	-99	-99	0.4	-99	0.6	0.7
2014-03-10	5	-99	0.2	0.1	-99	-99	0.2	0.2	0.1	0.2	-99	-99	0.4	-99	0.1	0.3	-99	0.2	0.4	0.4	0.2	-99	-99	0.4	-99	0.5	0.6
2014-03-10	6	-99	0.2	0.4	-99	-99	0.3	0.4	0.4	0.7	-99	-99	1	-99	0.3	0.4	-99	0.3	1.1	0.8	0.3	0.3	-99	0.6	-99	1	1.1
2014-03-10	7	-99	1.2	1	-99	-99	0.9	1.5	1.2	1.3	-99	-99	2.2	-99	0.9	0.5	-99	0.5	1.8	1.7	0.3	1.1	-99	1	-99	1.7	2.7
2014-03-10	8	-99	2.2	1.9	-99	-99	1.1	3.7	1	2.7	-99	-99	2.1	-99	3	1.1	-99	0.7	2.8	3	0.2	2.1	-99	1.3	-99	2.9	4
2014-03-10	9	-99	1	1	-99	-99	0.4	1.8	1.2	1.5	-99	-99	1.6	-99	3.3	1.4	-99	0.4	-99	2.7	0.3	1	-99	1.8	-99	1.6	1.4
2014-03-10	10	-99	0.3	0.3	-99	-99	0.3	0.5	0.8	1.2	-99	-99	1.2	-99	1.1	0.9	-99	0.4	-99	1.3	0.7	0.4	-99	1.3	-99	0.5	1.3
2014-03-10	11	-99	0.1	0.1	-99	-99	0.3	0.2	0.8	0.5	-99	-99	0.9	-99	0.4	0.4	-99	0.6	0.6	0.5	0.4	0.3	-99	0.7	-99	0.1	0.3
2014-03-10	12	-99	0.1	0.2	-99	-99	0.3	0.3	0.4	0.3	-99	-99	0.5	-99	0.4	0.3	-99	0.3	0.5	0.4	-99	0.3	-99	0.6	-99	0.1	0.4
2014-03-10	13	-99	0.1	0.3	-99	-99	0.4	0.4	0.3	0.3	-99	-99	0.7	-99	0.3	0.2	-99	0.2	0.5	0.5	-99	0.3	-99	0.6	-99	0.1	0.5
2014-03-10	14	-99	0.2	0.2	-99	-99	0.3	0.4	0.2	0.2	-99	-99	0.7	-99	0.4	0.1	-99	0.1	0.3	0.3	-99	0.4	-99	0.5	-99	0.2	0.4
2014-03-10	15	-99	0.2	0.3	-99	-99	0.3	0.4	0.2	0.2	-99	-99	0.7	-99	0.4	0.1	-99	0.1	0.4	0.4	-99	0.4	-99	0.5	-99	0.1	0.4
2014-03-10	16	-99	0.2	0.3	-99	-99	0.3	0.4	0.2	0.2	-99	-99	0.6	-99	0.3	0.1	-99	0.1	0.4	0.3	0.3	0.4	-99	0.5	-99	0.1	0.4
2014-03-10	17	-99	0.2	0.2	-99	-99	0.3	0.4	0.2	0.1	-99	-99	0.6	-99	0.2	0.1	-99	0.1	0.4	0.3	0.3	0.3	-99	0.5	-99	0.1	0.4
2014-03-10	18	-99	0.1	0.2	-99	-99	0.3	0.4	0.2	0.1	-99	-99	0.7	-99	0.2	0.1	-99	0.2	0.3	0.3	0.3	0.4	-99	0.4	-99	0.1	0.4
2014-03-10	19	-99	0.2	0.2	-99	-99	0.3	0.4	0.3	0.2	-99	-99	0.8	-99	0.3	0.1	-99	0.3	0.4	0.4	0.3	0.4	-99	0.5	-99	0.2	0.4
2014-03-10	20	-99	0.3	0.3	-99	-99	0.5	0.9	0.3	0.4	-99	-99	1	-99	0.5	0.1	-99	0.3	0.5	0.6	0.3	0.5	-99	0.7	-99	0.4	0.5
2014-03-10	21	-99	0.5	0.5	-99	-99	0.5	0.9	0.3	0.9	-99	-99	0.7	-99	0.5	0.3	-99	0.4	0.5	0.9	0.3	0.6	-99	1	-99	0.7	0.7
2014-03-10	22	-99	0.4	0.4	-99	-99	0.5	1.3	0.3	0.9	-99	-99	0.6	-99	0.9	0.4	-99	0.2	0.4	1.3	0.3	0.6	-99	1	-99	1	0.6
2014-03-10	23	-99	0.7	0.5	-99	-99	0.4	1.9	0.5	1.4	-99	-99	1	-99	0.9	0.4	-99	0.2	0.7	1.5	0.3	0.7	-99	0.9	-99	1.5	0.7
2014-03-10	24	-99	1	0.4	-99	-99	-99	1.2	0.1	1	-99	-99	-99	-99	0.9	0.1	-99	0.2	0.8	1	0.2	0.7	-99	1.1	-99	1.7	0.6
2014-03-11	1	-99	0.7	0.1	-99	-99	-99	0.6	0.2	0.5	-99	-99	-99	-99	0.7	0.1	-99	0.1	0.2	0.3	0.3	0.6	-99	1.1	-99	1.1	0.3
2014-03-11	2	-99	0.3	0.2	-99	-99	-99	0.5	0.2	0.5	-99	-99	-99	-99	0.2	0.1	-99	0.1	0.8	0.3	0.3	0.5	-99	0.9	-99	0.5	0.2
2014-03-11	3	-99	0.3	0.3	-99	-99	-99	0.4	0.2	0.5	-99	-99	-99	-99	0.3	0	-99	0.1	1.1	0.3	0.2	0.2	-99	0.6	-99	0.3	0.6
2014-03-11	4	-99	0.2	0.2	-99	-99	-99	0.4	0.2	0.4	-99	-99	-99	-99	0.2	0	-99	0.1	1	0.5	0.2	0.3	-99	0.7	-99	0.1	0.8
2014-03-11	5	-99	0.2	0.2	-99	-99	-99	0.4	0.4	0.7	-99	-99	-99	-99	0.5	0.1	-99	0.1	1.1	0.4	0.2	0.2	-99	0.8	-99	0.2	1
2014-03-11	6	-99	0.3	0.2	-99	-99	0.2	0.4	0.5	1.8	-99	-99	1.8	-99	0.8	0.1	-99	0.1	1.9	0.5	0.4	0.7	-99	1	-99	0.4	1.6
2014-03-11	7	-99	0.7	0.9	-99	-99	0.3	1.7	1	2.1	-99	-99	2.2	-99	2.4	0.4	-99	0.2	2.5	1.8	0.8	0.8	-99	1.3	-99	1.3	2.2
2014-03-11	8	-99	1.2	1.7	-99	-99	0.3	2	1.3	3	-99	-99	2.7	-99	3.8	0.6	-99	0.3	1.7	3.2	1.1	0.9	-99	1.6	-99	1.5	1.6
2014-03-11	9	-99	0.6	0.6	-99	-99	0.2	0.5	2.2	2.1	-99	-99	2	-99	3.4	0.7	-99	0.2	1.4	1.9	1	0.4	-99	1.1	-99	0.7	1.1
2014-03-11	10	-99	0.2	0.2	-99	-99	0.3	0.4	0.6	0.7	-99	-99	0.8	-99	0.3	0.3	-99	0.2	0.7	0.6	0.3	0.4	-99	0.5	-99	0.2	0.5
2014-03-11	11	-99	0.1	0.2	-99	-99	0.3	0.3	0.2	0.2	-99	-99	0.6	-99	0.3	0.2	-99	0.2	0.4	-99	0.3	0.3	-99	0.5	-99	0.2	0.3
2014-03-11	12	-99	0.1	0.2	-99	-99	0.3	0.3	0.2	0.3	-99	-99	0.5	-99	0.3	0.2	-99	0.2	0.3	-99	0.3	0.2	-99	0.5	-99	0.1	0.3
2014-03-11	13	-99	0.1	0.2	-99	-99	0.2	0.2	0.1	0.1	-99	-99	0.5	-99	0.3	0.2	-99	0.1	0.2	-99	0.5	0.2	-99	0.5	-99	0.1	0.3
2014-03-11	14	-99	0.1	0.2	-99	-99	0.2	0.3	0.1	0.1	-99	-99	0.5	-99	0.3	0.2	-99	0.1	0.2	-99	0.5	0.2	-99	0.5	-99	0.2	0.4
2014-03-11	15	-99	0.1	0.2	-99	-99	0.2	0.2	0.1	0.1	-99	-99	0.5	-99	0.3	0.2	-99	0.1	0.2	-99	0.5	0.2	-99	0.5	-99	0	0.4
2014-03-11	16	-99	0.1	0.3	-99	-99	0.2	0.3	0.1	0.1	-99	-99	0.5	-99	0.3	0.2	-99	0.1	0.2	0.5	0.6	0.3	-99	0.5	-99	0	0.4
2014-03-11	17	-99	0.1	0.3	-99	-99	0.2	0.3	0.1	0.1	-99	-99	0.6	-99	0.3	0.2	-99	0.1	0.2	0.4	0.6	0.3	-99	0.5	-99	0	0.4
2014-03-11	18	-99	0.1	0.3	-99	-99	0.2	0.2	0.1	0.2	-99	-99	0.6	-99	0.3	0.2	-99	0.1	0.2	0.5	0.5	0.3	-99	0.5	-99	0.1	0.6
2014-03-11	19	-99	0.2	0.5	-99	-99	0.3	0.3	0.3	0.2	-99	-99	0.9	-99	0.5	0.3	-99	0.2	0.3	0.5	0.5	0.4	-99	0.5	-99	0.2	0.8
2014-03-11	20	-99	0.2	0.8	-99	-99	0.4	0.4	0.5	0.5	-99	-99	1.3	-99	0.8	0.4	-99	0.4	0.6	0.6	0.5	0.6	-99	0.6	-99	0.5	0.9
2014-03-11	21	-99	0.3	1	-99	-99	0.3	2.1	0.6	0.7	-99	-99	0.9	-99	0.7	0.6	-99	0.3	0.7	0.9	0.5	1	-99	0.6	-99	0.5	1.1
2014-03-11	22	-99	1	1.2	-99	-99	0.4	1.9	0.4	1.1	-99	-99	1	-99	0.6	0.9	-99	0.1	1	1.1	0.9	1.6	-99	0.8	-99	0.8	1.1
2014-03-11	23	-99	1.5	1.5	-99	-99	0.3	1.6	1	1.4	-99	-99	1.5	-99	0.6	0.4	-99	0.1	0.9	0.8	1.5	1.7	-99	0.9	-99	1.1	0.9
2014-03-11	24	-99	1.4	1.2	-99	-99	0.2	1.1	-99	0.8	-99	-99	1.7	-99	0.6	-99	-99	0.1	1.3	0.9	2	1.2	-99	0.9	-99	1	1.8
2014-03-12	1	-99	0.8	0.5	-99	-99	0.2	1.1	-99	0.7	-99	-99	1	-99	1.1	-99	-99	0.1	1.1	0.9	1.2	1.1	-99	0.9	-99	1	1.6
2014-03-12	2	-99	0.7	0.4	-99	-99	0.2	0.8	-99	0.6	-99	-99	1.3	-99	0.5	-99	-99	0.1	1.3	0.8	1.1	0.9	-99	0.8	-99	0.8	1.2
2014-03-12	3	-99	0.5	0.6	-99	-99	0.2	0.7	-99	0.4	-99	-99	1	-99	0.2	-99	-99	0.2	0.9	0.5	0.8	0.8	-99	0.8	-99	0.5	1
2014-03-12	4	-99	0.6	0.7	-99	-99	0.2	0.5	-99	0.4	-99	-99	0.9	-99	0.3	-99	-99	0.2	0.9	0.4	0.8	0.5	-99	0.6	-99	0.4	1.1
2014-03-12	5	-99	0.5	0.6	-99	-99	0.2	0.5	-99	0.3	-99	-99	0.6	-99	0.7	-99	-99	0.2	1.3	0.4	0.8	0.4	-99	0.6	-99	0.5	2
2014-03-12	6	-99	0.7	0.7	-99	-99	0.5	0.8	0.4	0.5	-99	-99	1	-99	1.1	0.3	-99	0.3	2	0.8	1.2	0.9	-99	0.8	-99	0.9	2
2014-03-12	7	-99	2	1.7	-99	-99	1	2.3	1.1	1.4	-99	-99	1.8	-99	2	0.5	-99	0.5	2.2	1.3	-99	1.9	-99	0.9	-99	1.7	3.6
2014-03-12	8	-99	3	3	-99	-99	1.2	3.8	2	2.4	-99	-99	3.5	-99	3.4	1	-99	0.8	3	1.9	3.2	2.5	-99	1.4	-99	2.1	4.3
2014-03-12	9	-99	1.7	2.4	-99	-99	1.6	2.8	1.9	1.7	-99	-99	2.3	-99	2.7	1.6	-99	0.7	2.2	2.1	1.7	2.5	-99	1.1	-99	1.8	2.4
2014-03-12	10	-99	1.1	1.5	-99	-99	0.9	2.1	2	1.4	-99	-99	1.8	-99	2.1	1.4	-99	1.1	1.3	1.6	1.2	1.9	-99	1.1	-99	1.1	1.3
2014-03-12	11	-99	1.2	1.3	-99	-99	1	1.3	1.4	1.3	-99	-99	1.3	-99	1.4	0.9	-99	0.8	0.6	1.7	0.8	1.4	-99	1.5	-99	0.5	0.6
2014-03-12	12	-99	0.9	0.5	-99	-99	1	1.1	0.5	0.6	-99	-99	0.7	-99	0.4	0.7	-99	0.9	0.6	1.5	0.5	0.6	-99	1.1	-99	0.2	0.4
2014-03-12	13	-99	0.7	0.6	-99	-99	1.1	0.8	0.6	0.7	-99	-99	0.7	-99	0.4	0.8	-99	0.8	0.4	0.9	0.4	0.6	-99	0.8	-99	0.2	0.4
2014-03-12	14	-99	0.6	0.6	-99	-99	0.9	0.8	0.6	0.5	-99	-99	0.5	-99	0.4	0.6	-99	0.7	0.3	0.6	0.4	0.5	-99	0.6	-99	0.3	0.3
2014-03-12	15	-99	0.4	0.5	-99	-99	0.8	0.8	0.3	0.3	-99	-99	0.4	-99	0.5	0.4	-99	0.7	0.3	0.4	0.4	0.7	-99	0.5	-99	0.1	0.5
2014-03-12	16	-99	0.3	0.5	-99	-99	0.7	0.8	0.3	0.3	-99	-99	0.3	-99	0.3	0.3	-99	0.5	0.2	0.4	0.4	0.6	-99	-99	-99	0.2	0.4
2014-03-12	17	-99	0.3	0.5	-99	-99	0.5	0.8	0.3	0.6	-99	-99	0.4	-99	0.3	0.3	-99	0.4	0.2	0.5	0.5	0.6	-99	0.5	-99	-99	0.3
2014-03-12	18	-99	0.4	0.4	-99	-99	0.5	0.7	0.4	0.4	-99	-99	0.5	-99	0.4	0.2	-99	0.4	0.4	0.6	0.5	0.6	-99	0.6	-99	-99	0.5
2014-03-12	19	-99	0.4	0.5	-99	-99	0.5	0.8	0.4	0.5	-99	-99	0.5	-99	0.6	0.3	-99	0.4	0.3	0.5	0.4	0.7	-99	0.6	-99	-99	0.5
2014-03-12	20	-99	0.5	0.5	-99	-99	0.4	0.7	0.4	0.6	-99	-99	0.5	-99	0.8	0.4	-99	0.4	0.3	0.8	0.5	0.5	-99	0.8	-99	-99	0.4
2014-03-12	21	-99	0.4	0.5	-99	-99	0.5	0.6	0.4	0.4	-99	-99	0.8	-99	0.8	0.3	-99	0.4	0.4	0.8	0.7	0.6	-99	0.9	-99	-99	0.4
2014-03-12	22	-99	0.4	0.4	-99	-99	0.5	0.5	0.4	0.4	-99	-99	0.5	-99	0.7	0.3	-99	0.4	0.5	0.7	0.8	0.5	-99	0.8	-99	-99	0.6
2014-03-12	23	-99	0.3	0.3	-99	-99	0.4	0.5	0.3	0.3	-99	-99	0.4	-99	0.5	0.2	-99	0.3	0.3	0.6	0.8	0.4	-99	0.7	-99	-99	0.3
2014-03-12	24	-99	0.2	0.3	-99	-99	0.3	0.4	0.3	0.2	-99	-99	0.4	-99	0.3	0.2	-99	0.2	0.2	0.5	0.6	0.3	-99	0.6	-99	-99	-99
2014-03-13	1	-99	0.2	0.2	-99	-99	0.3	0.3	0.2	0.1	-99	-99	0.3	-99	0.3	0.1	-99	0.2	0.3	0.4	0.5	0.2	-99	0.6	-99	0.1	-99
2014-03-13	2	-99	0.2	0.2	-99	-99	0.4	0.3	0.2	0.1	-99	-99	0.3	-99	0.3	0.1	-99	0.3	0.3	0.3	0.5	0.2	-99	0.5	-99	0.1	-99
2014-03-13	3	-99	0.2	0.2	-99	-99	0.3	0.3	0.2	0.1	-99	-99	0.3	-99	0.2	0.1	-99	0.2	0.2	0.3	0.4	0.2	-99	0.5	-99	0.1	-99
2014-03-13	4	-99	0.2	0.2	-99	-99	0.3	0.3	0.2	0.1	-99	-99	0.3	-99	0.2	0.1	-99	0.2	0.2	0.3	0.4	0.2	-99	0.5	-99	0	-99
2014-03-13	5	-99	0.3	0.2	-99	-99	0.3	0.3	0.2	0.1	-99	-99	0.4	-99	0.2	0.1	-99	0.2	0.2	0.3	0.5	0.2	-99	0.5	-99	0.1	-99
2014-03-13	6	-99	0.4	0.3	-99	-99	0.5	0.7	0.3	0.1	-99	-99	0.6	-99	0.4	0.2	-99	0.3	0.5	0.4	0.6	0.4	-99	0.8	-99	0.4	0.5
2014-03-13	7	-99	1.1	0.9	-99	-99	0.9	1.6	0.4	0.4	-99	-99	1	-99	0.9	0.6	-99	0.5	1.4	1.3	0.6	0.9	-99	1.3	-99	0.8	1.3
2014-03-13	8	-99	1.9	1.5	-99	-99	1.3	2.7	0.7	0.7	-99	-99	1.1	-99	1.6	0.9	-99	0.8	1.9	2.1	1.6	1.3	-99	1.7	-99	0.9	2.1
2014-03-13	9	-99	0.9	1.1	-99	-99	1.1	1.3	1	1.2	-99	-99	1.4	-99	1.8	0.6	-99	0.7	0.9	1.9	0.8	1.5	-99	1.2	-99	0.5	1.3
2014-03-13	10	-99	0.6	1	-99	-99	1	1.2	1.2	1.2	-99	-99	1.9	-99	1.4	0.8	-99	0.8	1	1.6	0.8	1.6	-99	1.2	-99	0.4	1.3
2014-03-13	11	-99	1	1.1	-99	-99	1	1.3	1.4	1.1	-99	-99	1.5	-99	1.4	1	-99	-99	0.8	1.7	0.7	1.4	-99	1.4	-99	0.5	1.1
2014-03-13	12	-99	1.1	1.1	-99	-99	1	1.4	1.1	1	-99	-99	1	-99	0.9	1.1	-99	-99	0.6	1.6	0.5	1.4	-99	1.2	-99	0.6	0.8
2014-03-13	13	-99	0.8	0.7	-99	-99	0.9	1.1	0.7	0.7	-99	-99	0.6	-99	0.5	0.8	-99	-99	0.3	1	0.4	0.7	-99	0.8	-99	0.5	0.4
2014-03-13	14	-99	0.6	0.6	-99	-99	0.9	1.1	0.5	0.4	-99	-99	0.5	-99	0.2	0.5	-99	-99	0.3	0.5	0.4	0.7	-99	0.6	-99	0.7	0.4
2014-03-13	15	-99	0.7	0.6	-99	-99	0.6	1.1	0.4	0.3	-99	-99	0.4	-99	0.2	0.2	-99	0.3	0.2	0.4	0.4	0.8	-99	0.6	-99	0.4	0.5
2014-03-13	16	-99	0.7	0.5	-99	-99	0.3	0.9	0.3	0.4	-99	-99	0.5	-99	0.3	0.2	-99	0.3	0.2	0.5	0.4	0.8	-99	0.6	-99	0.5	0.4
2014-03-13	17	-99	0.5	0.5	-99	-99	0.3	0.8	0.4	0.4	-99	-99	0.5	-99	0.3	0.2	-99	0.2	0.3	0.4	0.4	0.7	-99	0.6	-99	0.4	0.6
2014-03-13	18	-99	0.6	0.5	-99	-99	0.3	1.1	0.4	0.5	-99	-99	0.6	-99	0.4	0.2	-99	0.2	0.4	0.5	0.4	0.9	-99	0.6	-99	0.5	0.6
2014-03-13	19	-99	0.4	0.5	-99	-99	0.3	0.7	0.5	0.4	-99	-99	0.6	-99	0.5	0.2	-99	0.2	0.5	0.5	0.4	0.8	-99	0.6	-99	0.6	0.6
2014-03-13	20	-99	0.4	0.4	-99	-99	0.4	1.1	0.7	0.5	-99	-99	0.7	-99	0.6	0.2	-99	0.2	0.5	0.6	0.4	0.7	-99	0.7	-99	0.6	0.7
2014-03-13	21	-99	0.8	0.5	-99	-99	0.5	1.6	0.7	0.8	-99	-99	0.7	-99	0.7	0.3	-99	0.2	0.5	0.5	0.6	1	-99	0.7	-99	0.6	0.7
2014-03-13	22	-99	0.7	0.9	-99	-99	0.6	2	0.6	0.7	-99	-99	0.9	-99	0.8	0.6	-99	0.5	0.6	0.6	0.6	1	-99	0.6	-99	0.6	0.8
2014-03-13	23	-99	0.9	1.1	-99	-99	0.5	1.3	0.8	0.8	-99	-99	0.8	-99	0.8	0.2	-99	0.7	0.8	0.8	0.6	1	-99	0.6	-99	0.9	1
2014-03-13	24	-99	1.1	1	-99	-99	0.5	0.7	0.8	0.6	-99	-99	0.9	-99	0.7	0.2	-99	0.4	0.7	0.6	0.6	0.9	-99	-99	-99	1.2	1.1
2014-03-14	1	-99	1.2	1	-99	-99	0.4	0.5	0.8	0.4	-99	-99	0.7	-99	0.4	0.2	-99	0.2	0.6	0.5	0.7	1	-99	-99	-99	1.1	0.8
2014-03-14	2	-99	0.8	0.8	-99	-99	0.4	0.6	0.6	0.2	-99	-99	0.7	-99	0.3	0.8	-99	0.2	0.4	0.4	0.5	0.9	-99	-99	-99	0.5	0.8
2014-03-14	3	-99	0.6	1	-99	-99	0.4	0.5	0.6	0.1	-99	-99	0.6	-99	0.2	0.5	-99	0.2	0.5	0.8	0.4	0.9	-99	-99	-99	0.4	0.8
2014-03-14	4	-99	0.4	0.9	-99	-99	0.2	0.5	0.8	0.2	-99	-99	0.5	-99	0.2	0.4	-99	0.2	0.4	0.6	0.4	0.4	-99	-99	-99	0.7	0.7
2014-03-14	5	-99	0.5	0.7	-99	-99	0.2	0.5	0.5	0.3	-99	-99	0.8	-99	0.2	0.4	-99	0.2	0.5	0.6	0.5	0.5	-99	-99	-99	0.9	1
2014-03-14	6	-99	0.9	1	-99	-99	0.3	0.8	0.5	0.8	-99	-99	1.5	-99	0.5	0.5	-99	0.3	0.9	0.6	0.7	1	-99	0.7	-99	1.2	1.6
2014-03-14	7	-99	2.2	2	-99	-99	0.4	2.1	0.8	1	-99	-99	3.1	-99	0.9	0.7	-99	0.6	2.2	0.9	0.8	1.9	-99	1	-99	1.6	2.2
2014-03-14	8	-99	2.8	2.8	-99	-99	0.5	4	1.4	1.6	-99	-99	2.6	-99	2	1.6	-99	0.7	3.5	1.7	1.7	2.7	-99	1.5	-99	1.9	2.6
2014-03-14	9	-99	1.2	1.9	-99	-99	0.5	2.2	1.6	1.4	-99	-99	2.2	-99	1.3	1.3	-99	0.5	2.6	1.8	1.7	2.7	-99	1.3	-99	1	2
2014-03-14	10	-99	0.9	1.4	-99	-99	0.6	1.7	1.6	1.2	-99	-99	1.6	-99	1.7	0.5	-99	0.6	1.1	1.1	0.9	1.8	-99	1	-99	0.9	1.2
2014-03-14	11	-99	0.9	1.4	-99	-99	-99	1.3	1.3	1	-99	-99	1	-99	1.6	0.5	-99	0.5	0.3	0.8	0.6	1.1	-99	1	-99	0.7	0.9
2014-03-14	12	-99	0.7	0.7	-99	-99	-99	0.8	0.6	0.8	-99	-99	0.6	-99	1	0.4	-99	0.4	0.3	0.7	0.5	0.7	-99	0.8	-99	0.6	0.5
2014-03-14	13	-99	0.7	0.6	-99	-99	0.7	0.9	0.5	0.6	-99	-99	0.6	-99	0.7	0.5	-99	0.5	0.4	0.8	0.4	0.7	-99	0.9	-99	0.6	0.5
2014-03-14	14	-99	0.6	0.6	-99	-99	0.8	0.9	0.5	0.5	-99	-99	0.5	-99	0.5	0.5	-99	0.6	0.4	0.7	0.4	0.7	-99	0.8	-99	0.6	0.6
2014-03-14	15	-99	0.5	0.6	-99	-99	0.7	0.9	0.4	0.4	-99	-99	0.6	-99	0.5	0.5	-99	0.5	0.4	0.7	0.4	0.9	-99	0.7	-99	0.5	0.6
2014-03-14	16	-99	0.4	0.7	-99	-99	0.7	0.8	0.5	0.5	-99	-99	0.7	-99	0.4	0.5	-99	0.5	0.4	0.7	0.4	0.7	-99	0.8	-99	0.3	0.7
2014-03-14	17	-99	0.5	0.7	-99	-99	0.6	0.9	0.5	0.4	-99	-99	0.6	-99	0.4	0.4	-99	0.5	0.4	0.6	0.5	1.2	-99	0.7	-99	0.2	0.8
2014-03-14	18	-99	0.7	0.7	-99	-99	0.4	1.2	0.6	0.5	-99	-99	0.6	-99	0.4	0.3	-99	0.4	0.5	0.6	0.4	1.2	-99	0.7	-99	0.2	0.7
2014-03-14	19	-99	0.8	0.8	-99	-99	0.3	1.8	0.5	0.4	-99	-99	0.9	-99	0.5	0.3	-99	0.3	0.4	0.6	0.4	0.7	-99	0.7	-99	0.6	0.6
2014-03-14	20	-99	0.8	0.8	-99	-99	0.3	1.7	0.7	0.5	-99	-99	0.8	-99	0.7	0.5	-99	0.3	0.6	0.6	0.5	0.9	-99	0.7	-99	0.4	0.5
2014-03-14	21	-99	1.1	1	-99	-99	0.4	1.6	0.8	0.8	-99	-99	1	-99	1.1	0.5	-99	0.3	0.9	0.7	0.7	1.1	-99	1	-99	0.8	0.9
2014-03-14	22	-99	1.1	1.2	-99	-99	0.3	2.5	0.9	0.8	-99	-99	1.1	-99	0.9	0.4	-99	0.2	1	0.8	0.8	1.8	-99	0.9	-99	0.5	1.2
2014-03-14	23	-99	1.1	1	-99	-99	0.4	2.3	0.6	0.3	-99	-99	1.1	-99	1.2	0.4	-99	0.2	1.6	1.4	0.8	2.1	-99	1.5	-99	0.6	1.4
2014-03-14	24	-99	0.6	1.8	-99	-99	0.4	1.4	0.6	0.6	-99	-99	1.2	-99	1.3	0.4	-99	0.2	1.5	1.6	0.7	2.2	-99	1.2	-99	0.9	1.9
2014-03-15	1	-99	0.5	1	-99	-99	0.3	1.2	0.6	1	-99	-99	1.3	-99	1.7	0.8	-99	0.2	1.2	1.2	1.1	1.2	-99	0.9	-99	0.6	1.9
2014-03-15	2	-99	0.5	0.5	-99	-99	0.3	1.1	0.6	1	-99	-99	1.1	-99	1	0.5	-99	0.2	1.2	1.3	1	0.9	-99	0.9	-99	0.6	1.9
2014-03-15	3	-99	0.4	0.6	-99	-99	0.3	0.7	0.7	0.8	-99	-99	1.2	-99	1	0.3	-99	0.1	1.5	1.2	0.7	0.5	-99	1	-99	0.7	2.1
2014-03-15	4	-99	0.6	0.6	-99	-99	0.3	0.5	0.9	0.8	-99	-99	1.4	-99	0.5	0.2	-99	0.1	1	0.9	0.5	0.7	-99	0.9	-99	0.6	1.9
2014-03-15	5	-99	0.4	0.8	-99	-99	0.3	0.5	0.9	0.7	-99	-99	1.4	-99	1.1	0.3	-99	0.2	1.5	0.8	0.6	0.7	-99	0.8	-99	0.5	1.8
2014-03-15	6	-99	0.5	0.9	-99	-99	0.3	0.9	0.8	0.7	-99	-99	1.6	-99	1.4	0.2	-99	0.2	1.2	1.3	0.6	0.8	-99	1.1	-99	0.8	2.6
2014-03-15	7	-99	1.1	1.4	-99	-99	0.3	1.2	1.2	1.3	-99	-99	1.8	-99	1.4	0.4	-99	0.5	2.1	1.8	1.7	1	-99	1.2	-99	1.5	3.8
2014-03-15	8	-99	1.8	2.2	-99	-99	0.8	2.5	2.3	1.9	-99	-99	2.6	-99	1.9	0.6	-99	0.5	2.5	2.4	1.9	1.8	-99	1.7	-99	2.3	4.2
2014-03-15	9	-99	1.2	2.1	-99	-99	0.5	2	1.9	1.9	-99	-99	2.1	-99	2	0.9	-99	0.4	1.3	1.6	2.1	1.5	-99	1.3	-99	1	2.4
2014-03-15	10	-99	1.1	1.7	-99	-99	0.6	2.5	1.7	1.2	-99	-99	1.5	-99	1.9	1	-99	0.4	0.6	1.2	1	1.2	-99	1.2	-99	0.7	1.1
2014-03-15	11	-99	0.9	0.9	-99	-99	0.6	1.5	0.9	1.1	-99	-99	0.7	-99	1.2	0.5	-99	0.5	0.3	0.8	0.6	1	-99	1	-99	0.3	0.7
2014-03-15	12	-99	0.7	0.5	-99	-99	0.7	1.1	0.8	0.8	-99	-99	0.5	-99	0.4	0.5	-99	0.5	0.2	0.8	0.5	0.6	-99	0.9	-99	0.3	0.6
2014-03-15	13	-99	0.7	0.7	-99	-99	0.6	1.1	0.7	0.8	-99	-99	0.7	-99	0.6	0.5	-99	0.6	0.4	0.8	0.5	0.8	-99	0.8	-99	0.3	0.5
2014-03-15	14	-99	0.6	0.7	-99	-99	0.3	1	0.7	0.6	-99	-99	0.7	-99	0.5	0.4	-99	0.4	0.5	0.6	0.5	0.7	-99	0.7	-99	0.4	0.5
2014-03-15	15	-99	0.6	0.7	-99	-99	0.3	1	0.5	0.4	-99	-99	0.7	-99	0.4	0.3	-99	0.2	0.4	0.6	0.5	0.7	-99	0.6	-99	0.4	0.6
2014-03-15	16	-99	0.5	0.5	-99	-99	0.3	0.5	0.4	0.5	-99	-99	0.5	-99	0.4	0.2	-99	0.2	0.4	0.5	0.5	0.7	-99	0.6	-99	0.4	0.7
2014-03-15	17	-99	0.2	0.5	-99	-99	0.3	0.3	0.3	0.5	-99	-99	0.5	-99	0.4	0.2	-99	0.2	0.3	0.5	0.5	0.4	-99	0.6	-99	0.4	0.7
2014-03-15	18	-99	0.2	0.4	-99	-99	0.3	0.3	0.2	-99	-99	-99	0.6	-99	0.4	0.2	-99	0.2	0.4	0.5	0.5	0.3	-99	0.6	-99	0.2	0.6
2014-03-15	19	-99	0.2	0.3	-99	-99	0.3	0.3	0.3	0.4	-99	-99	0.7	-99	0.4	0.2	-99	0.2	0.3	0.6	0.4	0.4	-99	0.6	-99	0.4	0.5
2014-03-15	20	-99	0.2	0.4	-99	-99	0.3	0.4	0.3	0.6	-99	-99	0.8	-99	0.5	0.2	-99	0.2	0.5	0.6	0.4	0.5	-99	0.6	-99	0.5	0.7
2014-03-15	21	-99	0.3	0.4	-99	-99	0.3	0.9	0.2	0.5	-99	-99	0.8	-99	0.7	0.4	-99	0.2	0.5	0.6	0.6	0.4	-99	0.7	-99	0.6	0.5
2014-03-15	22	-99	0.5	0.4	-99	-99	0.5	0.9	0.4	0.9	-99	-99	0.7	-99	0.7	0.7	-99	0.2	0.4	0.5	0.8	0.6	-99	0.8	-99	0.6	0.5
2014-03-15	23	-99	0.7	0.4	-99	-99	0.4	0.6	0.7	1	-99	-99	1.3	-99	0.9	0.5	-99	0.2	1.1	1	1.3	0.5	-99	1.1	-99	0.9	1
2014-03-15	24	-99	0.8	0.2	-99	-99	0.3	0.9	0.3	0.6	-99	-99	0.8	-99	0.7	0.3	-99	-99	1.2	1.5	1.2	0.6	-99	1.1	-99	0.8	1.1
2014-03-16	1	-99	0.7	0.2	-99	-99	0.3	0.9	0.2	0.1	-99	-99	0.4	-99	0.6	0.2	-99	-99	0.3	1	0.7	0.9	-99	0.9	-99	0.9	0.6
2014-03-16	2	-99	1.1	0.2	-99	-99	0.3	0.7	0.2	0.4	-99	-99	0.4	-99	0.5	0.3	-99	-99	0.4	0.8	0.7	0.7	-99	1.1	-99	0.8	0.4
2014-03-16	3	-99	1.1	0.2	-99	-99	0.3	0.8	0.3	0.7	-99	-99	0.3	-99	0.2	0.2	-99	-99	0.6	0.7	0.5	0.5	-99	1	-99	0.6	0.6
2014-03-16	4	-99	1	0.3	-99	-99	0.3	0.9	0.5	0.7	-99	-99	1.1	-99	0.7	0.2	-99	-99	0.6	0.9	0.5	0.4	-99	0.7	-99	0.5	0.7
2014-03-16	5	-99	0.7	0.6	-99	-99	0.3	0.6	0.6	0.5	-99	-99	0.7	-99	0.7	0.2	-99	-99	1.1	0.8	0.6	0.6	-99	0.8	-99	0.8	1
2014-03-16	6	-99	0.5	2	-99	-99	0.3	0.6	0.6	0.4	-99	-99	0.8	-99	1.3	0.2	-99	0.1	1.3	0.8	0.7	0.5	-99	0.8	-99	0.8	1.4
2014-03-16	7	-99	0.8	0.9	-99	-99	0.3	0.7	0.6	0.8	-99	-99	1.3	-99	0.7	0.2	-99	0.3	1.5	1.4	0.7	1.1	-99	0.8	-99	1.6	2.5
2014-03-16	8	-99	1.3	0.8	-99	-99	0.4	1.3	0.8	1	-99	-99	1.6	-99	0.6	0.4	-99	0.4	1.7	1.1	0.9	1.4	-99	0.9	-99	1.2	3.2
2014-03-16	9	-99	1.4	0.6	-99	-99	0.5	1.6	0.7	0.8	-99	-99	1.2	-99	0.6	0.5	-99	0.3	1.3	0.9	1.2	1	-99	1	-99	1.3	1.1
2014-03-16	10	-99	0.8	0.6	-99	-99	0.3	1.1	0.6	0.6	-99	-99	0.7	-99	-99	0.4	-99	0.6	0.7	0.8	0.4	0.8	-99	0.8	-99	0.6	0.8
2014-03-16	11	-99	0.6	0.5	-99	-99	0.2	0.8	0.5	0.4	-99	-99	0.5	-99	-99	0.3	-99	0.1	0.3	0.6	0.4	0.8	-99	0.6	-99	0.5	0.5
2014-03-16	12	-99	0.2	0.2	-99	-99	0.2	-99	0.1	0.1	-99	-99	0.4	-99	0.2	0.1	-99	0.1	0.1	0.4	0.4	0.3	-99	0.5	-99	0.2	0.4
2014-03-16	13	-99	0.2	0.2	-99	-99	0.3	0.3	0	0.1	-99	-99	0.4	-99	0.2	0.1	-99	0.1	0.1	0.3	0.4	0.2	-99	0.5	-99	0.1	0.3
2014-03-16	14	-99	0.1	0.2	-99	-99	0.3	0.3	0.1	0.1	-99	-99	0.4	-99	0.2	0.1	-99	0.1	0.1	0.3	0.4	0.2	-99	0.5	-99	0.1	0.3
2014-03-16	15	-99	0.1	0.2	-99	-99	0.2	0.2	0	0.1	-99	-99	0.4	-99	0.2	-99	-99	0.1	0.1	0.4	0.4	0.2	-99	0.5	-99	0	0.2
2014-03-16	16	-99	0.1	0.2	-99	-99	0.2	0.2	0.1	0.1	-99	-99	0.4	-99	0.2	0.1	-99	0.1	0.1	0.4	0.4	0.2	-99	0.6	-99	0	0.2
2014-03-16	17	-99	0.1	0.2	-99	-99	0.1	0.3	0.1	0.1	-99	-99	0.4	-99	0.2	0.1	-99	-99	0.1	0.4	0.4	0.2	-99	0.5	-99	0	-99
2014-03-16	18	-99	0.1	0.2	-99	-99	0.1	0.3	0.1	0.1	-99	-99	0.4	-99	0.2	0.1	-99	0.1	0.1	0.4	0.4	0.3	-99	0.5	-99	0.1	-99
2014-03-16	19	-99	0.2	0.3	-99	-99	0.1	0.4	0.1	0.2	-99	-99	0.4	-99	0.2	0.1	-99	0.2	0.2	0.5	0.4	0.3	-99	0.5	-99	0.1	-99
2014-03-16	20	-99	0.2	0.3	-99	-99	0.3	0.5	0.2	0.5	-99	-99	0.6	-99	0.4	0.1	-99	0.2	0.4	0.6	0.4	0.4	-99	0.6	-99	0.3	-99
2014-03-16	21	-99	0.3	0.4	-99	-99	0.4	0.6	0.3	0.7	-99	-99	0.6	-99	0.6	0.1	-99	0.4	0.5	0.6	0.4	0.5	-99	0.7	-99	0.2	0.8
2014-03-16	22	-99	0.3	0.4	-99	-99	0.3	0.5	0.3	0.5	-99	-99	0.5	-99	0.3	0.1	-99	0.2	0.4	0.5	0.4	0.3	-99	0.6	-99	0.2	0.6
2014-03-16	23	-99	0.2	0.5	-99	-99	0.2	0.5	0.3	0.5	-99	-99	0.5	-99	0.2	0.1	-99	0.2	0.4	0.4	0.3	0.2	-99	0.5	-99	0.2	0.6
2014-03-16	24	-99	0.2	0.8	-99	-99	0.2	0.5	0.3	0.4	-99	-99	0.4	-99	0.2	0.2	-99	0.2	0.3	0.3	0.4	-99	-99	0.5	-99	0.6	0.5
2014-03-17	1	-99	0.2	0.4	-99	-99	0.2	0.3	0.2	0.2	-99	-99	0.1	-99	0.1	0.1	-99	0.2	0.1	0.2	0.3	-99	-99	0.4	-99	0.5	0.4
2014-03-17	2	-99	0.3	0.3	-99	-99	0.2	0.4	0.2	0.1	-99	-99	0.1	-99	0.1	0.1	-99	0.2	0.1	0.2	0.3	-99	-99	0.5	-99	0.1	0.2
2014-03-17	3	-99	0.3	0.1	-99	-99	0.2	0.3	0.1	0	-99	-99	0.1	-99	0	0	-99	0.2	0	0.2	0.3	-99	-99	0.5	-99	0	0.1
2014-03-17	4	-99	0.3	0.2	-99	-99	0.2	0.4	0.1	0.1	-99	-99	0.1	-99	0	0.1	-99	0.2	0.1	0.2	0.3	-99	-99	0.4	-99	0	0.2
2014-03-17	5	-99	0.3	0.2	-99	-99	0.3	0.4	0.2	0.1	-99	-99	0.3	-99	0.1	0.2	-99	-99	0.1	0.3	0.3	-99	-99	0.5	-99	0.1	0.2
2014-03-17	6	-99	0.3	0.2	-99	-99	0.4	0.4	0.2	0.1	-99	-99	0.4	-99	0.1	0.2	-99	0.2	0.1	0.4	0.3	0.3	-99	0.6	-99	0.1	0.5
2014-03-17	7	-99	0.4	0.3	-99	-99	0.5	0.5	0.3	0.3	-99	-99	0.7	-99	0.3	0.2	-99	0.2	0.3	0.5	0.5	0.5	-99	0.7	-99	0.2	0.9
2014-03-17	8	-99	0.4	0.4	-99	-99	0.5	0.5	0.4	0.4	-99	-99	0.9	-99	0.3	0.2	-99	0.3	0.4	0.7	0.6	0.5	-99	0.8	-99	0.1	0.8
2014-03-17	9	-99	0.5	0.3	-99	-99	0.5	0.6	0.4	0.4	-99	-99	0.8	-99	0.3	0.3	-99	0.3	0.3	0.8	0.7	0.4	-99	0.9	-99	0.1	0.6
2014-03-17	10	-99	0.5	0.4	-99	-99	0.5	0.6	0.4	0.5	-99	-99	0.9	-99	0.2	0.4	-99	0.3	0.4	0.8	0.7	0.5	-99	1	-99	0.1	0.4
2014-03-17	11	-99	0.5	0.4	-99	-99	0.6	0.6	0.6	0.5	-99	-99	0.7	-99	0.3	0.4	-99	0.4	0.3	0.8	0.6	0.5	-99	0.8	-99	0.1	0.5
2014-03-17	12	-99	0.6	0.5	-99	-99	0.5	0.7	0.5	0.4	-99	-99	0.5	-99	0.4	0.5	-99	0.5	0.3	0.6	0.5	0.6	-99	0.8	-99	0.1	0.4
2014-03-17	13	-99	0.5	0.5	-99	-99	0.2	0.7	0.4	0.4	-99	-99	0.6	-99	0.4	0.3	-99	0.1	0.3	0.6	0.3	0.7	-99	0.6	-99	0.2	0.4
2014-03-17	14	-99	0.5	0.3	-99	-99	0.2	0.4	0.1	0.1	-99	-99	0.6	-99	0.2	0.1	-99	0	0.2	0.5	0.4	0.6	-99	0.5	-99	0.2	0.4
2014-03-17	15	-99	0.4	0.2	-99	-99	0.2	0.4	0.1	0.2	-99	-99	0.5	-99	0.2	0.1	-99	0	0.1	0.4	0.4	0.6	-99	0.6	-99	0.2	0.5
2014-03-17	16	-99	0.5	0.5	-99	-99	0.2	0.7	0.1	0.1	-99	-99	0.5	-99	0.2	0.1	-99	0	0.3	0.3	0.4	0.5	-99	0.5	-99	0.1	0.5
2014-03-17	17	-99	0.4	0.4	-99	-99	0.2	0.6	0.2	0.2	-99	-99	0.7	-99	0.4	0.1	-99	0	0.3	0.3	0.4	0.5	-99	0.5	-99	0.1	0.5
2014-03-17	18	-99	0.5	0.4	-99	-99	0.3	0.6	0.3	0.4	-99	-99	0.7	-99	0.4	0.1	-99	0	0.3	0.6	0.4	0.4	-99	0.7	-99	0.1	0.3
2014-03-17	19	-99	0.5	0.4	-99	-99	0.4	0.7	0.3	0.4	-99	-99	0.7	-99	0.5	0.4	-99	0.3	0.3	0.7	0.7	0.4	-99	0.8	-99	0.2	0.4
2014-03-17	20	-99	0.5	0.5	-99	-99	0.6	0.6	0.3	0.4	-99	-99	0.7	-99	0.6	0.4	-99	0.4	0.3	0.8	0.7	0.5	-99	0.9	-99	0.3	0.6
2014-03-17	21	-99	0.6	0.6	-99	-99	0.6	0.6	0.4	0.4	-99	-99	0.7	-99	0.5	0.4	-99	0.4	0.3	0.7	0.8	0.7	-99	0.8	-99	0.4	0.5
2014-03-17	22	-99	0.7	0.6	-99	-99	0.6	0.7	0.5	0.5	-99	-99	0.5	-99	0.5	0.5	-99	0.5	0.4	0.8	0.9	0.8	-99	0.8	-99	0.4	0.5
2014-03-17	23	-99	0.8	0.6	-99	-99	0.6	1.1	0.5	0.5	-99	-99	0.7	-99	0.5	0.6	-99	0.6	0.4	0.7	0.8	0.8	-99	1	-99	0.6	0.7
2014-03-17	24	-99	0.8	0.7	-99	-99	-99	0.9	0.5	0.5	-99	-99	-99	-99	0.5	0.5	-99	0.5	0.4	0.7	0.9	0.7	-99	1.5	-99	1	1
2014-03-18	1	-99	0.6	0.6	-99	-99	-99	0.6	0.5	0.5	-99	-99	-99	-99	0.4	0.5	-99	0.4	0.9	0.8	1.1	0.3	-99	1.7	-99	1	0.9
2014-03-18	2	-99	0.5	0.5	-99	-99	-99	0.6	0.5	0.3	-99	-99	-99	-99	0.3	0.4	-99	0.3	0.6	0.8	0.7	0.3	-99	1.3	-99	0.6	0.8
2014-03-18	3	-99	0.4	0.4	-99	-99	-99	0.5	0.5	0.5	-99	-99	-99	-99	0.4	0.4	-99	0.3	0.7	0.8	0.5	0.3	-99	1.2	-99	0.5	0.6
2014-03-18	4	-99	0.4	0.4	-99	-99	-99	0.6	0.7	0.7	-99	-99	-99	-99	-99	0.3	-99	0.3	0.7	0.8	0.4	0.3	-99	0.9	-99	0.6	0.5
2014-03-18	5	-99	0.6	0.5	-99	-99	-99	0.6	0.6	0.3	-99	-99	-99	-99	0.4	0.3	-99	0.3	1.1	0.8	0.5	0.5	-99	0.6	-99	0.6	0.7
2014-03-18	6	-99	0.5	0.8	-99	-99	0.5	0.9	0.5	0.5	-99	-99	0.7	-99	0.5	0.3	-99	0.3	1.2	0.8	0.7	0.6	-99	0.7	-99	1.1	1.7
2014-03-18	7	-99	1.6	1.2	-99	-99	1.2	2	0.7	0.9	-99	-99	1	-99	1	0.4	-99	0.4	1.2	1.1	0.7	1	-99	1.4	-99	2.2	1.6
2014-03-18	8	-99	3.2	2	-99	-99	0.9	3	1	1.4	-99	-99	1.4	-99	1.4	0.7	-99	0.6	1.1	1.5	1.2	1.7	-99	1.2	-99	3.1	1.6
2014-03-18	9	-99	1.7	1.5	-99	-99	0.7	1.8	1.2	1.1	-99	-99	1.5	-99	1.3	0.6	-99	0.5	1	0.9	0.8	0.9	-99	0.9	-99	2.8	1.5
2014-03-18	10	-99	1	0.7	-99	-99	0.6	1.7	0.7	0.6	-99	-99	0.9	-99	0.3	0.2	-99	0.3	0.4	0.4	0.5	1.1	-99	0.6	-99	1.3	1
2014-03-18	11	-99	0.5	0.3	-99	-99	0.4	0.9	0.3	-99	-99	-99	0.3	-99	0.2	0.1	-99	0.2	0.2	0.4	0.3	0.7	-99	0.5	-99	0.7	0.4
2014-03-18	12	-99	0.4	0.3	-99	-99	0.3	0.6	0.2	-99	-99	-99	0.2	-99	0.2	0.1	-99	0.2	-99	0.3	0.3	0.5	-99	0.5	-99	0.3	0.3
2014-03-18	13	-99	0.4	0.4	-99	-99	0.3	0.3	0.2	-99	-99	-99	0.3	-99	-99	0.2	-99	0.1	-99	0.4	0.3	0.4	-99	0.5	-99	0.2	0.4
2014-03-18	14	-99	0.3	0.2	-99	-99	0.3	0.3	0.1	-99	-99	-99	0.5	-99	-99	0.1	-99	0.1	-99	0.5	0.3	0.4	-99	0.5	-99	0.2	0.4
2014-03-18	15	-99	0.3	0.3	-99	-99	0.4	0.3	0.2	0.1	-99	-99	0.5	-99	0.3	0.1	-99	0.2	-99	0.4	0.4	0.4	-99	0.6	-99	0.2	0.4
2014-03-18	16	-99	0.2	0.3	-99	-99	0.4	0.3	0.2	0.2	-99	-99	0.5	-99	0.2	0.1	-99	0.2	0.2	0.4	0.4	0.4	-99	0.6	-99	0.2	0.4
2014-03-18	17	-99	0.2	0.3	-99	-99	0.4	0.3	0.3	0.4	-99	-99	0.5	-99	0.3	0.1	-99	0.2	0.3	0.5	0.3	0.4	-99	0.6	-99	0.2	0.5
2014-03-18	18	-99	0.3	0.3	-99	-99	0.4	0.5	0.3	0.3	-99	-99	0.6	-99	0.3	0.1	-99	0.2	0.5	0.5	0.4	0.4	-99	0.6	-99	0.2	0.5
2014-03-18	19	-99	0.2	0.3	-99	-99	0.4	0.6	0.4	0.4	-99	-99	0.6	-99	0.5	0.2	-99	0.2	0.4	0.6	0.4	0.5	-99	0.6	-99	0.4	0.6
2014-03-18	20	-99	0.3	0.4	-99	-99	0.5	0.8	0.5	0.7	-99	-99	0.6	-99	0.5	0.3	-99	0.2	0.5	0.6	0.6	0.5	-99	0.8	-99	0.3	0.7
2014-03-18	21	-99	0.5	0.3	-99	-99	0.6	1	0.6	0.7	-99	-99	0.7	-99	0.5	0.4	-99	0.2	0.6	0.7	0.5	0.6	-99	1	-99	0.4	0.8
2014-03-18	22	-99	0.8	0.3	-99	-99	0.4	0.7	0.6	0.8	-99	-99	0.7	-99	0.5	0.4	-99	0.3	0.7	0.7	0.8	0.7	-99	0.7	-99	0.7	0.8
2014-03-18	23	-99	0.7	0.3	-99	-99	0.4	0.9	0.4	0.7	-99	-99	0.6	-99	0.4	0.5	-99	0.2	0.6	0.8	0.4	0.7	-99	0.6	-99	0.6	0.7
2014-03-18	24	-99	0.9	0.3	-99	-99	0.5	0.6	-99	0.4	-99	-99	0.6	-99	0.4	-99	-99	0.4	0.5	0.7	0.6	0.6	-99	0.7	-99	0.7	0.7
2014-03-19	1	-99	0.6	0.4	-99	-99	0.4	0.5	-99	0.3	-99	-99	0.4	-99	0.2	-99	-99	0.2	0.4	0.5	0.5	0.7	-99	0.7	-99	0.4	0.5
2014-03-19	2	-99	0.5	0.4	-99	-99	0.3	0.4	-99	0.2	-99	-99	0.3	-99	0.1	-99	-99	0.2	0.2	0.5	0.5	0.7	-99	0.6	-99	0.6	0.3
2014-03-19	3	-99	0.4	0.6	-99	-99	0.4	0.4	-99	0.2	-99	-99	0.3	-99	0.1	-99	-99	0.2	0.4	0.5	0.4	0.5	-99	0.6	-99	0.6	0.3
2014-03-19	4	-99	0.5	0.5	-99	-99	0.3	0.5	-99	0.2	-99	-99	0.5	-99	0.2	-99	-99	0.2	0.3	0.7	0.4	0.5	-99	0.6	-99	0.6	0.5
2014-03-19	5	-99	0.5	0.6	-99	-99	0.5	0.5	-99	0.4	-99	-99	0.6	-99	0.2	-99	-99	0.3	0.3	0.6	0.4	0.5	-99	0.6	-99	0.6	0.7
2014-03-19	6	-99	-99	0.8	-99	-99	0.7	0.9	-99	0.5	-99	-99	1.3	-99	0.5	0.3	-99	0.4	0.7	0.6	0.9	0.6	-99	0.7	-99	0.8	1.5
2014-03-19	7	-99	1.4	1.4	-99	-99	1.4	1.8	-99	1.2	-99	-99	1.9	-99	1.9	0.5	-99	0.6	3.1	1	1	1.6	-99	1	-99	1.7	3
2014-03-19	8	-99	2.5	2.1	-99	-99	0.9	3.9	-99	2	-99	-99	2.4	-99	3.3	1.1	-99	0.6	3.9	2.1	1.2	2.6	-99	1.4	-99	1.6	2.8
2014-03-19	9	-99	1.8	1.8	-99	-99	0.6	1.9	-99	1.8	-99	-99	1.9	-99	2.1	0.7	-99	0.6	2.1	2.1	1	2	-99	1.4	-99	0.9	2.2
2014-03-19	10	-99	1.2	1.8	-99	-99	0.7	1.3	-99	1.2	-99	-99	1.8	-99	0.6	0.7	-99	0.6	0.7	1	0.5	1.6	-99	1.1	-99	0.8	1.2
2014-03-19	11	-99	-99	1.2	-99	-99	1.1	1.4	-99	1.3	-99	-99	1.3	-99	0.6	0.5	-99	0.8	0.5	0.7	0.5	1.6	-99	1	-99	0.9	0.8
2014-03-19	12	-99	-99	0.8	-99	-99	0.9	1	-99	0.9	-99	-99	1.2	-99	0.5	0.7	-99	0.5	0.4	0.9	0.3	0.8	-99	1.1	-99	0.7	0.6
2014-03-19	13	-99	-99	0.5	-99	-99	0.7	0.7	-99	0.5	-99	-99	0.6	-99	0.4	0.5	-99	0.5	0.2	0.9	0.3	0.7	-99	0.9	-99	0.3	0.4
2014-03-19	14	-99	-99	0.5	-99	-99	0.8	0.7	-99	0.5	-99	-99	0.6	-99	0.3	0.5	-99	0.5	0.3	0.9	0.3	0.8	-99	0.8	-99	0.3	0.5
2014-03-19	15	-99	-99	0.6	-99	-99	0.7	0.8	-99	0.5	-99	-99	0.7	-99	0.4	0.5	-99	0.6	0.4	0.8	0.4	1	-99	0.7	-99	0.3	0.7
2014-03-19	16	-99	-99	0.7	-99	-99	0.7	0.9	-99	0.5	-99	-99	0.7	-99	0.4	0.4	-99	0.6	0.4	0.7	0.4	0.8	-99	0.7	-99	0.4	0.6
2014-03-19	17	-99	-99	0.8	-99	-99	-99	0.9	-99	0.6	-99	-99	0.7	-99	0.4	0.3	-99	0.5	0.5	0.7	0.4	1	-99	0.7	-99	0.3	0.9
2014-03-19	18	-99	-99	1.2	-99	-99	-99	1.5	-99	0.6	-99	-99	0.8	-99	0.5	0.3	-99	0.4	0.7	0.7	0.4	1.6	-99	0.7	-99	0.2	0.9
2014-03-19	19	-99	-99	1	-99	-99	-99	1.7	-99	1.7	-99	-99	1.4	-99	0.8	0.4	-99	0.3	0.9	0.9	0.4	1.4	-99	0.7	-99	0.4	0.9
2014-03-19	20	-99	-99	1.1	-99	-99	-99	1.4	-99	1.6	-99	-99	1.3	-99	1	1.2	-99	0.5	0.8	2.6	0.6	1.2	-99	0.8	-99	0.4	1.1
2014-03-19	21	-99	-99	1.1	-99	-99	-99	1.2	-99	1.2	-99	-99	0.9	-99	1.8	0.8	-99	0.7	0.7	1.9	0.5	1.1	-99	0.9	-99	0.5	1.1
2014-03-19	22	-99	-99	1.3	-99	-99	-99	0.7	-99	1.3	-99	-99	1.4	-99	1.4	0.9	-99	0.8	1	1.8	1	1.3	-99	1.8	-99	0.5	0.8
2014-03-19	23	-99	-99	1	-99	-99	-99	0.7	-99	1.2	-99	-99	1.5	-99	1.6	0.9	-99	0.7	1.1	1.6	0.9	1	-99	1.6	-99	0.3	1
2014-03-19	24	-99	-99	0.4	-99	-99	-99	0.5	0.5	0.6	-99	-99	0.7	-99	1	0.6	-99	0.7	0.9	0.9	1.2	0.5	-99	1.5	-99	0.2	-99
2014-03-20	1	-99	-99	0.4	-99	-99	0.8	0.4	0.3	0.3	-99	-99	0.5	-99	0.6	0.4	-99	0.5	0.8	0.7	1	0.5	-99	0.8	-99	0.2	-99
2014-03-20	2	-99	-99	0.4	-99	-99	0.6	0.4	0.3	0.3	-99	-99	0.5	-99	0.5	0.4	-99	0.5	0.8	0.7	0.6	0.3	-99	0.9	-99	0.3	-99
2014-03-20	3	-99	-99	0.2	-99	-99	0.6	0.3	0.2	0.2	-99	-99	0.4	-99	0.3	0.3	-99	0.4	0.5	0.9	0.7	0.2	-99	0.9	-99	0.2	-99
2014-03-20	4	-99	-99	0.2	-99	-99	0.5	0.4	0.2	0.2	-99	-99	0.3	-99	0.2	0.3	-99	0.4	0.4	0.5	0.5	0.2	-99	0.9	-99	0.5	-99
2014-03-20	5	-99	-99	0.2	-99	-99	0.5	0.3	0.2	0.5	-99	-99	0.4	-99	0.3	0.4	-99	0.3	0.4	0.5	0.5	0.2	-99	0.9	-99	0.6	-99
2014-03-20	6	-99	-99	0.3	-99	-99	0.6	0.3	0.3	0.5	-99	-99	0.7	-99	0.6	0.4	-99	0.5	0.7	0.7	0.7	0.4	-99	0.8	-99	0.7	0.9
2014-03-20	7	-99	-99	0.6	-99	-99	0.9	0.6	0.4	0.7	-99	-99	1.1	-99	1	0.4	-99	0.7	1.1	1.2	0.9	0.6	-99	1.2	-99	0.7	1.4
2014-03-20	8	-99	-99	0.9	-99	-99	0.7	1	0.8	2.1	-99	-99	1.6	-99	1.4	0.9	-99	0.8	1.7	1.8	0.8	0.9	-99	1.5	-99	0.7	1.5
2014-03-20	9	-99	-99	1	-99	-99	0.5	1	0.9	1.3	-99	-99	1.5	-99	0.9	0.6	-99	0.3	1.2	1.8	0.9	1.3	-99	1.7	-99	0.5	1.6
2014-03-20	10	-99	-99	0.9	-99	-99	0.7	1	1.1	1	-99	-99	1.7	-99	0.7	0.7	-99	0.5	1.2	1.5	0.9	0.9	-99	1.7	-99	0.3	1.4
2014-03-20	11	-99	-99	0.9	-99	-99	0.7	0.9	1	1.1	-99	-99	1.5	-99	0.8	0.6	-99	0.6	1	1.3	0.9	0.9	-99	-99	-99	0.2	1
2014-03-20	12	-99	-99	1	-99	-99	0.8	0.7	1.2	1.2	-99	-99	1.5	-99	0.6	0.8	-99	0.7	0.7	1.4	0.9	0.9	-99	-99	-99	0.3	0.7
2014-03-20	13	-99	-99	0.9	-99	-99	0.8	0.9	1.4	0.8	-99	-99	0.9	-99	0.4	0.9	-99	0.7	0.4	1.4	0.9	0.8	-99	-99	-99	0.3	0.6
2014-03-20	14	-99	-99	0.8	-99	-99	0.9	1	0.9	0.5	-99	-99	0.8	-99	0.4	0.9	-99	0.9	0.3	1.2	0.8	0.8	-99	-99	-99	0.3	-99
2014-03-20	15	-99	-99	0.7	-99	-99	1.3	1.1	0.7	0.5	-99	-99	0.8	-99	0.5	0.8	-99	1	0.3	1	0.8	1	-99	0.6	-99	0.4	0.6
2014-03-20	16	-99	-99	0.7	-99	-99	1.1	1.2	0.7	0.6	-99	-99	0.8	-99	0.4	0.7	-99	0.8	0.3	0.7	-99	1.1	-99	0.5	-99	0.3	0.6
2014-03-20	17	-99	-99	0.8	-99	-99	1	1	0.8	0.6	-99	-99	0.9	-99	0.5	0.5	-99	0.8	0.4	0.7	-99	1	-99	0.5	-99	0.3	0.7
2014-03-20	18	-99	-99	0.8	-99	-99	0.7	1.2	0.9	0.7	-99	-99	0.7	-99	0.6	0.5	-99	0.6	0.4	0.9	-99	0.9	-99	0.7	-99	0.3	0.6
2014-03-20	19	-99	-99	0.8	-99	-99	0.8	1	0.9	0.7	-99	-99	0.8	-99	0.7	0.5	-99	0.7	0.6	0.7	-99	0.8	-99	0.4	-99	0.4	0.6
2014-03-20	20	-99	-99	0.7	-99	-99	0.9	0.6	0.9	0.8	-99	-99	1.1	-99	0.9	0.5	-99	0.8	0.5	1	-99	0.7	-99	0.5	-99	0.4	0.4
2014-03-20	21	-99	-99	0.5	-99	-99	1.1	0.7	0.5	1.1	-99	-99	0.7	-99	0.8	1	-99	0.9	0.4	1.3	-99	0.5	-99	0.9	-99	0.3	0.3
2014-03-20	22	-99	-99	0.4	-99	-99	0.8	0.6	0.5	0.4	-99	-99	0.7	-99	0.7	0.7	-99	0.5	0.4	1.2	-99	0.5	-99	1.3	-99	0.3	0.4
2014-03-20	23	-99	-99	0.4	-99	-99	0.6	0.6	0.5	0.4	-99	-99	0.6	-99	0.6	0.3	-99	0.4	0.3	1	-99	0.6	-99	0.6	-99	0.3	0.4
2014-03-20	24	-99	-99	0.4	-99	-99	0.5	0.5	0.5	0.3	-99	-99	0.5	-99	0.5	0.3	-99	0.4	0.3	0.8	-99	0.5	-99	-99	-99	0.2	0.4
2014-03-21	1	-99	-99	0.3	-99	-99	0.5	0.5	0.4	0.2	-99	-99	0.5	-99	0.3	0.3	-99	0.4	0.3	0.6	0.6	0.4	-99	-99	-99	0.2	0.5
2014-03-21	2	-99	-99	0.3	-99	-99	0.6	0.5	0.5	0.3	-99	-99	0.5	-99	0.4	0.4	-99	0.5	0.3	0.6	0.6	0.4	-99	-99	-99	0.2	0.5
2014-03-21	3	-99	-99	0.4	-99	-99	0.6	0.5	0.5	0.4	-99	-99	0.5	-99	0.3	0.4	-99	0.4	0.3	0.6	0.6	0.5	-99	-99	-99	0.3	0.3
2014-03-21	4	-99	-99	0.4	-99	-99	0.6	0.5	0.6	0.5	-99	-99	0.4	-99	0.2	0.4	-99	0.3	0.2	0.8	0.6	0.5	-99	-99	-99	0.4	0.3
2014-03-21	5	-99	-99	0.7	-99	-99	0.8	0.6	0.5	0.4	-99	-99	0.4	-99	0.3	0.3	-99	0.3	0.3	0.9	0.7	0.5	-99	-99	-99	0.3	0.5
2014-03-21	6	-99	-99	0.9	-99	-99	0.7	0.8	0.7	0.8	-99	-99	0.9	-99	0.6	0.3	-99	0.4	0.4	1.1	1.1	0.7	-99	0.7	-99	0.6	1
2014-03-21	7	-99	-99	1.6	-99	-99	0.9	1.7	1.3	2.3	-99	-99	1.7	-99	1.1	0.7	-99	0.6	1.4	1.7	1.8	1.5	-99	1.5	-99	0.9	2
2014-03-21	8	-99	-99	1.5	-99	-99	-99	3.1	2	2.5	-99	-99	1.8	-99	1.4	1.1	-99	0.8	1.8	2.1	1.6	2.9	-99	1.8	-99	1.4	2.3
2014-03-21	9	-99	-99	1.9	-99	-99	0.7	1.8	2	1.8	-99	-99	1.7	-99	1.5	0.9	-99	0.6	1.1	1.7	1.2	2	-99	1.4	-99	1.1	2.2
2014-03-21	10	-99	-99	1.9	-99	-99	1.2	2.2	1.6	1.2	-99	-99	1.4	-99	1.1	1	-99	1	1	1.9	1.1	2.2	-99	1.5	-99	0.7	1.6
2014-03-21	11	-99	-99	1.3	-99	-99	1.3	1.5	1.3	0.9	-99	-99	1.1	-99	1	1.4	-99	1.2	0.6	1.7	0.9	1.8	-99	1.7	-99	0.9	1
2014-03-21	12	-99	-99	0.9	-99	-99	1	1.1	0.8	0.6	-99	-99	0.8	-99	0.6	0.9	-99	1.2	0.4	1.2	0.9	0.7	-99	0.7	-99	0.5	0.8
2014-03-21	13	-99	-99	0.8	-99	-99	0.7	0.7	0.6	0.3	-99	-99	0.5	-99	0.3	0.5	-99	0.6	0.3	0.7	0.7	0.5	-99	0.5	-99	0.3	0.6
2014-03-21	14	-99	-99	0.6	-99	-99	0.6	0.6	0.6	0.4	-99	-99	0.6	-99	0.4	0.4	-99	0.4	0.3	0.7	0.6	0.5	-99	0.4	-99	0.3	0.5
2014-03-21	15	-99	-99	0.4	-99	-99	0.5	0.4	0.5	0.5	-99	-99	0.7	-99	0.4	0.5	-99	0.2	0.2	0.8	0.6	0.6	-99	0.4	-99	0.1	0.4
2014-03-21	16	-99	-99	-99	-99	-99	-99	0.5	0.4	0.4	-99	-99	0.4	-99	0.4	0.3	-99	0.2	0.2	0.9	-99	0.7	-99	0.5	-99	0.2	0.3
2014-03-21	17	-99	-99	0.4	-99	-99	-99	0.6	0.4	0.4	-99	-99	0.8	-99	0.4	0.4	-99	0.2	0.2	0.8	-99	0.6	-99	0.5	-99	0.1	0.4
2014-03-21	18	-99	-99	0.6	-99	-99	-99	0.8	0.7	0.5	-99	-99	0.9	-99	0.7	0.6	-99	0.5	0.3	0.9	-99	0.6	-99	0.5	-99	0.2	0.3
2014-03-21	19	-99	-99	0.9	-99	-99	-99	0.8	0.7	1	-99	-99	1.3	-99	0.9	0.9	-99	0.9	0.5	1.6	0.8	0.9	-99	0.9	-99	0.4	0.4
2014-03-21	20	-99	-99	0.7	-99	-99	-99	0.9	0.8	0.6	-99	-99	0.8	-99	0.5	0.6	-99	0.7	0.4	1	0.6	1	-99	0.5	-99	0.3	0.6
2014-03-21	21	-99	-99	0.6	-99	-99	-99	1.2	0.7	0.7	-99	-99	0.7	-99	0.6	0.6	-99	0.7	0.5	0.9	0.7	0.8	-99	0.7	-99	0.6	0.6
2014-03-21	22	-99	-99	0.8	-99	-99	-99	1.8	0.8	1.1	-99	-99	1	-99	0.8	0.9	-99	0.7	0.8	0.8	0.7	1.2	-99	0.7	-99	0.9	1.1
2014-03-21	23	-99	-99	0.9	-99	-99	-99	2.2	1.2	1	-99	-99	1.1	-99	1.4	0.7	-99	0.6	1	0.8	1	1.5	-99	0.5	-99	1.1	1.8
2014-03-21	24	-99	-99	1.2	-99	-99	-99	1.3	1.4	1.3	-99	-99	1.8	-99	1	0.5	-99	0.7	1.4	1.1	0.9	1.9	-99	0.7	-99	0.7	2
2014-03-22	1	-99	-99	1	-99	-99	0.6	1.2	1.4	2	-99	-99	2.3	-99	0.8	0.4	-99	0.5	1.4	1.2	0.8	1.2	-99	0.9	-99	0.6	2
2014-03-22	2	-99	-99	1	-99	-99	0.8	1.3	1.3	1.4	-99	-99	2.2	-99	0.6	0.3	-99	0.3	1.6	1	0.9	0.8	-99	0.7	-99	0.5	1.6
2014-03-22	3	-99	-99	1	-99	-99	0.9	0.9	1.4	1.2	-99	-99	1.7	-99	0.3	0.2	-99	0.4	1.1	0.9	0.7	0.8	-99	0.6	-99	0.7	1.4
2014-03-22	4	-99	-99	0.8	-99	-99	0.7	1	0.9	0.8	-99	-99	1.4	-99	0.5	0.3	-99	0.3	1.3	0.7	0.6	1	-99	0.6	-99	0.6	1.1
2014-03-22	5	-99	-99	0.7	-99	-99	0.6	1.2	1	0.7	-99	-99	1.6	-99	0.4	0.5	-99	0.3	1.1	0.7	0.6	0.6	-99	0.7	-99	0.7	1.1
2014-03-22	6	-99	-99	1.1	-99	-99	0.8	1.3	1.4	1	-99	-99	2.2	-99	0.7	0.3	-99	0.3	1.7	1.2	0.7	0.8	-99	0.9	-99	0.8	1.7
2014-03-22	7	-99	-99	1.3	-99	-99	1.2	1.8	1.1	1.5	-99	-99	2.5	-99	1.4	0.3	-99	0.5	1.5	2.2	1.4	1.2	-99	1	-99	0.9	2.2
2014-03-22	8	-99	-99	2.3	-99	-99	1.2	2.4	1.6	2.1	-99	-99	2.1	-99	2.2	0.5	-99	0.6	1.2	2.2	1.6	1.6	-99	1.3	-99	1.5	2.2
2014-03-22	9	-99	-99	1.6	-99	-99	1	1.8	1.6	1.7	-99	-99	2.2	-99	2.7	0.7	-99	0.6	1.3	1.6	1.6	1.5	-99	1.1	-99	1.2	2.1
2014-03-22	10	-99	-99	1	-99	-99	1.1	1.4	1.5	1.4	-99	-99	2	-99	1.9	1	-99	0.8	1.2	1	0.9	1.9	-99	1.1	-99	0.8	1.3
2014-03-22	11	-99	-99	0.9	-99	-99	0.7	1	0.9	0.9	-99	-99	1.2	-99	1	0.9	-99	0.6	0.9	1.1	0.6	1.5	-99	1.6	-99	0.6	1.3
2014-03-22	12	-99	-99	0.5	-99	-99	0.7	0.6	0.7	0.7	-99	-99	0.9	-99	0.5	0.7	-99	0.5	0.7	1.3	1	0.9	-99	1.2	-99	0.3	0.8
2014-03-22	13	-99	-99	0.6	-99	-99	0.6	0.6	0.6	0.6	-99	-99	0.7	-99	0.4	0.4	-99	0.4	0.4	0.9	0.7	0.7	-99	0.7	-99	0.3	0.5
2014-03-22	14	-99	-99	0.7	-99	-99	0.5	0.8	0.5	0.4	-99	-99	0.4	-99	0.4	0.3	-99	0.3	0.3	0.7	0.4	0.6	-99	0.5	-99	0.2	0.5
2014-03-22	15	-99	-99	0.5	-99	-99	0.5	0.7	0.4	0.4	-99	-99	0.7	-99	0.4	0.3	-99	0.3	0.2	0.7	0.4	0.4	-99	0.2	-99	0.2	0.4
2014-03-22	16	-99	-99	0.5	-99	-99	0.4	0.7	0.5	0.4	-99	-99	0.8	-99	0.3	0.2	-99	0.3	0.3	0.7	0.4	0.5	-99	0.2	-99	0.3	0.5
2014-03-22	17	-99	-99	0.5	-99	-99	-99	0.7	0.5	0.5	-99	-99	0.6	-99	0.3	0.2	-99	0.3	0.3	0.6	0.3	0.6	-99	0.3	-99	0.3	0.4
2014-03-22	18	-99	-99	0.7	-99	-99	-99	0.6	0.4	0.4	-99	-99	0.5	-99	0.4	0.2	-99	0.4	0.3	0.5	0.4	0.8	-99	0.3	-99	0.3	0.6
2014-03-22	19	-99	-99	0.7	-99	-99	-99	0.8	0.5	0.4	-99	-99	0.5	-99	0.4	0.2	-99	0.4	0.4	0.5	0.3	1.3	-99	0.4	-99	0.3	0.6
2014-03-22	20	-99	-99	0.3	-99	-99	0.3	0.7	0.6	0.5	-99	-99	0.7	-99	0.5	0.2	-99	0.3	0.5	0.7	0.3	1	-99	0.4	-99	0.4	0.7
2014-03-22	21	-99	-99	0.6	-99	-99	0.4	0.5	0.4	0.7	-99	-99	1.1	-99	0.9	0.5	-99	0.4	0.6	1	0.5	0.8	-99	0.5	-99	-99	0.8
2014-03-22	22	-99	-99	0.3	-99	-99	0.4	0.4	0.4	0.3	-99	-99	0.5	-99	0.8	0.4	-99	0.3	0.2	0.9	0.8	0.4	-99	0.6	-99	-99	0.2
2014-03-22	23	-99	-99	0.3	-99	-99	0.4	0.4	0.4	0.2	-99	-99	0.5	-99	0.5	0.2	-99	0.2	0.2	0.5	0.5	0.4	-99	0.4	-99	-99	0.2
2014-03-22	24	-99	-99	0.3	-99	-99	0.4	0.4	0.4	0.3	-99	-99	0.5	-99	0.4	0.2	-99	-99	0.2	0.5	0.6	0.4	-99	0.4	-99	0.3	0.3
2014-03-23	1	-99	-99	0.3	-99	-99	0.6	0.3	0.3	0.3	-99	-99	0.5	-99	0.4	0.3	-99	-99	0.2	0.6	0.6	0.4	-99	0.5	-99	0.3	0.5
2014-03-23	2	-99	-99	0.3	-99	-99	0.5	0.5	0.4	0.3	-99	-99	0.4	-99	0.3	0.3	-99	-99	0.3	0.7	0.5	0.5	-99	0.5	-99	0.3	0.6
2014-03-23	3	-99	-99	0.4	-99	-99	0.4	0.6	0.4	0.6	-99	-99	0.4	-99	0.3	0.2	-99	-99	0.3	0.6	0.5	0.5	-99	0.7	-99	0.5	0.5
2014-03-23	4	-99	-99	0.5	-99	-99	0.6	0.6	0.6	0.6	-99	-99	0.4	-99	0.2	0.2	-99	-99	0.3	1	0.4	0.5	-99	0.6	-99	0.5	0.4
2014-03-23	5	-99	-99	0.6	-99	-99	0.7	0.6	0.5	0.5	-99	-99	0.6	-99	0.3	0.2	-99	-99	0.3	0.8	0.6	0.6	-99	0.5	-99	0.4	0.5
2014-03-23	6	-99	-99	0.6	-99	-99	0.5	0.6	0.6	0.6	-99	-99	0.8	-99	0.6	0.1	-99	0.2	0.7	0.8	0.9	0.6	-99	0.7	-99	0.5	0.9
2014-03-23	7	-99	-99	1	-99	-99	0.5	0.7	0.9	1.3	-99	-99	1.2	-99	0.7	0.2	-99	0.3	1.4	1.1	0.9	0.7	-99	0.7	-99	0.7	0.9
2014-03-23	8	-99	-99	0.8	-99	-99	1	1.4	1.3	1.6	-99	-99	1.5	-99	1.8	0.5	-99	0.4	1.1	1.1	1.1	0.7	-99	1	-99	1	0.9
2014-03-23	9	-99	-99	1.1	-99	-99	0.4	1.3	1.3	1.6	-99	-99	1.3	-99	1.7	0.7	-99	0.3	0.5	1	0.6	1	-99	0.8	-99	1.1	0.9
2014-03-23	10	-99	-99	1	-99	-99	0.6	1.5	1.7	1.3	-99	-99	1.3	-99	1.4	0.7	-99	0.5	0.5	0.8	0.5	1	-99	0.6	-99	0.8	0.8
2014-03-23	11	-99	-99	0.7	-99	-99	0.5	1	1.2	0.8	-99	-99	1.1	-99	1.2	0.5	-99	0.4	0.5	0.8	0.5	0.8	-99	0.6	-99	0.7	0.8
2014-03-23	12	-99	-99	0.4	-99	-99	0.5	0.6	0.7	0.5	-99	-99	0.7	-99	0.9	0.3	-99	0.3	0.3	0.6	0.4	0.9	-99	0.5	-99	0.5	0.6
2014-03-23	13	-99	-99	0.3	-99	-99	0.4	0.5	0.4	0.4	-99	-99	0.6	-99	0.7	0.2	-99	0.3	0.2	0.6	0.3	0.6	-99	0.4	-99	0.3	0.4
2014-03-23	14	-99	-99	0.4	-99	-99	0.3	0.4	0.3	0.3	-99	-99	0.6	-99	0.5	0.2	-99	0.2	0.3	-99	0.3	0.5	-99	0.3	-99	0.3	0.4
2014-03-23	15	-99	-99	0.4	-99	-99	-99	0.4	0.4	0.4	-99	-99	0.5	-99	0.5	0.2	-99	0.2	0.3	-99	0.4	0.5	-99	0.3	-99	0.3	0.3
2014-03-23	16	-99	-99	0.4	-99	-99	-99	0.5	0.3	0.5	-99	-99	0.5	-99	0.2	0.2	-99	0.2	0.2	-99	0.4	0.5	-99	0.3	-99	0.3	0.4
2014-03-23	17	-99	-99	0.4	-99	-99	-99	0.5	0.4	0.4	-99	-99	0.4	-99	0.3	0.2	-99	0.2	0.2	-99	0.4	0.6	-99	0.3	-99	0.3	0.4
2014-03-23	18	-99	-99	0.5	-99	-99	-99	0.5	0.4	0.5	-99	-99	0.6	-99	0.3	0.3	-99	0.3	0.3	-99	0.5	0.6	-99	0.3	-99	0.4	0.5
2014-03-23	19	-99	-99	0.5	-99	-99	-99	0.5	0.5	0.5	-99	-99	0.5	-99	0.4	0.3	-99	0.3	0.5	-99	0.6	0.6	-99	0.3	-99	0.3	0.5
2014-03-23	20	-99	-99	0.6	-99	-99	-99	0.5	0.6	0.5	-99	-99	0.7	-99	0.6	0.3	-99	0.4	0.6	-99	0.4	0.5	-99	0.5	-99	0.5	0.6
2014-03-23	21	-99	-99	0.4	-99	-99	-99	0.4	0.6	0.6	-99	-99	0.9	-99	1.2	0.5	-99	0.5	0.6	-99	0.6	0.7	-99	0.5	-99	0.4	0.6
2014-03-23	22	-99	-99	0.3	-99	-99	-99	0.5	0.4	0.3	-99	-99	0.6	-99	1	0.5	-99	0.4	0.3	-99	0.7	0.5	-99	0.5	-99	0.4	0.3
2014-03-23	23	-99	-99	0.3	-99	-99	-99	0.4	0.4	0.3	-99	-99	0.5	-99	0.8	0.3	-99	0.4	0.2	-99	0.7	0.4	-99	0.5	-99	0.4	0.3
2014-03-23	24	-99	-99	0.3	-99	-99	-99	0.4	0.4	0.2	-99	-99	0.4	-99	0.6	0.3	-99	0.3	0.2	-99	0.5	-99	-99	0.6	-99	0.3	0.5
2014-03-24	1	-99	-99	0.3	-99	-99	-99	0.4	0.4	0.2	-99	-99	0.4	-99	0.4	0.1	-99	0.2	0.1	-99	0.4	-99	-99	0.8	-99	0.3	1.1
2014-03-24	2	-99	-99	0.3	-99	-99	-99	0.4	0.4	0.2	-99	-99	0.4	-99	0.4	0.1	-99	0.1	0.2	-99	0.6	-99	-99	0.6	-99	0.2	0.4
2014-03-24	3	-99	-99	0.3	-99	-99	-99	0.4	0.3	0.2	-99	-99	0.4	-99	-99	0.2	-99	0.1	0.2	-99	0.5	-99	-99	0.5	-99	0.3	0.4
2014-03-24	4	-99	-99	0.2	-99	-99	-99	0.3	0.3	0.3	-99	-99	0.4	-99	0.1	0.2	-99	0.1	0.4	-99	0.5	-99	-99	0.7	-99	0.3	0.8
2014-03-24	5	-99	-99	0.2	-99	-99	-99	0.4	0.3	0.4	-99	-99	0.4	-99	0.2	0.2	-99	0.1	0.5	-99	0.6	-99	-99	0.6	-99	0.3	0.6
2014-03-24	6	-99	-99	0.4	-99	-99	-99	0.7	0.4	0.7	-99	-99	0.6	-99	-99	0.2	-99	0.2	0.8	-99	0.6	0.5	-99	0.9	-99	0.6	0.8
2014-03-24	7	-99	-99	1	-99	-99	-99	2	1.2	1.2	-99	-99	1.2	-99	-99	0.5	-99	0.4	1.1	-99	0.5	1.1	-99	1.1	-99	0.8	1.5
2014-03-24	8	-99	-99	2	-99	-99	-99	4.2	1.7	1.7	-99	-99	1.5	-99	1	1	-99	0.5	1.1	-99	1.1	1.7	-99	1.3	-99	1.8	1.6
2014-03-24	9	-99	-99	1.6	-99	-99	-99	2.2	1.6	1.3	-99	-99	1.5	-99	1.2	0.6	-99	0.6	1	-99	1.2	1.4	-99	1.1	-99	1.1	1.3
2014-03-24	10	-99	-99	-99	-99	-99	-99	2.4	1.6	1.2	-99	-99	1.5	-99	1.3	0.9	-99	0.8	0.7	-99	0.6	1.7	-99	0.8	-99	1.2	1.1
2014-03-24	11	-99	-99	-99	-99	-99	-99	1.8	1.3	1.1	-99	-99	1.1	-99	1	0.7	-99	0.7	0.5	-99	0.4	1.5	-99	1.2	-99	1.2	0.9
2014-03-24	12	-99	-99	-99	-99	-99	-99	1	0.7	0.8	-99	-99	0.7	-99	-99	0.5	-99	0.6	0.2	-99	0.4	0.7	-99	0.8	-99	0.5	0.5
2014-03-24	13	-99	-99	0.5	-99	-99	-99	0.6	0.6	0.4	-99	-99	0.7	-99	0.6	0.5	-99	0.5	0.3	-99	0.3	0.6	-99	0.3	-99	-99	0.4
2014-03-24	14	-99	-99	0.5	-99	-99	-99	0.7	0.4	0.3	-99	-99	0.5	-99	0.3	0.4	-99	0.4	0.2	-99	0.3	0.6	-99	0.3	-99	-99	0.5
2014-03-24	15	-99	-99	0.6	-99	-99	-99	0.7	0.4	0.2	-99	-99	0.4	-99	0.2	0.2	-99	0.4	0.2	-99	-99	0.7	-99	0.3	-99	-99	0.5
2014-03-24	16	-99	-99	0.5	-99	-99	-99	0.8	0.3	0.3	-99	-99	0.3	-99	0.2	0.2	-99	0.3	0.2	-99	-99	0.8	-99	0.3	-99	-99	0.5
2014-03-24	17	-99	-99	0.4	-99	-99	-99	0.8	0.4	0.4	-99	-99	0.4	-99	0.3	0.3	-99	0.4	0.2	-99	0.7	0.6	-99	0.4	-99	-99	0.6
2014-03-24	18	-99	-99	0.6	-99	-99	-99	0.8	0.6	0.5	-99	-99	0.7	-99	0.4	0.4	-99	0.2	0.4	-99	0.7	0.9	-99	0.4	-99	0.4	0.6
2014-03-24	19	-99	-99	0.5	-99	-99	-99	0.3	0.6	0.5	-99	-99	0.9	-99	0.7	0.4	-99	0.3	0.4	-99	0.7	0.6	-99	0.4	-99	0.4	0.7
2014-03-24	20	-99	-99	0.3	-99	-99	-99	0.5	0.4	0.5	-99	-99	0.7	-99	0.5	0.3	-99	0.3	0.3	-99	0.6	0.6	-99	0.4	-99	0.4	0.5
2014-03-24	21	-99	-99	0.5	-99	-99	-99	0.7	0.5	0.5	-99	-99	0.5	-99	0.3	0.3	-99	0.4	0.2	-99	0.5	0.7	-99	0.5	-99	0.4	0.5
2014-03-24	22	-99	-99	0.5	-99	-99	-99	1.1	0.5	0.5	-99	-99	0.5	-99	0.4	0.3	-99	0.5	0.2	-99	0.6	0.7	-99	0.5	-99	0.5	0.5
2014-03-24	23	-99	-99	0.5	-99	-99	-99	1.5	0.6	0.4	-99	-99	0.6	-99	0.6	0.4	-99	0.5	0.4	-99	0.6	1	-99	0.6	-99	0.6	0.5
2014-03-24	24	-99	-99	0.6	-99	-99	-99	1	0.6	0.5	-99	-99	-99	-99	0.7	0.5	-99	0.4	0.4	-99	0.7	0.9	-99	0.8	-99	0.5	0.7
2014-03-25	1	-99	-99	0.9	-99	-99	-99	0.9	0.7	0.7	-99	-99	-99	-99	0.8	0.3	-99	0.4	0.6	0.9	0.9	0.8	-99	0.9	-99	0.5	0.9
2014-03-25	2	-99	-99	0.7	-99	-99	-99	0.7	0.9	0.7	-99	-99	-99	-99	1	0.2	-99	0.2	0.8	0.6	0.6	0.7	-99	-99	-99	0.5	0.9
2014-03-25	3	-99	-99	0.5	-99	-99	-99	0.6	0.7	0.5	-99	-99	-99	-99	0.7	0.2	-99	0.2	1	0.6	0.5	0.4	-99	0.5	-99	0.4	0.6
2014-03-25	4	-99	-99	0.6	-99	-99	-99	0.5	0.6	0.4	-99	-99	-99	-99	0.5	0.2	-99	0.2	0.8	0.6	0.5	0.6	-99	0.6	-99	0.4	0.5
2014-03-25	5	-99	-99	0.9	-99	-99	-99	0.5	0.6	0.5	-99	-99	-99	-99	0.4	0.3	-99	0.2	0.5	0.6	0.4	0.5	-99	0.5	-99	0.5	1
2014-03-25	6	-99	-99	0.9	-99	-99	-99	0.7	0.8	0.6	-99	-99	1.3	-99	0.8	0.3	-99	0.4	1.2	0.8	0.9	0.8	-99	0.6	-99	0.7	2
2014-03-25	7	-99	-99	1.1	-99	-99	-99	1.4	1.2	1.3	-99	-99	1.8	-99	1.1	0.5	-99	0.7	3.2	1.7	1.6	1.7	-99	0.9	-99	1	1.9
[truncated: 6,761 more rows]

## Sheet: Plant  C  and ∂13C 2014
δ13C	site	Site ID		Wt% C*	site	Site ID	Location X	Location Y
-13.888	Zona rural Tolcayuca, Hidalgo	1		44.1862	Zona rural Tolcayuca, Hidalgo	1	-98.9328	19.9611
-13.8224	Zona rural Tolcayuca, Hidalgo	1		42.7467	Zona rural Tolcayuca, Hidalgo	1	-98.9328	19.9611
-14.2962	Zona rural Tolcayuca, Hidalgo	1		45.737	Zona rural Tolcayuca, Hidalgo	1	-98.9328	19.9611
-13.261	Zona rural Tolcayuca, Hidalgo	1		40.2467	Zona rural Tolcayuca, Hidalgo	1	-98.9328	19.9611
-13.9807	Zona rural Tolcayuca, Hidalgo	1		42.4014	Zona rural Tolcayuca, Hidalgo	1	-98.9328	19.9611
-14.9101	Zona urbana Tolcayuca, Hidalgo	2		38.0022	Zona urbana Tolcayuca, Hidalgo	2	-98.9096	19.9542
-14.5774	Zona urbana Tolcayuca, Hidalgo	2		38.8586	Zona urbana Tolcayuca, Hidalgo	2	-98.9096	19.9542
-14.7538	Zona urbana Tolcayuca, Hidalgo	2		38.4304	Zona urbana Tolcayuca, Hidalgo	2	-98.9096	19.9542
-14.7818	Zona urbana Tolcayuca, Hidalgo	2		37.7676	Zona urbana Tolcayuca, Hidalgo	2	-98.9096	19.9542
-14.886	Zona urbana Tolcayuca, Hidalgo	2		38.999	Zona urbana Tolcayuca, Hidalgo	2	-98.9096	19.9542
-15.9552	Parque central, Pachuca, Hidalgo	3		43.9606	Parque central, Pachuca, Hidalgo	3	-98.7361	20.1222
-16.157	Parque central, Pachuca, Hidalgo	3		42.6028	Parque Pasteur, Pachuca Hidalgo	3	-98.7361	20.1222
-16.3658	Parque central, Pachuca, Hidalgo	3		41.7555	Parque Pasteur, Pachuca Hidalgo	3	-98.7361	20.1222
-15.9292	Parque Pasteur, Pachuca Hidalgo	3		42.6211	Parque Pasteur, Pachuca Hidalgo	3	-98.7361	20.1222
-17.1418	Parque Pasteur, Pachuca Hidalgo	3		41.8389	Parque Pasteur, Pachuca Hidalgo	3	-98.7361	20.1222
-14.9627	Epazoyucano, Hidalgo México	5		40.9937	Epazoyucano, Hidalgo México	5	-98.6338	20.0186
-15.1349	Epazoyucano, Hidalgo México	5		41.5851	Epazoyucano, Hidalgo México	5	-98.6338	20.0186
-15.5149	Epazoyucano, Hidalgo México	5		43.0115	Epazoyucano, Hidalgo México	5	-98.6338	20.0186
-14.4252	Epazoyucano, Hidalgo México	5		42.1559	Epazoyucano, Hidalgo México	5	-98.6338	20.0186
-14.776	Epazoyucano, Hidalgo México	5		43.0332	Epazoyucano, Hidalgo México	5	-98.6338	20.0186
-15.028	Edo. Hidalgo, México.	6		41.1026	Edo. Hidalgo, México.	6	-98.6158	19.9394
-14.5301	Edo. Hidalgo, México.	6		39.1078	Edo. Hidalgo, México.	6	-98.6158	19.9394
-14.642	Edo. Hidalgo, México.	6		43.1001	Edo. Hidalgo, México.	6	-98.6158	19.9394
-15.0037	Edo. Hidalgo, México.	6		43.2643	Edo. Hidalgo, México.	6	-98.6158	19.9394
-14.4545	Edo. Hidalgo, México.	6		38.9402	Edo. Hidalgo, México.	6	-98.6158	19.9394
-15.4463	Zampoala, Hidalgo, México	7		37.5124	Zampoala, Hidalgo, México	7	-98.672	19.9111
-15.6328	Zampoala, Hidalgo, México	7		41.2786	Zampoala, Hidalgo, México	7	-98.672	19.9111
-15.6973	Zampoala, Hidalgo, México	7		43.6414	Zampoala, Hidalgo, México	7	-98.672	19.9111
-14.755	Zampoala, Hidalgo, México	7		42.9426	Zampoala, Hidalgo, México	7	-98.672	19.9111
-14.9329	Zampoala, Hidalgo, México	7		41.3438	Zampoala, Hidalgo, México	7	-98.672	19.9111
-14.2843	Tepeyahualco, Hidalgo, México	8		43.8766	Tepeyahualco, Hidalgo, México	8	-98.6712	19.8494
-14.2923	Tepeyahualco, Hidalgo, México	8		43.9689	Tepeyahualco, Hidalgo, México	8	-98.6712	19.8494
-14.4513	Tepeyahualco, Hidalgo, México	8		43.9645	Tepeyahualco, Hidalgo, México	8	-98.6712	19.8494
-13.9036	Tepeyahualco, Hidalgo, México	9		43.2926	Tepeyahualco, Hidalgo, México	8	-98.6712	19.8494
-14.1647	Tepeyahualco, Hidalgo, México	8		43.7757	Tepeyahualco, Hidalgo, México	8	-98.6712	19.8494
-14.9004	Teotihucan, Edo. México	9		42.0078	Teotihucan, Edo. México	9	-98.8462	19.6857
-14.2174	Teotihucan, Edo. México	9		43.0989	Teotihucan, Edo. México	9	-98.8462	19.6857
-14.8883	Teotihucan, Edo. México	9		41.9454	Teotihucan, Edo. México	9	-98.8462	19.6857
-13.8996	Teotihucan, Edo. México	9		45.1612	Teotihucan, Edo. México	9	-98.8462	19.6857
-13.2085	Teotihucan, Edo. México	9		43.9193	Teotihucan, Edo. México	9	-98.8462	19.6857
-14.5725	Tezoyuca, Edo. México	10		43.35	Tezoyuca, Edo. México	10	-98.9069	19.595
-15.1446	Tezoyuca, Edo. México	10		43.6961	Tezoyuca, Edo. México	10	-98.9069	19.595
-15.2283	Tezoyuca, Edo. México	10		45.477	Tezoyuca, Edo. México	10	-98.9069	19.595
-15.2848	Tezoyuca, Edo. México	10		44.8145	Tezoyuca, Edo. México	10	-98.9069	19.595
-14.8994	Tezoyuca, Edo. México	10		43.4193	Tezoyuca, Edo. México	10	-98.9069	19.595
-15.9446	Universidad Autónoma de Chapingo Edo. Mex	11		42.8184	Universidad Autónoma de Chapingo Edo. Mex	11	-98.8931	19.4928
-16.1797	Universidad Autónoma de Chapingo Edo. Mex	11		40.9222	Universidad Autónoma de Chapingo Edo. Mex	11	-98.8931	19.4928
-15.198	Universidad Autónoma de Chapingo Edo. Mex	11		44.1784	Universidad Autónoma de Chapingo Edo. Mex	11	-98.8931	19.4928
-15.1083	Universidad Autónoma de Chapingo Edo. Mex	11		42.74	Universidad Autónoma de Chapingo Edo. Mex	11	-98.8931	19.4928
-16.6256	Universidad Autónoma de Chapingo Edo. Mex	11		43.509	Universidad Autónoma de Chapingo Edo. Mex	11	-98.8931	19.4928
-16.6882	FES Zaragoza UNAM México D.F.	12		43.5192	FES Zaragoza UNAM México D.F.	12	-99.0379	19.3819
-17.0736	FES Zaragoza UNAM México D.F.	12		43.7009	FES Zaragoza UNAM México D.F.	12	-99.0379	19.3819
-16.6125	FES Zaragoza UNAM México D.F.	12		44.4452	FES Zaragoza UNAM México D.F.	12	-99.0379	19.3819
-16.6488	FES Zaragoza UNAM México D.F.	12		43.8372	FES Zaragoza UNAM México D.F.	12	-99.0379	19.3819
-16.9303	FES Zaragoza UNAM México D.F.	12		43.7168	FES Zaragoza UNAM México D.F.	12	-99.0379	19.3819
-15.9275	Tepotzotlan, Edo México	13		44.124	Tepotzotlan, Edo México	13	-99.2227	19.713
-14.737	Tepotzotlan, Edo México	13		43.3024	Tepotzotlan, Edo México	13	-99.2227	19.713
-14.7582	Tepotzotlan, Edo México	13		43.2759	Tepotzotlan, Edo México	13	-99.2227	19.713
-15.8982	Tepotzotlan, Edo México	13		43.6706	Tepotzotlan, Edo México	13	-99.2227	19.713
-16.3452	Tepotzotlan, Edo México	13		42.3844	Tepotzotlan, Edo México	13	-99.2227	19.713
-14.512	Laguna de Zumpango, Edo México	14		44.1378	Laguna de Zumpango, Edo México	14	-99.1139	19.8069
-14.855	Laguna de Zumpango, Edo México	14		43.0074	Laguna de Zumpango, Edo México	14	-99.1139	19.8069
-14.0025	Laguna de Zumpango, Edo México	14		44.5402	Laguna de Zumpango, Edo México	14	-99.1139	19.8069
-14.74	Laguna de Zumpango, Edo México	14		43.504	Laguna de Zumpango, Edo México	14	-99.1139	19.8069
-14.7138	Laguna de Zumpango, Edo México	14		44.4199	Laguna de Zumpango, Edo México	14	-99.1139	19.8069
-16.8707	Bosque San Juan Aragon, México D.F.	15		43.9677	Bosque San Juan Aragon, México D.F.	15	-99.0703	19.4625
-16.8258	Bosque San Juan Aragon, México D.F.	15		43.9651	Bosque San Juan Aragon, México D.F.	15	-99.0703	19.4625
-16.8886	Bosque San Juan Aragon, México D.F.	15		44.5061	Bosque San Juan Aragon, México D.F.	15	-99.0703	19.4625
-16.8603	Bosque San Juan Aragon, México D.F.	15		42.5374	Bosque San Juan Aragon, México D.F.	15	-99.0703	19.4625
-16.8413	Bosque San Juan Aragon, México D.F.	15		44.3996	Bosque San Juan Aragon, México D.F.	15	-99.0703	19.4625
-15.2495	Reserva del pedregal C.U. México D.F.	16		44.7075	Reserva del pedregal C.U. México D.F.	16	-99.1944	19.3114
-15.192	Reserva del pedregal C.U. México D.F.	16		45.376	Reserva del pedregal C.U. México D.F.	16	-99.1944	19.3114
-16.4208	Reserva del pedregal C.U. México D.F.	16		44.835	Reserva del pedregal C.U. México D.F.	16	-99.1944	19.3114
-16.0909	Reserva del pedregal C.U. México D.F.	16		44.7829	Reserva del pedregal C.U. México D.F.	16	-99.1944	19.3114
-16.4945	Reserva del pedregal C.U. México D.F.	16		44.9252	Reserva del pedregal C.U. México D.F.	16	-99.1944	19.3114
-16.5207	Parque Ecologico Xolchimilco México D.F.	17		44.6434	Parque Ecologico Xolchimilco México D.F.	17	-99.0899	19.2933
-16.2836	Parque Ecologico Xolchimilco México D.F.	17		43.778	Parque Ecologico Xolchimilco México D.F.	17	-99.0899	19.2933
-16.327	Parque Ecologico Xolchimilco México D.F.	17		44.4874	Parque Ecologico Xolchimilco México D.F.	17	-99.0899	19.2933
-16.9535	Parque Ecologico Xolchimilco México D.F.	17		44.2042	Parque Ecologico Xolchimilco México D.F.	17	-99.0899	19.2933
-16.9959	Parque Ecologico Xolchimilco México D.F.	17		43.5432	Parque Ecologico Xolchimilco México D.F.	17	-99.0899	19.2933
-16.6166	Ciudad Lopez Mateos Edo. México	18		38.7991	Ciudad Lopez Mateos Edo. México	18	-99.257	19.5588
-17.4671	Ciudad Lopez Mateos Edo. México	18		37.547	Ciudad Lopez Mateos Edo. México	18	-99.257	19.5588
-16.7911	Ciudad Lopez Mateos Edo. México	18		39.5293	Ciudad Lopez Mateos Edo. México	18	-99.257	19.5588
-17.3117	Ciudad Lopez Mateos Edo. México	18		40.8677	Ciudad Lopez Mateos Edo. México	18	-99.257	19.5588
-16.2776	Ciudad Lopez Mateos Edo. México	18		42.0474	Ciudad Lopez Mateos Edo. México	18	-99.257	19.5588
-15.6914	Parque Ecologico los Venados Edo. México	19		44.2996	Parque Ecologico los Venados Edo. México	19	-99.2877	19.5711
-16.4894	Parque Ecologico los Venados Edo. México	19		43.6737	Parque Ecologico los Venados Edo. México	19	-99.2877	19.5711
-17.0756	Parque Ecologico los Venados Edo. México	19		43.6021	Parque Ecologico los Venados Edo. México	19	-99.2877	19.5711
-16.898	Parque Ecologico los Venados Edo. México	19		43.027	Parque Ecologico los Venados Edo. México	19	-99.2877	19.5711
-15.7429	Parque Ecologico los Venados Edo. México	19		42.9934	Parque Ecologico los Venados Edo. México	19	-99.2877	19.5711
-16.3492	Ocuito, Morelos	20		44.1349	Ocuito, Morelos	20	-98.7896	18.8828
-15.0679	Ocuito, Morelos	20		44.0622	Ocuito, Morelos	20	-98.7896	18.8828
-15.4947	Ocuito, Morelos	20		45.906	Ocuito, Morelos	20	-98.7896	18.8828
-15.3292	Ocuito, Morelos	20		45.0444	Ocuito, Morelos	20	-98.7896	18.8828
-15.3837	Ocuito, Morelos	20		45.6634	Ocuito, Morelos	20	-98.7896	18.8828
-15.531	Parque nacional Cerro la Estrella	21		43.6501	Parque nacional Cerro la Estrella	21	-99.0899	19.3425
-15.5148	Parque nacional Cerro la Estrella	21		44.674	Parque nacional Cerro la Estrella	21	-99.0899	19.3425
-15.6359	Parque nacional Cerro la Estrella	21		43.9527	Parque nacional Cerro la Estrella	21	-99.0899	19.3425
-15.6742	Parque nacional Cerro la Estrella	21		44.2075	Parque nacional Cerro la Estrella	21	-99.0899	19.3425
-15.9729	Parque nacional Cerro la Estrella	21		44.2082	Parque nacional Cerro la Estrella	21	-99.0899	19.3425
-16.8003	Parque Nacional El Tepeyac, México D.F.	22		44.5557	Parque Nacional El Tepeyac, México D.F.	22	-99.1085	19.5047
-16.5233	Parque Nacional El Tepeyac, México D.F.	22		44.3828	Parque Nacional El Tepeyac, México D.F.	22	-99.1085	19.5047
-16.7938	Parque Nacional El Tepeyac, México D.F.	22		43.4557	Parque Nacional El Tepeyac, México D.F.	22	-99.1085	19.5047
-16.8523	Parque Nacional El Tepeyac, México D.F.	22		42.325	Parque Nacional El Tepeyac, México D.F.	22	-99.1085	19.5047
-16.311	Parque Nacional El Tepeyac, México D.F.	22		43.8574	Parque Nacional El Tepeyac, México D.F.	22	-99.1085	19.5047
-15.8085	Parque Bicentenario Ecatepec, Edo. México	23		42.7159	Parque Bicentenario Ecatepec, Edo. México	23	-99.0727	19.5569
-16.7481	Parque Bicentenario Ecatepec, Edo. México	23		43.5255	Parque Bicentenario Ecatepec, Edo. México	23	-99.0727	19.5569
-15.3593	Parque Bicentenario Ecatepec, Edo. México	23		43.989	Parque Bicentenario Ecatepec, Edo. México	23	-99.0727	19.5569
-15.1606	Parque Bicentenario Ecatepec, Edo. México	23		42.648	Parque Bicentenario Ecatepec, Edo. México	23	-99.0727	19.5569
-15.5132	Parque Bicentenario Ecatepec, Edo. México	23		42.993	Parque Bicentenario Ecatepec, Edo. México	23	-99.0727	19.5569
